# Supplementary material for: Systematic review and meta-analysis to examine intrapartum interventions, and maternal and neonatal outcomes following immersion in water during labour and waterbirth
Source: PubMed Central journal article supplement — BMJ Open. 2022 Jun 6;12(7):e056517. doi: 10.1136/bmjopen-2021-056517 (PMC9315919; doi:10.1136/bmjopen-2021-056517), 2022-06-06
Supplement: bmjopen-2021-056517.draft_revisions.pdf [file bmjopen-2021-056517.draft_revisions.pdf]

# BMJ Open

BMJ Open is committed to open peer review. As part of this commitment we make the peer review history of every article we publish publicly available.

When an article is published we post the peer reviewers' comments and the authors' responses online. We also post the versions of the paper that were used during peer review. These are the versions that the peer review comments apply to.

The versions of the paper that follow are the versions that were submitted during the peer review process. They are not the versions of record or the final published versions. They should not be cited or distributed as the published version of this manuscript.

BMJ Open is an open access journal and the full, final, typeset and author-corrected version of record of the manuscript is available on our site with no access controls, subscription charges or pay-per-view fees (<http://bmjopen.bmj.com>).

If you have any questions on BMJ Open's open peer review process please email [info.bmjopen@bmj.com](mailto:info.bmjopen@bmj.com)

# BMJ Open

**A systematic review and meta-analysis to examine intrapartum interventions, and maternal and neonatal outcomes following immersion in water during labour and waterbirth**

|                               |                                                                                                                                                                                                                                                                                                                                                                     |
|-------------------------------|---------------------------------------------------------------------------------------------------------------------------------------------------------------------------------------------------------------------------------------------------------------------------------------------------------------------------------------------------------------------|
| Journal:                      | <i>BMJ Open</i>                                                                                                                                                                                                                                                                                                                                                     |
| Manuscript ID                 | bmjopen-2021-056517                                                                                                                                                                                                                                                                                                                                                 |
| Article Type:                 | Original research                                                                                                                                                                                                                                                                                                                                                   |
| Date Submitted by the Author: | 02-Sep-2021                                                                                                                                                                                                                                                                                                                                                         |
| Complete List of Authors:     | Burns, Ethel ; Oxford Brookes University Faculty of Health and Life Sciences, Faculty of Health and Life Sciences<br>Feeley, Claire; Oxford Brookes University, Faculty of Health and Life Sciences<br>Hall, Priscilla J.; Emory University, VA School of Nursing Academic Partnership ;<br>Vanderlaan, Jennifer; University of Nevada Las Vegas, School of Nursing |
| Keywords:                     | Pain management < ANAESTHETICS, Maternal medicine < OBSTETRICS, PRIMARY CARE                                                                                                                                                                                                                                                                                        |
|                               |                                                                                                                                                                                                                                                                                                                                                                     |

SCHOLARONE™  
Manuscripts

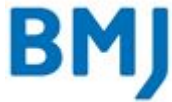

I, the Submitting Author has the right to grant and does grant on behalf of all authors of the Work (as defined in the below author licence), an exclusive licence and/or a non-exclusive licence for contributions from authors who are: i) UK Crown employees; ii) where BMJ has agreed a CC-BY licence shall apply, and/or iii) in accordance with the terms applicable for US Federal Government officers or employees acting as part of their official duties; on a worldwide, perpetual, irrevocable, royalty-free basis to BMJ Publishing Group Ltd ("BMJ") its licensees and where the relevant Journal is co-owned by BMJ to the co-owners of the Journal, to publish the Work in this journal and any other BMJ products and to exploit all rights, as set out in our [licence](#).

The Submitting Author accepts and understands that any supply made under these terms is made by BMJ to the Submitting Author unless you are acting as an employee on behalf of your employer or a postgraduate student of an affiliated institution which is paying any applicable article publishing charge ("APC") for Open Access articles. Where the Submitting Author wishes to make the Work available on an Open Access basis (and intends to pay the relevant APC), the terms of reuse of such Open Access shall be governed by a Creative Commons licence – details of these licences and which [Creative Commons](#) licence will apply to this Work are set out in our licence referred to above.

Other than as permitted in any relevant BMJ Author's Self Archiving Policies, I confirm this Work has not been accepted for publication elsewhere, is not being considered for publication elsewhere and does not duplicate material already published. I confirm all authors consent to publication of this Work and authorise the granting of this licence.

1  
2  
3 **A systematic review and meta-analysis to examine intrapartum interventions, and maternal and neonatal outcomes**  
4 **following immersion in water during labour and waterbirth**  
5  
6

7  
8 **Authors**  
9

10  
11 Ethel Burns\*

12  
13 Oxford Brookes University

14  
15 \*Corresponding author

16  
17  
18 Claire Feely

19  
20 Oxford Brookes University

21  
22  
23 Priscilla Hall, PhD, CNM

24  
25 Emory University School of Nursing

26  
27  
28  
29 Jennifer Vanderlaan, PhD, MPH, CNM

30  
31 University of Nevada Las Vegas School of Nursing  
32  
33  
34  
35  
36  
37  
38  
39  
40  
41  
42  
43  
44  
45  
46  
47  
48  
49  
50  
51  
52  
53  
54  
55  
56  
57  
58  
59  
60

## Abstract

**Objective:** To compare water immersion for labour and birth to standard care, accounting for differences in clinical practice experienced by women who use water and women who do not.

**Design:** Systematic Review and Meta-Analysis

**Setting:** Obstetric and midwifery-led settings

**Participants:** 36 papers reporting on outcomes for 153,236 participants

**Interventions:** Water immersion during labour and waterbirth

**Primary and secondary outcome measures:** Labour interventions included augmentation, opioids, epidural, episiotomy. Maternal outcomes included mode of birth, intact perineum, obstetric anal sphincter injury (OASI), pain, satisfaction, postpartum haemorrhage, infection, breastfeeding initiation. Newborn outcomes included APGAR score, resuscitation, respiratory distress, transient tachypnea, admission to a neonatal intensive care unit (NICU), infection.

**Results:** Use of epidural (OR 0.17 95% CI 0.05 – 0.56), injected opioids (OR 0.22 95% CI 0.13 – 0.38), episiotomy (OR 0.16; 95% CI 0.10 – 0.27), maternal pain, and postpartum hemorrhage (OR 0.69 95% CI 0.51 – 0.95) were significantly reduced with water immersion. Maternal satisfaction (OR 1.95 95% CI 1.28 – 2.96) and odds of an intact perineum (OR 1.48; 95% CI 1.21 – 1.79) were significantly increased with water immersion. Waterbirth was associated with increased odds of cord avulsion (OR 1.94 95% CI 1.30 – 2.88), although the absolute risk remained low (4.3 per 1,000 vs 1.3 per 1,000). There were no differences in any identified neonatal outcomes.

**Conclusions:** Water immersion during labour and waterbirth have clear benefits for healthy women and their newborns and reduce risk when conducted in the obstetric unit setting.

### Strengths and Limitations of the Study

- This study incorporated meta-regression, using covariates identified a priori, to identify sources of heterogeneity in previous studies.
- This study included cumulative meta-analysis and fail-safe analysis to provide estimates of the stability of the findings
- This meta-analysis was limited to studies published in any language if it could be translated into English using Google Translate, and published in 2000 or later.
- Few studies were conducted in midwifery-led settings.

For peer review only

## Introduction

Immersion in a birthing pool offers women a non-pharmacological option of pain relief during labour, which also enhances their sense of control. Resting and labouring in water can reduce fear, anxiety and pain perception; it helps optimise the physiology of childbirth through the release of endogenous endorphins and oxytocin.<sup>3</sup> Evidence from randomised controlled trials (RCTs) showed that labouring in water reduces the need for epidural analgesia whilst identifying no adverse maternal or neonatal effects.<sup>37</sup> In the UK, most birthing pool use occurs in midwifery-led birth settings: these include alongside midwifery units (co-located with a maternity hospital setting) and freestanding midwifery units (FMU) (in the community setting) and home birth.<sup>38</sup> The outcomes of birthing pool use may be different in midwifery-led settings compared to an obstetric setting because healthy women experience fewer interventions and operative birth when delivery occurs in a midwifery-led setting compared to an obstetric setting.<sup>38</sup>

Variations in care between waterbirth services may contribute to the differences in outcomes with water immersion, particularly variations in use of labour augmentation, hands on/off the perineum for delivery, pushing position, use of active management of third stage of labour, and placenta delivery in the water.<sup>39-45</sup> It is likely that woman who use water immersion for labour and birth experience different care practices than women who have standard delivery care. Though prior evidence has found no increased risk of adverse events for newborns born in water, heterogeneity in outcomes and limited reporting of the clinical guidance used for water immersion make implementation of evidence-based guidelines difficult.<sup>46-48</sup> There is a need to understand which clinical practices, when performed as part of water immersion care, result in the optimum outcomes for mother and newborn. It has been argued that an international RCT would be desirable.<sup>49,50</sup> However, a RCT proposal is likely to encounter ethical and recruitment challenges due to increasing acknowledgment of the importance of enabling women to take an active part in decision-making during labour. Additionally, an unblinded trial and expected uneven crossover carry an inevitable limitation.<sup>51</sup>

The objective of this systematic review was to compare water immersion for labour and birth to standard care, accounting for the differences in care practices experienced by women who use water and women who do not.

### Review questions

What interventions do women experience with water immersion for labour and birth?

What are the maternal and newborn outcomes following water immersion during labour and waterbirth compared with similar women who labour and/or give birth on land?

### Methods

A protocol for the review was published in the International Prospective Register of Systematic Reviews PROSPERO2019 CRD42019147001 prior to completion of the searches and updated in July 2020. The PRISMA 2020 guideline was followed for conducting this work.<sup>52</sup>

Eligibility criteria included:

- 1) Studies using any primary quantitative study design published in peer-reviewed journal or unpublished thesis.
- 2) Studies that examined maternal or neonatal interventions and/or outcomes when using the birthing pool for labour and/or delivery.
- 3) Studies published in 2000 or later.
- 4) Studies conducted in any language if it could be translated into English using Google Translate.

A search was conducted using CINAHL, Medline, Embase, BioMed Central (BMC) and PsycInfo during March 2020. A predesigned search strategy was designed using the PICOT/PEOT framework to develop search terms:<sup>53</sup>

- Population: women in labour and early postpartum
- Exposure: water immersion during labour and/or birth
- Comparison: no water immersion during labour or birth
- Outcomes: *Maternal*: artificial rupture of the membranes, need for labour augmentation, epidural analgesia, opioid injection, planned and actual place of birth, reason for transfer to an obstetric setting, mode of birth, perineal trauma, third stage management, postpartum haemorrhage/blood transfusion, infection, breastfeeding initiation. *Newborn*: APGAR score, resuscitation, admission to a neonatal intensive care unit (NICU), infection, breastfeeding at 6 weeks
- Time: labour and early puerperium



1  
2  
3 A tested, sensitive, and reproducible search strategy was developed with the specialist healthcare  
4 librarian, VF.<sup>54</sup> The refined search terms and strategy with Boolean operators are provided in Supplement 1.  
5 These were adapted for specific database architecture. Additional searches were carried out via referencing,  
6 checking all included studies with no further records found. Publication alerts were set up via BMC updates that  
7 alerted CF<sub>1</sub> to a new publication that met our inclusion/exclusion criteria. A final search to determine if any  
8 additional papers were published after analysis was conducted by VF in May 2021.  
9  
10  
11  
12  
13  
14

### 15 *Study selection*

16  
17 Records were de-duplicated in Zotero and collated into Rayyan systematic review software.<sup>55</sup> Initial  
18 screening (title/abstract) was carried out blind by HTC, CF<sub>1</sub>, CF<sub>2</sub> against the inclusion/exclusion criteria.  
19  
20 Consensus meetings were held to discuss and resolve disagreements. Full text screening was carried out  
21 independently against the inclusion/exclusions criteria and in pairs: JV and CF<sub>1</sub>, EB and PH. Disagreements were  
22 resolved by consensus meeting. In the case of duplication of a sample across multiple papers, the paper which  
23 provided the largest sample for each outcome provided the data for synthesis.  
24  
25  
26  
27  
28  
29

### 30 *Data Collection Process & Data Items*

31  
32 Data collection was completed using pilot tested forms created in REDCap data collection software.  
33  
34 Researchers worked in teams of two (JV and EB, JV and PH) to individually abstract data for each study, identify  
35 discrepancies, and reach consensus when needed. Data collected included the study type; sample characteristics,  
36 care practices for water immersion, if it was a midwifery-led setting; rates of interventions including amniotomy,  
37 labour induction, augmentation, fetal monitoring, epidural, injected opioid, episiotomy, and active management of  
38 third stage; and outcome data including mode of delivery, level of pain, maternal satisfaction, intact perineum,  
39 obstetric anal sphincter injury, shoulder dystocia, maternal infection defined by symptoms and positive test,  
40 primary postpartum haemorrhage, manual removal of the placenta, 5-minute APGAR, newborn resuscitation,  
41 transient tachypnoea of the newborn, respiratory distress of the newborn, neonatal intensive unit admission within  
42 the first 24 hours and lasting for 48 hours, death in neonatal period, newborn infection defined by both symptoms  
43 and positive test, cord avulsion, and breastfeeding initiation.  
44  
45  
46  
47  
48  
49  
50  
51  
52  
53  
54  
55  
56  
57  
58  
59  
60

### *Risk of bias assessment*

Risk of bias assessment included review of 7 domains based on the Robbins-I Risk of Bias Tool.<sup>56</sup> The domains included bias due to confounding, bias in selection of participants, bias in measurement of intervention, bias due to departures of intended treatment, bias in measurement of outcomes, bias due to missing data, bias in selection of reported results. Bias due to departure of intended treatment was modified to track studies that did not provide information about water immersion use for the control group. Risk of bias assessment was completed independently by two researchers (JV and EB, JV and PH). Disagreements were resolved by consensus meeting.

### *Summary Measures & Synthesis of Results*

All outcomes were summarised using an odds ratio (OR) and 95% confidence interval (CI). All calculations were conducted in Comprehensive Meta-Analysis Version 3, using the inverse variance method.<sup>57</sup> Results of individual studies were converted to log odds ratio and standard error for synthesis. Fixed effects models were used when  $I^2$  was less than 50%, otherwise random effects models were used. When possible, subgroup analysis was conducted to determine effect of the birth setting and parity on the estimate. In addition, analysis limited to studies published within the past 10 years was conducted when possible. Per protocol, we intended to conduct subgroup analysis by maternal age, maternal BMI, prior cesarean, and pool type, however the data did not allow for these analyses. Cumulative meta-analysis was used to identify the stability of the estimates over time.<sup>58</sup> The fail-safe N estimates was calculated to determine the number of studies necessary to change the estimates.<sup>59</sup> Forest plots were created in RevMan v5.4.1.<sup>60</sup>

### *Additional Analyses*

Begg's Test and Egger's Regression Risk assessed risk of bias across studies.<sup>61</sup> Trim & Fill analysis was used to estimate the magnitude of effect of the bias.<sup>62</sup> Meta-regression was completed when at least ten studies provided data for an outcome when  $I^2 > 50\%$ .<sup>63,64</sup> Tested covariates included the sample characteristics and care practices identified a priori as the structure and process variables likely to be responsible for heterogeneity in the outcomes. Directed acyclic graphs (DAG) of the covariates and their role are available in Supplement 2.<sup>65</sup> For continuous covariates, the rate of a covariate (e.g. the induction rate in the sample) were used for regression.

1  
2  
3 Categorical covariates were coded as dichotomous (e.g. described appropriate birth pool or did not describe the  
4 immersion receptacle).

#### 7 *Patient and Public Involvement*

8  
9 No patient involved.

## 11 **Results**

### 12 *Study Selection*

13  
14 The searches generated 2,113 hits, reduced to 1,667 after duplicates were removed; n=1,561 records were  
15 discarded at the initial screening stage. Of 106 records that were full-text screened, n=71 records did not meet the  
16 criteria. See Supplement 3 for the list of excluded studies and the reasons. One additional study was found via  
17 BMC updates, therefore, k=36 papers reporting on outcomes for 153,236 women were included into the review.

18  
19 Figure 1 PRISMA diagram illustrates the study selection process.<sup>52</sup>

20  
21  
22  
23  
24  
25 [Figure 1 here]

### 26 27 28 29 *Study Description*

30  
31 Most studies (k=32) were conducted in an obstetric setting or did not adequately report the setting, while  
32 four studies were conducted in midwife-led settings; two included planned home and birth centre births 4, 29, one  
33 that involved a birth centre (not explicitly described as freestanding) and an alongside midwifery unit (co-located  
34 in an obstetric unit) 32. Studies included randomised controlled trials (k=7; n=2,666), prospective studies (k=13;  
35 n=30,085), retrospective studies (k=15; 120,474), and one pre-post study (n=11). Studies reported on waterbirth  
36 (k=25; n=146,499), water immersion for labour (k=7; 1,901), both (k=3; 4,621) and one whose timing of  
37 immersion could not be determined (n=215). Full information is available in Table 1.

Table 1: Characteristics of included studies; Meta-analysis of water immersion for Labour and delivery

| Author                | Study Type | Setting   | Immersion Exposure <sup>a</sup> | Sample Size | Interventions and Outcomes Reported |
|-----------------------|------------|-----------|---------------------------------|-------------|-------------------------------------|
| Bailey, 2019          | RCT        | Obstetric | Waterbirth                      | 794         | 1, 5, 10, 11, 13, 17                |
| Barry, 2020           | PO         | Obstetric | Both                            | 367         | 8, 10, 11, 13, 17, 23               |
| Benfield, 2010        | Pre-Post   | Obstetric | Labour                          | 11          | 4, 7                                |
| Bovbjerg, 2016        | RO         | Midwifery | Waterbirth                      | 16,773      | 10, 11, 12, 17, 21                  |
| Cluett, 2004          | RCT        | Obstetric | Labour                          | 99          | 2, 6, 7, 8, 15, 16                  |
| da Silva, 2009        | RCT        | Obstetric | Labour                          | 108         | 2, 4, 7, 10, 12, 17                 |
| Eckert, 2001          | RCT        | Obstetric | Labour                          | 274         | 1, 5, 6, 7, 8, 11, 12, 16, 17, 18   |
| Geisbuehler, 2002     | PO         | Obstetric | Waterbirth                      | 5584        | 12, 20                              |
| Geissbuehler, 2004    | PO         | Obstetric | Waterbirth                      | 9518        | 5, 9, 10, 11, 13, 15, 17            |
| Geissbuehler, 2000    | PO         | Obstetric | Waterbirth                      | 8434        | 6, 16                               |
| Haslinger, 2015       | RO         | Obstetric | Waterbirth                      | 5319        | 11, 12                              |
| Henderson, 2014       | PO         | Obstetric | Both                            | 4024        | 2, 3, 8, 10, 12, 13, 14, 18         |
| Hodgson, 2020         | RO         | Obstetric | Waterbirth                      | 25,768      | 4, 11, 17, 18                       |
| Jacoby, 2019          | RO         | Obstetric | Waterbirth                      | 23,036      | 11, 13, 15, 17, 18, 20, 21, 23      |
| Lathrop, 2018         | PO         | Obstetric | Waterbirth                      | 198         | 13, 16                              |
| Lim, 2016             | RO         | Obstetric | Waterbirth                      | 236         | 4, 9, 10, 12, 13, 14, 17, 19        |
| Liu, 2014             | PO         | Obstetric | Labour                          | 108         | 4, 7, 8, 13                         |
| Mallen-Perez, 2018    | PO         | Obstetric | Unclear                         | 215         | 7                                   |
| Menakaya, 2013        | RO         | Obstetric | Waterbirth                      | 438         | 9, 10, 11, 12, 13, 17, 18           |
| Mollamahmutoglu, 2012 | PO         | Obstetric | Waterbirth                      | 602         | 1, 7, 10, 12, 13                    |
| Neiman, 2020          | RO         | Obstetric | Both                            | 230         | 4, 8, 9, 10, 12, 13, 17, 22, 23     |
| Ohlsson, 2001         | RCT        | Obstetric | Labour                          | 1237        | 6, 8, 11, 14, 19, 20                |
| Otigbah, 2000         | RO         | Obstetric | Waterbirth                      | 602         | 1, 4, 5, 9, 10, 11, 12, 13          |
| Pagano, 2010          | RO         | Obstetric | Waterbirth                      | 220         | 10, 17                              |
| Peacock, 2018         | RO         | Obstetric | Waterbirth                      | 3507        | 17                                  |
| Preston, 2019         | RO         | Obstetric | Waterbirth                      | 15734       | 5, 9, 11                            |
| Ros, 2009             | PO         | Obstetric | Waterbirth                      | 54          | 17                                  |

1  
2  
3  
4  
5  
6  
7  
8  
9  
10  
11  
12  
13  
14  
15  
16  
17  
18  
19  
20  
21  
22  
23  
24  
25  
26  
27  
28  
29  
30  
31  
32  
33  
34  
35  
36  
37  
38  
39  
40  
41  
42  
43  
44  
45  
46  
47

|                          |     |           |            |        |                                                   |
|--------------------------|-----|-----------|------------|--------|---------------------------------------------------|
| Sert, 2019               | RCT | Obstetric | Labour     | 64     | 17                                                |
| Snapp, 2019              | RO  | Midwifery | Waterbirth | 26,684 | 9, 10, 13, 17, 21, 23                             |
| Thoeni, 2005             | RO  | Obstetric | Waterbirth | 1,144  | 10, 11, 12                                        |
| Torkamani, 2010          | PO  | Obstetric | Waterbirth | 100    | 5, 7, 12                                          |
| Ulfsdottir, 2018         | RO  | Midwifery | Waterbirth | 612    | 1, 2, 3, 4, 6, 10, 11, 12, 13, 14, 16, 17, 23, 24 |
| Woodward, 2004           | RCT | Obstetric | Waterbirth | 90     | 4, 5, 6, 8, 10, 17, 24                            |
| Zanetti-Dallenbach, 2006 | PO  | Obstetric | Waterbirth | 513    | 2, 3, 6, 9, 12                                    |
| Zanetti-Dallenbach, 2007 | PO  | Obstetric | Waterbirth | 368    | 4, 5, 10, 11, 13, 14, 17                          |
| Ziolkowski, 2009         | RO  | Obstetric | Waterbirth | 171    | 16, 17                                            |

Study Type Key: RCT, Randomized Controlled Trial; PO, Prospective Observational; RO, Retrospective Observational  
 Interventions & Outcomes Key: 1) Labour Induction 2) Amniotomy 3) Augmentation 4) Fetal Monitoring 5) Opioids 6) Epidural 7) Pain 8) Cesarean Delivery 9) Shoulder Dystocia 10) Intact Perineum 11) OASI 12) Episiotomy 13) Postpartum Hemorrhage 14) Manual Removal of Placenta 15)

Peer review only

1  
2  
3  
4  
5 Few studies provided sample characteristics beyond parity (See Table 2). Eleven studies reported the  
6  
7 sample was restricted to persons in spontaneous labor while seven included the rate of labour induction for each  
8  
9 group. Two studies excluded participation based on BMI while six provided weight or BMI distributions in the  
10  
11 sample characteristics. Most studies (k=19) excluded multiple pregnancies, the rest did not address this  
12  
13 characteristic. Prior caesarean was excluded by seven studies and reported as a sample characteristic for five  
14  
15 studies.  
16  
17  
18  
19  
20  
21  
22  
23  
24  
25  
26  
27  
28  
29  
30  
31  
32  
33  
34  
35  
36  
37  
38  
39  
40  
41  
42  
43  
44  
45  
46  
47  
48  
49  
50  
51  
52  
53  
54  
55  
56  
57  
58  
59  
60

For peer review only

Table 2: Reported characteristics of study samples abstracted from inclusion and exclusion criteria or sample descriptions

| <b>Author</b>         | <b>Excludes Multiparous</b> | <b>Excludes Induced Labour</b> | <b>Excludes for BMI</b> | <b>Excludes Multiples</b> | <b>Excludes Prior Caesarean</b> |
|-----------------------|-----------------------------|--------------------------------|-------------------------|---------------------------|---------------------------------|
| Bailey, 2019          | Yes                         | No                             | No                      | Yes                       | No                              |
| Barry, 2020           | Yes                         | Yes                            | >30                     | Yes                       | n.d.                            |
| Benfield, 2010        | Yes                         | n.d.                           | n.d.                    | n.d.                      | n.d.                            |
| Bovbjerg, 2016        | Yes                         | n.d.                           | n.d.                    | Yes                       | No                              |
| Cluett, 2004          | Yes                         | Yes                            | n.d.                    | n.d.                      | n.d.                            |
| da Silva, 2009        | Yes                         | n.d.                           | n.d.                    | Yes                       | n.d.                            |
| Eckert, 2001          | Yes                         | No                             | n.d.                    | Yes                       | n.d.                            |
| Geisbuehler, 2002     | Yes                         | n.d.                           | n.d.                    | n.d.                      | n.d.                            |
| Geissbuehler, 2004    | Yes                         | n.d.                           | >40                     | n.d.                      | n.d.                            |
| Geissbuhler, 2000     | Yes                         | n.d.                           | n.d.                    | n.d.                      | n.d.                            |
| Haslinger, 2015       | Yes                         | n.d.                           | n.d.                    | Yes                       | n.d.                            |
| Henderson, 2014       | Yes                         | No                             | n.d.                    | n.d.                      | No                              |
| Hodgson, 2020         | Yes                         | n.d.                           | n.d.                    | Yes                       | n.d.                            |
| Jacoby, 2019          | Yes                         | Yes                            | n.d.                    | Yes                       | n.d.                            |
| Lathrop, 2018         | Yes                         | n.d.                           | n.d.                    | Yes                       | n.d.                            |
| Lim, 2016             | Yes                         | n.d.                           | n.d.                    | Yes                       | No                              |
| Liu, 2014             | No                          | n.d.                           | No                      | Yes                       | Yes                             |
| Mallen-Perez, 2018    | Yes                         | Yes                            | No                      | Yes                       | n.d.                            |
| Menakaya, 2013        | Yes                         | Yes                            | n.d.                    | Yes                       | n.d.                            |
| Mollamahmutoglu, 2012 | Yes                         | No                             | No                      | n.d.                      | Yes                             |
| Neiman, 2020          | Yes                         | Yes                            | n.d.                    | Yes                       | Yes                             |
| Ohlsson, 2001         | Yes                         | n.d.                           | n.d.                    | Yes                       | n.d.                            |
| Otigbah, 2000         | Yes                         | No                             | n.d.                    | n.d.                      | n.d.                            |
| Pagano, 2010          | Yes                         | n.d.                           | n.d.                    | n.d.                      | n.d.                            |
| Peacock, 2018         | Yes                         | Yes                            | n.d.                    | n.d.                      | n.d.                            |
| Preston, 2019         | Yes                         | Yes                            | No                      | n.d.                      | n.d.                            |
| Ros, 2009             | Yes                         | n.d.                           | n.d.                    | Yes                       | Yes                             |

|                          |     |      |      |      |      |
|--------------------------|-----|------|------|------|------|
| Sert, 2019               | Yes | Yes  | n.d. | n.d. | Yes  |
| Snapp, 2019              | Yes | n.d. | n.d. | n.d. | n.d. |
| Thoeni, 2005             | No  | n.d. | n.d. | Yes  | Yes  |
| Torkamani, 2010          | Yes | n.d. | n.d. | n.d. | n.d. |
| Ulfsdottir, 2018         | Yes | Yes  | No   | n.d. | No   |
| Woodward, 2004           | Yes | Yes  | n.d. | n.d. | Yes  |
| Zanetti-Dallenbach, 2006 | Yes | n.d. | n.d. | Yes  | n.d. |
| Zanetti-Dallenbach, 2007 | Yes | n.d. | n.d. | Yes  | n.d. |
| Ziolkowski, 2009         | No  | n.d. | n.d. | n.d. | n.d. |

n.d. This item was not described in the paper; it was neither listed as an inclusion/exclusion criteria nor in the description of the sample.



1  
2  
3  
4  
5 Few studies provided descriptions of the care practices used with water immersion and water birth (See  
6 Table 3). The description of the immersion receptacle used was adequate to determine the woman had freedom of  
7 movement in seven studies. Method of induction was not reported. Sixteen studies reported a fetal heart  
8 monitoring method as either intermittent auscultation (k=10), continuous monitoring (k=5) or a mix of methods  
9 (k=1). Six studies reported using “hands-off” (k=4) or “hands-on” (k=2) the perineum. Third stage management  
10 was reported by six studies, all indicating that active management was used. Three studies indicated whether the  
11 placenta and membranes were delivered in the birth pool (k=1) or out of the birth pool (k=2).  
12  
13  
14  
15  
16  
17  
18  
19  
20  
21  
22  
23  
24  
25  
26  
27  
28  
29  
30  
31  
32  
33  
34  
35  
36  
37  
38  
39  
40  
41  
42  
43  
44  
45  
46  
47  
48  
49  
50  
51  
52  
53  
54  
55  
56  
57  
58  
59  
60

Table 3: Description of care practices reported in included studies

| <b>Author</b>         | <b>Appropriate Pool Described</b> | <b>Induction Method</b> | <b>Intermittent Auscultation</b> | <b>Perineum Method</b> | <b>3<sup>rd</sup> Stage Management</b> | <b>Placenta &amp; Membranes</b> |
|-----------------------|-----------------------------------|-------------------------|----------------------------------|------------------------|----------------------------------------|---------------------------------|
| Bailey, 2019          | No                                | n.d.                    | n.d.                             | n.d.                   | Active                                 | Out of Pool                     |
| Barry, 2020           | Yes                               | None                    | Mixed                            | Hands Off              | Active                                 | n.d.                            |
| Benfield, 2010        | No                                | n.d.                    | No                               | n.d.                   | n.d.                                   | n.d.                            |
| Bovbjerg, 2016        | No                                | n.d.                    | n.d.                             | n.d.                   | n.d.                                   | n.d.                            |
| Cluett, 2004          | Yes                               | None                    | n.d.                             | n.d.                   | n.d.                                   | n.d.                            |
| da Silva, 2009        | No                                | n.d.                    | No                               | n.d.                   | n.d.                                   | n.d.                            |
| Eckert, 2001          | Yes                               | n.d.                    | n.d.                             | n.d.                   | n.d.                                   | n.d.                            |
| Geissbuehler, 2002    | No                                | n.d.                    | Yes                              | n.d.                   | n.d.                                   | n.d.                            |
| Geissbuehler, 2004    | No                                | n.d.                    | Yes                              | n.d.                   | n.d.                                   | n.d.                            |
| Geissbuehler, 2000    | No                                | n.d.                    | Yes                              | n.d.                   | n.d.                                   | n.d.                            |
| Haslinger, 2015       | No                                | n.d.                    | n.d.                             | Hands On               | n.d.                                   | n.d.                            |
| Henderson, 2014       | No                                | n.d.                    | n.d.                             | Hands Off              | Active                                 | n.d.                            |
| Hodgson, 2020         | No                                | n.d.                    | Yes                              | n.d.                   | n.d.                                   | n.d.                            |
| Jacoby, 2019          | No                                | None                    | n.d.                             | n.d.                   | n.d.                                   | n.d.                            |
| Lathrop, 2018         | No                                | n.d.                    | n.d.                             | n.d.                   | n.d.                                   | n.d.                            |
| Lim, 2016             | No                                | n.d.                    | No                               | n.d.                   | n.d.                                   | n.d.                            |
| Liu, 2014             | No                                | n.d.                    | Yes                              | n.d.                   | n.d.                                   | n.d.                            |
| Mallen-Perez, 2018    | Yes                               | None                    | n.d.                             | n.d.                   | n.d.                                   | n.d.                            |
| Menakaya, 2013        | Yes                               | None                    | n.d.                             | n.d.                   | n.d.                                   | n.d.                            |
| Mollamahmutoglu, 2012 | Yes                               | n.d.                    | Yes                              | Hands Off              | Active                                 | n.d.                            |
| Neiman, 2020          | No                                | None                    | Yes                              | n.d.                   | n.d.                                   | n.d.                            |
| Ohlsson, 2001         | No                                | n.d.                    | n.d.                             | n.d.                   | n.d.                                   | n.d.                            |
| Otigbah, 2000         | Yes                               | n.d.                    | Yes                              | Hands Off              | Active                                 | Out of Pool                     |
| Pagano, 2010          | No                                | n.d.                    | n.d.                             | n.d.                   | n.d.                                   | n.d.                            |
| Peacock, 2018         | No                                | None                    | n.d.                             | n.d.                   | n.d.                                   | n.d.                            |
| Preston, 2019         | No                                | None                    | n.d.                             | n.d.                   | n.d.                                   | n.d.                            |
| Ros, 2009             | No                                | n.d.                    | n.d.                             | n.d.                   | n.d.                                   | n.d.                            |

1  
2  
3  
4  
5  
6  
7  
8  
9  
10  
11  
12  
13  
14  
15  
16  
17  
18  
19  
20  
21  
22  
23  
24  
25  
26  
27  
28  
29  
30  
31  
32  
33  
34  
35  
36  
37  
38  
39  
40  
41  
42  
43  
44  
45  
46  
47

|                          |     |      |      |          |        |         |
|--------------------------|-----|------|------|----------|--------|---------|
| Sert, 2019               | Yes | None | n.d. | n.d.     | n.d.   | n.d.    |
| Snapp, 2019              | No  | n.d. | n.d. | n.d.     | n.d.   | n.d.    |
| Thoeni, 2005             | No  | n.d. | n.d. | Hands On | n.d.   | n.d.    |
| Torkamani, 2010          | No  | n.d. | n.d. | n.d.     | n.d.   | n.d.    |
| Ulfsdottir, 2018         | Yes | None | No   | n.d.     | n.d.   | n.d.    |
| Woodward, 2004           | No  | None | Yes  | n.d.     | n.d.   | n.d.    |
| Zanetti-Dallenbach, 2006 | No  | n.d. | No   | n.d.     | Active | In Pool |
| Zanetti-Dallenbach, 2007 | No  | n.d. | No   | n.d.     | n.d.   | n.d.    |
| Ziolkowski, 2009         | No  | n.d. | Yes  | n.d.     | n.d.   | n.d.    |

n.d. Care practice not described in the paper in methods or results.

BMJ peer review only

### *Risk of Bias Assessment*

Overall risk of bias is presented in Figure 2. Domain 3, bias due to comparability of the groups, was most often identified in retrospective studies that did not provide adequate sample restriction to ensure comparability. Domain 4, bias due to departure from intended treatment, had the highest potential for bias because studies did not provide information about if or why the comparison group included persons who used water in labour but not during delivery. Bias in measurement of outcomes was rare because most outcomes were standard medical record items. However, measurement for pain and maternal satisfaction was not consistently described. Individual study results and risk of bias for each outcome are provided in the forest plots found in Figures 3-24.

[Figure 2]

**Labour Induction.** Three studies provided data on labour induction (n=2,008), all conducted after 2010. Overall, this analysis found no difference between use of labour induction with water immersion and standard care (OR 0.43; 95% CI 0.16 – 1.16; random effects; Q=20.75 p<.001; I<sup>2</sup>=90%). Subgroup analysis of studies reporting in an obstetric setting remained no difference. Results of the subgroup analyses are in Table 4. Three studies were too few for cumulative meta-analysis. Two additional studies indicated there was no difference but did not provide data to synthesise.<sup>7,23</sup>

[Figure 3]

Table 4: Results of subgroup analysis of interventions on outcomes of water immersion for Labour and delivery compared to standard care.

| Outcome                             | Studies | Sample                                   | Effect OR (95% CI) Model             | Heterogeneity Q (p) I <sup>2</sup> % |
|-------------------------------------|---------|------------------------------------------|--------------------------------------|--------------------------------------|
| <b>Labour Induction<sup>a</sup></b> |         |                                          |                                      |                                      |
| Obstetric Units                     | 2       | 604 Immersion<br>792 Standard Care       | 0.32 (0.06 – 1.58)<br>Random Effects | 18 (<.01)<br>94%                     |
| <b>Amniotomy<sup>a</sup></b>        |         |                                          |                                      |                                      |
| Obstetric Units                     | 4       | 306 Immersion<br>709 Standard Care       | 0.95 (0.62 – 1.46)<br>Random Effects | 5 (.17)<br>40%                       |
| 2011 and Later                      | 2       | 420 Immersion<br>765 Standard care       | 0.56 (0.15 – 2.02)<br>Random Effects | 14 (<.01)<br>93%                     |
| <b>Augmentation<sup>a</sup></b>     |         |                                          |                                      |                                      |
| Obstetric Units                     | 2       | 203 Immersion<br>605 Standard Care       | 0.48 (0.16 – 1.51)<br>Random Effects | 6 (.02)<br>83%                       |
| 2011 and Later                      | 2       | 420 Immersion<br>765 Standard care       | 0.32 (0.05 – 2.24)<br>Random Effects | 19 (<.01)<br>95%                     |
| <b>Opioid Use</b>                   |         |                                          |                                      |                                      |
| 2011 and Later                      | 2       | 1,641 Immersion<br>14,887 Standard care  | 0.17 (0.15 – 0.20)<br>Fixed Effects  | 0 (.54)<br>0%                        |
| <b>Epidural<sup>a</sup></b>         |         |                                          |                                      |                                      |
| Obstetric Units                     | 6       | 4,104 Immersion<br>6,889 Standard Care   | 0.26 (0.08 – 0.83)<br>Random Effects | 89 (<.01)<br>94%                     |
| <b>Pain</b>                         |         |                                          |                                      |                                      |
| 2011 and Later                      | 5       | 417 Immersion<br>413 Standard Care       | 0.15 (0.06 – 0.42)<br>Random Effects | 48 (<.01)<br>92%                     |
| <b>Caesarean Delivery</b>           |         |                                          |                                      |                                      |
| 2011 and Later                      | 4       | 400 Immersion<br>830 Standard Care       | 0.84 (0.32 – 2.23)<br>Fixed Effects  | 6 (.12)<br>48%                       |
| <b>Shoulder Dystocia</b>            |         |                                          |                                      |                                      |
| Obstetric Units                     | 6       | 5,528 Immersion<br>21,155 Standard Care  | 1.06 (0.64 – 1.74)<br>Fixed Effects  | 4 (.60)<br>0%                        |
| 2011 and Later                      | 4       | 11,773 Immersion<br>31,252 Standard Care | 0.87 (0.33 – 2.26)<br>Random Effects | 11 (.01)<br>73%                      |
| <b>Intact Perineum</b>              |         |                                          |                                      |                                      |
| Obstetric Units                     | 14      | 6,170 Immersion<br>8,866 Standard care   | 1.55 (1.12 – 2.16)<br>Random Effects | 147 (<.01)<br>91%                    |
| Midwifery-led Units                 | 3       | 17,079 Immersion<br>23,249 Standard care | 1.07 (0.91 – 1.26)<br>Random Effects | 15 (<.01)<br>87%                     |
| Nulliparas                          | 5       | 1,065 Immersion<br>894 Standard care     | 1.59 (1.01 – 2.50)<br>Random Effects | 12 (.01)<br>68%                      |
| Waterbirth vs No Water              | 8       | 954 Immersion<br>1696 Standard care      | 1.35 (0.67 – 2.72)<br>Random Effects | 83 (<.01)<br>92%                     |
| 2011 and Later                      | 10      | 18,292 Immersion<br>28,871 Standard Care | 1.59 (1.22 – 2.07)<br>Random Effects | 156 (<.01)<br>94%                    |
| <b>OASI</b>                         |         |                                          |                                      |                                      |
| Obstetric Units                     | 13      | 10,720 Immersion<br>57,870 Standard care | 0.85 (0.57 – 1.30)<br>Random Effects | 51 (<.001))<br>77%                   |

|                                   |    |                                          |                                      |                    |
|-----------------------------------|----|------------------------------------------|--------------------------------------|--------------------|
| Midwifery-led Units               | 2  | 6,827 Immersion<br>10,558 Standard care  | 0.71 (0.47 – 1.08)<br>Fixed Effects  | 0 (.527)<br>0%     |
| Nulliparas                        | 2  | 870 Immersion<br>540 Standard care       | 1.25 (0.42 – 3.71)<br>Fixed Effects  | 1 (.385)<br>0%     |
| Waterbirth vs No Water            | 3  | 408 Immersion<br>550 Standard care       | 0.57 (0.19 – 1.69)<br>Fixed Effects  | 1 (.681)<br>0%     |
| 2011 and Later                    | 9  | 13,298 Immersion<br>67,382 Standard Care | 0.78 (0.48 – 1.28)<br>Random Effects | 42 (<.01)<br>81%   |
| <b>Episiotomy<sup>a</sup></b>     |    |                                          |                                      |                    |
| Obstetric Units                   | 14 | 6177 Immersion<br>13,548 Standard care   | 0.17 (0.11 – 0.28)<br>Random Effects | 109 (<.001)<br>88% |
| Nulliparas                        | 3  | 886 Immersion<br>582 Standard care       | 0.10 (0.02 – 0.60)<br>Random Effects | 14 (<.001)<br>86%  |
| Waterbirth vs No Water            | 5  | 691 Immersion<br>1022 Standard care      | 0.63 (0.02 – 0.20)<br>Random Effects | 14 (.008)<br>71%   |
| 2011 and Later                    | 8  | 7,831 Immersion<br>16,888 Standard Care  | 0.09 (0.03 – 0.25)<br>Random Effects | 53 (<.01)<br>87%   |
| <b>Postpartum Hemorrhage</b>      |    |                                          |                                      |                    |
| Obstetric Units                   | 13 | 7,040 Immersion<br>29,555 Standard care  | 0.75 (0.60 – 0.94)<br>Random Effects | 30 (.002)<br>60%   |
| Midwifery-led Units               | 2  | 10,558 Immersion<br>16,738 Standard care | 0.39 (0.08 – 1.86)<br>Random Effects | 56 (<.001)<br>98%  |
| Waterbirth vs No Water            | 5  | 758 Immersion<br>1,177 Standard care     | 1.02 (0.76 – 1.36)<br>Fixed Effects  | 4 (.439)<br>0%     |
| 2011 and Later                    | 12 | 13,591 Immersion<br>39,945 Standard Care | 0.76 (0.48 – 1.20)<br>Random Effects | 97 (<.01)<br>89%   |
| <b>Manual Removal of Placenta</b> |    |                                          |                                      |                    |
| Obstetric Units                   | 4  | 1,239 Immersion<br>1,654 Standard care   | 0.78 (0.37 – 1.64)<br>Fixed Effects  | 6 (.105)<br>51%    |
| 2011 and Later                    | 3  | 538 Immersion<br>883 Standard Care       | 1.48 (0.50 – 4.38)<br>Fixed Effects  | 4 (.16)<br>45%     |
| <b>Maternal Satisfaction</b>      |    |                                          |                                      |                    |
| Obstetric Units                   | 5  | 1,802 Immersion<br>1,568 Standard care   | 2.02 (1.28 – 3.19)<br>Random Effects | 24 (<.01)<br>83%   |
| 2011 and Later                    | 2  | 372 Immersion<br>438 Standard Care       | 2.55 (1.54 – 4.23)<br>Random Effects | 2 (.16)<br>50%     |
| <b>APGAR</b>                      |    |                                          |                                      |                    |
| Obstetric Units                   | 18 | 10,286 Immersion<br>54,361 Standard care | 0.85 (0.66 – 1.08)<br>Random Effects | 29 (.047)<br>38%   |
| Midwifery-led Units               | 3  | 17,092 Immersion<br>18,31 Standard care  | 0.33 (0.07 – 1.54)<br>Random Effects | 57 (<.001)<br>96%  |
| Waterbirth vs No Water            | 6  | 614 Immersion<br>655 Standard care       | 1.07 (0.76 – 1.51)<br>Fixed Effects  | 3 (.643)<br>0%     |
| 2011 and Later                    | 12 | 21,931 Immersion<br>65,781 Standard care | 0.52 (0.25 – 1.05)<br>Random Effects | 101 (<.001)<br>89% |
| <b>Neonatal Death</b>             |    |                                          |                                      |                    |
| Midwifery-led units               | 2  | 16,786 Immersion<br>26,722 Standard care | 0.91 (0.61 – 1.34)<br>Fixed Effects  | 1 (.297)<br>8%     |
| <b>Cord Avulsion</b>              |    |                                          |                                      |                    |
| Obstetric Units                   | 3  | 1,874 Immersion                          | 2.18 (0.34 – 11.97)                  | 1 (.757)           |

|                     |   |                                          |                                     |                |
|---------------------|---|------------------------------------------|-------------------------------------|----------------|
|                     |   | 21,621 Standard care                     | Fixed Effects                       | 0%             |
| Midwifery-led Units | 2 | 10,649 Immersion<br>16,829 Standard care | 1.92 (1.28 – 2.89)<br>Fixed Effects | 1 (.386)<br>0% |

- a. Random Effects models were used for intervention (Labour induction, amniotomy, augmentation, epidural, and episiotomy) models because variation in use of these procedures is dependent on practice habits of the provider which are not otherwise controlled.

**Amniotomy.** Five studies provided data on amniotomy (n=1,627). Overall, this analysis found no difference (OR 0.72 ; 95% CI 0.37 – 1.41; random effects; Q=25 p<.001; I<sup>2</sup>=84%). Cumulative meta-analysis indicated the available evidence has consistently indicated no difference in the rate of amniotomy. Subgroup analysis of studies reporting in an obstetric setting and the most recent studies remained no difference.

[Figure 4]

**Augmentation.** Three studies provided data to compare augmentation of labour (n=2,230). This analysis favoured water immersion (OR 0.30; 95% CI 0.10 – 0.92; random effects; Q=20 p<.001; I<sup>2</sup>=89%). Subgroup analysis of studies reporting in an obstetric setting and the most recent studies remained no difference. Fail-safe analysis estimated 34 additional studies finding no difference would be needed to change the estimate to no difference. Three studies were too few for cumulative meta-analysis.

[Figure 5]

**Fetal Monitoring.** No studies provided data to compare the use of intermittent or continuous fetal monitoring during immersion to standard care.

**Opioid Use.** Eight studies provided data on opioid use (n=27,391), all were conducted in an obstetric setting. Overall, this analysis found reduced use of opioids with water immersion (OR 0.22 95% CI 0.13 – 0.38; random effects; Q=107 p<.001; I<sup>2</sup>=93%). Subgroup analysis of the most recent studies remained no difference. Cumulative meta-analysis indicated the available evidence consistently favoured water immersion. Fail-safe analysis estimated 972 additional studies would be needed to change the estimate to no difference.

[Figure 6]

1  
2  
3  
4  
5 **Epidural use.** Seven studies provided data on epidural use (n=12,055). Overall, this analysis favoured  
6 water immersion (OR 0.17 95% CI 0.05 – 0.56; random effects; Q=104 p<.001; I<sup>2</sup>=94%). Cumulative meta-  
7 analysis revealed the estimate moved from no difference to favour water immersion in 2007. Fail-safe analysis  
8 indicated 100 additional studies would be needed to change the estimate to no difference. Subgroup analysis  
9 revealed the use of epidural was reduced with water immersion in an obstetric setting.  
10  
11  
12  
13  
14  
15

16  
17  
18 [Figure 7]  
19  
20

21 **Pain.** Eight studies provided data for analysis of pain (n=1,200), all were conducted in an obstetric  
22 setting. Because these studies varied in their measurement timing and scale, they were combined with a random  
23 effects model for an overall score and the results were stratified by timing of measurement in the forest plot.  
24 Overall, the results indicated reduced pain with water immersion (OR 0.23 95% CI 0.12 – 0.51; random effects;  
25 Q=76.7 p<.001; I<sup>2</sup>=91%). One additional study reported in favour of water immersion but did not provide the data  
26 in a way that allowed synthesis.<sup>31</sup> Subgroup analysis of the most recent studies indicated reduced reports of pain  
27 with water immersion. Cumulative meta-analysis indicated the available evidence moved from no difference to  
28 favour water immersion in 2009 and has been stable since. Fail-safe analysis estimated 279 studies finding no  
29 difference would be necessary to change the estimate from favouring water to no difference.  
30  
31  
32  
33  
34  
35  
36  
37  
38  
39

40 [Figure 8]  
41  
42  
43

44 **Caesarean Delivery.** Eight studies provided data on mode of birth comparing water immersion (n=1190)  
45 vs standard care (n=1575), all were conducted in an obstetric setting. The meta-analysis indicated no difference  
46 between water immersion and standard care for cesarean delivery (OR 0.95 95% CI 0.63 – 1.42; fixed effects;  
47 Q=9.05 p=.249; I<sup>2</sup>=22.6%). Subgroup analysis of studies reporting by year of publication remained no difference.  
48 Cumulative meta-analysis indicated this result has been stable at no difference since the first time the outcome  
49 was reported in 2001.  
50  
51  
52  
53  
54  
55  
56  
57



[Figure 9]

**Shoulder Dystocia.** Seven studies provided data that could be synthesized for shoulder dystocia (n=53,367). One additional study reported zero events in the sample and could not be included in the synthesis.<sup>16</sup> There was no difference between water immersion and standard care (OR 0.88 95% CI 0.46 – 1.69; random effects; Q=16 p=.012; I<sup>2</sup>=63%). The subgroup analysis of studies in an obstetric setting and the most recent studies remained no difference. Cumulative meta-analysis indicated there has consistently been no difference.

[Figure 10]

**Intact Perineum.** Seventeen studies provided data on intact perineum (n=59,070). This analysis favoured water immersion (OR 1.48; 95% CI 1.21 – 1.79; random effects; Q=227 p<.001; I<sup>2</sup>=93%). Note the direction of effect for Figure 11 reflects that intact perineum is a positive outcome. Subgroup analysis revealed no difference in odds of intact perineum in midwifery-led settings, in studies that compare waterbirth to no immersion. Subgroup analysis revealed higher odds of intact perineum with water immersion in an obstetric setting and in the most recent studies. Cumulative meta-analysis indicated the available evidence has consistently indicated no difference or favoured water immersion, with evidence stable at favouring water immersion since 2016. Fail-safe analysis estimated 358 additional studies finding no difference would be necessary to change the estimate from favouring water to no difference. Subgroup analysis revealed no difference in odds of intact perineum in midwifery-led settings and in favour of water immersion in an obstetric setting.

Meta-regression identified the episiotomy rate (p<.001) and the proportion of nullipara in the sample (p=.001) accounted for the variation in odds of an intact perineum (R<sup>2</sup>=1.00). Though only six studies provided the necessary data to test this association, the statistically significant result indicated the analysis was adequately powered to find this association. After accounting for these variables, the result was in favour of water immersion (OR 3.03 95% CI 1.52 – 6.04; random effects; Q=2 p=.504 I<sup>2</sup>=0%).

[Figure 11]

1  
2  
3 **OASI.** Fifteen studies provided data on obstetric anal sphincter injuries (n=93,690). This analysis found  
4 no difference (OR 0.84 95% CI 0.60 – 1.18; random effects; Q=52 p<.001; I<sub>2</sub>=73%). Cumulative meta-analysis  
5 indicated the estimate has moved between no difference and favouring water, with the most recent change to no  
6 difference occurring in 2019. Analysis of subgroups by setting found consistent results of no difference in both  
7 settings. Meta-regression of the studies with the a priori selected control variables was not able to reduce the  
8 heterogeneity.  
9  
10  
11  
12  
13  
14

15  
16 [Figure 12]  
17  
18

19  
20 **Episiotomy.** Fifteen studies provided data on use of episiotomy (n=36,498). This analysis f  
21 ound reduced use of episiotomy with water immersion (OR 0.16; 95% CI 0.10 – 0.27; random effects; Q=110  
22 p<.001; I<sup>2</sup>=87%). Subgroup analysis revealed a reduction with water immersion in an obstetric setting, for  
23 nulliparas, and in the most recent studies. Cumulative meta-analysis indicated the available evidence has  
24 consistently favoured water immersion. Fail-safe analysis estimated 1525 additional studies finding no difference  
25 would be necessary to change the estimate from favouring water to no difference.  
26  
27  
28  
29  
30  
31

32 Meta-regression of the studies in an obstetric setting indicated the proportion of primiparas in the sample  
33 accounted for some of the variance (R<sup>2</sup>=.76; p=.001; 7 studies). Though this analysis was limited to seven studies,  
34 the finding of an association indicates the analysis had adequate power to identify the association. After  
35 accounting for the variation in proportion of primiparas, the result remained in favour of water immersion (OR  
36 0.04 95% CI 0.01 – 0.13; random effects; Q=12 p=.038; I<sup>2</sup>=57%).  
37  
38  
39  
40  
41  
42

43 [Figure 13]  
44  
45

46 **Third Stage Management.** No studies provided comparison data for third stage management.  
47  
48  
49

50  
51 **Postpartum Hemorrhage.** Fifteen studies provided data about postpartum hemorrhage (n=63,891) using  
52 three different measures: count of postpartum hemorrhage defined as >500 ml blood loss, mean estimated blood  
53 loss, and change in hemoglobin. Overall, this analysis favoured water immersion (OR 0.69 95% CI 0.51 – 0.95;  
54  
55  
56  
57

1  
2  
3 random effects;  $Q=117$   $p<.001$ ;  $I^2=88\%$ ). Subgroup analysis revealed no difference in odds of postpartum  
4 hemorrhage in midwife-led settings, in studies comparing waterbirth to no water use, and the most recent studies.  
5 Subgroup analysis revealed a reduction with water immersion in an obstetric setting. Cumulative meta-analysis of  
6 the random effects model found the available evidence has consistently indicated no difference. Fail-safe analysis  
7 estimated 198 additional studies finding no difference would be necessary to change the estimate from favouring  
8 water to no difference.  
9  
10  
11  
12  
13  
14

15  
16 Meta-regression of the studies in an obstetric setting identified no association with induction rate ( $R^2=0$ ;  
17  $p=0.777$ ; 9 studies). Too few studies provided the data necessary to determine the effect of active management of  
18 third stage or the delivery of the placenta and membranes into the water.  
19  
20  
21

22 [Figure 14]  
23  
24  
25

26 **Manual removal of the placenta.** Five studies provided data to assess risk for manual removal of the  
27 placenta ( $n=2,893$ ). This analysis indicated no difference (OR 0.73 95% CI 0.38-1.42; fixed effects;  $Q=6$   $p=.181$ ;  
28  $I^2=36\%$ ). Cumulative meta-analysis indicated there has consistently been no difference in manual removal of the  
29 placenta. Subgroup analysis revealed no difference in an obstetric setting and in the most recent studies.  
30  
31  
32  
33

34 [Figure 15]  
35  
36  
37

38 **Maternal Infection.** Three studies provided data about maternal infection ( $n=32,653$ ), all were conducted  
39 in an obstetric setting. This analysis favoured water immersion (OR 0.64 95% CI 0.52 – 0.80; fixed effects;  $Q=0.5$   
40  $p=.792$ ;  $I^2=0\%$ ), however one study carried 97% of the weight for this synthesis. Fail-safe analysis estimated 2  
41 additional studies finding no difference would be necessary to change the estimate from favouring water to no  
42 difference. Three studies were too few for cumulative meta-analysis.  
43  
44  
45  
46  
47

48 [Figure 16]  
49  
50  
51

52 **Maternal Satisfaction.** Six studies provided data on a measure of maternal satisfaction ( $n=4,144$ ). Due to  
53 heterogeneity in measurement tool, this analysis used random effects modeling and results were stratified by  
54  
55  
56  
57

1  
2  
3 measurement tool in the forest plot. This analysis indicated increased satisfaction with water immersion (OR 1.95  
4 95% CI 1.28 – 2.96; random effects;  $Q=7.5$   $p=.184$ ;  $I^2=33\%$ ). Note the direction of effect for Figure 17 reflects  
5 that maternal satisfaction is a positive outcome. Subgroup analysis revealed increased satisfaction with water  
6 immersion in an obstetric setting and in the most recent studies. Cumulative meta-analysis indicated the available  
7 evidence moved from no difference to favoured water immersion in 2018. Fail-safe analysis estimated 133  
8 additional studies finding no difference would be necessary to change the estimate from favouring water to no  
9 difference.  
10  
11  
12  
13  
14  
15  
16

17 [Figure 17]  
18  
19  
20  
21

22 **5-Minute APGAR.** Twenty-one studies provided data for 5-minute APGAR ( $n=100,881$ ). This analysis  
23 found no difference (OR 0.67 95% CI 0.43 – 1.04; random effects;  $Q=160$   $p<.001$ ;  $I^2=87\%$ ). Three additional  
24 studies reported on 5-minute APGAR but did not provide data in a usable format; two found no difference<sup>18,22</sup> and  
25 one reported in favor of water immersion.<sup>31</sup> Analysis of subgroups found consistent results of no difference.  
26  
27  
28  
29  
30  
31 Cumulative meta-analysis indicated the available evidence has consistently demonstrated no difference.

32  
33 Meta-regression indicated that study setting accounted for some between-study variance ( $R^2=.85$ ;  $p=.001$ ;  
34 9 studies). After accounting for setting the analysis favoured water immersion (OR 0.14 95% CI 0.06 – 0.36;  
35 random effects;  $Q=20$   $p=.034$ ;  $I^2=50\%$ ).  
36  
37

38 [Figure 18]  
39  
40  
41

42 **Newborn Resuscitation.** Five studies provided data on newborn resuscitation ( $n=51,028$ ), all were  
43 conducted in an obstetric setting. This analysis found no difference (OR 0.91; 95% CI 0.49 – 1.69; random  
44 effects;  $Q=10$   $p=.048$ ;  $I^2=58$ ). Cumulative meta-analysis indicated this outcome has been stable at no difference  
45 since first reported.  
46  
47  
48  
49

50 [Figure 19]  
51  
52  
53  
54  
55  
56  
57

1  
2  
3 **Transient tachypnea of the newborn.** Two studies provided data on transient tachypnea of the newborn  
4 (n=1,473), both were conducted in an obstetric setting. This analysis found no difference (OR 0.74; 95% CI 0.34-  
5 1.65; fixed effects; Q=1 p=.364; I<sup>2</sup>=0%). Too few studies were available to conduct cumulative meta-analysis and  
6 subgroup analysis.  
7  
8  
9

10  
11 [Figure 20]  
12  
13  
14

15 **Respiratory distress of the newborn.** Three studies provided data on respiratory distress of the newborn  
16 (n=32,707), all were conducted in an obstetric setting. This analysis indicated no difference (OR 0.34; 95% CI  
17 0.05 – 2.43; random effects; Q=18 p<.001; I<sup>2</sup>=88%). Three studies were too few for cumulative meta-analysis.  
18  
19  
20

21 [Figure 21]  
22  
23  
24

25 **Neonatal intensive care unit admission.** No studies met the definition for NICU admission.  
26

27 **Neonatal death.** Three studies provided data on neonatal death (n=66,544), all were published after 2010.  
28 This analysis indicated no difference (OR 0.94; 95% CI 0.63 – 1.40; fixed effects; Q=2 p=.381; I<sup>2</sup>=3%). Subgroup  
29 analysis by setting revealed no difference in midwifery-led settings. Three studies were too few for cumulative  
30 meta-analysis.  
31  
32  
33  
34

35 [Figure 22]  
36  
37  
38  
39

40 **Infection in newborn period.** Only one study met the definition for reporting newborn infection; it  
41 reported no difference.  
42  
43

44 **Cord Avulsion.** Five studies provided data on cord avulsion (n=50,791), all were published after 2010.  
45 This analysis favoured standard care (OR 1.94 95% CI 1.30 – 2.88; fixed effects; Q=1 p=.856; I<sup>2</sup>=0%). One study  
46 was responsible for 92.7% of the weight of this analysis, when that study was removed the result became no  
47 difference (OR 2.92 95% CI 0.67 – 12.77). Subgroup analysis by setting found no difference in an obstetric  
48 setting, but increased odds of cord avulsion in midwifery-led settings. Cumulative meta-analysis indicated the  
49  
50  
51  
52  
53  
54  
55  
56  
57

estimate moved from no difference to favour standard care in 2019. Fail-safe analysis estimated 5 additional studies would be needed to change the estimate to no difference.

[Figure 23]

**Breastfeeding Initiation.** Two studies provided data on breastfeeding initiation (n=692). This analysis found no difference (OR 1.00 95% CI 0.73 – 1.37; fixed effects; Q=1 p=325; I<sup>2</sup>=0%). Note the direction of effect for Figure 24 reflects that breastfeeding initiation is a positive outcome. Two studies were too few for cumulative meta-analysis and subgroup analysis.

[Figure 24]

#### *Risk of bias across studies*

Risk of bias analysis results are available in Table 5. Begg's Test has moderate power with 25 studies, so is underpowered to find publication bias for this review. Egger's Regression identified risk for publication bias in three outcomes: epidural, intact perineum, and shoulder dystocia. In each case, trim & fill estimates of the magnitude of bias indicate the magnitude was too small to affect the results.

Table 5: Analysis of risk of bias across studies comparing water immersion for labor and delivery to standard care.

| Outcome      | k | Begg's Test Rank Correlation S-statistic (p) | Egger's Regression Intercept (p) | Trim & Fill Direction of Bias <sup>a</sup> OR (95% CI) |
|--------------|---|----------------------------------------------|----------------------------------|--------------------------------------------------------|
| Amniotomy    | 5 | 4 (.164)                                     | 5.04 (.129)                      | Standard Care<br>0.43 (0.34 – 0.53)                    |
| Induction    | 3 | -3 (0.059)                                   | -10 (.238)                       | --                                                     |
| Augmentation | 3 | 3 (0.59)                                     | 28.96 (.057)                     | Standard Care<br>0.12 (0.09 – 0.16)                    |
| Opioid       | 8 | -2 (.402)                                    | 2.13 (.197)                      | Standard Care<br>0.17 (0.15 – 0.19)                    |
| Epidural     | 7 | -9 (.088)                                    | -4.51 (.039)                     | Immersion<br>0.67 (0.54 – 0.83)                        |
| Cesarean     | 8 | -2 (.402)                                    | -0.74 (.327)                     | --                                                     |
| Pain         | 8 | 0 (.500)                                     | -1.67 (.339)                     | Standard Care<br>0.16 (0.07 – 0.37)                    |

|                          |    |            |              |                                     |
|--------------------------|----|------------|--------------|-------------------------------------|
| Satisfaction             | 6  | -5 (.174)  | -1.26 (.216) | Immersion<br>1.73 (1.13 – 2.64)     |
| Intact Perineum          | 14 | -10 (.340) | 2.13 (.045)  | Standard Care<br>1.71 (1.40 – 2.10) |
| Episiotomy               | 13 | -11 (.274) | -1.27 (.121) | Immersion<br>0.20 (0.13 – 0.32)     |
| OASI                     | 14 | 3 (.435)   | 0.40 (.234)  | Standard Care<br>0.64 (0.50 – 0.82) |
| Shoulder Dystocia        | 7  | 5 (.226)   | 1.85 (.001)  | Standard Care<br>0.68 (0.38 – 1.21) |
| Maternal Infection       | 3  | --         | 0.34 (.290)  | --                                  |
| Postpartum Hemorrhage    | 13 | 9 (.328)   | -0.23 (.412) | Standard Care<br>0.52 (0.39 – 0.71) |
| Retained Placenta        | 5  | 6 (.071)   | 2.11 (.068)  | Standard Care<br>0.76 (0.29 – 2.03) |
| APGAR                    | 16 | -34 (.179) | 0.86 (.209)  | Standard Care<br>0.59 (0.36 – 0.96) |
| Neonatal Resuscitation   | 5  | 2 (.312)   | 0.69 (.282)  | --                                  |
| Transient Tachypnea      | 2  | --         | --           | --                                  |
| Respiratory Distress     | 3  | 1 (.301)   | -1.77 (.426) | --                                  |
| Neonatal Death           | 3  | 1 (.301)   | 1.34 (.078)  | Standard Care<br>0.84 (0.53 – 1.33) |
| Cord Avulsion            | 5  | 6 (.071)   | 0.36 (.182)  | Standard Care<br>1.86 (1.26 – 2.75) |
| Breastfeeding Initiation | 2  | --         | --           | --                                  |

a. Confidence Interval estimate if bias were corrected.

Trim & Fill analysis conducted with random effects model and indicates OR and 95%

## Discussion

The main findings of this systematic review and meta-analysis are that labouring and/or giving birth in water has clear benefits to women in the obstetric setting. These findings are interesting because, in general, healthy women are more likely to experience interventions and adverse outcomes in this setting compared to midwifery-led settings and this has been reported for women who labour and/or give birth in water.<sup>44,66-68</sup> Given that globally, most births take place in the obstetric setting, this review shows that water immersion can significantly increase the likelihood of an intact perineum and reduce episiotomy; an intervention which offers no perineal or fetal benefit, can increase postnatal pain, anxiety and impact negatively on a woman's birth experience.<sup>69,70</sup> Furthermore, labouring and/or giving birth in water does not increase the likelihood of obstetric anal sphincter injury (OASI),

1  
2  
3 which corroborates previous waterbirth research.<sup>71,72</sup> A significant postpartum haemorrhage (PPH) reduction was  
4  
5 another important finding, which is also supported in the literature.<sup>73</sup>  
6

7 In this study, there was no difference in caesarean delivery rate between those who used water and those who did  
8  
9 not. Interestingly, the cesarean rate in these studies was 3.6%, with all but two studies reporting a cesarean  
10  
11 delivery rate of less than 10% for the study participants. Given the low caesarean rates reported by most studies,  
12  
13 these results should not be generalised to settings with a caesarean rate higher than 10% for women considered  
14  
15 low risk. The study with a caesarean rate of 19% is not generalisable to settings with a low risk cesarean delivery  
16  
17 rate higher than 10% because it compared the use of water immersion to medical augmentation for women with a  
18  
19 stalled labour.<sup>5</sup> One study with a caesarean rate of 26% is generalisable to settings with a higher low risk cesarean  
20  
21 delivery rate.<sup>17</sup>  
22  
23

24 Our results for newborns mirror those reported in three substantial newborn specific systematic reviews.<sup>46-48</sup>  
25  
26 Additionally, this study improved on prior research, which was limited by variations in definition for reporting  
27  
28 newborn infection and NICU admission. The more rigorous definitions used for this study reveals limited  
29  
30 reporting of serious complications. Given the lack of association with poor newborn outcomes between this study  
31  
32 and prior analyses, it is unlikely that differences in prevalence of serious complications between water immersion  
33  
34 and standard care exist.  
35  
36  
37  
38

39 More cord avulsions were reported for waterbirths and may relate to possible undue traction on the umbilical cord  
40  
41 as the newborn is brought up out of the water.<sup>44,74</sup> The incidence of cord avulsion was 4.3 per 1,000 births in water  
42  
43 compared to 1.3 per 1,000 births with standard care. Interestingly, the incidence of cord avulsion varied from 0.2  
44  
45 per 1,000 to 11.8 per 1,000 in the five studies that reported this outcome, suggesting individual practice  
46  
47 characteristics are more relevant to the incidence of cord avulsion than whether the birth occurs in water. A  
48  
49 review of case reports of poor newborn outcomes found that when reported, cord avulsion was easily managed by  
50  
51 the midwife with no consequences for the newborn.<sup>75</sup>  
52  
53  
54  
55  
56  
57



1  
2  
3 Our results show that water immersion has the potential to make a meaningful contribution to the global  
4 agenda toward promoting physiologic birth.<sup>84-88</sup> Labouring and/or giving birth in water can reduce maternal pain  
5 with no increased risk of an adverse event, and without the risk introduced by epidural and opioids.<sup>77,78,80</sup>  
6  
7 Differences between birth settings in intact perineum and postpartum haemorrhage suggest water immersion in an  
8 obstetric setting may result in outcomes similar to those achieved in midwifery-led settings. This interpretation is  
9 supported by the results of subgroup analysis of studies in an obstetric setting that labour induction and  
10 episiotomy are reduced with water immersion, while maternal satisfaction is increased. Given these results, water  
11 immersion for labour and birth is a tool that can be used to achieve physiologic birth and improve the quality of  
12 care in the obstetric setting.  
13

14  
15 One major issue that hindered the potential of this review was that only three studies were conducted in  
16 midwifery-led settings. None of the included studies described the care model in operation where the study  
17 participants laboured. Healthy women who give birth in a midwifery-led setting are more likely to experience  
18 fewer interventions and adverse outcomes compared with those who give birth in an obstetric setting, particularly  
19 nullipara.<sup>38,44</sup> There is strong evidence showing that the relational element of care matters to service users, and  
20 continuity of carer/care is linked to fewer interventions and adverse outcomes when compared to fragmented care  
21 models.<sup>89</sup> This is important because birth pool use is most prevalent in midwifery-led settings.<sup>38</sup> Evidence-based  
22 practice of water immersion requires research that reflects the context of care provision.  
23

24  
25 Few studies provided information generally considered to be relevant to the outcomes reported or controlled  
26 for potential confounders. Just over half the studies (k=20, 55%) included some description of the birth pool(s),  
27 resulting in uncertainty about whether all participants could move around and adopt different positions with ease.  
28 Few studies stratified for parity, even when the outcomes reported occur at higher rates among nullipara. Only six  
29 studies (17%) mentioned inclusion of induction of labour while five studies included women with a prior cesarean.  
30 Only eight studies (22%) provided birth pool eligibility criteria regarding BMI. These studies did not include  
31 separate analysis of outcomes for women generally excluded from water immersion, however their inclusion in the  
32 study populations suggest water immersion is not harmful. No studies provided data for the management of the  
33 third stage of labour in the studies, to enable examination for any associations between active or physiological  
34

1  
2  
3 management and postpartum haemorrhage. Improvements in reporting standards would enable expansion of  
4  
5 populations considered appropriate for water immersion and identify best practice for birth pool use.  
6

### 7 **Strengths and Limitations of this work**

8  
9 This was the first substantial systematic review to attempt to include birth setting as an analytic variable.  
10  
11 A broad search strategy was developed and all review processes were conducted by at least two reviewers. This  
12  
13 study incorporated meta-regression, using covariates identified a priori, to reduce the effect of sources of  
14  
15 heterogeneity. The inclusion of analyses of the stability of the results, cumulative meta-analysis and fail-safe, add  
16  
17 value to the synthesis by identifying which outcomes may be considered sufficiently researched. The results are  
18  
19 further strengthened by use of a trim & fill analysis to identify the direction of any potential publication bias.  
20  
21

22 This review was limited to studies published in 2000 or later because earlier studies may not be  
23  
24 generalisable to current water immersion practices. This review was limited by language; the search was  
25  
26 conducted in English using English-language indices. This analysis was limited to a priori variables for meta-  
27  
28 regression. Additional variables, not tested in this study, may contribute to heterogeneity. This review did not  
29  
30 include grey literature.  
31

### 32 **Clinical Implications**

33  
34 Water immersion provides benefits for the mother and newborn when used in the obstetric setting,  
35  
36 making water immersion a tool for improving quality and satisfaction with care. In addition, water immersion for  
37  
38 labour and waterbirth alters clinical practice resulting in less augmentation, episiotomy, and requirements for  
39  
40 pharmacologic analgesia. Water immersion is an effective method to reduce pain in labour, without increasing  
41  
42 risk. Clinicians should be mindful to avoid putting undue traction on the umbilical cord when bringing the  
43  
44 newborn to the surface of the water.  
45  
46

### 47 **Research implications**

48  
49 Water immersion during labour and birth is a low-tech yet complex, nuanced intervention. We suggest  
50  
51 that studies incorporate the following fundamentals to advance the evidence: birth pool description, clearly  
52  
53 described maternal and obstetric characteristics, the birth setting, the care model, and use of standardised  
54  
55 definitions. Studies should report potential confounders such as hands-on or -off the perineum and third stage  
56  
57

1  
2  
3 management. When appropriate for the outcome, results should be stratified by maternal parity. The study  
4  
5 population should reflect all those now using a birth pool, not just the healthy women who experience an  
6  
7 uncomplicated pregnancy. There is a need for additional research conducted in midwifery-led settings to establish  
8  
9 best practice.  
10

## 11 **Conclusion**

12  
13 Water immersion during labour and birth, while low-tech, is a complex, nuanced intervention. It has clear  
14  
15 benefits for healthy women and their newborns when conducted in an obstetric setting and may have benefits for  
16  
17 populations previously excluded from water immersion. Future research should focus on implementing water  
18  
19 immersion in all birth settings and identification of best practice.  
20  
21  
22  
23  
24  
25  
26  
27  
28  
29  
30  
31  
32  
33  
34  
35  
36  
37  
38  
39  
40  
41  
42  
43  
44  
45  
46  
47  
48  
49  
50  
51  
52  
53  
54  
55  
56  
57

### Author Contributions

EB: conceptualisation, protocol writing, investigation, methodology, writing-original draft, writing-review and editing, project administration, funding acquisition for Open Access publication.

Dr Ethel Burns, Senior Midwifery Lecturer, Midwifery research Lead, Oxford Brookes University, Oxford UK

CF<sub>1</sub>: methodology, protocol writing, validation, writing-original draft, writing- review and editing, visualisation.  
Dr Claire Feeley, Midwife Researcher, Associate Lecturer, Oxford Brookes University, Oxford UK.

PH: conceptualisation, investigation, writing - original draft, writing – review and editing  
Dr Priscilla Hall, Midwife Researcher and Senior Instructor, Emory University in the Nell Hodgson Woodruff School of Nursing, Atlanta, Georgia USA

JV: conceptualisation, methodology, investigation, data curation, formal analysis, writing – original draft, writing – review and editing, visualisation.

Assistant Professor Jennifer Vanderlaan, University of Nevada, Las Vegas School of Nursing, Nevada USA

### Collaborators - scientific Advisers

Cindy Farley (CF<sub>2</sub>): Methodology, Investigation, Review  
Associate Professor, Georgetown University, Washington DC, USA

Vicki Farmilo (VF): Methodology, validation & Investigation  
Health care librarian, Oxford Brookes University, Oxford, UK

Dr Reem Malouf (RM): Methodology, Review.  
Neurologist, Specialist in Internal Medicine, National Perinatal Epidemiology Units, Oxford UK

Dr Charles Roehr (CR): Methodology, Review  
National Perinatal Epidemiology Unit Clinical Trials Unit, Oxford UK.  
Academic Consultant Neonatologist, Newborn Services, Southmead Hospital, North Bristol Trust, Bristol.

Dr Harriet Thorn-Cole (HC), validation, review.  
Scientific Collaborator, University of Health Sciences of Western Switzerland, Lausanne, Switzerland.

### *Research Ethics Approval*

No patient involvement

### *Funding*

This research received no specific grant for funding from any agency in the public, commercial or not-for-profit sectors.

### *Competing Interests*

There were no competing interests.

### *Data Sharing Statement*

No data sharing agreement was required for this research.

1  
2  
3  
4  
5  
6  
7  
8  
9  
10  
11  
12  
13  
14  
15  
16  
17  
18  
19  
20  
21  
22  
23  
24  
25  
26  
27  
28  
29  
30  
31  
32  
33  
34  
35  
36  
37  
38  
39  
40  
41  
42  
43  
44  
45  
46  
47  
48  
49  
50  
51  
52  
53  
54  
55  
56  
57  
58  
59  
60

For peer review only

## References

### Included Studies

1. Bailey JM, Zielinski RE, Emeis CL, Kane Low L. A retrospective comparison of waterbirth outcomes in two United States hospital settings. *Birth*. March 2020;47(1):98-104.
2. Barry PL, McMahon LE, Banks RA, Fergus AM, Murphy DJ. Prospective cohort study of water immersion for labour and birth compared with standard care in an Irish maternity setting. *BMJ Open*. 2020;10(12):e038080. Published 2020 Dec 4. doi:10.1136/bmjopen-2020-038080).
3. Benfield RD, Hortobágyi T, Tanner CJ, Swanson M, Heitkemper MM, Newton ER. The Effects of Hydrotherapy on Anxiety, Pain, Neuroendocrine Responses, and Contraction Dynamics During Labor. *Biological Research for Nursing*. 2010;12(1):28-36.
4. Bovbjerg ML, Cheyney M, Everson C. Maternal and Newborn Outcomes Following Waterbirth: The Midwives Alliance of North America Statistics Project, 2004 to 2009 Cohort. *Journal of Midwifery and Women's Health*. January 2016;61(1):11-20.
5. Cluett ER, Pickering RM, Getliffe K, St George Saunders NJ. Randomised controlled trial of labouring in water compared with standard of augmentation for management of dystocia in first stage of labour. *BMJ*. 2004;328(7435):314. doi:10.1136/bmj.37963.606412.EE.
6. da Silva FMB, de Oliveira SMJV, Nobre MRC. A randomised controlled trial evaluating the effect of immersion bath on labour pain. *Midwifery*. June 2009;25(3):286-294.
7. Eckert K, Turnbull D, MacLennan A. Immersion in water in the first stage of labor: A randomized controlled trial. *Birth*. 2001;28(2):84-93.
8. Geissbühler V, Eberhard J. Waterbirths: A comparative study - A prospective study on more than 2,000 waterbirths. *Fetal Diagnosis and Therapy*. 2000;15(5):291-300.
9. Geissbuehler V, Eberhard J, Lebrecht A. Waterbirth: Water temperature and bathing time - Mother knows best! *Journal of Perinatal Medicine*. 2002;30(5):371-378.
10. Geissbuehler V, Stein S, Eberhard J. Waterbirths compared with landbirths: An observational study of nine years. *Journal of Perinatal Medicine*. 2004;32(4):308-314.
11. Haslinger C, Burkhardt T, Stoiber B, Zimmermann R, Schäffer L. Position at birth as an important factor for the occurrence of anal sphincter tears: A retrospective cohort study. *Journal of Perinatal Medicine*. November 2015;43(6):715-720.

12. Henderson, J., Burns, E.E., Regalia, A.L. *et al.* Labouring women who used a birthing pool in obstetric units in Italy: prospective observational study. *BMC Pregnancy Childbirth* **14**, 17 (2014). <https://doi.org/10.1186/1471-2393-14-17>
13. Hodgson ZG, Comfort LR, Albert AAY. Water Birth and Perinatal Outcomes in British Columbia: A Retrospective Cohort Study. *J Obstet Gynaecol Can.* 2020;42(2):150-155. doi:10.1016/j.jogc.2019.07.007
14. Jacoby S, Becker G, Crawford S, Wilson RD. Water Birth Maternal and Neonatal Outcomes Among Midwifery Clients in Alberta, Canada, from 2014 to 2017: A Retrospective Study. *J Obstet Gynaecol Can.* 2019;41(6):805-812. doi:10.1016/j.jogc.2018.12.014
15. Lathrop A, Bonsack CF, Haas DM. Women's experiences with water birth: A matched groups prospective study. *Birth.* December 2018;45(4):416-423.
16. Lim KMX, Tong PSY, Chong YS. A comparative study between the pioneer cohort of waterbirths and conventional vaginal deliveries in an obstetrician-led unit in Singapore. *Taiwanese Journal of Obstetrics and Gynecology.* June 2016;55(3):363-367.
17. Liu, Y., Liu, Y., Huang, X. *et al.* A comparison of maternal and neonatal outcomes between water immersion during labor and conventional labor and delivery. *BMC Pregnancy Childbirth* **14**, 160 (2014). <https://doi.org/10.1186/1471-2393-14-160>
18. Mallen-Perez L, Roé-Justiniano MT, Colomé Ochoa N, Ferre Colomat A, Palacio M, Terré Rull C. Use of hydrotherapy during labour: Assessment of pain, use of analgesia and neonatal safety. *Enfermeria Clinica.* September 2018;28(5):309-315.
19. Menakaya U, Albayati S, Vella E, Fenwick J, Angstetra D. A retrospective comparison of water birth and conventional vaginal birth among women deemed to be low risk in a secondary level hospital in Australia. *Women and Birth.* June 2013;26(2):114-118.
20. Mollamahmutoğlu L, Moraloğlu Ö, Özyer Ş, *et al.* The effects of immersion in water on labor, birth and newborn and comparison with epidural analgesia and conventional vaginal delivery. *Journal of the Turkish German Gynecology Association.* 2012;13(1):45-49.
21. Neiman E, Austin E, Tan A, Anderson CM, Chippis E. Outcomes of Waterbirth in a US Hospital-Based Midwifery Practice: A Retrospective Cohort Study of Water Immersion During Labor and Birth. *Journal of Midwifery and Women's Health.* March 2020;65(2):216-223.

- 1  
2  
3 22. Ohlsson G, Buchhave P, Leandersson U, Nordström L, Rydhström H, Sjölin I. Warm tub bathing  
4 during labor: Maternal and neonatal effects. *Acta Obstetrica et Gynecologica Scandinavica*. January  
5 2001;80(4):311-314.  
6  
7  
8 23. Otigbah CM, Dhanjal MK, Harmsworth G, Chard T. A retrospective comparison of water births and  
9 conventional vaginal deliveries. *European Journal of Obstetrics and Gynecology and Reproductive  
10 Biology*. 2000;91(1):15-20.  
11  
12 24. Pagano E, De Rota B, Ferrando A, Petrinco M, Merletti F, Gregori D. An economic evaluation of  
13 water birth: The cost-effectiveness of mother well-being. *Journal of Evaluation in Clinical Practice*.  
14 October 2010;16(5):916-919.  
15  
16 25. Peacock PJ, Zengeya ST, Cochrane L, Sleath M. Neonatal Outcomes Following Delivery in Water:  
17 Evaluation of Safety in a District General Hospital. *Cureus*. February 2018;10(2).  
18  
19 26. Preston HL, Alfirovic Z, Fowler GE, Lane S. Does water birth affect the risk of obstetric anal  
20 sphincter injury? Development of a prognostic model. *International Urogynecology Journal*. June  
21 2019;30(6):909-915.  
22  
23 27. Ros H. Effect, of waterbirths and traditional bedbirths on outcomes for neonates. *Curationis*.  
24 2009;32(2).  
25  
26 28. Sert UY, Ozel S, Neselioglu S, Erel O, Engin Ustun Y. Water Immersion During the Labour and  
27 Effects on Oxidative Stress. *Fetal and Pediatric Pathology*. May 2020;39(3):185-193.  
28  
29 29. Snapp C, Stapleton SR, Wright J, Niemczyk NA, Jolles D. The experience of land and water birth  
30 within the american association of birth centers perinatal data registry, 2012-2017. *Journal of  
31 Perinatal and Neonatal Nursing*. January 2020;34(1):16-25.  
32  
33 30. Thoeni A, Zech N, Moroder L, Ploner F. Review of 1600 water births. Does water birth increase the  
34 risk of neonatal infection? *Journal of Maternal-Fetal and Neonatal Medicine*. May 2005;17(5):357-  
35 361.  
36  
37 31. Torkamani 2010. Torkamani SA, Kangani F, Janani F. The effects of delivery in water on duration  
38 of delivery and pain compared with normal delivery. *Pakistan Journal of Medical  
39 Sciences*. 2010;26(3):551-5  
40  
41 32. Ulfeddottir H, Saltvedt S, Georgsson S. Waterbirth in Sweden – a comparative study. *Acta Obstetrica  
42 et Gynecologica Scandinavica*. March 2018;97(3):341-348.  
43  
44 33. Woodward J, Kelly SM. A pilot study for a randomised controlled trial of waterbirth versus land  
45 birth. *BJOG*. 2004;111(6):537-545. doi:10.1111/j.1471-0528.2004.00132.x  
46  
47  
48  
49  
50  
51  
52  
53  
54  
55  
56  
57



- 1  
2  
3 34. Zanetti-Dällenbach R, Lapaire O, Maertens A, Holzgreve W, Hösli I. Water birth, more than a  
4 trendy alternative: A prospective, observational study. *Archives of Gynecology and Obstetrics*.  
5 October 2006;274(6):355-365.  
6  
7  
8 35. Zanetti-Daellenbach RA, Tschudin S, Zhong XY, Holzgreve W, Lapaire O, Hösli I. Maternal and  
9 neonatal infections and obstetrical outcome in water birth. *European Journal of Obstetrics and*  
10 *Gynecology and Reproductive Biology*. 2007;134(1):37-43.  
11  
12 36. Ziolkowski R, Dabrus D, Czerniawski W, Dudek K, Darmochwal-Kolarz D, Oleszczuk J. An  
13 assessment of water births based on the author's own research *Ginekologia i Poloznictwo*.  
14 2009;14(4):57-65.  
15  
16  
17  
18  
19  
20  
21  
22  
23  
24  
25  
26  
27  
28  
29  
30  
31  
32  
33  
34  
35  
36  
37  
38  
39  
40  
41  
42  
43  
44  
45  
46  
47  
48  
49  
50  
51  
52  
53  
54  
55  
56  
57  
58  
59  
60

### Additional References

37. Cluett ER, Burns E, Cuthbert A. Immersion in water during labour and birth. *Cochrane Database Syst Rev*. 2018;5(5):CD000111. Published 2018 May 16. doi:10.1002/14651858.CD000111.pub4
38. Brocklehurst P, Hardy P, Hollowell J, et al. Perinatal and maternal outcomes by planned place of birth for healthy women with low risk pregnancies: The Birthplace in England national prospective cohort study. *BMJ* 2011; 343:d7400 <https://doi.org/10.1136/bmj.d7400> (Published 25 November 2011)
39. Prins M, Boxem J, Lucas C, Hutton E. Effect of spontaneous pushing versus Valsalva pushing in the second stage of labour on mother and fetus: a systematic review of randomised trials. *BJOG*. 2011;118(6):662-670. doi:10.1111/j.1471-0528.2011.02910.x
40. Edqvist, M., Blix, E., Hegaard, H.K. *et al.* Perineal injuries and birth positions among 2992 women with a low risk pregnancy who opted for a homebirth. *BMC Pregnancy Childbirth* **16**, 196 (2016). <https://doi.org/10.1186/s12884-016-0990-0>
41. Gupta JK, Sood A, Hofmeyr GJ, Vogel JP. Position in the second stage of labour for women without epidural anaesthesia. *Cochrane Database Syst Rev*. 2017;5(5):CD002006. Published 2017 May 25. doi:10.1002/14651858.CD002006.pub4
42. Aasheim V, Nilsen AB, Lukasse M, Reinar LM. Perineal techniques during the second stage of labour for reducing perineal trauma. *Cochrane Database Syst Rev*. 2011;(12):CD006672. Published 2011 Dec 7. doi:10.1002/14651858.CD006672.pub2
43. Bulchandani S, Watts E, Sucharitha A, Yates D, Ismail KM. Manual perineal support at the time of childbirth: a systematic review and meta-analysis. *BJOG: An International Journal of Obstetrics and Gynaecology*. 2015;122(9):1157-1165.
44. Burns EE, Boulton MG, Cluett E, Cornelius VR, Smith LA. Characteristics, interventions, and outcomes of women who used a birthing pool: a prospective observational study. *Birth*. 2012;39(3):192-202.
45. Begley CM, Gyte GM, Devane D, McGuire W, Weeks A, Biesty LM. Active versus expectant management for women in the third stage of labour. *Cochrane Database Syst Rev*. 2019;2(2):CD007412. Published 2019 Feb 13. doi:10.1002/14651858.CD007412.pub5
46. Davies R, Davis D, Pearce M, Wong N. The effect of waterbirth on neonatal mortality and morbidity: a systematic review and meta-analysis. *JBIC Database System Rev Implement Rep*. 2015;13(10):180-231. doi:10.11124/jbisrir-2015-2105

- 1  
2  
3 47. Taylor H, Kleine I, Bewley S, Loucaides E, Sutcliffe A. Neonatal outcomes of waterbirth: a  
4 systematic review and meta-analysis. *Arch Dis Child Fetal Neonatal Ed.* 2016;101(4):F357-F365.  
5 doi:10.1136/archdischild-2015-309600  
6  
7  
8 48. Vanderlaan J, Hall PJ, Lewitt M. Neonatal outcomes with water birth: A systematic review and  
9 meta-analysis. *Midwifery.* 2018;59:27-38. doi:10.1016/j.midw.2017.12.023  
10  
11 49. Pagano E, De Rota B, Ferrando A, Petrinco M, Merletti F, Gregori D. An economic evaluation of  
12 water birth: the cost-effectiveness of mother well-being. *Journal of Evaluation in Clinical Practice.*  
13 2010;16(5):916-919.  
14  
15 50. Davies MW. Water births and the research required to assess the benefits versus the harms. *Journal*  
16 *of Paediatrics and Child Health.* 2012;48(9):726-729.  
17  
18 51. Bovbjerg ML. Opposition to Waterbirth Is Not Evidence Based. May 2021;30(5):625-627.  
19  
20 <https://home.liebertpub.com/jwh>  
21  
22 52. Page MJ, McKenzie JE, Bossuyt PM, et al. The PRISMA 2020 statement: an updated guideline for  
23 reporting systematic reviews. *BMJ.* 2021;372:n71. Published 2021 Mar 29. doi:10.1136/bmj.n71  
24  
25 53. Squires JE, Valentine JC, Grimshaw JM. Systematic reviews of complex interventions: framing the  
26 review question. *Journal of Clinical Epidemiology.* 2013;66(11):1215-22.  
27  
28 54. JPT H, Green S. Cochrane Handbook for Systematic Reviews of Interventions Version 5.1.0  
29 [updated March 2011]: The Cochrane Collaboration; 2011 <https://handbook-5-1.cochrane.org/>  
30  
31 55. Ouzzani, M., Hammady, H., Fedorowicz, Z. *et al.* Rayyan—a web and mobile app for systematic  
32 reviews. *Syst Rev* 5, 210 (2016). <https://doi.org/10.1186/s13643-016-0384-4>  
33  
34 56. Sterne JA, Hernán MA, Reeves BC, et al. ROBINS-I: a tool for assessing risk of bias in non-  
35 randomised studies of interventions. *BMJ.* 2016;355:i4919. Published 2016 Oct 12.  
36  
37 doi:10.1136/bmj.i4919  
38  
39 57. Biostat Inc. Comprehensive Meta-Analysis V.3. 2017.  
40  
41 58. Leimu R, Koricheva J. Cumulative meta-analysis: A new tool for detection of temporal trends and  
42 publication bias in ecology. *Proceedings of the Royal Society B: Biological Sciences.* September  
43 2004;271(1551):1961-1966.  
44  
45 59. Carson KP, Schriesheim CA, Kinicki AJ. The Usefulness of the "Fail-Safe" Statistic in Meta-  
46 Analysis. *Educational and Psychological Measurement.* June 1990;50(2):233-243.  
47  
48 60. The Nordic Cochrane Center TCC. Review Manger (RevMan) 5.4.1  
49  
50 <https://training.cochrane.org/online-learning/core-software-cochrane-reviews/revman>  
51  
52  
53  
54  
55  
56  
57

- 1  
2  
3  
4  
5  
6  
7  
8  
9  
10  
11  
12  
13  
14  
15  
16  
17  
18  
19  
20  
21  
22  
23  
24  
25  
26  
27  
28  
29  
30  
31  
32  
33  
34  
35  
36  
37  
38  
39  
40  
41  
42  
43  
44  
45  
46  
47  
48  
49  
50  
51  
52  
53  
54  
55  
56  
57  
58  
59  
60
61. Murad MH, Chu H, Lin L, Wang Z. The effect of publication bias magnitude and direction on the certainty in evidence. *BMJ Evid Based Med*. 2018;23(3):84-86. doi:10.1136/bmjebm-2018-110891
62. Duval S, Tweedie R. Trim and fill: A simple funnel-plot-based method of testing and adjusting for publication bias in meta-analysis. *Biometrics*. 2000;56(2):455-463. doi:10.1111/j.0006-341x.2000.00455.x
63. Baker WL, White CM, Cappelleri JC, Kluger J, Coleman CI; Health Outcomes, Policy, and Economics (HOPE) Collaborative Group. Understanding heterogeneity in meta-analysis: the role of meta-regression. *Int J Clin Pract*. 2009;63(10):1426-1434. doi:10.1111/j.1742-1241.2009.02168.x
64. Borenstein M, Hedges LV, Higgins JPT, Rothstein H. *Regression in Meta-Analysis* 2017.
65. Piccininni, M., Konigorski, S., Rohmann, J.L. *et al*. Directed acyclic graphs and causal thinking in clinical risk prediction modeling. *BMC Med Res Methodol* **20**, 179 (2020).  
<https://doi.org/10.1186/s12874-020-01058-z>
66. Koto PS, Fahey J, Meier D, Ledrew M, Loring S. Relative effectiveness and cost-effectiveness of the midwifery-led care in Nova Scotia, Canada: A retrospective, cohort study. *Midwifery*. 2019;77:144-154.
67. Alliman J, Stapleton SR, Wright J, Bauer K, Slider K, Jolles D. Strong Start in birth centers: Socio-demographic characteristics, care processes, and outcomes for mothers and newborns. *Birth*. June 2019;46(2):234-243.
68. Scarf VL, Rossiter C, Vedam S, et al. Maternal and perinatal outcomes by planned place of birth among women with low-risk pregnancies in high-income countries: A systematic review and meta-analysis. *Midwifery*. 2018;62:240-255. doi:10.1016/j.midw.2018.03.024
69. He S, Jiang H, Qian X, Garner P. Women's experience of episiotomy: A qualitative study from China. *BMJ Open*. July 2020;10(7). <https://bmjopen.bmj.com/content/10/7/e033354>
70. Jiang H, Qian X, Carroli G, Garner P. Selective versus routine use of episiotomy for vaginal birth. *Cochrane Database of Systematic Reviews*. February 2017; Issue 2. Art. No.: CD000081. DOI: 10.1002/14651858.CD000081.pub3. Accessed 13 August 2021
71. Burns E, Price L, Carpenter J, Smith L. Predictors of obstetric anal sphincter injury during waterbirth: a secondary analysis of a prospective observational study. *International Urogynecology Journal*. March 2020;31(3):651-656.

- 1  
2  
3 72. Dahlen HG, Dowling H, Tracy M, Schmied V, Tracy S. Maternal and perinatal outcomes amongst  
4 low risk women giving birth in water compared to six birth positions on land. A descriptive cross  
5 sectional study in a birth centre over 12 years. *Midwifery*. July 2013;29(7):759-764.  
6  
7  
8 73. Aughey, H., Jardine, J., Moitt, N. *et al*. Waterbirth: a national retrospective cohort study of factors  
9 associated with its use among women in England. *BMC Pregnancy Childbirth* **21**, 256 (2021).  
10 <https://doi.org/10.1186/s12884-021-03724-6>  
11  
12 74. Cro S, Preston J. Cord snapping at waterbirth delivery. *British Journal of Midwifery*. August  
13 2002;10(8):494-497.  
14  
15 75. Vanderlaan J, Hall P. Systematic Review of Case Reports of Poor Neonatal Outcomes With Water  
16 Immersion During Labor and Birth. *Journal of Perinatal & Neonatal Nursing*. October  
17 2020;34(4):311-323.  
18  
19 76. Smith LA, Burns E, Cuthbert A. Parenteral opioids for maternal pain management in  
20 labour. *Cochrane Database Syst Rev*. 2018;6(6):CD007396. Published 2018 Jun 5.  
21 doi:10.1002/14651858.CD007396.pub3.  
22  
23 77. Moran VH, Thomson G, Cook J, et al. Qualitative exploration of women's experiences of  
24 intramuscular pethidine or remifentanyl patient-controlled analgesia for labour pain. *BMJ Open*.  
25 December 2019;9(12). <https://bmjopen.bmj.com/content/bmjopen/9/12/e032203.full.pdf>  
26  
27 78. Fleet JA, Jones M, Belan I. The influence of intrapartum opioid use on breastfeeding experience at 6  
28 weeks post partum: A secondary analysis. *Midwifery*. 2017;50:106-109.  
29 doi:10.1016/j.midw.2017.03.024  
30  
31 79. National Library of Medicine (US). Drugs and Lactation Database (LactMed). Bethesda; 2006.  
32 <https://www.ncbi.nlm.nih.gov/books/NBK501922/>  
33  
34 80. Penuela, I., Isasi-Nebreda, P., Almeida, H. *et al*. Epidural analgesia and its implications in the  
35 maternal health in a low parity community. *BMC Pregnancy Childbirth* **19**, 52 (2019).  
36 <https://doi.org/10.1186/s12884-019-2191-0>  
37  
38 81. Newnham EC, Moran PS, Begley CM, Carroll M, Daly D. Comparison of labour and birth outcomes  
39 between nulliparous women who used epidural analgesia in labour and those who did not: A  
40 prospective cohort study [published online ahead of print, 2020 Sep 11]. *Women Birth*. 2020;S1871-  
41 5192(20)30318-8. doi:10.1016/j.wombi.2020.09.001  
42  
43  
44  
45  
46  
47  
48  
49  
50  
51  
52  
53  
54  
55  
56  
57  
58  
59  
60

- 1  
2  
3 82. Kjærgaard, H., Olsen, J., Ottesen, B. *et al.* Obstetric risk indicators for labour dystocia in nulliparous  
4 women: A multi-centre cohort study. *BMC Pregnancy Childbirth* **8**, 45 (2008).  
5 <https://doi.org/10.1186/1471-2393-8-45>  
6  
7  
8 83. Anim-Somuah M, Smyth RM, Cyna AM, Cuthbert A. Epidural versus non-epidural or no analgesia  
9 for pain management in labour. *Cochrane Database of Systematic Reviews* 2018. Issue 5. Art. No.:  
10 CD000331. DOI: 10.1002/14651858.CD000331.pub4. Accessed 13 August 2021.  
11  
12  
13 84. World Health Organization. WHO recommendations: intrapartum care for a positive childbirth  
14 experience 2018. [https://www.who.int/reproductivehealth/publications/intrapartum-care-](https://www.who.int/reproductivehealth/publications/intrapartum-care-guidelines/en/)  
15 [guidelines/en/](https://www.who.int/reproductivehealth/publications/intrapartum-care-guidelines/en/)  
16  
17  
18 85. Prosser, S.J., Barnett, A.G. & Miller, Y.D. Factors promoting or inhibiting normal birth. *BMC*  
19 *Pregnancy Childbirth* **18**, 241 (2018). <https://doi.org/10.1186/s12884-018-1871-5>  
20  
21  
22 86. Supporting Healthy and Normal Physiologic Childbirth: A Consensus Statement by ACNM,  
23 MANA, and NACPM. *J Perinat Educ.* 2013;22(1):14-18. doi:10.1891/1058-1243.22.1.14, MANA,  
24 and NACPM 2013. 1058-1243  
25  
26  
27 87. National Childbirth Trust. Normal birth as a measure of the quality of care 2010.  
28 [https://www.nct.org.uk/sites/default/files/related\\_documents/Normalbirthasameasureofthequalityofc](https://www.nct.org.uk/sites/default/files/related_documents/NormalbirthasameasureofthequalityofcareV3.pdf)  
29 [areV3.pdf](https://www.nct.org.uk/sites/default/files/related_documents/NormalbirthasameasureofthequalityofcareV3.pdf)  
30  
31  
32 88. International Confederation of Midwives. Keeping Birth Normal 2014.  
33 [https://www.internationalmidwives.org/assets/files/statement-files/2018/04/keeping-birth-normal-](https://www.internationalmidwives.org/assets/files/statement-files/2018/04/keeping-birth-normal-eng.pdf)  
34 [eng.pdf](https://www.internationalmidwives.org/assets/files/statement-files/2018/04/keeping-birth-normal-eng.pdf)  
35  
36  
37 89. Sandall J, Soltani H, Gates S, Shennan A, Devane D. Midwife-led continuity models versus other  
38 models of care for childbearing women. *Cochrane Database of Systematic Reviews* 2016, Issue 4. Art. No.:  
39 CD004667. DOI: 10.1002/14651858.CD004667.pub5  
40  
41  
42 90. Chen C, Xu X, Yan Y. Estimated global overweight and obesity burden in pregnant women based on  
43 panel data model. *PLoS One.* 2018;13(8):e0202183. Published 2018 Aug 9.  
44 doi:10.1371/journal.pone.0202183  
45  
46  
47 91. Relph S, Guo Y, Harvey ALJ, et al. Characteristics associated with uncomplicated pregnancies  
48 in women with obesity: a population-based cohort study. *BMC Pregnancy Childbirth* **21**, 182 (2021).  
49 <https://doi.org/10.1186/s12884-021-03663-2>  
50  
51  
52 92. Marshall A. High BMI waterbirth - time for trusts to take the plunge? *AIMS* 2019;31(2).  
53 <https://www.aims.org.uk/journal/item/waterbirth-high-bmi>  
54  
55  
56  
57

**Figures**

1. PRISMA flow diagram
2. Risk of bias assessment
3. Synthesis of Labour Induction
4. Synthesis of Amniotomy
5. Synthesis of labour Augmentation
6. Synthesis of Opioid use
7. Synthesis of Epidural use
8. Synthesis of Maternal pain
9. Synthesis of Caesarean section delivery
10. Synthesis of Shoulder dystocia
11. Synthesis of Intact perineum
12. Synthesis of Obstetric Anal Sphincter Injury (OASI)
13. Synthesis of Episiotomy
14. Synthesis of Postpartum haemorrhage
15. Synthesis of Manual removal of placenta
16. Synthesis of Maternal infection
17. Synthesis of Maternal satisfaction
18. Synthesis of 5-minute Apgar
19. Synthesis of Neonatal resuscitation
20. Synthesis of Transient tachypnoea of the newborn
21. Synthesis of Respiratory distress
22. Synthesis of Neonatal Death
23. Synthesis of Cord avulsion
24. Synthesis of Breastfeeding initiation

Figure 1 PRISMA 2020 flow diagram for new systematic reviews which included searches of databases, registers and other sources

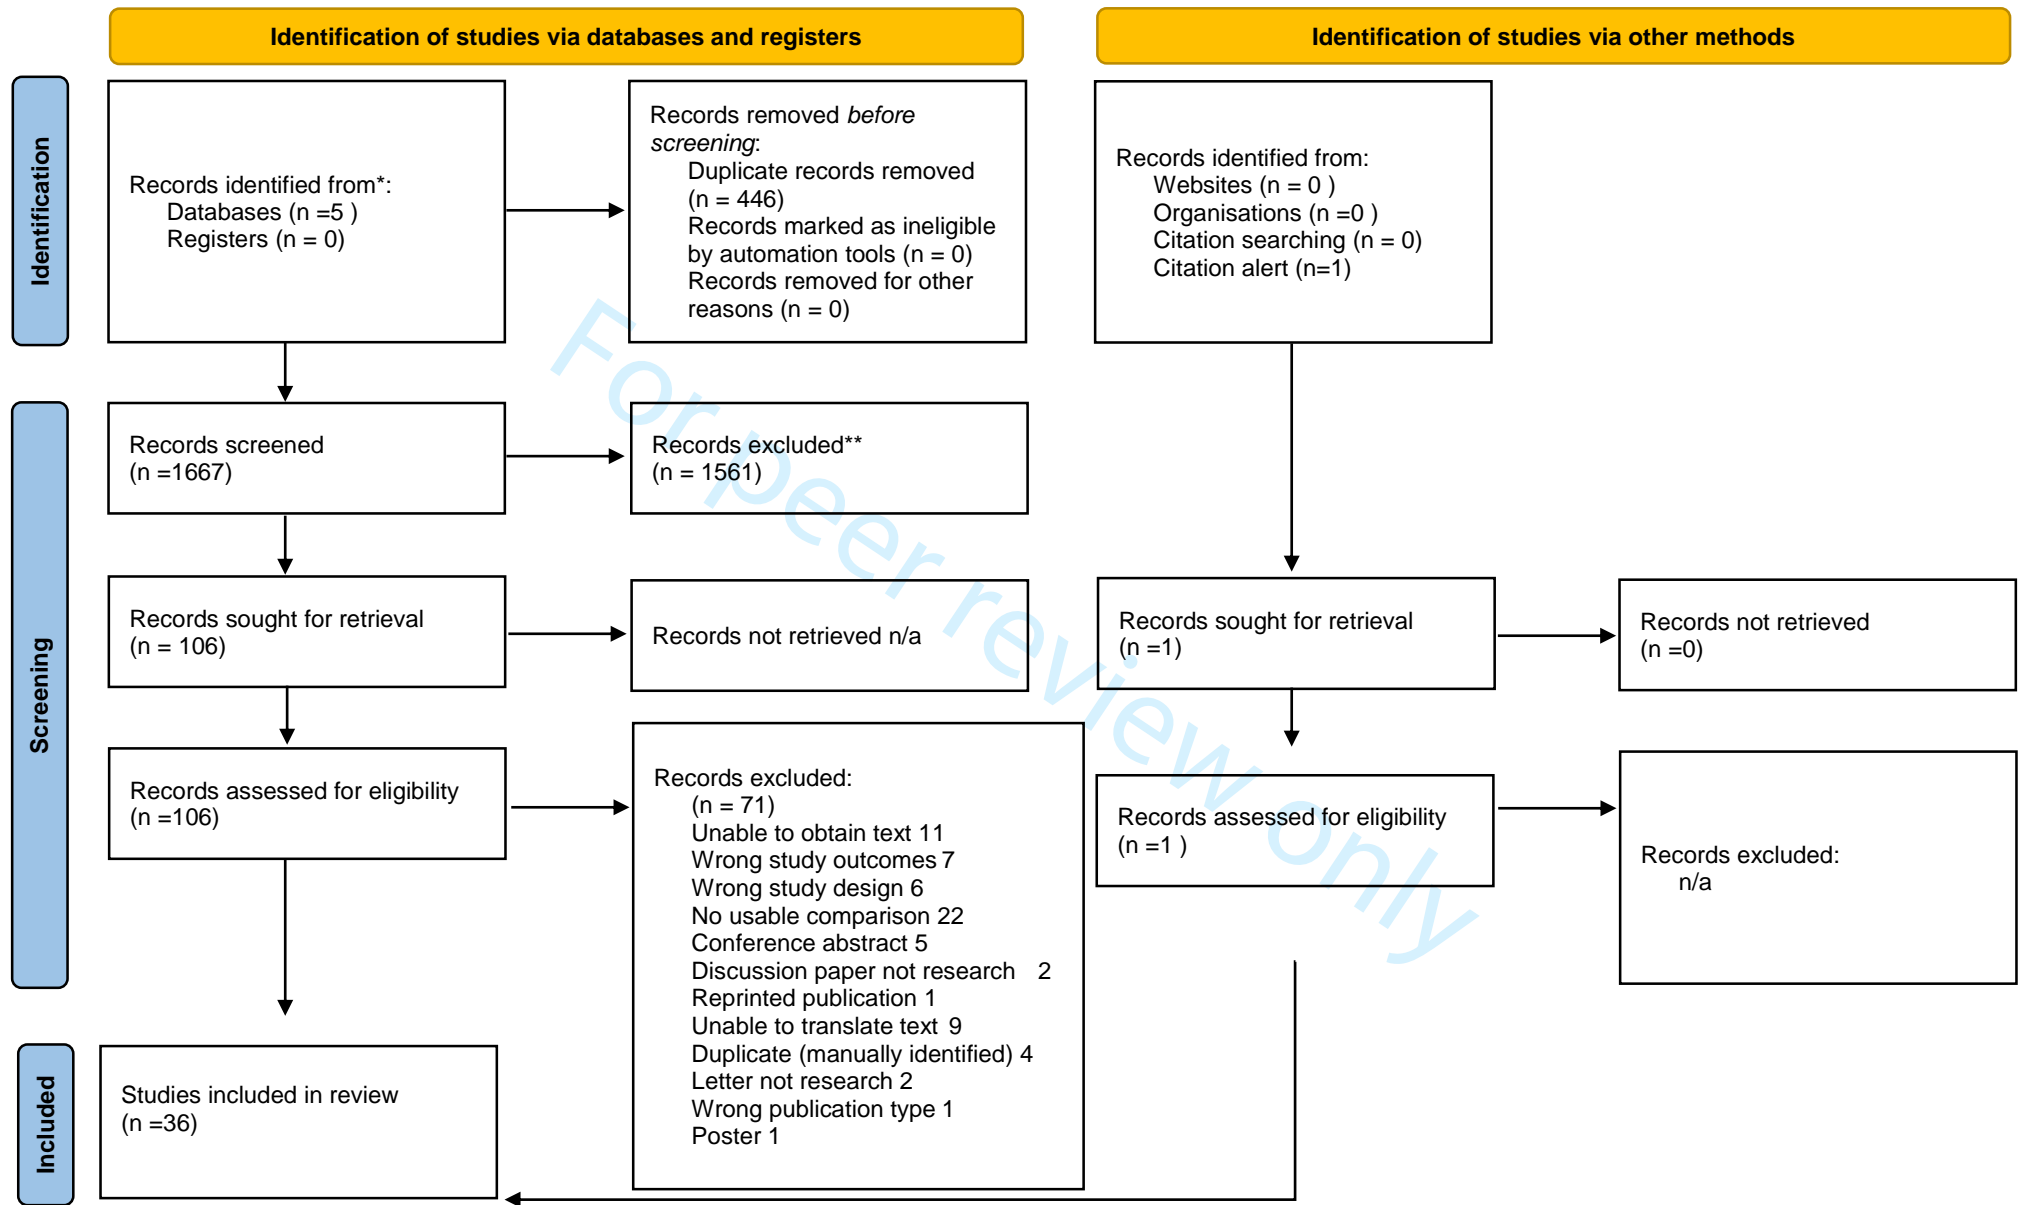



1  
2  
3  
4  
5  
6  
7  
8  
9  
10  
11  
12  
13  
14  
15  
16  
17  
18  
19  
20  
21  
22  
23  
24  
25  
26  
27  
28  
29  
30  
31  
32  
33  
34  
35  
36  
37  
38  
39  
40  
41  
42  
43  
44  
45  
46  
47  
48  
49  
50  
51  
52  
53  
54  
55  
56  
57  
58  
59  
60

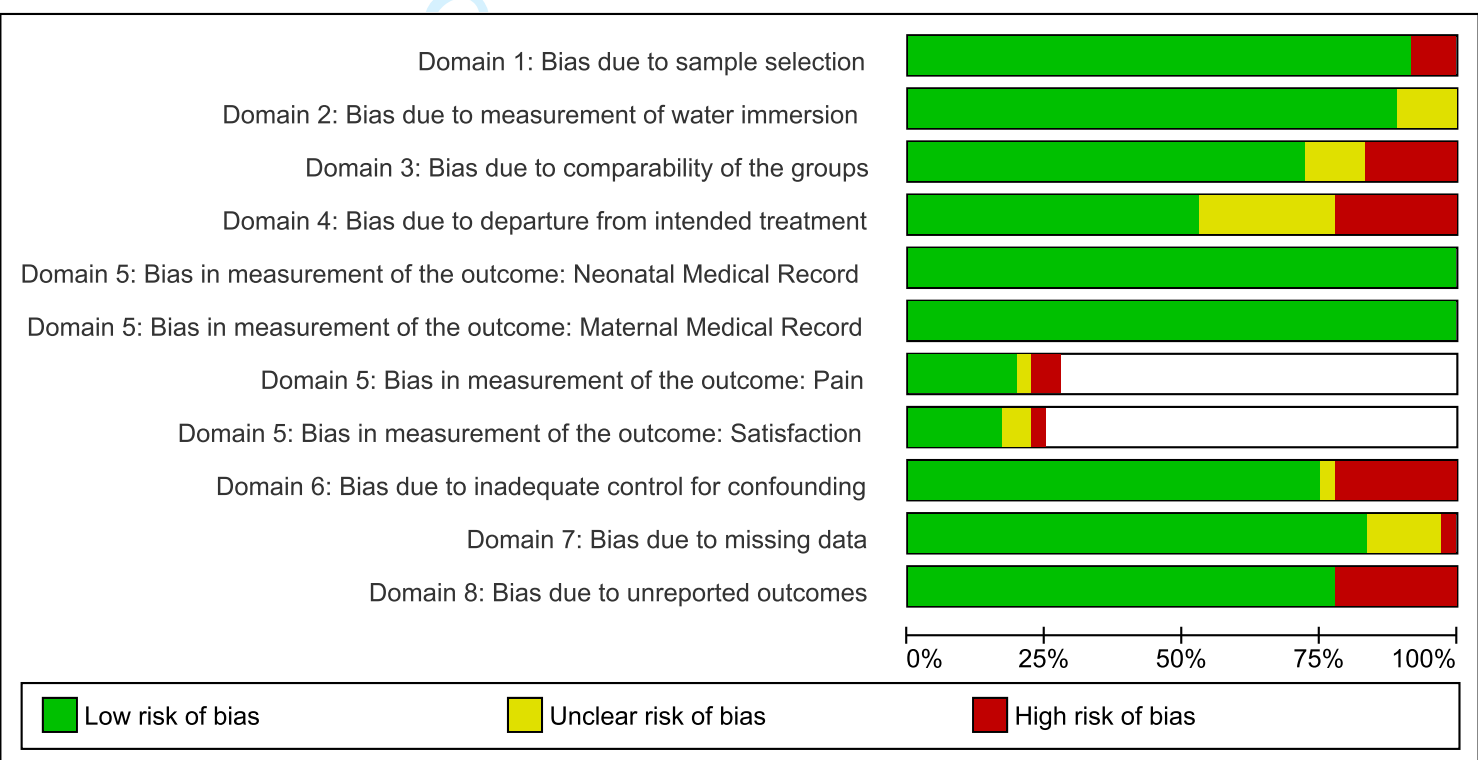

1  
2  
3  
4  
5  
6  
7  
8  
9  
10  
11  
12  
13  
14  
15  
16  
17  
18  
19  
20  
21  
22  
23  
24  
25  
26  
27  
28  
29  
30  
31  
32  
33  
34  
35  
36  
37  
38  
39  
40  
41  
42  
43  
44  
45  
46  
47  
48  
49  
50  
51  
52  
53  
54  
55  
56  
57  
58  
59  
60

For peer review only

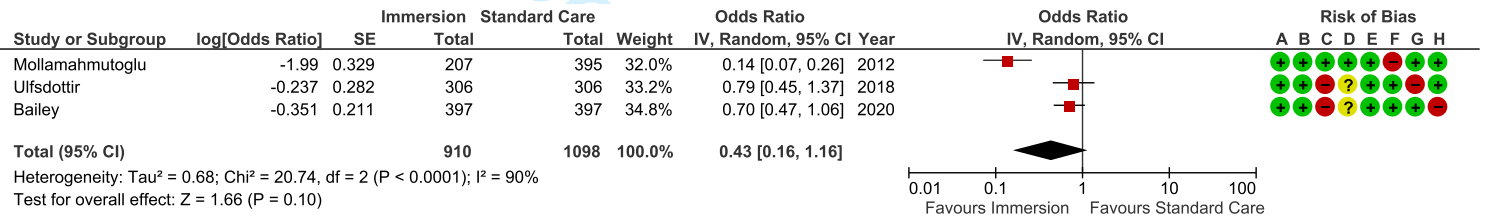

- Risk of bias legend
- (A) Domain 1: Bias due to sample selection
  - (B) Domain 2: Bias due to measurement of water immersion
  - (C) Domain 3: Bias due to comparability of the groups
  - (D) Domain 4: Bias due to departure from intended treatment
  - (E) Domain 5: Bias in measurement of the outcome: Maternal Medical Record
  - (F) Domain 6: Bias due to inadequate control for confounding
  - (G) Domain 7: Bias due to missing data
  - (H) Domain 8: Bias due to unreported outcomes

only

1  
2  
3  
4  
5  
6  
7  
8  
9  
10  
11  
12  
13  
14  
15  
16  
17  
18  
19  
20  
21  
22  
23  
24  
25  
26  
27  
28  
29  
30  
31  
32  
33  
34  
35  
36  
37  
38  
39  
40  
41  
42  
43  
44  
45  
46  
47  
48  
49  
50  
51  
52  
53  
54  
55  
56  
57  
58  
59  
60

For peer review only

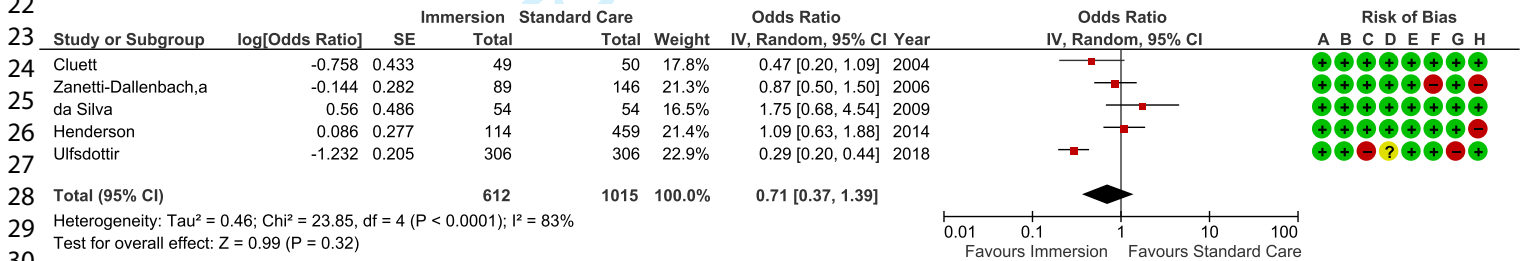

- Risk of bias legend
- (A) Domain 1: Bias due to sample selection
  - (B) Domain 2: Bias due to measurement of water immersion
  - (C) Domain 3: Bias due to comparability of the groups
  - (D) Domain 4: Bias due to departure from intended treatment
  - (E) Domain 5: Bias in measurement of the outcome: Maternal Medical Record
  - (F) Domain 6: Bias due to inadequate control for confounding
  - (G) Domain 7: Bias due to missing data
  - (H) Domain 8: Bias due to unreported outcomes

only

1  
2  
3  
4  
5  
6  
7  
8  
9  
10  
11  
12  
13  
14  
15  
16  
17  
18  
19  
20  
21  
22  
23  
24  
25  
26  
27  
28  
29  
30  
31  
32  
33  
34  
35  
36  
37  
38  
39  
40  
41  
42  
43  
44  
45  
46  
47  
48  
49  
50  
51  
52  
53  
54  
55  
56  
57  
58  
59  
60

For peer review only

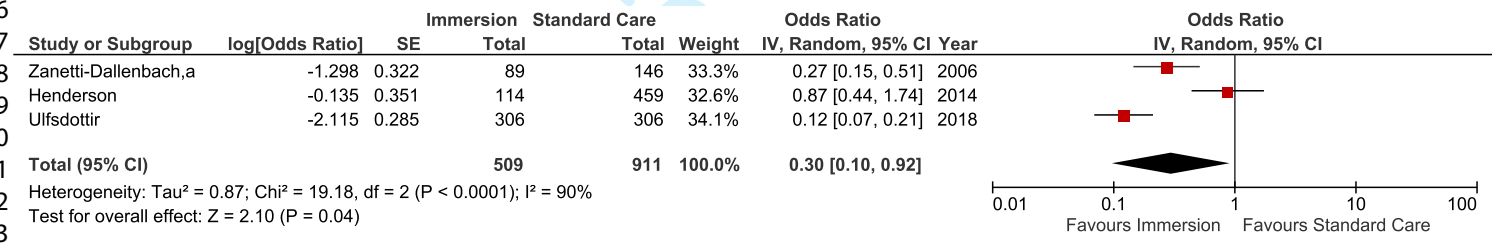

For peer review only

1  
2  
3  
4  
5  
6  
7  
8  
9  
10  
11  
12  
13  
14  
15  
16  
17  
18  
19  
20  
21  
22  
23  
24  
25  
26  
27  
28  
29  
30  
31  
32  
33  
34  
35  
36  
37  
38  
39  
40  
41  
42  
43  
44  
45  
46  
47  
48  
49  
50  
51  
52  
53  
54  
55  
56  
57  
58  
59  
60

For peer review only

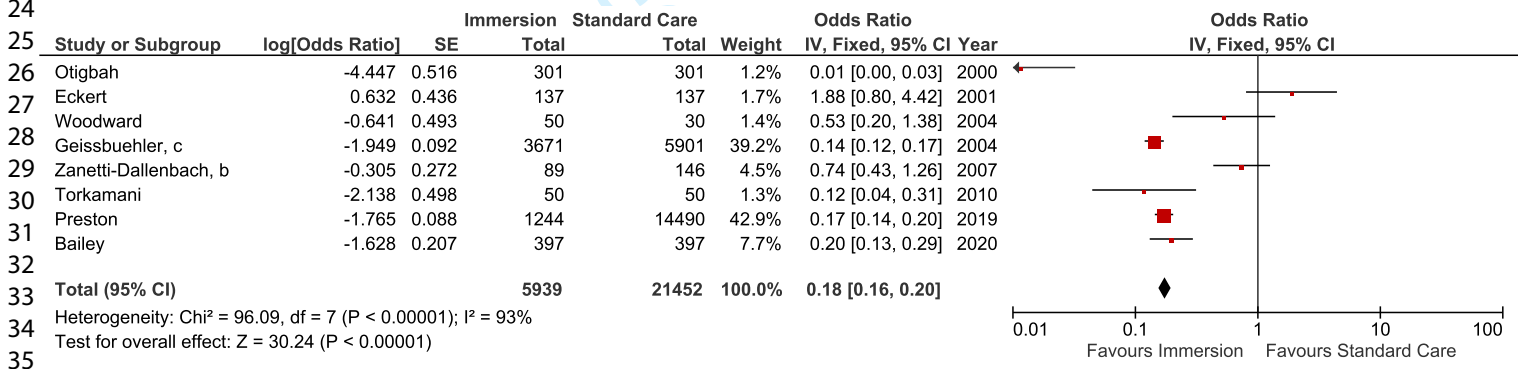

1  
2  
3  
4  
5  
6  
7  
8  
9  
10  
11  
12  
13  
14  
15  
16  
17  
18  
19  
20  
21  
22  
23  
24  
25  
26  
27  
28  
29  
30  
31  
32  
33  
34  
35  
36  
37  
38  
39  
40  
41  
42  
43  
44  
45  
46  
47  
48  
49  
50  
51  
52  
53  
54  
55  
56  
57  
58  
59  
60

For peer review only

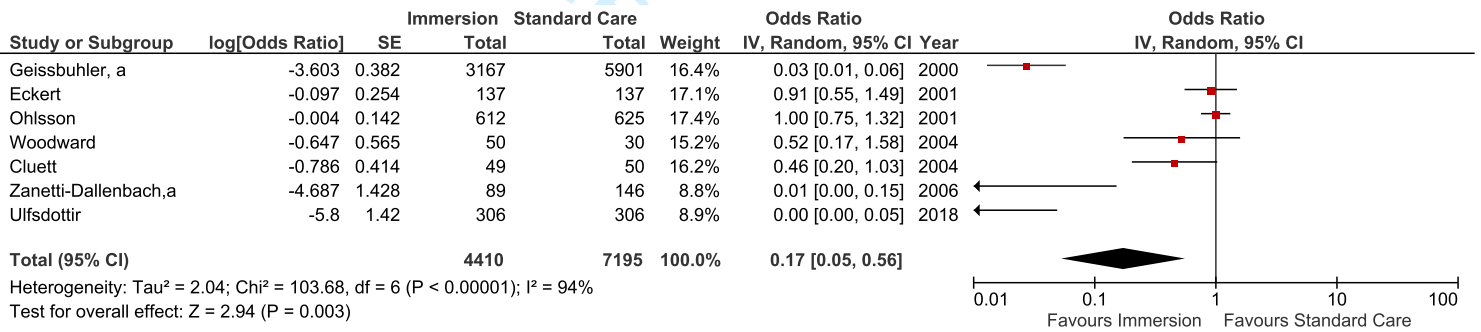

For peer review only

1  
2  
3  
4  
5  
6  
7  
8  
9  
10  
11  
12  
13  
14  
15  
16  
17  
18  
19  
20  
21  
22  
23  
24  
25  
26  
27  
28  
29  
30  
31  
32  
33  
34  
35  
36  
37  
38  
39  
40  
41  
42  
43  
44  
45  
46  
47  
48  
49  
50  
51  
52  
53  
54  
55  
56  
57  
58  
59  
60

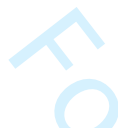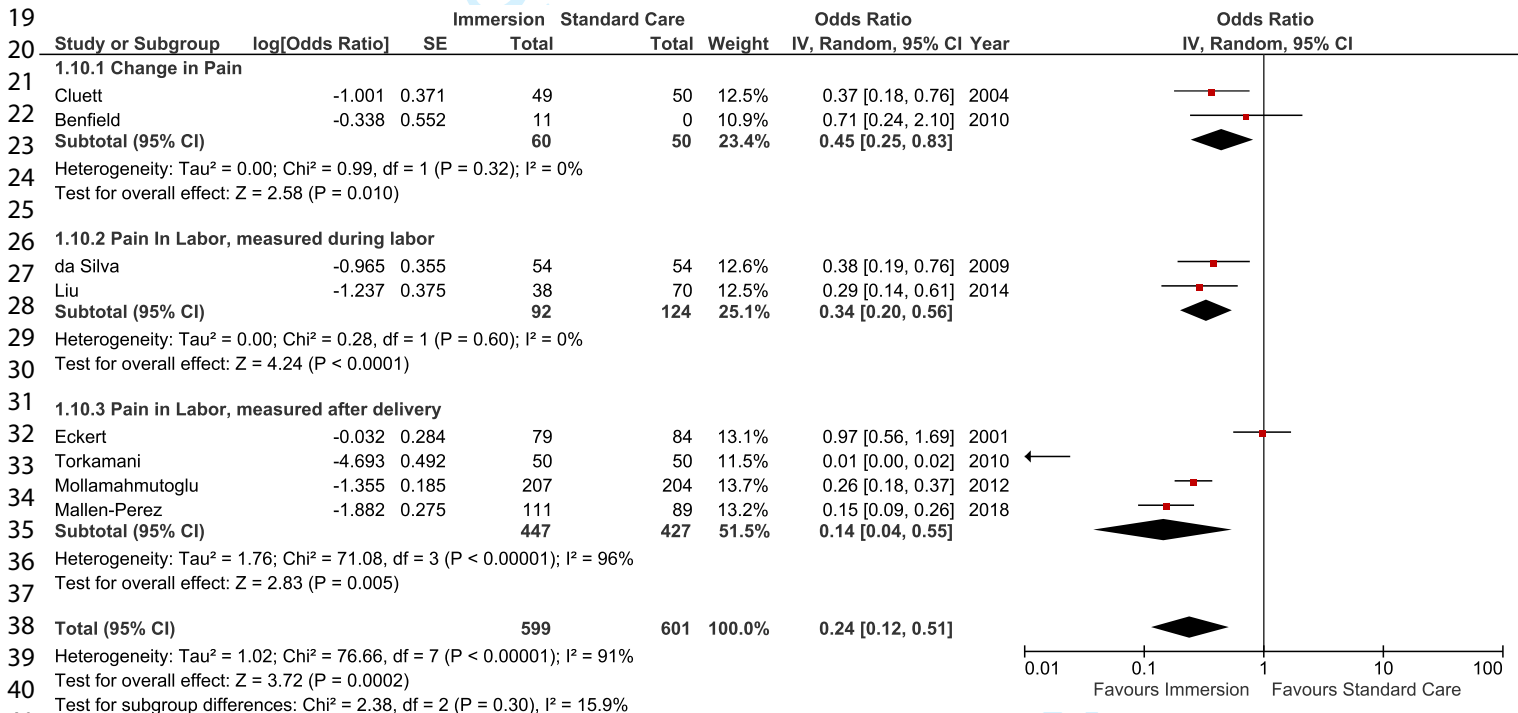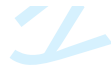

1  
2  
3  
4  
5  
6  
7  
8  
9  
10  
11  
12  
13  
14  
15  
16  
17  
18  
19  
20  
21  
22  
23  
24  
25  
26  
27  
28  
29  
30  
31  
32  
33  
34  
35  
36  
37  
38  
39  
40  
41  
42  
43  
44  
45  
46  
47  
48  
49  
50  
51  
52  
53  
54  
55  
56  
57  
58  
59  
60

For peer review only

| Study or Subgroup     | log[Odds Ratio] | SE    | Immersion   |               | Standard Care |               | Odds Ratio         |                     | Year |
|-----------------------|-----------------|-------|-------------|---------------|---------------|---------------|--------------------|---------------------|------|
|                       |                 |       | Total       | Weight        | Total         | Weight        | IV, Random, 95% CI | IV, Random, 95% CI  |      |
| Eckert                | -0.271          | 0.528 | 79          | 15.2%         | 40            | 15.2%         | 0.76               | [0.27, 2.15]        | 2001 |
| Ohlsson               | 0.564           | 0.403 | 612         | 21.8%         | 625           | 21.8%         | 1.76               | [0.80, 3.87]        | 2001 |
| Cluett                | -0.368          | 0.516 | 49          | 15.7%         | 50            | 15.7%         | 0.69               | [0.25, 1.90]        | 2004 |
| Woodward              | -0.245          | 0.801 | 50          | 7.8%          | 30            | 7.8%          | 0.78               | [0.16, 3.76]        | 2004 |
| Henderson             | -0.56           | 1.074 | 114         | 4.6%          | 459           | 4.6%          | 0.57               | [0.07, 4.69]        | 2014 |
| Liu                   | -1.172          | 0.543 | 38          | 14.5%         | 70            | 14.5%         | 0.31               | [0.11, 0.90]        | 2014 |
| Barry                 | 0.486           | 0.58  | 190         | 13.2%         | 190           | 13.2%         | 1.63               | [0.52, 5.07]        | 2020 |
| Neiman                | 0.675           | 0.833 | 58          | 7.3%          | 111           | 7.3%          | 1.96               | [0.38, 10.05]       | 2020 |
| <b>Total (95% CI)</b> |                 |       | <b>1190</b> | <b>100.0%</b> | <b>1575</b>   | <b>100.0%</b> | <b>0.92</b>        | <b>[0.58, 1.48]</b> |      |

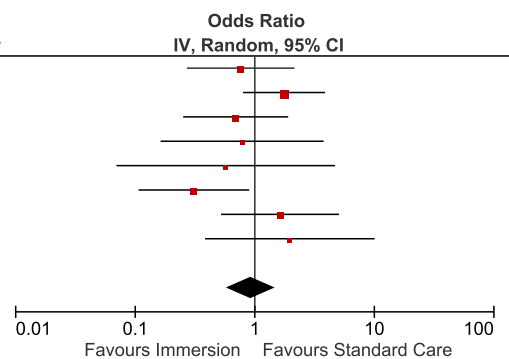



1  
2  
3  
4  
5  
6  
7  
8  
9  
10  
11  
12  
13  
14  
15  
16  
17  
18  
19  
20  
21  
22  
23  
24  
25  
26  
27  
28  
29  
30  
31  
32  
33  
34  
35  
36  
37  
38  
39  
40  
41  
42  
43  
44  
45  
46  
47  
48  
49  
50  
51  
52  
53  
54  
55  
56  
57  
58  
59  
60

For peer review only

| Study or Subgroup     | log[Odds Ratio] |       | Immersion    | Standard Care | Weight        | Odds Ratio         |                     | Year |
|-----------------------|-----------------|-------|--------------|---------------|---------------|--------------------|---------------------|------|
|                       |                 | SE    | Total        | Total         |               | IV, Random, 95% CI | IV, Random, 95% CI  |      |
| Otigbah               | 0.227           | 0.676 | 301          | 301           | 13.6%         | 1.25               | [0.33, 4.72]        | 2000 |
| Geissbuehler, c       | -0.492          | 0.479 | 3617         | 5901          | 18.8%         | 0.61               | [0.24, 1.56]        | 2004 |
| Zanetti-Dallenbach,a  | 1.11            | 1.233 | 89           | 133           | 5.9%          | 3.03               | [0.27, 34.01]       | 2006 |
| Menakaya              | 1.103           | 1.636 | 219          | 219           | 3.7%          | 3.01               | [0.12, 74.40]       | 2013 |
| Preston               | 0.069           | 0.371 | 1244         | 14490         | 22.2%         | 1.07               | [0.52, 2.22]        | 2019 |
| Snapp                 | -0.911          | 0.094 | 10252        | 16432         | 29.9%         | 0.40               | [0.33, 0.48]        | 2019 |
| Neiman                | 1.368           | 1.236 | 58           | 111           | 5.9%          | 3.93               | [0.35, 44.28]       | 2020 |
| <b>Total (95% CI)</b> |                 |       | <b>15780</b> | <b>37587</b>  | <b>100.0%</b> | <b>0.88</b>        | <b>[0.46, 1.69]</b> |      |

Heterogeneity: Tau<sup>2</sup> = 0.37; Chi<sup>2</sup> = 16.43, df = 6 (P = 0.01); I<sup>2</sup> = 63%  
 Test for overall effect: Z = 0.39 (P = 0.69)

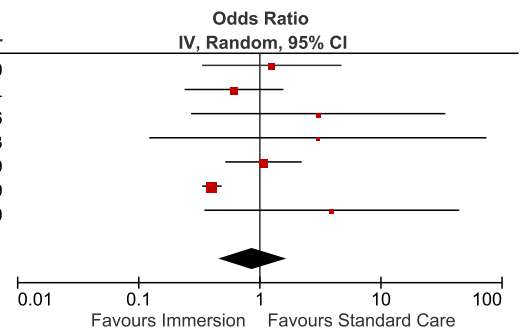

For peer review only

1  
2  
3  
4  
5  
6  
7  
8  
9  
10  
11  
12  
13  
14  
15  
16  
17  
18  
19  
20  
21  
22  
23  
24  
25  
26  
27  
28  
29  
30  
31  
32  
33  
34  
35  
36  
37  
38  
39  
40  
41  
42  
43  
44  
45  
46  
47  
48  
49  
50  
51  
52  
53  
54  
55  
56  
57  
58  
59  
60

For

Only

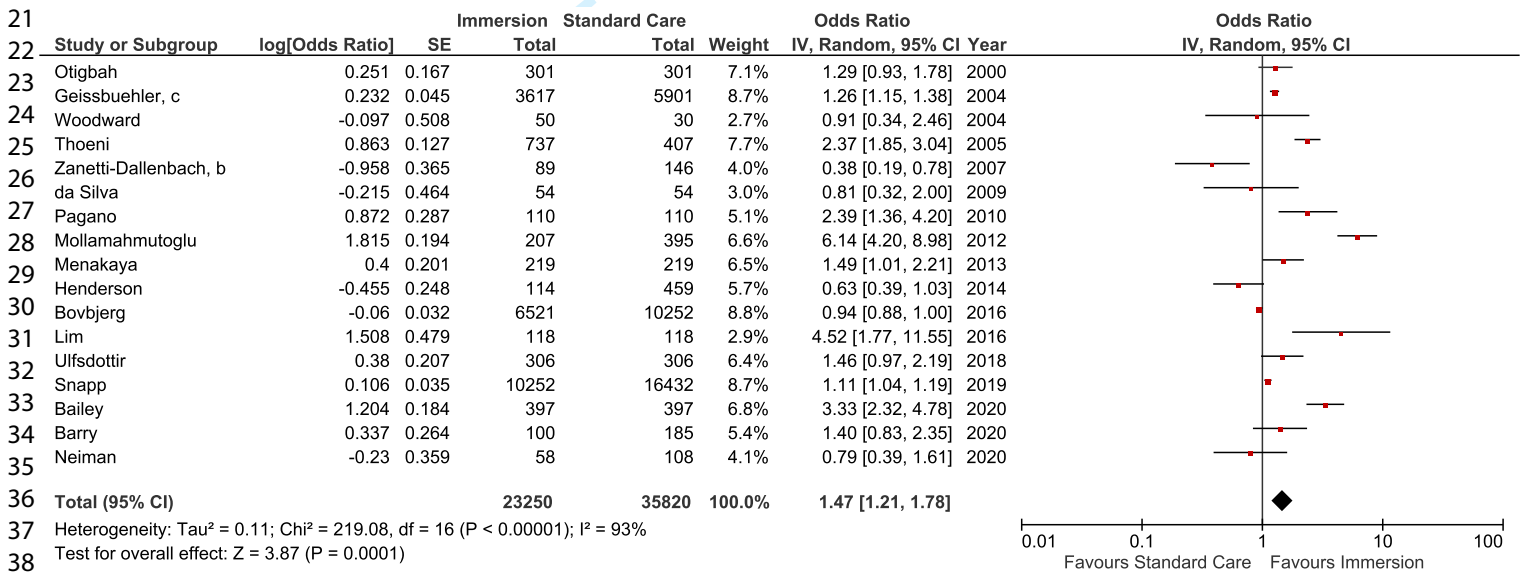

1  
2  
3  
4  
5  
6  
7  
8  
9  
10  
11  
12  
13  
14  
15  
16  
17  
18  
19  
20  
21  
22  
23  
24  
25  
26  
27  
28  
29  
30  
31  
32  
33  
34  
35  
36  
37  
38  
39  
40  
41  
42  
43  
44  
45  
46  
47  
48  
49  
50  
51  
52  
53  
54  
55  
56  
57  
58  
59  
60

For peer review only

| Study or Subgroup     | Immersion       |       | Standard Care |              | Weight        | Odds Ratio         |                     | Year |
|-----------------------|-----------------|-------|---------------|--------------|---------------|--------------------|---------------------|------|
|                       | log[Odds Ratio] | SE    | Total         | Total        |               | IV, Random, 95% CI | Odds Ratio          |      |
| Otigbah               | -0.518          | 0.735 | 301           | 301          | 3.9%          | 0.60               | [0.14, 2.52]        | 2000 |
| Ohlsson               | 0.273           | 0.291 | 612           | 625          | 9.4%          | 1.31               | [0.74, 2.32]        | 2001 |
| Eckert                | 0.939           | 0.846 | 137           | 137          | 3.2%          | 2.56               | [0.49, 13.43]       | 2001 |
| Geissbuehler, c       | -0.467          | 0.131 | 3617          | 5901         | 11.9%         | 0.63               | [0.48, 0.81]        | 2004 |
| Thoeni                | -0.034          | 0.63  | 737           | 407          | 4.8%          | 0.97               | [0.28, 3.32]        | 2005 |
| Zanetti-Dallenbach, b | -0.613          | 1.639 | 89            | 146          | 1.0%          | 0.54               | [0.02, 13.46]       | 2007 |
| Menakaya              | -1.4            | 1.122 | 219           | 219          | 2.0%          | 0.25               | [0.03, 2.22]        | 2013 |
| Haslinger             | -0.146          | 0.724 | 228           | 5031         | 4.0%          | 0.86               | [0.21, 3.57]        | 2015 |
| Bovbjerg              | -0.397          | 0.231 | 6521          | 10252        | 10.4%         | 0.67               | [0.43, 1.06]        | 2016 |
| Ulfssdottir           | 0               | 0.583 | 306           | 306          | 5.3%          | 1.00               | [0.32, 3.14]        | 2018 |
| Jacoby                | -1.078          | 0.272 | 1716          | 21320        | 9.7%          | 0.34               | [0.20, 0.58]        | 2019 |
| Preston               | 0.742           | 0.168 | 1244          | 6471         | 11.4%         | 2.10               | [1.51, 2.92]        | 2019 |
| Bailey                | -0.249          | 0.409 | 397           | 397          | 7.5%          | 0.78               | [0.35, 1.74]        | 2020 |
| Barry                 | -0.24           | 0.72  | 100           | 185          | 4.0%          | 0.79               | [0.19, 3.23]        | 2020 |
| Hodgson               | -0.242          | 0.164 | 2567          | 23201        | 11.4%         | 0.79               | [0.57, 1.08]        | 2020 |
| <b>Total (95% CI)</b> |                 |       | <b>18791</b>  | <b>74899</b> | <b>100.0%</b> | <b>0.84</b>        | <b>[0.59, 1.18]</b> |      |

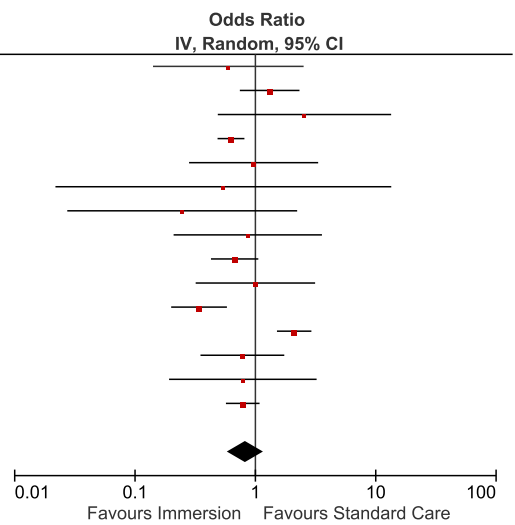

Heterogeneity:  $\tau^2 = 0.24$ ;  $\chi^2 = 52.62$ ,  $df = 14$  ( $P < 0.00001$ );  $I^2 = 73\%$   
 Test for overall effect:  $Z = 1.03$  ( $P = 0.30$ )

1  
2  
3  
4  
5  
6  
7  
8  
9  
10  
11  
12  
13  
14  
15  
16  
17  
18  
19  
20  
21  
22  
23  
24  
25  
26  
27  
28  
29  
30  
31  
32  
33  
34  
35  
36  
37  
38  
39  
40  
41  
42  
43  
44  
45  
46  
47  
48  
49  
50  
51  
52  
53  
54  
55  
56  
57  
58  
59  
60

For peer review only

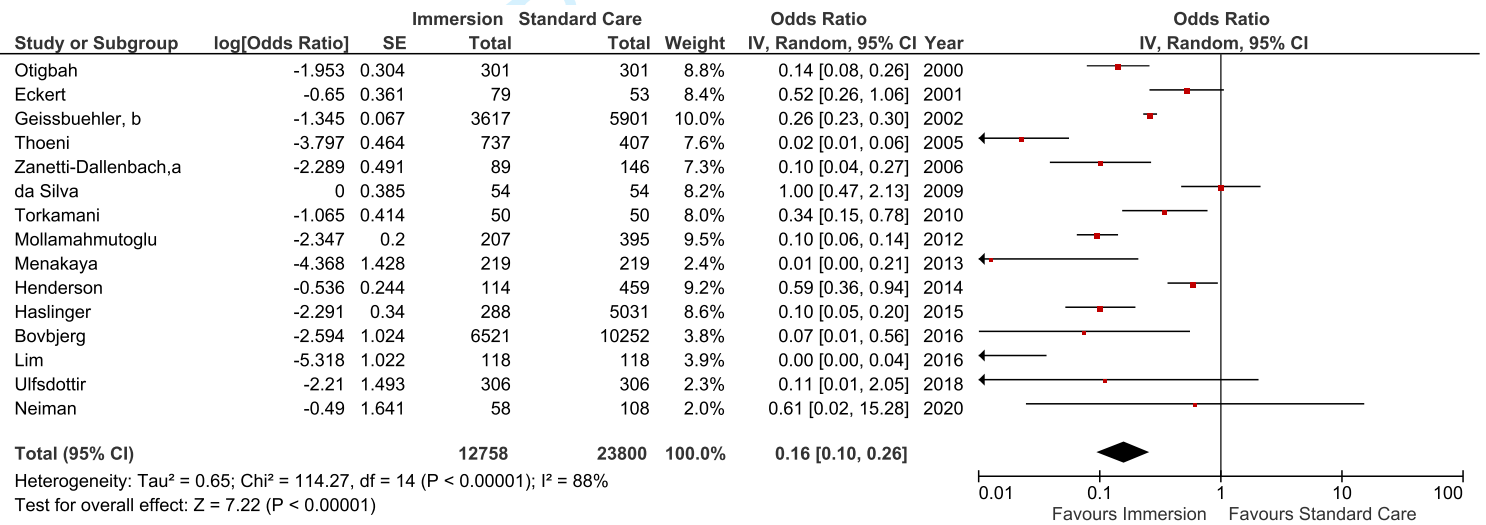

1  
2  
3  
4  
5  
6  
7  
8  
9  
10  
11  
12  
13  
14  
15  
16  
17  
18  
19  
20  
21  
22  
23  
24  
25  
26  
27  
28  
29  
30  
31  
32  
33  
34  
35  
36  
37  
38  
39  
40  
41  
42  
43  
44  
45  
46  
47  
48  
49  
50  
51  
52  
53  
54  
55  
56  
57  
58  
59  
60

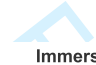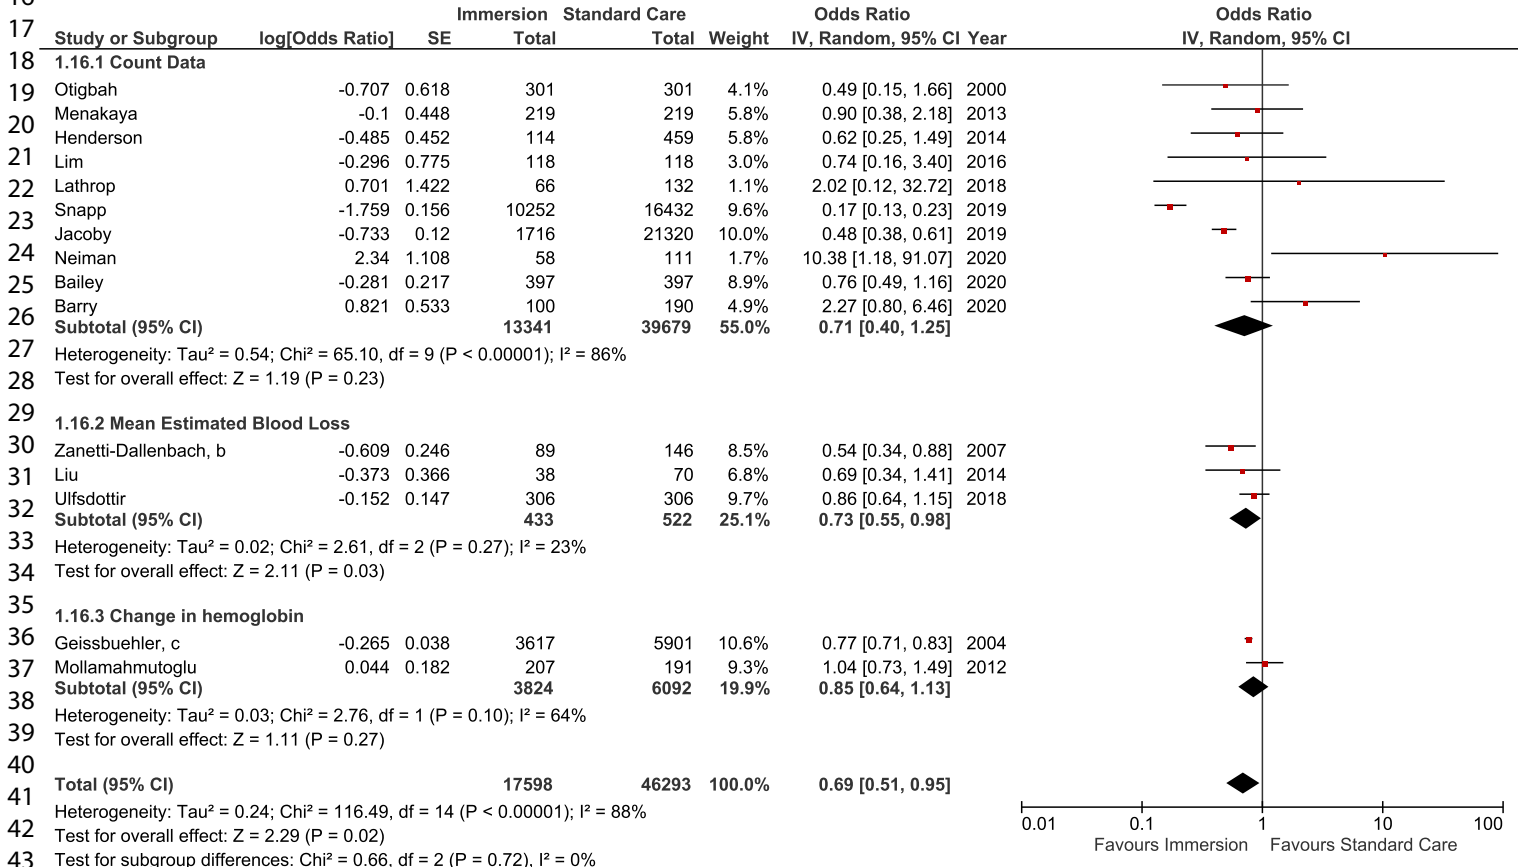

1  
2  
3  
4  
5  
6  
7  
8  
9  
10  
11  
12  
13  
14  
15  
16  
17  
18  
19  
20  
21  
22  
23  
24  
25  
26  
27  
28  
29  
30  
31  
32  
33  
34  
35  
36  
37  
38  
39  
40  
41  
42  
43  
44  
45  
46  
47  
48  
49  
50  
51  
52  
53  
54  
55  
56  
57  
58  
59  
60

For peer review only

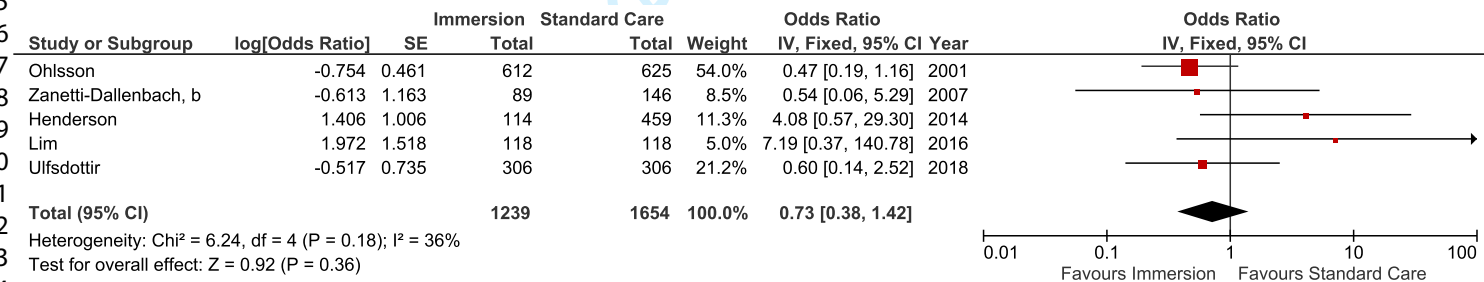

For peer review only

1  
2  
3  
4  
5  
6  
7  
8  
9  
10  
11  
12  
13  
14  
15  
16  
17  
18  
19  
20  
21  
22  
23  
24  
25  
26  
27  
28  
29  
30  
31  
32  
33  
34  
35  
36  
37  
38  
39  
40  
41  
42  
43  
44  
45  
46  
47  
48  
49  
50  
51  
52  
53  
54  
55  
56  
57  
58  
59  
60

For peer review only

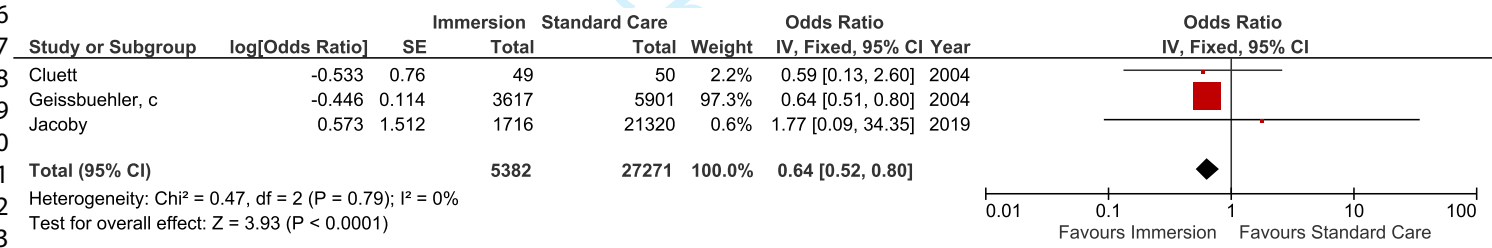

1  
2  
3  
4  
5  
6  
7  
8  
9  
10  
11  
12  
13  
14  
15  
16  
17  
18  
19  
20  
21  
22  
23  
24  
25  
26  
27  
28  
29  
30  
31  
32  
33  
34  
35  
36  
37  
38  
39  
40  
41  
42  
43  
44  
45  
46  
47  
48  
49  
50  
51  
52  
53  
54  
55  
56  
57  
58  
59  
60

For peer review only

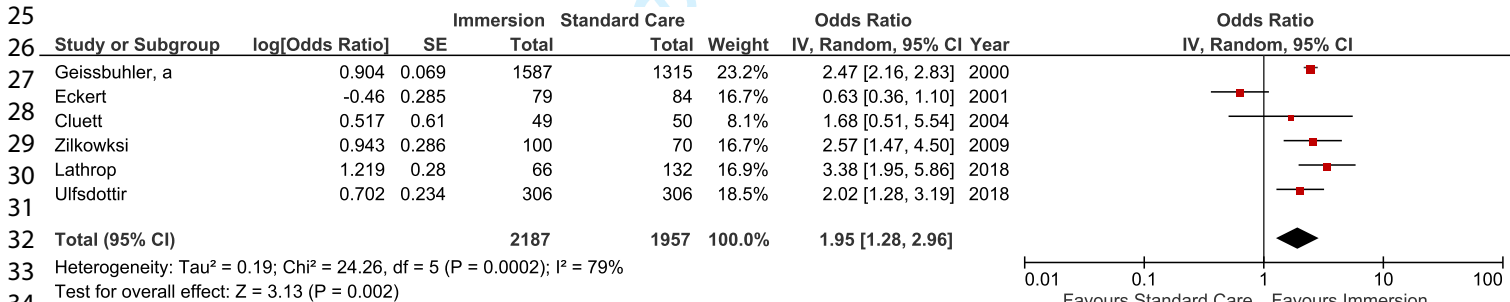



1  
2  
3  
4  
5  
6  
7  
8  
9  
10  
11  
12  
13  
14  
15  
16  
17  
18  
19  
20  
21  
22  
23  
24  
25  
26  
27  
28  
29  
30  
31  
32  
33  
34  
35  
36  
37  
38  
39  
40  
41  
42  
43  
44  
45  
46  
47  
48  
49  
50  
51  
52  
53  
54  
55  
56  
57  
58  
59  
60

FOR

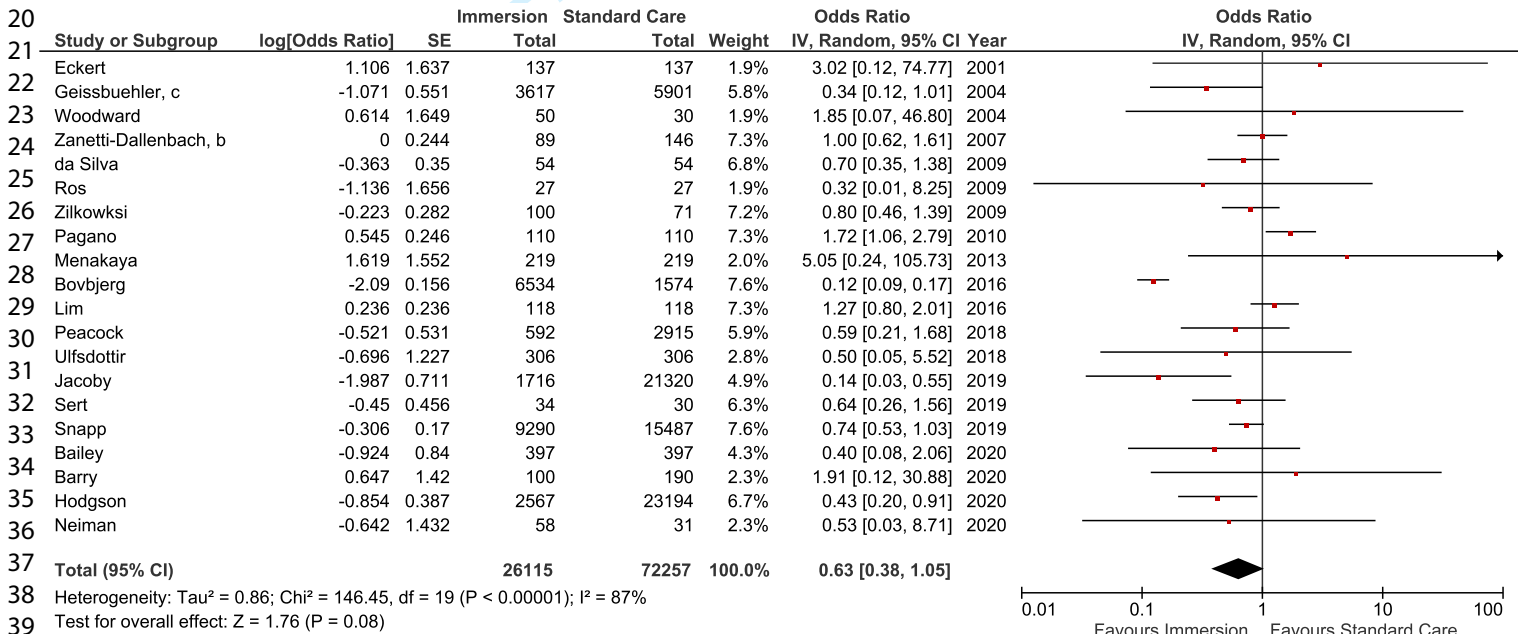

1  
2  
3  
4  
5  
6  
7  
8  
9  
10  
11  
12  
13  
14  
15  
16  
17  
18  
19  
20  
21  
22  
23  
24  
25  
26  
27  
28  
29  
30  
31  
32  
33  
34  
35  
36  
37  
38  
39  
40  
41  
42  
43  
44  
45  
46  
47  
48  
49  
50  
51  
52  
53  
54  
55  
56  
57  
58  
59  
60

For peer review only

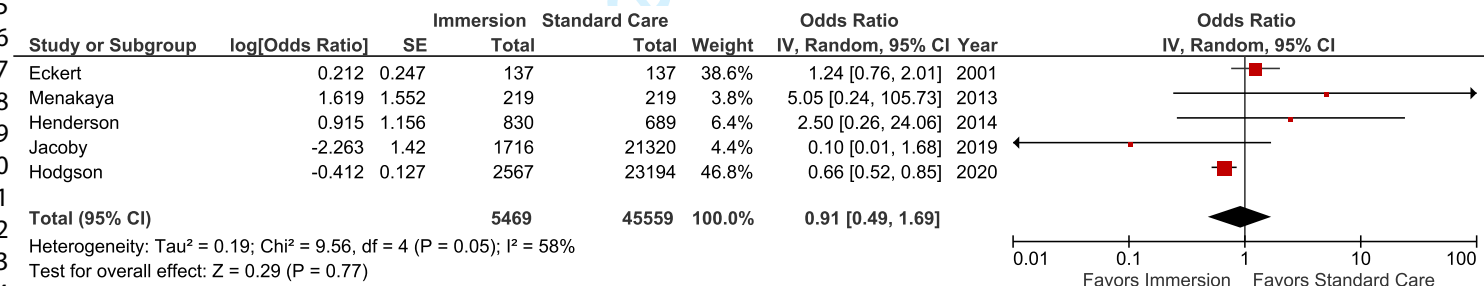

For peer review only

1  
2  
3  
4  
5  
6  
7  
8  
9  
10  
11  
12  
13  
14  
15  
16  
17  
18  
19  
20  
21  
22  
23  
24  
25  
26  
27  
28  
29  
30  
31  
32  
33  
34  
35  
36  
37  
38  
39  
40  
41  
42  
43  
44  
45  
46  
47  
48  
49  
50  
51  
52  
53  
54  
55  
56  
57  
58  
59  
60

For peer

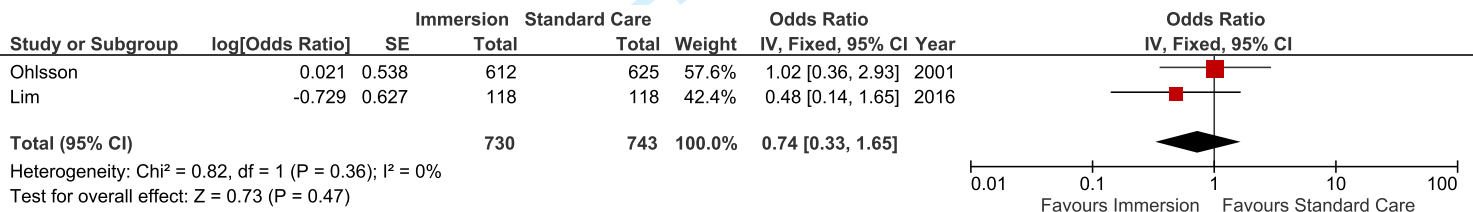

ew only

1  
2  
3  
4  
5  
6  
7  
8  
9  
10  
11  
12  
13  
14  
15  
16  
17  
18  
19  
20  
21  
22  
23  
24  
25  
26  
27  
28  
29  
30  
31  
32  
33  
34  
35  
36  
37  
38  
39  
40  
41  
42  
43  
44  
45  
46  
47  
48  
49  
50  
51  
52  
53  
54  
55  
56  
57  
58  
59  
60

For peer review only

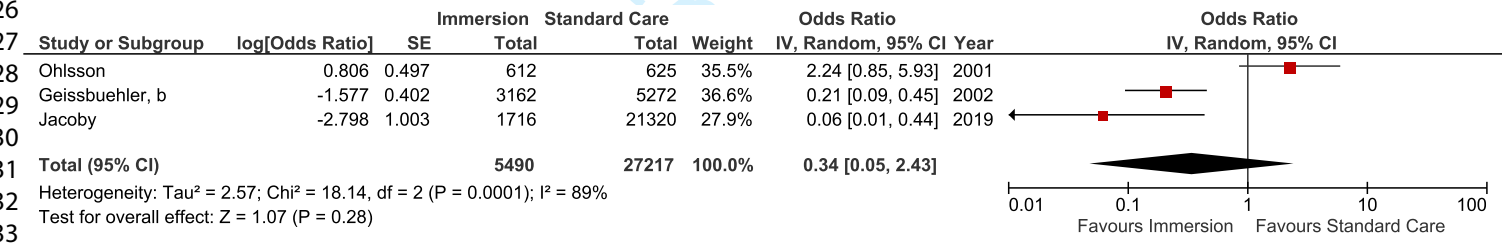

1  
2  
3  
4  
5  
6  
7  
8  
9  
10  
11  
12  
13  
14  
15  
16  
17  
18  
19  
20  
21  
22  
23  
24  
25  
26  
27  
28  
29  
30  
31  
32  
33  
34  
35  
36  
37  
38  
39  
40  
41  
42  
43  
44  
45  
46  
47  
48  
49  
50  
51  
52  
53  
54  
55  
56  
57  
58  
59  
60

For peer review only

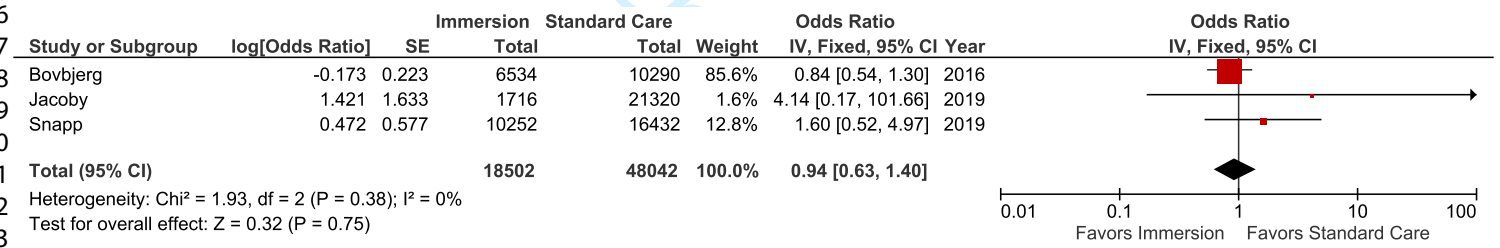

1  
2  
3  
4  
5  
6  
7  
8  
9  
10  
11  
12  
13  
14  
15  
16  
17  
18  
19  
20  
21  
22  
23  
24  
25  
26  
27  
28  
29  
30  
31  
32  
33  
34  
35  
36  
37  
38  
39  
40  
41  
42  
43  
44  
45  
46  
47  
48  
49  
50  
51  
52  
53  
54  
55  
56  
57  
58  
59  
60

For peer review only

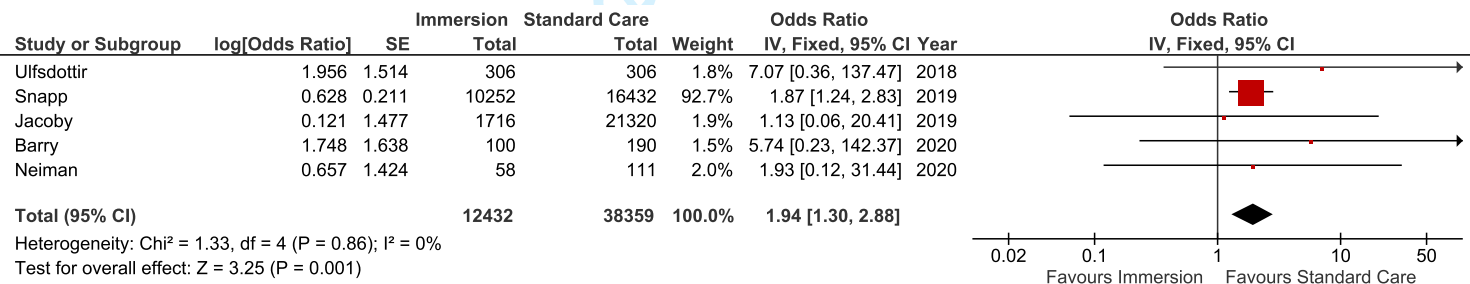

For peer review only

1  
2  
3  
4  
5  
6  
7  
8  
9  
10  
11  
12  
13  
14  
15  
16  
17  
18  
19  
20  
21  
22  
23  
24  
25  
26  
27  
28  
29  
30  
31  
32  
33  
34  
35  
36  
37  
38  
39  
40  
41  
42  
43  
44  
45  
46  
47  
48  
49  
50  
51  
52  
53  
54  
55  
56  
57  
58  
59  
60

For peer review only

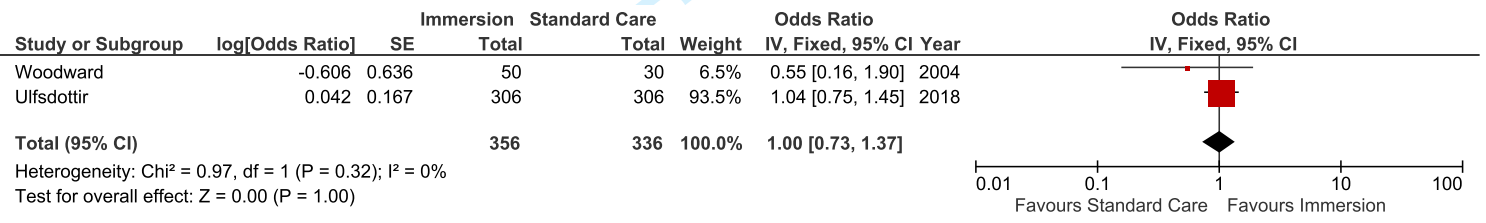

**Predesigned search terms**

|                             |                                                                                                                                                                                                                                                                                                                                                                                                                                                                                                                                                                  |
|-----------------------------|------------------------------------------------------------------------------------------------------------------------------------------------------------------------------------------------------------------------------------------------------------------------------------------------------------------------------------------------------------------------------------------------------------------------------------------------------------------------------------------------------------------------------------------------------------------|
| Population                  | Primip* OR nullip* OR multip* OR term gestation* OR intra?partum OR birth* OR childbirth OR labo?r* OR parturition OR planned place birth* OR childbearing wom?n OR expectant wom?n OR expectant mother* OR labo?ring wom?n OR wom?n in labo?r                                                                                                                                                                                                                                                                                                                   |
| Intervention/Exposure water | Water OR water?birth OR water birth OR water immersion OR hydrotherapy OR birth* pool OR birth in water OR birth in pool                                                                                                                                                                                                                                                                                                                                                                                                                                         |
| Interventions during labour | Rupture membrane* OR spontaneous* OR artificial* OR augment*OR induc* OR epidural* OR oxytocin infusion OR opioid injection* OR transfer* OR transfer obstetric unit* OR electronic monitor* OR EFM OR cardiotocograph* OR auscultat* OR intermediate auscultate* OR physiological third stage OR expectant third stage OR physiological 3 <sup>rd</sup> stage OR expectant 3 <sup>rd</sup> stage OR managed third stage OR managed 3 <sup>rd</sup> stage OR active third stage OR active 3 <sup>rd</sup> stage OR placenta delivery OR delivery of the placenta |
| Outcomes Maternal           | spontaneous vaginal birth* OR spont* delivery OR perine* OR perineal OR trauma* OR anal sphincter OR OASIS OR obstetric anal sphincter injur* OR episiotom* OR postpartum h?emorrhage* OR PPH OR h?emorrhage* OR blood transfusion* OR blood product* OR red blood cell* OR infection* OR sepsis OR admission* OR readmission* OR pain OR numerical rating scales OR NRS OR visual analog scales OR VAS OR maternal health OR wom?n health                                                                                                                       |
| Outcomes Neonatal           | birthweight* OR gestation* OR Apgar score* OR resus* OR resuscitation OR ventilation* OR respiratory OR distress* OR transfer* OR transfer obstetric unit* OR paed* OR neonat* OR neonatal unit OR special care unit* OR antibiotic* OR admission* OR readmission* OR breastfeeding OR infection* OR sepsis OR antibiotic* OR new?born health OR neonat* health                                                                                                                                                                                                  |
| Time                        | Intrapartum OR intra?partum OR birth* OR child?birth OR labo?r* OR post?natal OR post?partum OR puerperium*                                                                                                                                                                                                                                                                                                                                                                                                                                                      |

**Pilot search terms**

Population: Primip\* OR nullip\* OR multip\* OR parturient OR birth\* wom?n

Exposure : Water OR waterbirth OR water birth OR water immersion OR immersion OR hydrotherapy OR birth\* pool OR tub

Time: Intrapartum OR intra-partum OR birth\* OR childbirth OR labour\* OR labor\* OR parturition OR dilatation OR expulsion OR delivery of the placenta OR first stage OR second stage OR third stage



**Librarian search term input***BNI (via Proquest)*

S1 ab(Intrapartum OR intra-partum OR labor OR laboring OR labour OR labouring OR deliver\* OR childbirth\* OR birth\* OR parturition) OR ti(Intrapartum OR intra-partum OR labor OR laboring OR labour OR labouring OR deliver\* OR childbirth\* OR birth\* OR parturition) 98,180

S2 MAINSUBJECT.EXACT("Childbirth & labor") 12,308

S3 S1 OR S2 100,458

S4 ab((Water N/3 birth) OR waterbirth OR water-birth OR (birth\* N/3 tub) OR (birth\*N/3 pool\*) OR (water N/3 immersion)) OR ti((Water N/3 birth) OR waterbirth OR water-birth OR (birth\* N/3 tub) OR (birth\* N/3 pool\*) OR (water N/3 immersion)) 501

S5 S3 AND S4 424

*CINAHL (via Ebscohost)*

S1 TI ( Intrapartum OR intra-partum OR labor OR laboring OR labour OR labouring OR deliver\* OR childbirth\* OR birth\* OR parturition ) OR AB ( Intrapartum OR intra-partum OR labor OR laboring OR labour OR labouring OR deliver\* OR childbirth\* OR birth\* OR parturition ) 252,840

S2 (MH "Childbirth+") OR (MH "Labor+") 36,176

S3 S1 OR S2 263,207

S4 TI ( (Water N3 birth) OR waterbirth OR water-birth OR (birth\* N3 tub) OR (birth\* N3 pool\*) OR (water N3 immersion) ) OR AB ( (Water N3 birth) OR waterbirth OR water-birth OR (birth\* N3 tub) OR (birth\* N3 pool\*) OR (water N3 immersion) ) 1,264

S5 (MH "Water Birth") 600

S6 S4 OR S5 1,572

S7 S3 AND S6 824

*PsycInfo (via Ebscohost)*

S1 TI ( Intrapartum OR intra-partum OR labor OR laboring OR labour OR labouring OR deliver\* OR childbirth\* OR birth\* OR parturition ) OR AB ( Intrapartum OR intra-partum OR labor OR laboring OR labour OR labouring OR deliver\* OR childbirth\* OR birth\* OR parturition ) 187,428

S2 DE "Intrapartum Period" OR DE "Birth" OR DE "Labor (Childbirth)" OR DE "Natural Childbirth" OR DE "Premature Birth" 14,070

S3 S1 OR S2 190,598

S4 TI ( (Water N3 birth) OR waterbirth OR water-birth OR (birth\* N3 tub) OR (birth\* N3 pool\*) OR (water N3 immersion) ) OR AB ( (Water N3 birth) OR waterbirth OR water-birth OR (birth\* N3 tub) OR (birth\* N3 pool\*) OR (water N3 immersion) ) 461

S5 S3 AND S4 68

*Medline (via Ebscohost)*

S1 TI ( Intrapartum OR intra-partum OR labor OR laboring OR labour OR labouring OR deliver\* OR childbirth\* OR birth\* OR parturition ) OR AB ( Intrapartum OR intra-partum OR labor OR laboring OR labour OR labouring OR deliver\* OR childbirth\* OR birth\* OR parturition ) 971,137

S2 (MH "Parturition+") OR (MH "Labor, Obstetric+") 60,186

S3 S1 OR S2 989,569

1 S4 TI ( (Water N3 birth) OR waterbirth OR water-birth OR (birth\* N3 tub) OR  
 2 (birth\* N3 pool\*) OR (water N3 immersion) ) OR AB ( (Water N3 birth) OR  
 3 waterbirth OR water-birth OR (birth\* N3 tub) OR (birth\* N3 pool\*) OR (water  
 4 N3 immersion) ) 6,075

5 S5 S3 AND S4 892

6 Embase (tested via HDAS, but this should work on Ovid. You may need an extra .  
 7 after the .ti,ab. As I've seen this in online guides, but it doesn't work on HDAS.  
 8 I'm hoping these are Emtree headings, but again, I've only been able to test of  
 9 the HDAS version of Embase and not unadulterated Ovid)

10 S1 (Intrapartum OR intra-partum OR labor OR laboring OR labour OR labouring  
 11 OR deliver\* OR childbirth\* OR birth\* OR parturition).ti,ab 1,280,617

12 S2 exp CHILDBIRTH/ or exp LABOR/ 55,737

13 S3 S1 OR S2 1,290,620

14 S4 ((Water ADJ3 birth) OR waterbirth OR water-birth OR (birth\* ADJ3 tub) OR  
 15 (birth\* ADJ3 pool\*) OR (water ADJ3 immersion)).ti,ab 6,384

16 S5 "WATER BIRTH"/ 175

17 S6 S4 OR S5 6,421

18 S7 S3 AND S6 874

## 22 CENTRAL

23 (note for Claire – when running the searches, you need to be in Search  
 24 Manager, and you have to actually search for the Mesh headings using the  
 25 Mesh option next to the search box, you can't just copy and paste the line in)

26 S1 (Intrapartum OR intra-partum OR labor OR laboring OR labour OR labouring  
 27 OR deliver\* OR childbirth\* OR birth\* OR parturition):ti OR (Intrapartum OR  
 28 intra-partum OR labor OR laboring OR labour OR labouring OR deliver\* OR  
 29 childbirth\* OR birth\* OR parturition):ab 98,911

30 S2 MeSH descriptor: [Labor, Obstetric] explode all trees 2,298

31 S3 MeSH descriptor: [Parturition] explode all trees 408

32 S4 S1 OR S2 OR S3 99,254

33 S5 ((water NEAR birth\*) OR (water NEAR immersion) OR waterbirth\* OR water-  
 34 birth\* OR (birth\* NEAR tub) OR (birth\* NEAR pool\*)):ti OR ((water NEAR birth\*)  
 35 OR (water NEAR immersion) OR waterbirth\* OR water-birth\* OR (birth\* NEAR  
 36 tub) OR (birth\* NEAR pool\*)):ab 792

37 S6 S4 AND S5 117

## CINAHL

| Accessibility Information and Tips Revised Date: 07/2015 |                                                                                                                                                                                                                                                      |                                                                                                                                                                                                                                                      |                                          |         |
|----------------------------------------------------------|------------------------------------------------------------------------------------------------------------------------------------------------------------------------------------------------------------------------------------------------------|------------------------------------------------------------------------------------------------------------------------------------------------------------------------------------------------------------------------------------------------------|------------------------------------------|---------|
| Print Search History                                     |                                                                                                                                                                                                                                                      |                                                                                                                                                                                                                                                      |                                          |         |
| Monday, March 09, 2020 9:20:23 AM                        |                                                                                                                                                                                                                                                      | Monday, March 09, 2020 9:20:23 AM                                                                                                                                                                                                                    |                                          |         |
| #                                                        | Query                                                                                                                                                                                                                                                | Query                                                                                                                                                                                                                                                | Last Run Via                             | Results |
| S8                                                       | ((MH water birth) OR (S4 OR S5)) AND (S3 AND S6)                                                                                                                                                                                                     | ((MH water birth) OR (S4 OR S5)) AND (S3 AND S6)                                                                                                                                                                                                     | Interface - EBSCOhost Research Databases | 719     |
|                                                          |                                                                                                                                                                                                                                                      |                                                                                                                                                                                                                                                      | Search Screen - Advanced Search          |         |
|                                                          |                                                                                                                                                                                                                                                      |                                                                                                                                                                                                                                                      | Database - CINAHL                        |         |
| S7                                                       | ((MH water birth) OR (S4 OR S5)) AND (S3 AND S6)                                                                                                                                                                                                     | ((MH water birth) OR (S4 OR S5)) AND (S3 AND S6)                                                                                                                                                                                                     | Interface - EBSCOhost Research Databases | 826     |
|                                                          |                                                                                                                                                                                                                                                      |                                                                                                                                                                                                                                                      | Search Screen - Advanced Search          |         |
|                                                          |                                                                                                                                                                                                                                                      |                                                                                                                                                                                                                                                      | Database - CINAHL                        |         |
| S6                                                       | (MH water birth) OR (S4 OR S5)                                                                                                                                                                                                                       | (MH water birth) OR (S4 OR S5)                                                                                                                                                                                                                       | Interface - EBSCOhost Research Databases | 1,577   |
|                                                          |                                                                                                                                                                                                                                                      |                                                                                                                                                                                                                                                      | Search Screen - Advanced Search          |         |
|                                                          |                                                                                                                                                                                                                                                      |                                                                                                                                                                                                                                                      | Database - CINAHL                        |         |
| S5                                                       | MH water birth                                                                                                                                                                                                                                       | MH water birth                                                                                                                                                                                                                                       | Interface - EBSCOhost Research Databases | 602     |
|                                                          |                                                                                                                                                                                                                                                      |                                                                                                                                                                                                                                                      | Search Screen - Advanced Search          |         |
|                                                          |                                                                                                                                                                                                                                                      |                                                                                                                                                                                                                                                      | Database - CINAHL                        |         |
| S4                                                       | TI water N3 birth OR TI ( waterbirth or water-birth ) OR TI birth* N3 tub OR TI birth* N3 pool* OR TI water N3 immersion OR AB water N3 birth OR AB ( waterbirth or water-birth ) OR AB birth* N3 tub OR AB birth* N3 pool* OR AB water N3 immersion | TI water N3 birth OR TI ( waterbirth or water-birth ) OR TI birth* N3 tub OR TI birth* N3 pool* OR TI water N3 immersion OR AB water N3 birth OR AB ( waterbirth or water-birth ) OR AB birth* N3 tub OR AB birth* N3 pool* OR AB water N3 immersion | Interface - EBSCOhost Research Databases | 1,270   |
|                                                          |                                                                                                                                                                                                                                                      |                                                                                                                                                                                                                                                      | Search Screen - Advanced Search          |         |
|                                                          |                                                                                                                                                                                                                                                      |                                                                                                                                                                                                                                                      | Database - CINAHL                        |         |

|   |    |                                                                                                                                                                                                                                                                                                   |                                                                                                                                                                                                                                                                                                   |                                                   |         |
|---|----|---------------------------------------------------------------------------------------------------------------------------------------------------------------------------------------------------------------------------------------------------------------------------------------------------|---------------------------------------------------------------------------------------------------------------------------------------------------------------------------------------------------------------------------------------------------------------------------------------------------|---------------------------------------------------|---------|
| 1 | S3 | ((MH childbirth+ OR MH labor+)<br>OR (S1 OR S2)) AND (S1 OR S2))<br>AND (S1 OR S2)                                                                                                                                                                                                                | ((MH childbirth+ OR MH labor+)<br>OR (S1 OR S2)) AND (S1 OR S2))<br>AND (S1 OR S2)                                                                                                                                                                                                                | Interface -<br>EBSCOhost<br>Research<br>Databases | 263,754 |
| 2 |    |                                                                                                                                                                                                                                                                                                   |                                                                                                                                                                                                                                                                                                   | Search Screen - Advanced<br>Search                |         |
| 3 |    |                                                                                                                                                                                                                                                                                                   |                                                                                                                                                                                                                                                                                                   | Database - CINAHL                                 |         |
| 4 |    |                                                                                                                                                                                                                                                                                                   |                                                                                                                                                                                                                                                                                                   |                                                   |         |
| 5 | S2 | MH childbirth+ OR MH labor+                                                                                                                                                                                                                                                                       | MH childbirth+ OR MH labor+                                                                                                                                                                                                                                                                       | Interface -<br>EBSCOhost<br>Research<br>Databases | 36,225  |
| 6 |    |                                                                                                                                                                                                                                                                                                   |                                                                                                                                                                                                                                                                                                   | Search Screen - Advanced<br>Search                |         |
| 7 |    |                                                                                                                                                                                                                                                                                                   |                                                                                                                                                                                                                                                                                                   | Database - CINAHL                                 |         |
| 8 |    |                                                                                                                                                                                                                                                                                                   |                                                                                                                                                                                                                                                                                                   |                                                   |         |
| 9 | S1 | TI ( intrapartum or intra-partum or<br>labor or laboring or labour or<br>labouring or deliver* or<br>childbirth* or birth* or parturition<br>) OR AB ( intrapartum or intra-<br>partum or labor or laboring or<br>labour or labouring or deliver* or<br>childbirth* or birth* or parturition<br>) | TI ( intrapartum or intra-partum or<br>labor or laboring or labour or<br>labouring or deliver* or<br>childbirth* or birth* or parturition<br>) OR AB ( intrapartum or intra-<br>partum or labor or laboring or<br>labour or labouring or deliver* or<br>childbirth* or birth* or parturition<br>) | Interface -<br>EBSCOhost<br>Research<br>Databases | 253,388 |

## PSYCHINFO

| Accessibility Information and Tips Revised Date: 07/2015 |                                                                                                                                                                                                                                                                           |                                       |                                          |         |
|----------------------------------------------------------|---------------------------------------------------------------------------------------------------------------------------------------------------------------------------------------------------------------------------------------------------------------------------|---------------------------------------|------------------------------------------|---------|
| Print Search History                                     |                                                                                                                                                                                                                                                                           |                                       |                                          |         |
| Monday, March 09, 2020 9:59:32 AM                        |                                                                                                                                                                                                                                                                           |                                       |                                          |         |
| #                                                        | Query                                                                                                                                                                                                                                                                     | Limiters/Expanders                    | Last Run Via                             | Results |
| S5                                                       | (TI water N3 birth OR TI ( waterbirth or water-birth ) OR TI birth* N3 tub OR TI birth* N3 pool OR TI water N3 immersion OR AB water N3 birth OR AB ( waterbirth or water-birth ) OR AB birth* N3 tub OR AB birth* N3 pool OR AB water N3 immersion) AND (S3 AND S4)      | Expanders - Apply equivalent subjects | Interface - EBSCOhost Research Databases | 58      |
|                                                          |                                                                                                                                                                                                                                                                           | Search modes - Boolean/Phrase         | Search Screen - Advanced Search          |         |
|                                                          |                                                                                                                                                                                                                                                                           |                                       | Database - APA PsycInfo                  |         |
| S4                                                       | TI water N3 birth OR TI ( waterbirth or water-birth ) OR TI birth* N3 tub OR TI birth* N3 pool OR TI water N3 immersion OR AB water N3 birth OR AB ( waterbirth or water-birth ) OR AB birth* N3 tub OR AB birth* N3 pool OR AB water N3 immersion                        | Expanders - Apply equivalent subjects | Interface - EBSCOhost Research Databases | 451     |
|                                                          |                                                                                                                                                                                                                                                                           | Search modes - Boolean/Phrase         | Search Screen - Advanced Search          |         |
|                                                          |                                                                                                                                                                                                                                                                           |                                       | Database - APA PsycInfo                  |         |
| S3                                                       | ((((MM "Intrapartum Period") OR (MM "Birth" OR MM "Birth Weight" OR MM "Caesarean Birth" OR MM "Labor (Childbirth)" OR MM "Natural Childbirth" OR MM "Premature Birth"))) OR (MM "Labor (Childbirth)" OR MM "Caesarean Birth" OR MM "Intrapartum Period"))) OR (S1 OR S2) | Expanders - Apply equivalent subjects | Interface - EBSCOhost Research Databases | 190,277 |
|                                                          |                                                                                                                                                                                                                                                                           | Search modes - Boolean/Phrase         | Search Screen - Advanced Search          |         |
|                                                          |                                                                                                                                                                                                                                                                           |                                       | Database - APA PsycInfo                  |         |
| S2                                                       | ((((MM "Intrapartum Period") OR (MM "Birth" OR MM "Birth Weight" OR MM "Caesarean Birth" OR MM "Labor (Childbirth)" OR MM "Natural Childbirth" OR MM "Premature Birth"))) OR (MM "Labor (Childbirth)" OR MM "Caesarean Birth" OR MM "Intrapartum Period"))                | Expanders - Apply equivalent subjects | Interface - EBSCOhost Research Databases | 12,875  |

|    |                                                                                                                                                                                                                                                                        |                                       |                                          |         |
|----|------------------------------------------------------------------------------------------------------------------------------------------------------------------------------------------------------------------------------------------------------------------------|---------------------------------------|------------------------------------------|---------|
|    |                                                                                                                                                                                                                                                                        | Search modes - Boolean/Phrase         | Search Screen - Advanced Search          |         |
|    |                                                                                                                                                                                                                                                                        |                                       | Database - APA PsycInfo                  |         |
| S1 | TI ( intrapartum or intrapartum or labor or laboring or labour or labouring or deliver* or childbirth* or birth* or parturition ) OR AB ( intrapartum or intrapartum or labor or laboring or labour or labouring or deliver* or childbirth* or birth* or parturition ) | Expanders - Apply equivalent subjects | Interface - EBSCOhost Research Databases | 187,669 |
|    |                                                                                                                                                                                                                                                                        | Search modes - Boolean/Phrase         | Search Screen - Advanced Search          |         |
|    |                                                                                                                                                                                                                                                                        |                                       | Database - APA PsycInfo                  |         |

**MEDLINE**

| <a href="#">Accessibility Information and Tips Revised Date: 07/2015</a> |                                                                                                                                                                                                                                                                  |                                       |                                          |         |
|--------------------------------------------------------------------------|------------------------------------------------------------------------------------------------------------------------------------------------------------------------------------------------------------------------------------------------------------------|---------------------------------------|------------------------------------------|---------|
| <b>Print Search History</b>                                              |                                                                                                                                                                                                                                                                  |                                       |                                          |         |
| Monday, March 09, 2020 11:32:22 AM                                       |                                                                                                                                                                                                                                                                  |                                       |                                          |         |
| #                                                                        | Query                                                                                                                                                                                                                                                            | Limiters/Expanders                    | Last Run Via                             | Results |
| S5                                                                       | (TI Water N3 birth OR TI ( waterbirth or water-birth ) OR TI birth N3 tub OR TI birth N3 pool OR TI water N3 immersion OR AB Water N3 birth OR AB ( waterbirth or water-birth ) OR AB birth N3 tub OR AB birth N3 pool OR AB water N3 immersion) AND (S3 AND S4) | Expanders - Apply equivalent subjects | Interface - EBSCOhost Research Databases | 697     |
|                                                                          |                                                                                                                                                                                                                                                                  | Search modes - Boolean/Phrase         | Search Screen - Advanced Search          |         |
|                                                                          |                                                                                                                                                                                                                                                                  |                                       | Database - MEDLINE with Full Text        |         |
| S4                                                                       | TI Water N3 birth OR TI ( waterbirth or water-birth ) OR TI birth N3 tub OR TI birth N3 pool OR TI water N3 immersion OR AB Water N3 birth OR AB ( waterbirth or water-birth ) OR AB birth N3 tub OR AB birth N3 pool OR AB water N3 immersion                   | Expanders - Apply equivalent subjects | Interface - EBSCOhost Research Databases | 5,881   |
|                                                                          |                                                                                                                                                                                                                                                                  | Search modes - Boolean/Phrase         | Search Screen - Advanced Search          |         |
|                                                                          |                                                                                                                                                                                                                                                                  |                                       | Database - MEDLINE with Full Text        |         |
| S3                                                                       | (MH Parturition+ OR MH Labor, Obstetric+) OR (S1 OR S2)                                                                                                                                                                                                          | Expanders - Apply equivalent subjects | Interface - EBSCOhost Research Databases | 988,860 |
|                                                                          |                                                                                                                                                                                                                                                                  | Search modes - Boolean/Phrase         | Search Screen - Advanced Search          |         |

|    |                                                                                                                                                                                                                                                                          |                                       |                                          |         |
|----|--------------------------------------------------------------------------------------------------------------------------------------------------------------------------------------------------------------------------------------------------------------------------|---------------------------------------|------------------------------------------|---------|
|    |                                                                                                                                                                                                                                                                          |                                       | Database - MEDLINE with Full Text        |         |
| S2 | MH Parturition+ OR MH Labor, Obstetric+                                                                                                                                                                                                                                  | Expanders - Apply equivalent subjects | Interface - EBSCOhost Research Databases | 60,125  |
|    |                                                                                                                                                                                                                                                                          | Search modes - Boolean/Phrase         | Search Screen - Advanced Search          |         |
|    |                                                                                                                                                                                                                                                                          |                                       | Database - MEDLINE with Full Text        |         |
| S1 | TI ( intrapartum or intra-partum or labor or laboring or labour or labouring or deliver* or childbirth* or birth* or parturition ) OR AB ( intrapartum or intra-partum or labor or laboring or labour or labouring or deliver* or childbirth* or birth* or parturition ) | Expanders - Apply equivalent subjects | Interface - EBSCOhost Research Databases | 970,439 |
|    |                                                                                                                                                                                                                                                                          | Search modes - Boolean/Phrase         | Search Screen - Advanced Search          |         |
|    |                                                                                                                                                                                                                                                                          |                                       | Database - MEDLINE with Full Text        |         |

## EMBASE

| Search History                                    |                                                                                                                                                                                          |         |          |                      |                                 |  |
|---------------------------------------------------|------------------------------------------------------------------------------------------------------------------------------------------------------------------------------------------|---------|----------|----------------------|---------------------------------|--|
| (7searches found)                                 |                                                                                                                                                                                          |         |          |                      |                                 |  |
| Search history sorted by search number descending |                                                                                                                                                                                          |         |          |                      |                                 |  |
| #                                                 | Searches                                                                                                                                                                                 | Results | Type     | Actions              | Annotations                     |  |
| 7                                                 | 3 and 6                                                                                                                                                                                  | 552     | Advanced | <a href="#">More</a> | <a href="#">Display Results</a> |  |
| 6                                                 | 4 or 5                                                                                                                                                                                   | 55859   | Advanced | <a href="#">More</a> | <a href="#">Display Results</a> |  |
| 5                                                 | exp labor/                                                                                                                                                                               | 34388   | Advanced | <a href="#">More</a> | <a href="#">Display Results</a> |  |
| 4                                                 | exp childbirth/                                                                                                                                                                          | 55859   | Advanced | <a href="#">More</a> | <a href="#">Display Results</a> |  |
| 3                                                 | 1 and 2                                                                                                                                                                                  | 39342   | Advanced | <a href="#">More</a> | <a href="#">Display Results</a> |  |
| 2                                                 | (water or waterbirth or water birth or water immersion or hydrotherapy or birth* pool).ti. or (water or waterbirth or water birth or water immersion or hydrotherapy or birth* pool).ab. | 883990  | Advanced | <a href="#">More</a> | <a href="#">Display Results</a> |  |
|                                                   |                                                                                                                                                                                          |         |          | <a href="#">More</a> |                                 |  |

|  |   |                                                                                                                                                                                                                                                                        |         |          |                                 |
|--|---|------------------------------------------------------------------------------------------------------------------------------------------------------------------------------------------------------------------------------------------------------------------------|---------|----------|---------------------------------|
|  | 1 | (intrapartum or intra-partum or labor or laboring or labour or labouring or deliver* or childbirth* or birth* or parturition).ti. or (intrapartum or intra-partum or labor or laboring or labour or labouring or deliver* or childbirth* or birth* or parturition).ab. | 1283598 | Advanced | <a href="#">Display Results</a> |
|  |   |                                                                                                                                                                                                                                                                        |         |          | <a href="#">More</a>            |

COCHRANE

|              |                                                                                                                                                                       |        |
|--------------|-----------------------------------------------------------------------------------------------------------------------------------------------------------------------|--------|
| Search Name: | water                                                                                                                                                                 |        |
| Date Run:    | #####                                                                                                                                                                 |        |
| Comment:     |                                                                                                                                                                       |        |
| ID           | Search                                                                                                                                                                | Hits   |
| #1           | intrapartum or intra-partum or labor or laboring or labour or labouring or deliver* or childbirth* or birth* or parturition                                           | 109154 |
| #2           | MeSH descriptor: [Labor, Obstetric] explode all trees                                                                                                                 | 2298   |
| #3           | MeSH descriptor: [Parturition] explode all trees                                                                                                                      | 408    |
| #4           | #1 or #2 or #3                                                                                                                                                        | 109322 |
| #5           | (water NEAR birth):ti,ab,kw OR (water NEAR immersion):ti,ab,kw OR (waterbirth* or water-birth*):ti,ab,kw OR (birth* NEAR tub):ti,ab,kw OR (birth* NEAR pool):ti,ab,kw | 788    |
| #6           | #4 AND #5                                                                                                                                                             | 87     |

| Database                  | Number of hits |  |
|---------------------------|----------------|--|
| CINAHL                    | 719            |  |
| pyshinfo                  | 58             |  |
| MEDLINE                   | 697            |  |
| EMBASE                    | 552            |  |
| COCHRANE                  | 87             |  |
|                           | <b>2113</b>    |  |
| Duplicates removed        | 446            |  |
|                           | 1667           |  |
| Screened title/abstract   | 1667           |  |
| Excluded                  | 1561           |  |
| Included for full text    | <b>106</b>     |  |
|                           |                |  |
| Full text EXCLUDED        | 49             |  |
| <b>Full text INCLUDED</b> | <b>57</b>      |  |
| BMC update                | 1              |  |



|  |    |          |
|--|----|----------|
|  | 58 | INCLUDED |
|--|----|----------|

| Reasons for exclusions        | Number |
|-------------------------------|--------|
| Unable to obtain text         | 11     |
| Wrong study outcomes          | 7      |
| Wrong study design            | 6      |
| Conference abstract           | 5      |
| Discussion paper not research | 2      |
| Reprinted publication         | 1      |
| Unable to translate text      | 9      |
| Duplicate                     | 4      |
| Letter not research           | 2      |
| Wrong publication type        | 1      |
| Poster                        | 1      |
|                               | 49     |

For peer review only

Supplement 2: Directed Acyclic Graphs to identify assumptions of covariates likely to cause heterogeneity in the outcomes.

DAG 1: Assumptions about variables associated with variation in mode of birth.

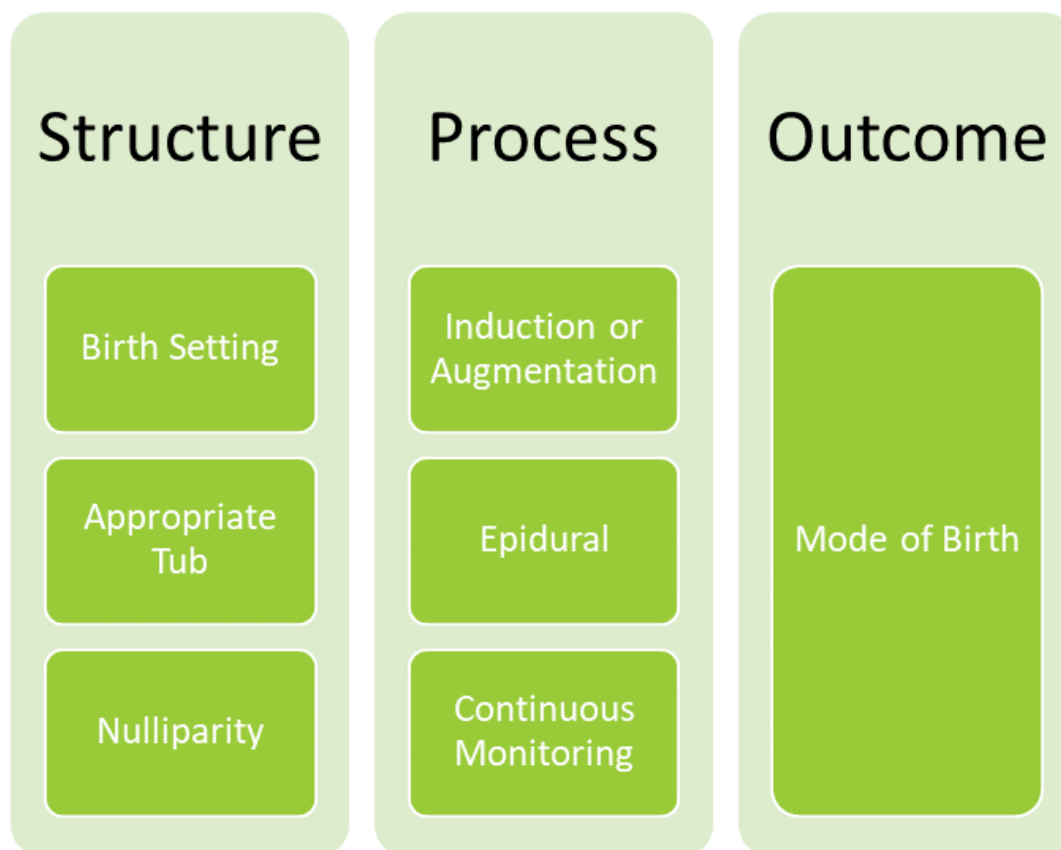

1  
2  
3  
4  
5  
6  
7  
8  
9  
10  
11  
12  
13  
14  
15  
16  
17  
18  
19  
20  
21  
22  
23  
24  
25  
26  
27  
28  
29  
30  
31  
32  
33  
34  
35  
36  
37  
38  
39  
40  
41  
42  
43  
44  
45  
46  
47  
48  
49  
50  
51  
52  
53  
54  
55  
56  
57  
58  
59  
60

DAG 2: Assumptions about variables associated with variation in maternal satisfaction

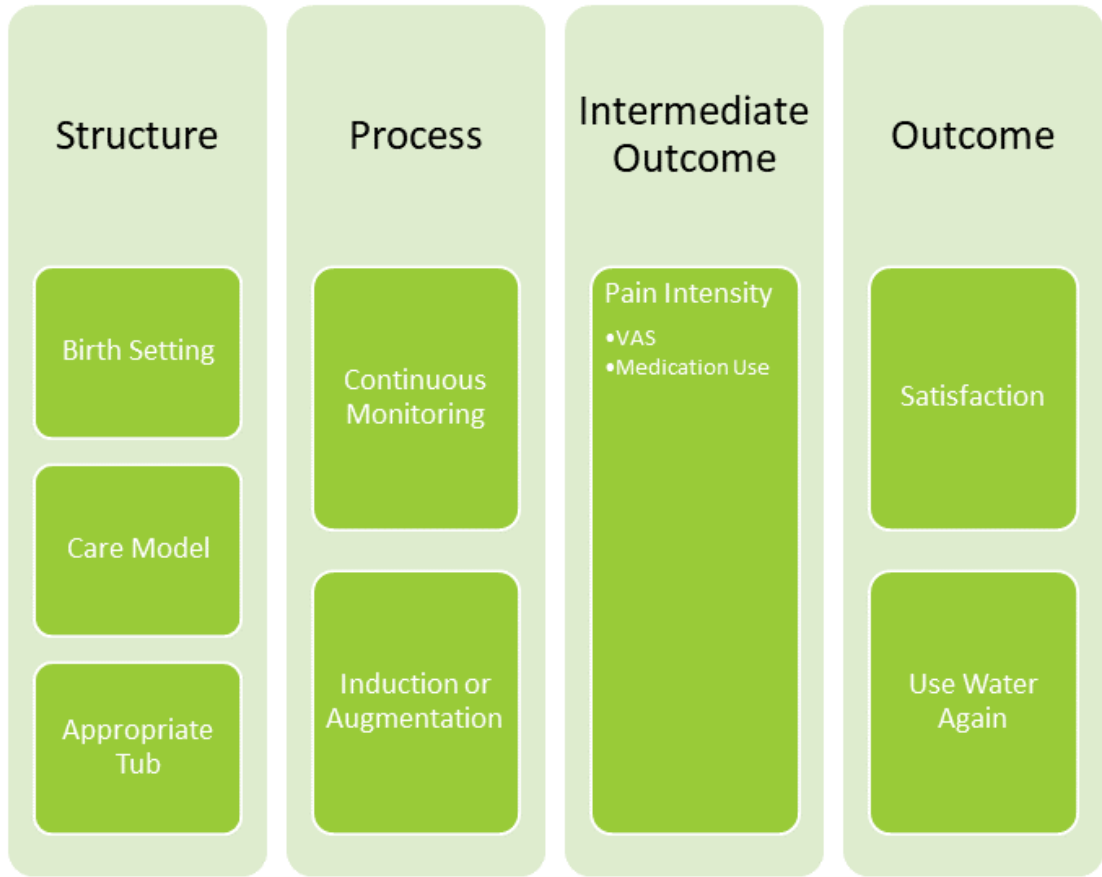

only

DAG 3: Assumptions about variables associated with variation in perineal outcomes.

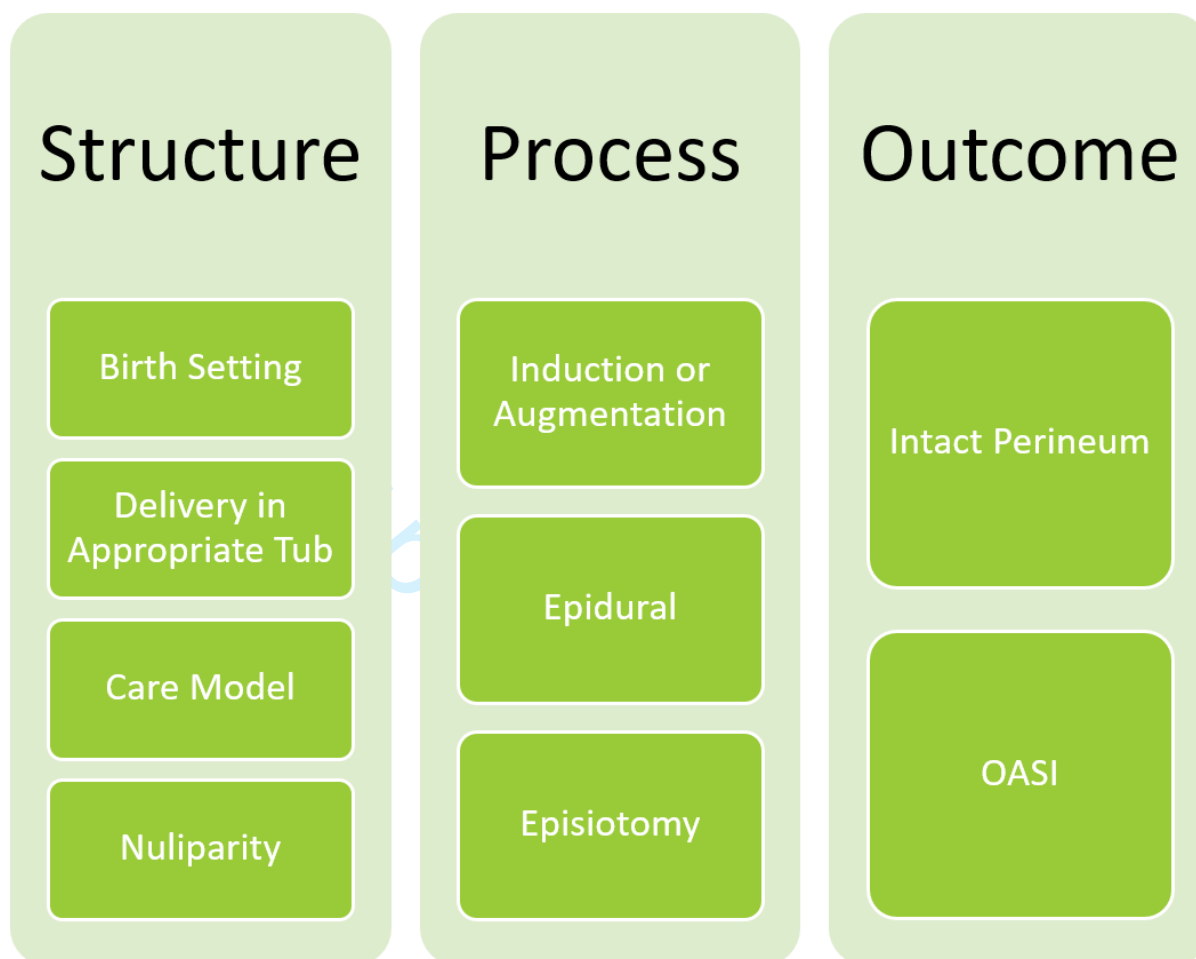

1  
2  
3  
4  
5  
6  
7  
8  
9  
10  
11  
12  
13  
14  
15  
16  
17  
18  
19  
20  
21  
22  
23  
24  
25  
26  
27  
28  
29  
30  
31  
32  
33  
34  
35  
36  
37  
38  
39  
40  
41  
42  
43  
44  
45  
46  
47  
48  
49  
50  
51  
52  
53  
54  
55  
56  
57  
58  
59  
60

DAG 4: Assumptions about variables associated with variation in maternal infection.

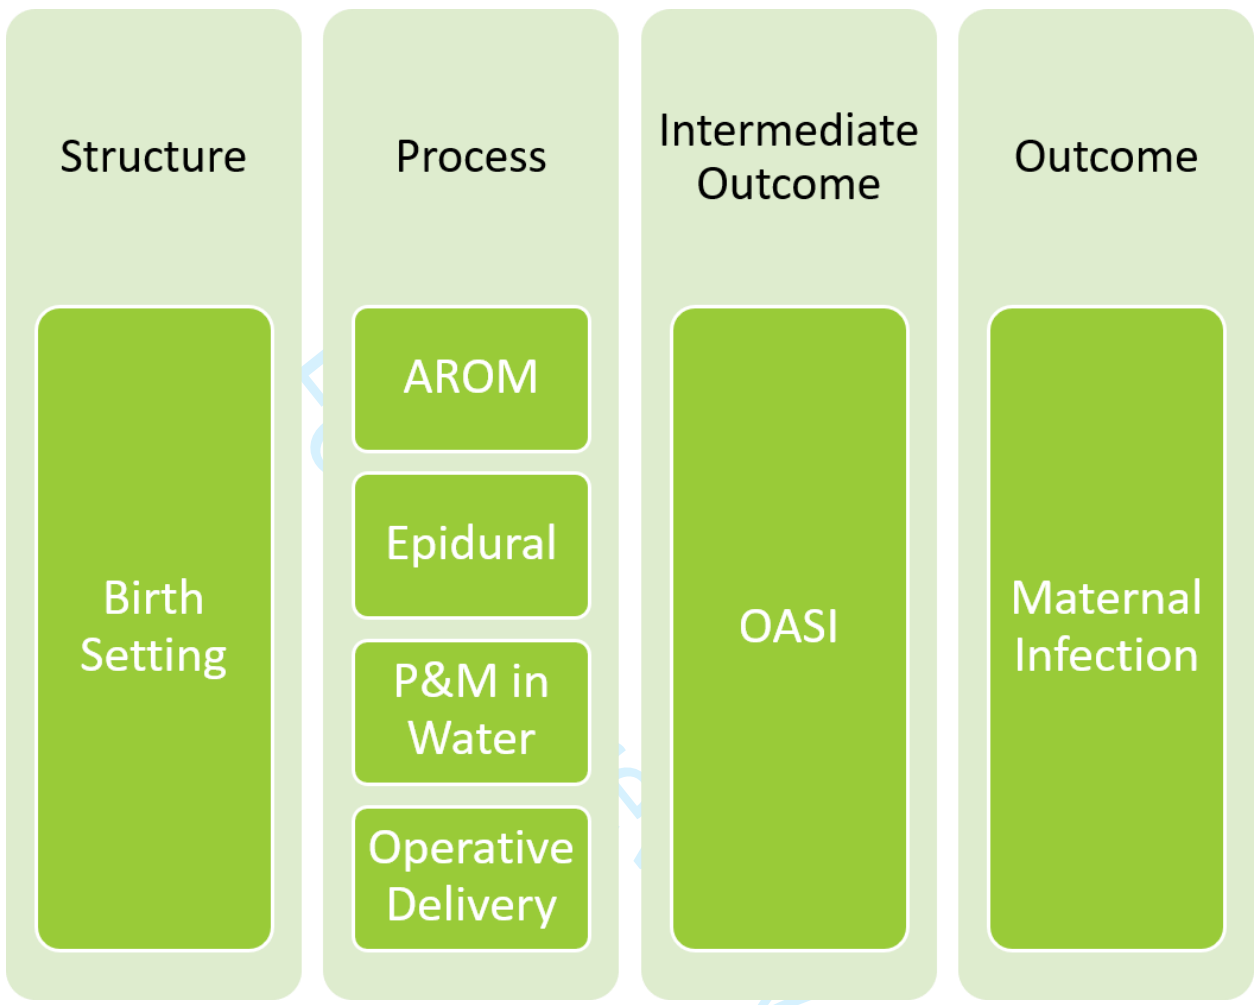

DAG 5: Assumptions about variables associated with variation in neonatal outcomes.

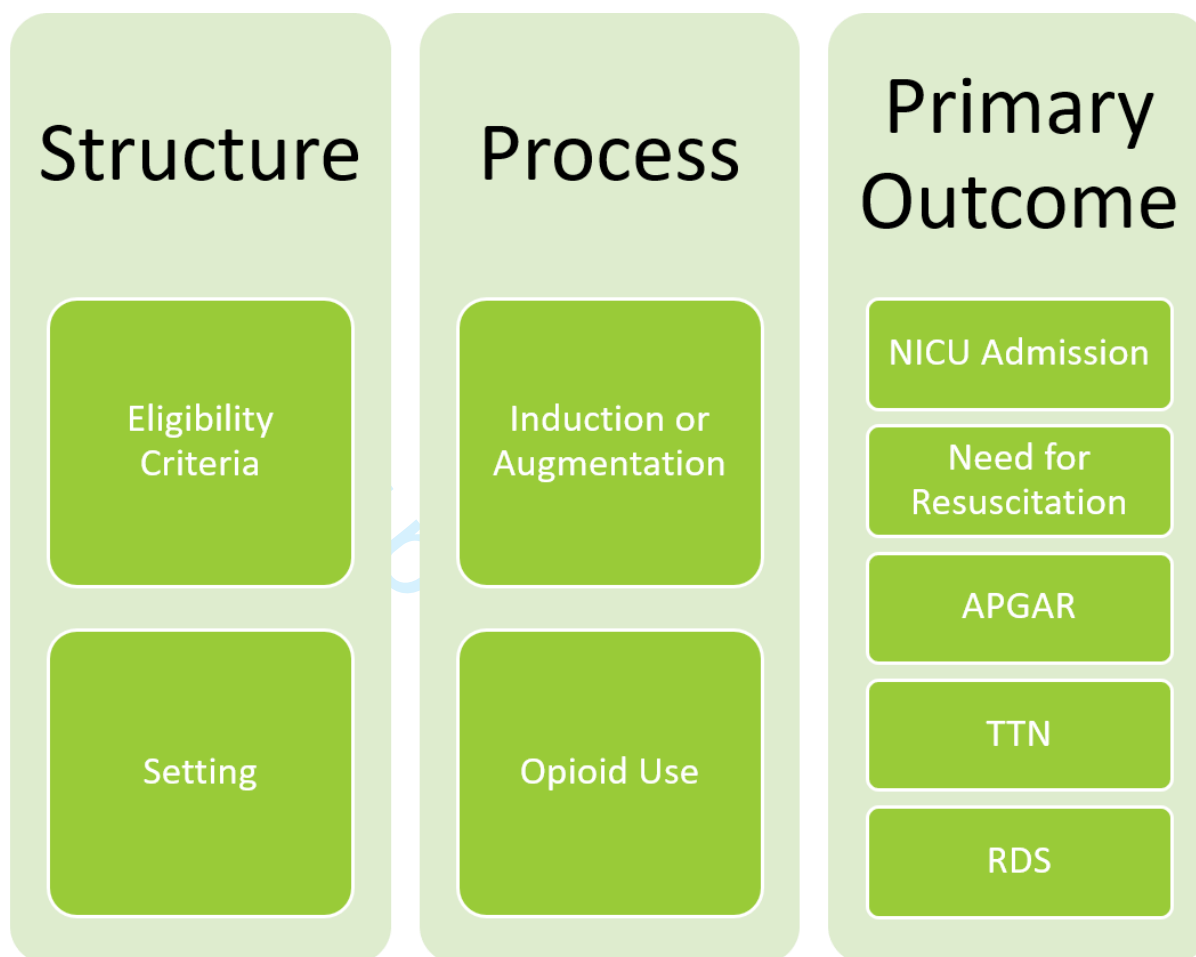

**Supplement 3: Total studies excluded following searches and during full text review; systematic review and meta-analysis of interventions and outcomes with water birth.**

- Bodner, K., Bodner-Adler, B., Wierrani, F., Mayerhofer, K., Fousek, C., Niedermayr, A., & Grünberger, W. (2002). Effects of water birth on maternal and neonatal outcomes. *Wiener Klinische Wochenschrift*, *114*(10), 391–395. [UNABLE TO OBTAIN TEXT]
- Burns EE, Boulton MG, Cluett E, Cornelius V, Smith LA (2012) Characteristics, Interventions, and Outcomes of Women Who Used a Birthing Pool: A Prospective Observational Study *Birth*, *39*, (3), 192-202 <https://doi.org/10.1111/j.1523-536X.2012.00548.x> [WRONG STUDY DESIGN]
- Burns, E., Price, L., Carpenter, J., & Smith, L. (2020). Predictors of obstetric anal sphincter injury during waterbirth: a secondary analysis of a prospective observational study. *International urogynecology journal*, *31*(3), 651–656. <https://doi.org/10.1007/s00192-019-04167-6> [WRONG STUDY DESIGN]
- Camargo, J., Varela, V., Ferreira, F. M., Pougy, L., Ochiai, A. M., Santos, M. E., & Grande, M. (2018). The Waterbirth Project: São Bernardo Hospital experience. *Women and birth : journal of the Australian College of Midwives*, *31*(5), e325–e333. <https://doi.org/10.1016/j.wombi.2017.12.008> [WRONG STUDY DESIGN]
- Carlson N.S., Corwin E.J., & Lowe N.K. (2017). Labor Intervention and Outcomes in Women Who Are Nulliparous and Obese: Comparison of Nurse-Midwife to Obstetrician Intrapartum Care. *J. Midwifery Women's Health*, *62*(1), 29–39. [WRONG STUDY OUTCOMES]
- Carpenter, L., & Weston, P. (2012). Neonatal respiratory consequences from water birth. *Journal of paediatrics and child health*, *48*(5), 419–423. <https://doi.org/10.1111/j.1440-1754.2011.02241.x> [WRONG STUDY DESIGN]
- Cluett ER, Pickering RM, & Brooking JI. (2001). An investigation into the feasibility of comparing three management options (augmentation, conservative and water) for nulliparae with dystocia in the first stage of labour. *Midwifery*, *17*(1), 35–43. [WRONG STUDY DESIGN]
- Combellick, J. L., Shin, H., Shin, D., Cai, Y., Hagan, H., Lacher, C., Lin, D. L., McCauley, K., Lynch, S. V., & Dominguez-Bello, M. G. (2018). Differences in the fecal microbiota of neonates born at home or in the hospital. *Scientific Reports*, *8*(1), 15660–15660. [WRONG OUTCOME]
- Cortes, E., Basra, R., & Kelleher, C. J. (2011). Waterbirth and pelvic floor injury: a retrospective study and postal survey using ICIQ modular long form questionnaires. *European journal of obstetrics, gynecology, and reproductive biology*, *155*(1), 27–30. <https://doi.org/10.1016/j.ejogrb.2010.11.012> [WRONG STUDY DESIGN]
- Czech, I., Fuchs, P., Fuchs, A., Lorek, M., Tobolska-Lorek, D., Drosdzol-Cop, A., & Sikora, J. (2018). Pharmacological and Non-Pharmacological Methods of Labour Pain Relief-Establishment of Effectiveness and Comparison. *International journal of environmental research and public health*, *15*(12), 2792. <https://doi.org/10.3390/ijerph15122792> [WRONG STUDY DESIGN]
- Dahlen, H. G., Dowling, H., Tracy, M., Schmied, V., & Tracy, S. (2013). Maternal and perinatal outcomes amongst low risk women giving birth in water compared to six birth positions on land. A descriptive cross sectional study in a birth centre over 12 years. *Midwifery*, *29*(7), 759–764. <https://doi.org/10.1016/j.midw.2012.07.002> [WRONG COMPARISON - waterbirth not a birth position]
- Damodaran S., Khatri P., Mahmood T.A., & Monaghan S.C. (2010). Waterbirths in Fife: A 6-year observational study. *J. Obstet. Gynaecol.*, *30*(7), 759. [CONFERENCE ABSTRACT]
- de Freitas Brilhante, A., a, Moreira Vasconcelos, C. T., de Castro Damasceno, A. K., Martins Pereira, A. M., da Silva Coelho, T., & Mendes de Freitas, C. (2017). OBSTETRICAL NURSES EVALUATION OF WATER BIRTHS. *Journal of Nursing UFPE / Revista de Enfermagem UFPE*, *11*(11), 4418–4423. [WRONG STUDY DESIGN]
- Demirel, G., Moraloglu, O., Celik, I. H., Erdeve, O., Mollamahmutoglu, L., Oguz, S. S., Uras, N., & Dilmen, U. (2013). The effects of water birth on neonatal outcomes: a five-year result of a referral tertiary centre. *European review for medical and pharmacological sciences*, *17*(10), 1395–1398. [WRONG STUDY DESIGN]
- Eberhard, J., & Geissbühler, V. (2000). Influence of alternative birth methods on traditional birth management. *Fetal Diagnosis And Therapy*, *15*(5), 283–290. [WRONG STUDY DESIGN]
- Eberhard J., Geissbuhler V., Chiffelle Ch., & Stein S. (2001). Alternative delivery methods and changes in obstetric practice. *Geburtshilfe Frauenheilkd.*, *61*(10), 771–777. [UNABLE TO OBTAIN]
- Eckert K., Turnbull D., & MacLennan A. (2001). Warm water bathing did not reduce use of pharmacological analgesia during the first stage of labour. *Evid.-Based Med.*, *6*(6), 177. [CONFERENCE ABSTRACT]
- Fehervary, P., Lauinger-Lörsch, E., Hof, H., Melchert, F., Bauer, L., & Zieger, W. (2004). Water birth: Microbiological colonisation of the newborn, neonatal and maternal infection rate in comparison to conventional bed deliveries. *Archives Of Gynecology And Obstetrics*, *270*(1), 6–9. [WRONG OUTCOMES]

- Geissbühler, V., & Eberhard, J. (2000). Waterbirths: A comparative study. A prospective study on more than 2,000 waterbirths. *Fetal Diagnosis And Therapy*, 15(5), 291–300. [DUPLICATE]
- Geissbühler, V., & Eberhard, J. (2002). [Alternative obstetrics: Bed, chair or tub? Have alternative birthing methods become established?]. *Therapeutische Umschau. Revue Therapeutique*, 59(12), 689–695. [DISCUSSION NOT PRIMARY RESEARCH]
- Geissbühler, Verena, & Eberhard, J. (2003). Experience with water births: A prospective longitudinal study of 9 years with almost 4,000 water births]. *Gynakologisch-Geburtshilfliche Rundschau*, 43(1), 12–18. [REPRINTED PUBLICATION]
- Geissbuehler V. (2004). Alternative delivery positions: Bed, chair or water birth. *Geburtshilfe Frauenheilkd.*, 64(8), 856–857. [DISCUSSION NOT PRIMARY RESEARCH]
- Geissbuehler, V., Stein, S., & Eberhard, J. (2004). Waterbirths compared with landbirths: an observational study of nine years. *Journal of perinatal medicine*, 32(4), 308–314. <https://doi.org/10.1515/JPM.2004.057> [DUPLICATE]
- Gephart L.F., McDonald V., & Daucher J.A. (2013). A preliminary exploration of the affect of water birth on infantand maternal morbidity in the United States. *Female Pelvic Med. Reconstr. Surg.*, 19, S124. [CONFERENCE ABSTRACT]
- Ghasemi, M., Tara, F., & Ashraf, H. (2013). Maternal-fetal and neonatal complications of water-birth compared with conventional delivery. *Iranian Journal of Obstetrics, Gynecology and Infertility*, 16(70), 9–15. [UNABLE TO TRANSLATE TEXT]
- Ghasemi M., & Valiani M. (2014). Water Birth; method, benefits and indications in comparison with normal vaginal delivery in women parturient in Isfahan University of Medical Sciences' hospitals. *Iran. J. Reprod. Med.*, 12(6), 48–49. [DUPLICATE/UNABLE TO TRANSLATE]
- Grodzka, M., Makowska, P., Wielgoś, M., Przyboś, A., Chrostowska, J., & Marianowski, L. (2001). [Water birth in the parturients' estimation]. *Ginekologia Polska*, 72(12), 1025–1030. [UNABLE TO OBTAIN TEXT]
- Hesson A., Bailey J.M., Carver A.R., & Langen E.S. (2019). 673: Supporting Vaginal Birth: Effects of labor support measures on cesarean delivery rates. *Am. J. Obstet. Gynecol.*, 220(1), S445. [CONFERENCE ABSTRACT]
- Heydari S.T., Sarikhani Y., Asadi N., Kazemi M., Sadati A.K., Zarei S., Mansuri Z., Keshvarz F., Jabbari R., Mohtashami A., & Lankarani K.B. (2019). Selection of delivery method and its related factors in pregnant women of shiraz in 2016. *Shiraz E Med. J.*, 20(5), e81676. [WRONG STUDY DESIGN]
- Homer C, Eckert K, Turnbull D, & MacLennan A. (2002). Immersion in water during first stage of labor...Eckert K, Turnbull D, MacLennan A. Immersion in water in the first stage of labor: A randomized controlled trial. *BIRTH* 2001;28(2):84-93). *Birth: Issues in Perinatal Care*, 29(1), 76–77. [LETTER NOT RESEARCH]
- IRCT2015111725002N2. (2016). The impact of water birth on childbirth. <http://www.who.int/trialssearch/Trial2.aspx?TrialID=IRCT2015111725002N2>. <https://www.cochranelibrary.com/central/doi/10.1002/central/CN-01870447/full> [WRONG PUBLICATION TYPE]
- Kavosi, Z., Keshtkaran, A., Setoodehzadeh, F., Kasraeian, M., Khammarnia, M., & Eslahi, M. (2015). A Comparison of Mothers' Quality of Life after Normal Vaginal, Cesarean, and Water Birth Deliveries. *International Journal of Community Based Nursing & Midwifery*, 3(3), 198–204. [WRONG OUTCOMES]
- Kiani K., Shahpourian F., Sedighian H., & Hosseini F. (2009). Effect of water birth on labor pain during active phase of labor. *Int. J. Gynecol. Obstet.*, 107, S227. [CONFERENCE ABSTRACT]
- Kowalewska, M., Welfel, E., Kawczyński, P., & Pokrzywnicka, M. (2004). [Clinical condition of newborns from water birth at the Perinatology Clinic, Institute of Gynecology and Obstetrics of the Medical University in Łódź, in the years 1996–2001]. *Ginekologia Polska*, 75(4), 267–273. [UNABLE TO TRANSLATE TEXT]
- Lukasse, M., Rowe, R., Townend, J., Knight, M., & Hollowell, J. (2014). Immersion in water for pain relief and the risk of intrapartum transfer among low risk nulliparous women: secondary analysis of the Birthplace national prospective cohort study. *BMC pregnancy and childbirth*, 14, 60. <https://doi.org/10.1186/1471-2393-14-60> [WRONG STUDY DESIGN]
- Malarewicz, A., Wydrzynski, G., Szymkiewicz, J., & Adamczyk-Gruszka, O. (2005). [The influence of water immersion on the course of first stage of parturition in primiparous women]. *Medycyna Wieku Rozwojowego*, 9(4), 773–780. [UNABLE TO OBTAIN TEXT]
- Maude, R.M., Kim, M. (2020). Getting into the water: a prospective observational study of water immersion for labour and birth at a New Zealand District Health Board. *BMC Pregnancy Childbirth* 20, 312 <https://doi.org/10.1186/s12884-020-03007-6> [WRONG STUDY DESIGN]
- Milosevic S, Channon S, Hunter B, Nolan M, Hughes J, Barlow C, Milton R, Sanders J, (2019) Factors influencing the use of birth pools in the United Kingdom: Perspectives of women, midwives and medical staff, *Midwifery*, 79 102554 <https://reader.elsevier.com/reader/sd/pii/S0266613819302451?token=69C52CCB1FB267BEF11B83215A5D48E075E410436F27E4E3CD500CBB70ED1EE8F5F7Do427832E46EDC51A669E78A73C&originRegion=eu-west-1&originCreation=20210824135734> [WRONG OUTCOMES AND STUDY DESIGN]



- 1  
2 Moneta, J., Oknińska, A., Wielgoś, M., Przyboś, A., Chrostowska, J., & Marianowski, L. (2001). [The influence of water immersion on  
3 the course of labor]. *Ginekologia Polska*, 72(12), 1031–1036. [UNABLE TO TRANSLATE]
- 4 Montiel-Morales DP, Ferreira-Jaime F, Rendon-Macias ME (2016) Comparación del periodo de transición en recién nacidos obtenidos  
5 de parto en agua y parto en seco. Estudio de cohorts *Pediatría* 83 (5), 148–153 [WRONG OUTCOME]
- 6  
7 O'Sullivan M., Basude S., Bahl R., & Mohan A. (2017). Does giving birth in water increase rates of perineal trauma and OASI (Obstetric  
8 Anal Sphincter Injury)? *BJOG Int. J. Obstet. Gynaecol.*, 124, 69. [POSTER PRESENTATION]
- 9  
10 Overgaard, C., Fenger-Grøn, M., S, & all, J. (2012). Freestanding midwifery units versus obstetric units: Does the effect of place of birth  
11 differ with level of social disadvantage? *BMC Public Health*, 12, 478–478. [WRONG OUTCOMES]
- 12 Peacock P.J., Zengeya S.T., Cochrane L., & Sleath M. (2017). Neonatal outcomes following delivery in water: Evaluation of safety in a  
13 district general hospital. *Arch. Dis. Child.*, 102, A92. [DUPLICATE]
- 14  
15 Pellantová, S., Vebera, Z., & Půček, P. (2003). [Water delivery—a 5-year retrospective study]. *Ceska Gynecologie*, 68(3), 175–179.  
16 [UNABLE TO TRANSLATE]
- 17  
18 Righetti, P. L., Pernici, A., ra, Casadei, D., Panizzo, F., Romagnolo, C., & Maggino, T. (2009). La nascita: Uno sguardo al vissuto  
19 materno Una ricerca empirica sull'impatto di tre modalità di parto sull'emozionalità e le rappresentazioni materne = The birth: A look  
20 at the mothers' psychological view An empirical research on the impact of three methods of birth on emotionality and maternal  
21 representations. *Giornale Di Psicologia*, 3(1), 83–105. [WRONG STUDY DESIGN]
- 22  
23 Schröcksnadel, H., Kunczicky, V., Meier, J., Brezinka, C., & Oberaigner, W. (2003). Gebären im Wasser. Erfahrungen einer  
24 Universitätsklinik und eines Bezirkskrankenhauses in Österreich [Water Birth: experience at a university clinic and a district hospital  
25 in Austria]. *Gynakologisch-geburtshilfliche Rundschau*, 43(1), 7–11. <https://doi.org/10.1159/000067170> [ENGLISH TRANSLATION  
26 INSUFFICIENT]
- 27  
28 Sidebottom, A. C., Vacquier, M., Simon, K., Fontaine, P., Dahlgren-Roemmich, D., Hyer, B., Jackson, J., Steinbring, S., Wunderlich,  
29 W., & Saul, L. (2019). Who Gives Birth in the Water? A Retrospective Cohort Study of Intended versus Completed  
30 Waterbirths. *Journal of midwifery & women's health*, 64(4), 403–409. <https://doi.org/10.1111/jmwh.12961> [WRONG STUDY DESIGN]
- 31  
32 Sindik N. (2006). Water birth. *Gynaecol. Perinatol. Suppl.*, 15(1), 33–36. [UNABLE TO TRANSLATE]
- 33  
34 Sipiński, A., Poreba, R., Cnota, W., & Poreba, A. (2000). [The analysis of 135 water births]. *Ginekologia Polska*, 71(4), 208–212. [UNABLE  
35 TO TRANSLATE]
- 36  
37 Stark M.A., Rudell B., & Haus G. (2008). Observing position and movements in hydrotherapy: A pilot study. *JOGNN J. Obstet. Gynecol.  
38 Neonatal Nurs.*, 37(1), 116–122. [WRONG OUTCOMES]
- 39  
40 Suto, M., Takehara, K., Misago, C., & Matsui, M. (2015). Prevalence of Perineal Lacerations in Women Giving Birth at Midwife-Led  
41 Birth Centers in Japan: A Retrospective Descriptive Study. *Journal of midwifery & women's health*, 60(4), 419–427.  
42 <https://doi.org/10.1111/jmwh.12324> [WRONG STUDY DESIGN]
- 43  
44 Thoeni A., Oberhuber A., & Moroder L. (2003). Giving birth and being born in the water. Experience after 1325 waterbirths. *Ital. J.  
45 Gynaecol. Obstet.*, 15(3), 113–120. [UNABLE TO OBTAIN]
- 46  
47 Thoni A., & Azzolini M.E. (2003). A review of 1136 waterbirths. *G. Ital. Ostet. Ginecol.*, 25(7), 305–311. [UNABLE TO OBTAIN]
- 48  
49 Thoni A., & Krauss P. (2000). Waterbirth: A review of 500 deliveries and a comparison with other delivery positions. *Ital. J. Gynaecol.  
50 Obstet.*, 12(3), 83–87. [UNABLE TO OBTAIN]
- 51  
52 Thöni, A., & Murari, S. (2001). [Birth in water. A comparative study after 555 births in water]. *Minerva Ginecologica*, 53(1), 29–34.  
53 [UNABLE TO OBTAIN]
- 54  
55 Thoni A., & Mussner K. (2002). Water birth—A review of 969 deliveries and a comparison with other delivery positions. *Geburtshilfe  
56 Frauenheilkd.*, 62(10), 977–981. [UNABLE TO TRANSLATE]
- 57  
58 Thoni A., & Mussner K. (2002). Water birth—A review of 969 deliveries and a comparison with other delivery positions. *Geburtshilfe  
59 Frauenheilkd.*, 62(10), 977–981. [DUPLICATE]
- 60  
61 Thoni A (2004) Giving birth and being born in water *Midwifery Today* Summer 44–45 [EXTENDED ABSTRACT]
- 62  
63 Thöni, A., Zech, N., & Moroder, L. (2005). [Water birth and neonatal infections. Experience with 1575 deliveries in water]. *Minerva  
64 Ginecologica*, 57(2), 199–206. [UNABLE TO OBTAIN]
- 65  
66 Thoni A., Zech N., Moroder L., Mussner K., & Ploner F. (2005). The risk of infection in water births. *Gynakol. Prax.*, 29(2), 233–241.  
67 [UNABLE TO OBTAIN]

- 1 Thoni A., Murari S., & Zech N. (2006). Giving birth and being born in the water. Report following 1850 underwater births. *Ital. J. Gynaecol. Obstet.*, 18(1), 11–17. [UNABLE TO OBTAIN]
- 2
- 3 Thoni, A., Zech, N., Moroder, L., & Ploner, F. (2007). Die Kontamination des Wassers und die Infektionsrate bei der Wassergeburt [Water contamination and infection rate after water births]. *Gynakologisch-geburtshilfliche Rundschau*, 47(1), 33–38. <https://doi.org/10.1159/000098123> [WRONG STUDY DESIGN]
- 5
- 6 Thöni, A., Mussner, K., & Ploner, F. (2010). [Water birthing: Retrospective review of 2625 water births. Contamination of birth pool water and risk of microbial cross-infection]. *Minerva Ginecologica*, 62(3), 203–211. [UNABLE TO TRANSLATE]
- 7
- 8
- 9 Vanderlaan J. (2017). Retrospective Cohort Study of Hydrotherapy in Labor. *Journal of obstetric, gynecologic, and neonatal nursing : JOGNN*, 46(3), 403–410. <https://doi.org/10.1016/j.jogn.2016.11.018> [WRONG STUDY DESIGN]
- 10
- 11 Vanderlaan, J., Hall, P. J., & Lewitt, M. (2018). Neonatal outcomes with water birth: A systematic review and meta-analysis. *Midwifery*, 59, 27–38. <https://doi.org/10.1016/j.midw.2017.12.023> [WRONG STUDY DESIGN]
- 12
- 13
- 14 Zaidi J, Zaidi F, Bradshaw H, Cluett ER, Getliffe K, Pickering RM, Saunders NJS, Robins JB, & Smith R. (2004). Labouring in water...Cluett ER, Pickering RM, Getliffe K, Saunders NJ. Randomised controlled trial of labouring in water compared with standard of augmentation for management of dystocia in first stage of labour. *BMJ* 2004;328:314. (7 February.). *BMJ: British Medical Journal (International Edition)*, 328(7442), 767–768. [LETTER NOT RESEARCH]
- 15
- 16
- 17
- 18
- 19 Zanetti-Dällenbach, R. A., Holzgreve, W., & Hösli, I. (2007). Neonatal group B streptococcus colonization in water births. *International Journal Of Gynaecology And Obstetrics: The Official Organ Of The International Federation Of Gynaecology And Obstetrics*, 98(1), 54–55. [WRONG OUTCOMES]
- 20
- 21
- 22
- 23 Zanetti-Dallenbach R., Lapaire O., Holzgreve W., & Hosli I. (2007). Neonatal colonization-rate with group B streptococcus is lower in neonates born underwater than after conventional vaginal delivery. *Geburtshilfe Frauenheilkd.*, 67(10), 1114–1119. [WRONG STUDY OUTCOMES]
- 24
- 25
- 26 Zanetti-Dällenbach, R., Lapaire, O., Maertens, A., Frei, R., Holzgreve, W., & Hösli, I. (2006). Water birth: Is the water an additional reservoir for group B streptococcus? *Archives Of Gynecology And Obstetrics*, 273(4), 236–238. [WRONG STUDY DESIGN]
- 27
- 28
- 29 Zhao, Y., Xiao, M., Tang, F., Tang, W., Yin, H., Sun, G. Q., Lin, Y., Zhou, Y., Luo, Y., Li, L. M., & Tan, Z. H. (2017). The effect of water immersion delivery on the strength of pelvic floor muscle and pelvic floor disorders during postpartum period: An experimental study. *Medicine*, 96(41), e8124. <https://doi.org/10.1097/MD.00000000000008124> [WRONG OUTCOMES]
- 30
- 31
- 32
- 33
- 34
- 35
- 36
- 37
- 38
- 39
- 40
- 41
- 42
- 43
- 44
- 45
- 46
- 47
- 48
- 49
- 50
- 51
- 52
- 53
- 54
- 55
- 56
- 57
- 58
- 59
- 60

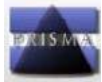

## PRISMA 2020 Checklist

| Section and Topic             | Item # | Checklist item                                                                                                                                                                                                                                                                                       | Location where item is reported |
|-------------------------------|--------|------------------------------------------------------------------------------------------------------------------------------------------------------------------------------------------------------------------------------------------------------------------------------------------------------|---------------------------------|
| <b>TITLE</b>                  |        |                                                                                                                                                                                                                                                                                                      |                                 |
| Title                         | 1      | Identify the report as a systematic review.                                                                                                                                                                                                                                                          | Title P.1                       |
| <b>ABSTRACT</b>               |        |                                                                                                                                                                                                                                                                                                      |                                 |
| Abstract                      | 2      | See the PRISMA 2020 for Abstracts checklist.                                                                                                                                                                                                                                                         | p.2                             |
| <b>INTRODUCTION</b>           |        |                                                                                                                                                                                                                                                                                                      |                                 |
| Rationale                     | 3      | Describe the rationale for the review in the context of existing knowledge.                                                                                                                                                                                                                          | p.4                             |
| Objectives                    | 4      | Provide an explicit statement of the objective(s) or question(s) the review addresses.                                                                                                                                                                                                               | p.4-5                           |
| <b>METHODS</b>                |        |                                                                                                                                                                                                                                                                                                      |                                 |
| Eligibility criteria          | 5      | Specify the inclusion and exclusion criteria for the review and how studies were grouped for the syntheses.                                                                                                                                                                                          | p. 5<br>p.7                     |
| Information sources           | 6      | Specify all databases, registers, websites, organisations, reference lists and other sources searched or consulted to identify studies. Specify the date when each source was last searched or consulted.                                                                                            | p.5<br>Supplement 1             |
| Search strategy               | 7      | Present the full search strategies for all databases, registers and websites, including any filters and limits used.                                                                                                                                                                                 | p.5<br>Supplement 1             |
| Selection process             | 8      | Specify the methods used to decide whether a study met the inclusion criteria of the review, including how many reviewers screened each record and each report retrieved, whether they worked independently, and if applicable, details of automation tools used in the process.                     | p.6-7                           |
| Data collection process       | 9      | Specify the methods used to collect data from reports, including how many reviewers collected data from each report, whether they worked independently, any processes for obtaining or confirming data from study investigators, and if applicable, details of automation tools used in the process. | p.7                             |
| Data items                    | 10a    | List and define all outcomes for which data were sought. Specify whether all results that were compatible with each outcome domain in each study were sought (e.g. for all measures, time points, analyses), and if not, the methods used to decide which results to collect.                        | p.7                             |
|                               | 10b    | List and define all other variables for which data were sought (e.g. participant and intervention characteristics, funding sources). Describe any assumptions made about any missing or unclear information.                                                                                         | p.7                             |
| Study risk of bias assessment | 11     | Specify the methods used to assess risk of bias in the included studies, including details of the tool(s) used, how many reviewers assessed each study and whether they worked independently, and if applicable, details of automation tools used in the process.                                    | p.6-7                           |
| Effect measures               | 12     | Specify for each outcome the effect measure(s) (e.g. risk ratio, mean difference) used in the synthesis or presentation of results.                                                                                                                                                                  | p.7-8                           |
| Synthesis methods             | 13a    | Describe the processes used to decide which studies were eligible for each synthesis (e.g. tabulating the study intervention characteristics and comparing against the planned groups for each synthesis (item #5)).                                                                                 | p.7-10 &<br>Table 1             |
|                               | 13b    | Describe any methods required to prepare the data for presentation or synthesis, such as handling of missing summary statistics, or data conversions.                                                                                                                                                | p.7-8                           |
|                               | 13c    | Describe any methods used to tabulate or visually display results of individual studies and syntheses.                                                                                                                                                                                               | P7-8                            |
|                               | 13d    | Describe any methods used to synthesize results and provide a rationale for the choice(s). If meta-analysis was performed, describe the model(s), method(s) to identify the presence and extent of statistical heterogeneity, and software package(s) used.                                          | p.7                             |
|                               | 13e    | Describe any methods used to explore possible causes of heterogeneity among study results (e.g. subgroup analysis, meta-regression).                                                                                                                                                                 | 7-8                             |

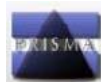

## PRISMA 2020 Checklist

| Section and Topic             | Item # | Checklist item                                                                                                                                                                                                                                                                       | Location where item is reported |
|-------------------------------|--------|--------------------------------------------------------------------------------------------------------------------------------------------------------------------------------------------------------------------------------------------------------------------------------------|---------------------------------|
|                               | 13f    | Describe any sensitivity analyses conducted to assess robustness of the synthesized results.                                                                                                                                                                                         | 7-8                             |
| Reporting bias assessment     | 14     | Describe any methods used to assess risk of bias due to missing results in a synthesis (arising from reporting biases).                                                                                                                                                              | 7-8                             |
| Certainty assessment          | 15     | Describe any methods used to assess certainty (or confidence) in the body of evidence for an outcome.                                                                                                                                                                                | 7-8                             |
| <b>RESULTS</b>                |        |                                                                                                                                                                                                                                                                                      |                                 |
| Study selection               | 16a    | Describe the results of the search and selection process, from the number of records identified in the search to the number of studies included in the review, ideally using a flow diagram.                                                                                         | PRISMA Fig 1                    |
|                               | 16b    | Cite studies that might appear to meet the inclusion criteria, but which were excluded, and explain why they were excluded.                                                                                                                                                          | Supplement 3                    |
| Study characteristics         | 17     | Cite each included study and present its characteristics.                                                                                                                                                                                                                            | Table 1,2,3 P.8-16              |
| Risk of bias in studies       | 18     | Present assessments of risk of bias for each included study.                                                                                                                                                                                                                         | Table 4 p.17-20                 |
| Results of individual studies | 19     | For all outcomes, present, for each study: (a) summary statistics for each group (where appropriate) and (b) an effect estimate and its precision (e.g. confidence/credible interval), ideally using structured tables or plots.                                                     | Fig 3-24 P.17-27                |
| Results of syntheses          | 20a    | For each synthesis, briefly summarise the characteristics and risk of bias among contributing studies.                                                                                                                                                                               | p.17 Fig 2                      |
|                               | 20b    | Present results of all statistical syntheses conducted. If meta-analysis was done, present for each the summary estimate and its precision (e.g. confidence/credible interval) and measures of statistical heterogeneity. If comparing groups, describe the direction of the effect. | Fig 3-24 P.17-27                |
|                               | 20c    | Present results of all investigations of possible causes of heterogeneity among study results.                                                                                                                                                                                       | Fig 3-24 P.17-27                |
|                               | 20d    | Present results of all sensitivity analyses conducted to assess the robustness of the synthesized results.                                                                                                                                                                           | Table 4 p.17-20                 |
| Reporting biases              | 21     | Present assessments of risk of bias due to missing results (arising from reporting biases) for each synthesis assessed.                                                                                                                                                              | Fig 3-24 P.17-27                |
| Certainty of evidence         | 22     | Present assessments of certainty (or confidence) in the body of evidence for each outcome assessed.                                                                                                                                                                                  | Table 5 p.27-28                 |
| <b>DISCUSSION</b>             |        |                                                                                                                                                                                                                                                                                      |                                 |
| Discussion                    | 23a    | Provide a general interpretation of the results in the context of other evidence.                                                                                                                                                                                                    | p.28-30                         |
|                               | 23b    | Discuss any limitations of the evidence included in the review.                                                                                                                                                                                                                      | p.30-31                         |
|                               | 23c    | Discuss any limitations of the review processes used.                                                                                                                                                                                                                                | p.31                            |
|                               | 23d    | Discuss implications of the results for practice, policy, and future research.                                                                                                                                                                                                       | p.31-32                         |
| <b>OTHER INFORMATION</b>      |        |                                                                                                                                                                                                                                                                                      |                                 |
| Registration and              | 24a    | Provide registration information for the review, including register name and registration number, or state that the review was not registered.                                                                                                                                       | p.5                             |

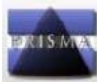

# PRISMA 2020 Checklist

| Section and Topic                              | Item # | Checklist item                                                                                                                                                                                                                             | Location where item is reported |
|------------------------------------------------|--------|--------------------------------------------------------------------------------------------------------------------------------------------------------------------------------------------------------------------------------------------|---------------------------------|
| protocol                                       | 24b    | Indicate where the review protocol can be accessed, or state that a protocol was not prepared.                                                                                                                                             | Link p.5                        |
|                                                | 24c    | Describe and explain any amendments to information provided at registration or in the protocol.                                                                                                                                            | p.5                             |
| Support                                        | 25     | Describe sources of financial or non-financial support for the review, and the role of the funders or sponsors in the review.                                                                                                              | p.33                            |
| Competing interests                            | 26     | Declare any competing interests of review authors.                                                                                                                                                                                         | p.33                            |
| Availability of data, code and other materials | 27     | Report which of the following are publicly available and where they can be found: template data collection forms; data extracted from included studies; data used for all analyses; analytic code; any other materials used in the review. | SR dedicated google drive       |

From: Page MJ, McKenzie JE, Bossuyt PM, Boutron I, Hoffmann TC, Mulrow CD, et al. The PRISMA 2020 statement: an updated guideline for reporting systematic reviews. *BMJ* 2021;372:n71. doi: 10.1136/bmj.n71  
 For more information, visit: <http://www.prisma-statement.org/>

# BMJ Open

**A systematic review and meta-analysis to examine intrapartum interventions, and maternal and neonatal outcomes following immersion in water during labour and waterbirth**

|                                 |                                                                                                                                                                                                                                                                                                                                                                     |
|---------------------------------|---------------------------------------------------------------------------------------------------------------------------------------------------------------------------------------------------------------------------------------------------------------------------------------------------------------------------------------------------------------------|
| Journal:                        | <i>BMJ Open</i>                                                                                                                                                                                                                                                                                                                                                     |
| Manuscript ID                   | bmjopen-2021-056517.R1                                                                                                                                                                                                                                                                                                                                              |
| Article Type:                   | Original research                                                                                                                                                                                                                                                                                                                                                   |
| Date Submitted by the Author:   | 11-Feb-2022                                                                                                                                                                                                                                                                                                                                                         |
| Complete List of Authors:       | Burns, Ethel ; Oxford Brookes University Faculty of Health and Life Sciences, Faculty of Health and Life Sciences<br>Feeley, Claire; Oxford Brookes University, Faculty of Health and Life Sciences<br>Hall, Priscilla J.; Emory University, VA School of Nursing Academic Partnership ;<br>Vanderlaan, Jennifer; University of Nevada Las Vegas, School of Nursing |
| <b>Primary Subject Heading</b>: | Obstetrics and gynaecology                                                                                                                                                                                                                                                                                                                                          |
| Secondary Subject Heading:      | Nursing                                                                                                                                                                                                                                                                                                                                                             |
| Keywords:                       | Pain management < ANAESTHETICS, Maternal medicine < OBSTETRICS, PRIMARY CARE                                                                                                                                                                                                                                                                                        |
|                                 |                                                                                                                                                                                                                                                                                                                                                                     |

SCHOLARONE™  
Manuscripts

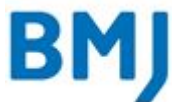

I, the Submitting Author has the right to grant and does grant on behalf of all authors of the Work (as defined in the below author licence), an exclusive licence and/or a non-exclusive licence for contributions from authors who are: i) UK Crown employees; ii) where BMJ has agreed a CC-BY licence shall apply, and/or iii) in accordance with the terms applicable for US Federal Government officers or employees acting as part of their official duties; on a worldwide, perpetual, irrevocable, royalty-free basis to BMJ Publishing Group Ltd ("BMJ") its licensees and where the relevant Journal is co-owned by BMJ to the co-owners of the Journal, to publish the Work in this journal and any other BMJ products and to exploit all rights, as set out in our [licence](#).

The Submitting Author accepts and understands that any supply made under these terms is made by BMJ to the Submitting Author unless you are acting as an employee on behalf of your employer or a postgraduate student of an affiliated institution which is paying any applicable article publishing charge ("APC") for Open Access articles. Where the Submitting Author wishes to make the Work available on an Open Access basis (and intends to pay the relevant APC), the terms of reuse of such Open Access shall be governed by a Creative Commons licence – details of these licences and which [Creative Commons](#) licence will apply to this Work are set out in our licence referred to above.

Other than as permitted in any relevant BMJ Author's Self Archiving Policies, I confirm this Work has not been accepted for publication elsewhere, is not being considered for publication elsewhere and does not duplicate material already published. I confirm all authors consent to publication of this Work and authorise the granting of this licence.

1  
2  
3  
4  
5 **A systematic review and meta-analysis to examine intrapartum interventions, and maternal and**  
6 **neonatal outcomes following immersion in water during labour and waterbirth**  
7  
8

9  
10 **Authors**

11  
12  
13 Ethel Burns

14  
15 Oxford Brookes University

16  
17 Corresponding Author: eburns@brookes.ac.uk  
18

19  
20 Claire Feely

21  
22 Oxford Brookes University

23  
24  
25 Priscilla Hall, PhD, CNM

26  
27 Emory University School of Nursing  
28

29  
30  
31 Jennifer Vanderlaan, PhD, MPH, CNM

32  
33 University of Nevada Las Vegas School of Nursing  
34  
35  
36  
37  
38  
39  
40  
41  
42  
43  
44  
45  
46  
47  
48  
49  
50  
51  
52  
53  
54  
55  
56  
57



## Abstract

### Objectives:

Water immersion during labour using a birth pool to achieve relaxation and pain relief during the first and possibly part of the second stage of labour is an increasingly popular care option in several countries. It is used particularly by healthy women who experience a straightforward pregnancy, labour spontaneously at term gestation, and plan to give birth in a midwifery led care setting. More women are also choosing to give birth in water. There is debate about the safety of intrapartum water immersion, particularly waterbirth. The objective of this study was to synthesise evidence that compared the effect of water immersion during labour or waterbirth on intrapartum interventions and outcomes to standard care with no water immersion. A secondary objective was to synthesise data relating to clinical care practices and birth settings that women experience who immerse in water and women who do not.

**Design:** Systematic Review and Meta-Analysis

**Data sources** A search was conducted using CINAHL, Medline, Embase, BioMed Central (BMC) and PsycInfo during March 2020 and was replicated in May 2021.

**Eligibility criteria for selecting studies:** Primary quantitative studies published in 2000 or later, examining maternal or neonatal interventions or outcomes using the birthing pool for labour and/or birth.

**Data extraction and synthesis** Full text screening was undertaken independently against inclusion/exclusion criteria in two pairs. Risk of bias assessment included review of 7 domains based on the Robbins-I Risk of Bias Tool. All outcomes were summarised using an odds ratio (OR) and 95% confidence interval (CI). All calculations were conducted in Comprehensive Meta-Analysis Version 3, using the inverse variance method. Results of individual studies were converted to log odds ratio and standard error for synthesis. Fixed effects models were used when  $I^2$  was less than 50%, otherwise random effects models were used. Cumulative meta-analysis and fail-safe N was calculated to determine stability and certainty of the estimates. Begg's Test and Egger's Regression Risk assessed risk of bias across studies. Trim & Fill analysis was used to estimate the magnitude of effect of the bias. Meta-regression was completed when at least ten studies provided data for an outcome

1  
2  
3 **Results:** We included 36 studies in the review, (N=157,546 participants). Thirty-one studies were  
4 conducted in an obstetric unit setting (n=70,393), four studies were conducted in midwife led settings  
5 (n=61,385) and one study was a mixed setting (OU and homebirth) (n=25,768). Midwife led settings  
6 included planned home and freestanding midwifery unit (k=1), alongside midwifery units (k=1), planned  
7 homebirth (k=1), a freestanding midwifery unit and an alongside midwifery unit (k=1), and an alongside  
8 midwifery unit (k=1). For water immersion, 25 studies involved women who planned to have a waterbirth  
9 (n=151,742), seven involved water immersion for labour only (1,901), three studies reported on water  
10 immersion during labour and waterbirth (n=3,688) and one study was unclear about the timing of water  
11 immersion (n=215).

12 Water immersion significantly reduced use of epidural (k=7, n=10,993; OR 0.17 95% CI 0.05 – 0.56),  
13 injected opioids (k=8, n=27,391; OR 0.22 95% CI 0.13 – 0.38), episiotomy (k=15, n=36,558; OR 0.16;  
14 95% CI 0.10 – 0.27), maternal pain (k=8, n=1,200; OR 0.24 95% CI 0.12 – 0.51), and postpartum  
15 hemorrhage (k=15, n=63891; OR 0.69 95% CI 0.51 – 0.95). There was an increase in Maternal  
16 satisfaction (k=6, n=4,144; OR 1.95 95% CI 1.28 – 2.96) and odds of an intact perineum (k=17, n=59070;  
17 OR 1.48; 95% CI 1.21 – 1.79) with water immersion. Waterbirth was associated with increased odds of  
18 cord avulsion (OR 1.94 95% CI 1.30 – 2.88), although the absolute risk remained low (4.3 per 1,000 vs  
19 1.3 per 1,000). There were no differences in any other identified neonatal outcomes.

20 **Limitations:** Inconsistency of reporting on birth setting, care practices, interventions and outcomes  
21 prevented us from achieving our secondary objective to account for intrapartum care variation.

22 Meta-regression was only possible for three outcomes: intact perineum, episiotomy and postpartum  
23 haemorrhage.

24 **Conclusions:** This review endorses previous reviews showing clear benefits resulting from intrapartum  
25 water immersion for healthy women, particularly when conducted in the obstetric unit setting. There is no  
26 evidence of increased risk to the newborn.

27 **Funding:** This work was supported by Oxford Brookes University

**Registration:** PROSPERO 2019 CRD42019147001 Revised July 2020

[https://www.crd.york.ac.uk/prospero/display\\_record.php?RecordID=147001&VersionID=1368697](https://www.crd.york.ac.uk/prospero/display_record.php?RecordID=147001&VersionID=1368697)

### Strengths and Limitations of the Study

- This study incorporated meta-regression, using covariates identified a priori, to identify sources of heterogeneity in previous studies.
- This study included cumulative meta-analysis and fail-safe analysis to provide estimates of the stability of the findings
- This meta-analysis was limited to studies published in any language if it could be translated into English using Google Translate, and published in 2000 or later.
- Few studies were conducted in midwifery-led settings.

### Author Contributions

EB: conceptualisation, protocol writing, investigation, methodology, writing-original draft, writing-review and editing, project administration, funding acquisition for Open Access publication.  
Dr Ethel Burns, Senior Midwifery Lecturer, Midwifery research Lead, Oxford Brookes University, Oxford UK

CF<sub>1</sub>: methodology, protocol writing, validation, writing-original draft, writing- review and editing, visualisation.  
Dr Claire Feeley, Midwife Researcher, Associate Lecturer, Oxford Brookes University, Oxford UK.

Priscilla Hall: conceptualisation, investigation, writing - original draft, writing – review and editing  
Dr Priscilla Hall, Midwife Researcher and Senior Instructor, Emory University in the Nell Hodgson Woodruff School of Nursing, Atlanta, Georgia USA

JV: conceptualisation, methodology, investigation, data curation, formal analysis, writing – original draft, writing – review and editing, visualisation.  
Assistant Professor Jennifer Vanderlaan, University of Nevada, Las Vegas School of Nursing, Nevada USA

### Scientific Advisers

VF: Methodology, validation & Investigation  
Vicki Farmilo, Health care librarian, Oxford Brookes University, Oxford, UK

RM: Methodology, Review.  
Dr Reem Malouf, Neurologist, Specialist in Internal Medicine, National Perinatal Epidemiology Units, Oxford UK

Cindy Farley (CF<sub>2</sub>): Methodology, Investigation, Review  
Associate Professor, Georgetown University, Washington DC, USA  
HC: Validation, Review

1  
2  
3 Dr Harriet Thorn-Cole, Scientific ColLabourator, University of Health Sciences of Western Switzerland,  
4 Lausanne, Switzerland.  
5

6 CR: Methodology, Review

7 Dr Charles Roehr, National Perinatal Epidemiology Unit Clinical Trials Unit, Oxford UK.  
8 Academic Consultant Neonatologist, Newborn Services, Southmead Hospital, North Bristol Trust,  
9 Bristol.  
10

### 11 **Research Ethics Approval**

12  
13 No patient involvement  
14

### 15 **Funding**

16  
17 This research received no specific grant for funding from any agency in the public, commercial or not-  
18 for-profit sectors.  
19

### 20 **Competing Interests**

21  
22 There were no competing interests.  
23

### 24 **Data Sharing Statement**

25  
26 No data-sharing agreement was required for this research.  
27  
28  
29  
30  
31  
32  
33  
34  
35  
36  
37  
38  
39  
40  
41  
42  
43  
44  
45  
46  
47  
48  
49  
50  
51  
52  
53  
54  
55  
56  
57

## Introduction

Immersion in a birthing pool offers women a non-pharmacological option of pain relief during labour, which also enhances their sense of control. Resting and labouring in water can reduce fear, anxiety and pain perception; it helps optimise the physiology of childbirth through the release of endogenous endorphins and oxytocin.[1] Evidence from randomised controlled trials (RCTs) showed that labouring in water reduces the need for epidural analgesia whilst identifying no adverse maternal or neonatal effects.[2] In the UK, most birthing pool use occurs in midwifery-led birth settings: these include alongside midwifery units (co-located with a maternity hospital setting) and freestanding midwifery units (FMU) (in the community setting) and home birth.[3] The outcomes of birthing pool use may be different in midwifery-led settings compared to an obstetric setting because healthy women experience fewer interventions and operative birth when the birth occurs in a midwifery-led setting compared to an obstetric setting.[3]

Variations in care between waterbirth services may contribute to the differences in outcomes with water immersion, particularly variations in use of labour augmentation, hands on/off the perineum for the birth, pushing position, use of active management of third stage of labour, and placenta birth in the water.[4-10] It is likely that woman who use water immersion for labour and birth experience different care practices than women who have standard birth care. Though prior evidence has found no increased risk of adverse events for newborns born in water, heterogeneity in outcomes and limited reporting of the clinical guidance used for water immersion make implementation of evidence-based guidelines difficult.[11-13] There is a need to understand which clinical practices, when performed as part of water immersion care, result in the optimum outcomes for mother and newborn. It has been argued that an international RCT would be desirable.[14, 15] However, a RCT proposal is likely to encounter ethical and recruitment challenges due to increasing acknowledgment of the importance of enabling women to take an active part in decision-making during labour. Additionally, an unblinded trial and expected uneven crossover carry an inevitable limitation.[16]

1  
2  
3 Water immersion in a birth pool during labour and birth can be divided into two distinct but overlapping  
4 categories. Water immersion during labour involves using a birth pool to achieve relaxation and pain  
5 relief during the first and possibly part of the second stage of labour but exiting the pool for the birth.  
6  
7

8  
9 With this practice, the infant emerges into air to breathe. With waterbirth, the woman remains in the birth  
10 pool for the birth of the baby. The infant emerges into the water and is brought to the surface to initiate  
11 breathing.  
12  
13  
14

15  
16 The primary objective of this systematic review was to compare intrapartum interventions and outcomes  
17 for water immersion during labour/waterbirth to standard care with no water immersion. The secondary  
18 objective was to analyse data reported for clinical care practices and birth settings experienced by women  
19 who use water and women who do not.  
20  
21  
22  
23

#### 24 *Review questions*

25  
26 What interventions do women experience with water immersion for labour and birth?  
27

28 What are the maternal and newborn outcomes following water immersion during labour and waterbirth  
29 compared with similar women who labour and/or give birth on land?  
30  
31

### 32 **Methods**

33  
34 A protocol for the review was published in the International Prospective Register of Systematic Reviews  
35 PROSPERO2019 CRD42019147001 prior to completion of the searches. The PRISMA 2020 guideline  
36 was followed for conducting this work.[17] Institutional Review Board approval was not sought as meta-  
37 analyses are not human subjects research.  
38  
39  
40  
41  
42

#### 43 *Patient and Public Involvement*

44  
45 Patients were not involved in the development of the research question, study design, or selection of  
46 outcome measures.  
47  
48

#### 49 *Eligibility*

50  
51 Studies using any primary quantitative study design published in peer-reviewed journal or unpublished  
52 thesis.  
53  
54

- 1) Studies that examined maternal or neonatal interventions and/or outcomes when using the birthing pool for labour and/or birth.
- 2) Studies published in 2000 or later
- 3) Studies conducted in any language if it could be translated into English using Google Translate.

### *Search Strategy*

A search was conducted using CINAHL, Medline, Embase, BioMed Central (BMC) and PsycInfo during March 2020. The search was replicated in May 2021. A predesigned search strategy was designed using the PICOT/PEOT framework to develop search terms.[18]

- Population: women in labour and early postpartum
- Exposure: water immersion during labour and/or birth
- Comparison: no water immersion during labour or birth
- Outcomes: *Maternal*: artificial rupture of the membranes, need for labour augmentation, epidural analgesia, opioid injection, planned and actual place of birth, reason for transfer to an obstetric setting, mode of birth, perineal trauma, third stage management, postpartum haemorrhage/blood transfusion, infection, breastfeeding initiation. *Newborn*: APGAR score, resuscitation, admission to a neonatal intensive care unit (NICU), infection, breastfeeding at 6 weeks
- Time: labour and early puerperium

A tested, sensitive, and reproducible search strategy was developed with the specialist healthcare librarian, VF.[19] The refined search terms and strategy with Boolean operators are provided in Supplement 1. These were adapted for specific database architecture. Additional searches were carried out via referencing, checking all included studies with no further records found. Publication alerts were set up via BMC updates that alerted CF<sub>1</sub> to a new publication that met our inclusion/exclusion criteria. A final search to determine if any additional papers were published after analysis was conducted by VF in May 2021.

### *Study selection*

1  
2  
3 Records were de-duplicated in Zotero and collated into Rayyan systematic review software.[20]  
4  
5 Initial screening (title/abstract) was carried out blind by HTC, CF<sub>1</sub>, CF<sub>2</sub> against the inclusion/exclusion  
6  
7 criteria. Consensus meetings were held to discuss and resolve disagreements. Full text screening was  
8  
9 carried out independently against the inclusion/exclusions criteria and in pairs: JV and CF<sub>1</sub>, EB and PH.  
10  
11 Disagreements were resolved by consensus meeting. In the case of duplication of a sample across  
12  
13 multiple papers, the paper which provided the largest sample for each outcome provided the data for  
14  
15 synthesis.

### 16 17 *Data Collection Process & Data Items*

18  
19 Data collection was completed using pilot tested forms created in REDCap data collection  
20  
21 software. Researchers worked in teams of two (JV and EB, JV and PH) to individually abstract data for  
22  
23 each study, identify discrepancies, and reach consensus when needed. Data collected included the study  
24  
25 type; sample characteristics, care practices for water immersion, if it was a midwifery-led setting; rates of  
26  
27 interventions including amniotomy, labour induction, augmentation, fetal monitoring, epidural, injected  
28  
29 opioid, episiotomy, and active management of third stage; and outcome data including mode of birth,  
30  
31 level of pain, maternal satisfaction, intact perineum, obstetric anal sphincter injury, shoulder dystocia,  
32  
33 maternal infection defined by symptoms and positive test, primary postpartum haemorrhage, manual  
34  
35 removal of the placenta, 5-minute APGAR, newborn resuscitation, transient tachypnoea of the newborn,  
36  
37 respiratory distress of the newborn, neonatal intensive unit admission within the first 24 hours and lasting  
38  
39 for 48 hours, death in neonatal period, newborn infection defined by both symptoms and positive test,  
40  
41 cord avulsion, and breastfeeding initiation.

### 42 43 *Risk of bias assessment*

44  
45 Risk of bias assessment included review of 7 domains based on the Robbins-I Risk of Bias  
46  
47 Tool.[21] The domains included bias due to confounding, bias in selection of participants, bias in  
48  
49 measurement of intervention, bias due to departures of intended treatment, bias in measurement of  
50  
51 outcomes, bias due to missing data, bias in selection of reported results. Bias due to departure of intended  
52  
53 treatment was modified to track studies that did not provide information about water immersion use for  
54  
55  
56  
57  
58  
59  
60



1  
2  
3 the control group. Risk of bias assessment was completed independently by two researchers (JV and EB,  
4 JV and PH). Disagreements were resolved by consensus meeting.

### 7 *Summary Measures & Synthesis of Results*

9 All outcomes were summarized using an odds ratio (OR) and 95% confidence interval (CI). All  
10 calculations were conducted in Comprehensive Meta-Analysis Version 3, using the inverse variance  
11 method.[22] Results of individual studies were converted to log odds ratio and standard error for  
12 synthesis. Fixed effects models were used when  $I^2$  was less than 50%, otherwise random effects models  
13 were used. This decision was made because 1) the population eligible for water immersion is restricted to  
14 women at low risk of birth complications and 2) the goal of the analysis was to determine if variations in  
15 care practices result in changes in outcomes. Outcomes without adequate heterogeneity in estimates were  
16 considered unlikely to be affected by care practices and so a fixed effects model was appropriate for  
17 analysis. When possible, subgroup analysis was conducted to determine effect of the birth setting and  
18 parity on the estimate. In addition, analysis limited to studies published within the past 10 years was  
19 conducted when possible. Per protocol, we intended to conduct subgroup analysis by maternal age,  
20 maternal BMI, prior caesarean, and pool type, however the data did not allow for these analyses. Forest  
21 plots were created in RevMan v5.4.1.[23]

### 36 *Additional Analyses*

37 Begg's Test and Egger's Regression Risk assessed risk of bias across studies.[24] Trim & Fill  
38 analysis was used to estimate the magnitude of effect of the bias.[25] Meta-regression was completed  
39 when at least ten studies provided data for an outcome when  $I^2 > 50\%$ .[26, 27] Tested covariates included  
40 the sample characteristics and care practices identified a priori as the structure and process variables  
41 likely to be responsible for heterogeneity in the outcomes. Directed acyclic graphs (DAG) of the  
42 covariates and their role are available in Supplement 2.[28] For continuous covariates, the rate of a  
43 covariate (e.g. the induction rate in the sample) were used for regression. Categorical covariates were  
44 coded as dichotomous (e.g. described appropriate birth pool or did not describe the immersion  
45 receptacle).

### *Certainty Assessment*

The fail-safe N estimates was calculated to determine the number of studies necessary to change the estimates.[29] Fail-safe calculates the number of studies needed to change the estimate. Cumulative meta-analysis was used to identify the stability of the estimates over time.[30] Assessment of certainty with GRADE criteria was considered inappropriate for this review because the goal of this study was to identify variations between reports of outcomes with water immersion that contribute to inconsistency, imprecision, variations, and confounding – three assessments made when considering certainty of evidence. However, the authors recognize the importance of a standardized GRADE assessment for readers. The individual assessments made in this review were prepared in a table outlining scores per standard Grade criteria as a supplement.

## **Results**

### *Study Selection*

The searches generated 2,113 hits, reduced to 1,667 after duplicates were removed; n=1,561 records were discarded at the initial screening stage. Of 106 records that were full-text screened, n=71 records did not meet the criteria. See Supplement 3 for the list of excluded studies and the reasons. One additional study was found via BMC updates, therefore, k=36 papers reporting on outcomes for 153,236 women were included into the review. Figure 1 PRISMA diagram illustrates the study selection process.<sup>[17]</sup>

[Insert Figure 1 Here]

### *Study Description*

Most studies (k=31) were conducted in an obstetric setting or did not adequately report the setting, four studies were conducted in midwife-led settings, and one study mixed settings. Midwifery-led settings included planned home and birth centre births, a birth centre (not explicitly described as freestanding) and an alongside midwifery unit (co-located in an obstetric unit). Studies included randomised controlled trials (k=7; n=2,666), prospective studies (k=13; n=30,085), retrospective studies (k=15; n=120,474), and one pre-post study (n=11). Studies reported on waterbirth (k=25; n=146,499),

1  
2  
3  
4  
5  
6  
7  
8  
9  
10  
11  
12  
13  
14  
15  
16  
17  
18  
19  
20  
21  
22  
23  
24  
25  
26  
27  
28  
29  
30  
31  
32  
33  
34  
35  
36  
37  
38  
39  
40  
41  
42  
43  
44  
45  
46  
47  
48  
49  
50  
51  
52  
53  
54  
55  
56  
57  
58  
59  
60

water immersion for labour (k=7; n=1,901), both (k=3; n=4,621) and one whose timing of immersion could not be determined (n=215). Full information is available in Table 1.

For peer review only

Table 1: Characteristics of included studies; Meta-analysis of water immersion for labour and birth

| Author             | Study    |           | Immersion  | Sample | Interventions and Outcomes Reported |
|--------------------|----------|-----------|------------|--------|-------------------------------------|
|                    | Type     | Setting   | Exposure   | Size   |                                     |
| Bailey, 2019       | RCT      | Obstetric | Waterbirth | 2,422  | 1, 5, 10, 11, 13, 17                |
| Barry, 2020        | PO       | Obstetric | Both       | 380    | 8, 10, 11, 13, 17, 23               |
| Benfield, 2010     | Pre-Post | Obstetric | Labor      | 11     | 4, 7                                |
| Bovbjerg, 2016     | RO       | Midwifery | Waterbirth | 18,355 | 10, 11, 12, 17, 21                  |
| Cluett, 2004       | RCT      | Obstetric | Labor      | 99     | 2, 6, 7, 8, 15, 16                  |
| da Silva, 2009     | RCT      | Obstetric | Labor      | 108    | 2, 4, 7, 10, 12, 17                 |
| Eckert, 2001       | RCT      | Obstetric | Labor      | 274    | 1, 5, 6, 7, 8, 11, 12, 16, 17, 18   |
| Geisbuehler, 2002  | PO       | Obstetric | Waterbirth | 5,584  | 12, 20                              |
| Geissbuehler, 2004 | PO       | Obstetric | Waterbirth | 9,518  | 5, 9, 10, 11, 13, 15, 17            |
| Geissbuehler, 2000 | PO       | Obstetric | Waterbirth | 7,508  | 6, 16                               |
| Haslinger, 2015    | RO       | Obstetric | Waterbirth | 7,832  | 11, 12                              |
| Henderson, 2014    | PO       | Obstetric | Both       | 3,078  | 2, 3, 8, 10, 12, 13, 14, 18         |
| Hodgson, 2020      | RO       | Mixed     | Waterbirth | 25,768 | 4, 11, 17, 18                       |
| Jacoby, 2019       | RO       | Obstetric | Waterbirth | 23,036 | 11, 13, 15, 17, 18, 20, 21, 23      |
| Lathrop, 2018      | PO       | Obstetric | Waterbirth | 198    | 13, 16                              |

|    |                       |     |           |            |        |                                                   |
|----|-----------------------|-----|-----------|------------|--------|---------------------------------------------------|
| 1  |                       |     |           |            |        |                                                   |
| 2  |                       |     |           |            |        |                                                   |
| 3  | Lim, 2016             | RO  | Obstetric | Waterbirth | 236    | 4, 9, 10, 12, 13, 14, 17, 19                      |
| 4  |                       |     |           |            |        |                                                   |
| 5  | Liu, 2014             | PO  | Obstetric | Labor      | 108    | 4, 7, 8, 13                                       |
| 6  |                       |     |           |            |        |                                                   |
| 7  | Mallen-Perez, 2018    | PO  | Obstetric | Unclear    | 215    | 7                                                 |
| 8  |                       |     |           |            |        |                                                   |
| 9  | Menakaya, 2013        | RO  | Obstetric | Waterbirth | 438    | 9, 10, 11, 12, 13, 17, 18                         |
| 10 |                       |     |           |            |        |                                                   |
| 11 | Mollamahmutoglu, 2012 | PO  | Obstetric | Waterbirth | 602    | 1, 7, 10, 12, 13                                  |
| 12 |                       |     |           |            |        |                                                   |
| 13 | Neiman, 2020          | RO  | Obstetric | Both       | 230    | 4, 8, 9, 10, 12, 13, 17, 22, 23                   |
| 14 |                       |     |           |            |        |                                                   |
| 15 | Ohlsson, 2001         | RCT | Obstetric | Labor      | 1,237  | 6, 8, 11, 14, 19, 20                              |
| 16 |                       |     |           |            |        |                                                   |
| 17 | Otigbah, 2000         | RO  | Obstetric | Waterbirth | 602    | 1, 4, 5, 9, 10, 11, 12, 13                        |
| 18 |                       |     |           |            |        |                                                   |
| 19 | Pagano, 2010          | RO  | Obstetric | Waterbirth | 220    | 10, 17                                            |
| 20 |                       |     |           |            |        |                                                   |
| 21 | Peacock, 2018         | RO  | Obstetric | Waterbirth | 3,507  | 17                                                |
| 22 |                       |     |           |            |        |                                                   |
| 23 | Preston, 2019         | RO  | Midwifery | Waterbirth | 15,734 | 5, 9, 11                                          |
| 24 |                       |     |           |            |        |                                                   |
| 25 | Ros, 2009             | PO  | Obstetric | Waterbirth | 54     | 17                                                |
| 26 |                       |     |           |            |        |                                                   |
| 27 | Sert, 2019            | RCT | Obstetric | Labor      | 64     | 17                                                |
| 28 |                       |     |           |            |        |                                                   |
| 29 | Snapp, 2019           | RO  | Midwifery | Waterbirth | 26,684 | 9, 10, 13, 17, 21, 23                             |
| 30 |                       |     |           |            |        |                                                   |
| 31 | Thoeni, 2005          | RO  | Obstetric | Waterbirth | 1,600  | 10, 11, 12                                        |
| 32 |                       |     |           |            |        |                                                   |
| 33 | Torkamani, 2010       | PO  | Obstetric | Waterbirth | 100    | 5, 7, 12                                          |
| 34 |                       |     |           |            |        |                                                   |
| 35 | Ulfsdottir, 2018      | RO  | Midwifery | Waterbirth | 612    | 1, 2, 3, 4, 6, 10, 11, 12, 13, 14, 16, 17, 23, 24 |
| 36 |                       |     |           |            |        |                                                   |
| 37 | Woodward, 2004        | RCT | Obstetric | Waterbirth | 80     | 4, 5, 6, 8, 10, 17, 24                            |
| 38 |                       |     |           |            |        |                                                   |
| 39 |                       |     |           |            |        |                                                   |
| 40 |                       |     |           |            |        |                                                   |
| 41 |                       |     |           |            |        |                                                   |
| 42 |                       |     |           |            |        |                                                   |
| 43 | 14                    |     |           |            |        |                                                   |
| 44 |                       |     |           |            |        |                                                   |
| 45 |                       |     |           |            |        |                                                   |
| 46 |                       |     |           |            |        |                                                   |
| 47 |                       |     |           |            |        |                                                   |

|                          |    |           |            |     |                          |
|--------------------------|----|-----------|------------|-----|--------------------------|
| Zanetti-Dallenbach, 2006 | PO | Obstetric | Waterbirth | 513 | 2, 3, 6, 9, 12           |
| Zanetti-Dallenbach, 2007 | PO | Obstetric | Waterbirth | 368 | 4, 5, 10, 11, 13, 14, 17 |
| Ziolkowski, 2009         | RO | Obstetric | Waterbirth | 171 | 16, 17                   |

---

Study Type Key: RCT, Randomised Controlled Trial; PO, Prospective Observational; RO, Retrospective Observational

Interventions & Outcomes Key: 1) Labour Induction 2) Amniotomy 3) Augmentation 4) Fetal Monitoring 5) Opioids 6) Epidural 7) Pain 8) Cesarean Delivery 9) Shoulder Dystocia 10) Intact Perineum 11) OASI 12) Episiotomy 13) Postpartum Hemorrhage 14) Manual Removal of Placenta 15) Maternal Infection 16) Maternal Satisfaction 17) 5-Minute APGAR 18) Newborn Resuscitation 19) Transient Tachypnea of the Newborn 20) Respiratory Distress of the Newborn 21) Neonatal Death 22) Infection in newborn period 23) Cord Avulsion 24) Breastfeeding Initiation

No studies provided comparison data for third stage management.

No studies met the definition used for neonatal intensive care unit admission.

1  
2  
3                   Studies reported on 157,546 total participants, though for some studies subgroup analyses were  
4  
5 appropriate for this review. Few studies provided sample characteristics beyond parity (See Table 2).  
6  
7 Eleven studies reported the sample was restricted to persons in spontaneous Labour while seven included  
8  
9 the rate of labour induction for each group. Two studies excluded participation based on BMI while six  
10  
11 provided weight or BMI distributions in the sample characteristics. Most studies (k=19; n=77,180)  
12  
13 excluded multiple pregnancies, the rest did not address this characteristic. Prior caesarean was excluded  
14  
15 by seven studies (n=2,292) and reported as a sample characteristic for five studies (n=22,439).  
16  
17  
18  
19  
20  
21  
22  
23  
24  
25  
26  
27  
28  
29  
30  
31  
32  
33  
34  
35  
36  
37  
38  
39  
40  
41  
42  
43  
44  
45  
46  
47  
48  
49  
50  
51  
52  
53  
54  
55  
56  
57  
58  
59  
60

Table 2: Reported characteristics of study samples abstracted from inclusion and exclusion criteria or sample descriptions

| Author             | Excludes    | Excludes Induced | Excludes for | Excludes  | Excludes Prior |
|--------------------|-------------|------------------|--------------|-----------|----------------|
|                    | Multiparous | Labour           | BMI          | Multiples | Cesarean       |
| Bailey, 2019       | Yes         | No               | No           | Yes       | No             |
| Barry, 2020        | Yes         | Yes              | >30          | Yes       | n.d.           |
| Benfield, 2010     | Yes         | n.d.             | n.d.         | n.d.      | n.d.           |
| Bovbjerg, 2016     | Yes         | n.d.             | n.d.         | Yes       | No             |
| Cluett, 2004       | Yes         | Yes              | n.d.         | n.d.      | n.d.           |
| da Silva, 2009     | Yes         | n.d.             | n.d.         | Yes       | n.d.           |
| Eckert, 2001       | Yes         | No               | n.d.         | Yes       | n.d.           |
| Geissbuehler, 2002 | Yes         | n.d.             | n.d.         | n.d.      | n.d.           |
| Geissbuehler, 2004 | Yes         | n.d.             | >40          | n.d.      | n.d.           |
| Geissbuehler, 2000 | Yes         | n.d.             | n.d.         | n.d.      | n.d.           |
| Haslinger, 2015    | Yes         | n.d.             | n.d.         | Yes       | n.d.           |
| Henderson, 2014    | Yes         | No               | n.d.         | n.d.      | No             |
| Hodgson, 2020      | Yes         | n.d.             | n.d.         | Yes       | n.d.           |
| Jacoby, 2019       | Yes         | Yes              | n.d.         | Yes       | n.d.           |



1  
2  
3  
4  
5  
6  
7  
8  
9  
10  
11  
12  
13  
14  
15  
16  
17  
18  
19  
20  
21  
22  
23  
24  
25  
26  
27  
28  
29  
30  
31  
32  
33  
34  
35  
36  
37  
38  
39  
40  
41  
42  
43  
44  
45  
46  
47

|                       |     |      |      |      |      |
|-----------------------|-----|------|------|------|------|
| Lathrop, 2018         | Yes | n.d. | n.d. | Yes  | n.d. |
| Lim, 2016             | Yes | n.d. | n.d. | Yes  | No   |
| Liu, 2014             | No  | n.d. | No   | Yes  | Yes  |
| Mallen-Perez, 2018    | Yes | Yes  | No   | Yes  | n.d. |
| Menakaya, 2013        | Yes | Yes  | n.d. | Yes  | n.d. |
| Mollamahmutoglu, 2012 | Yes | No   | No   | n.d. | Yes  |
| Neiman, 2020          | Yes | Yes  | n.d. | Yes  | Yes  |
| Ohlsson, 2001         | Yes | n.d. | n.d. | Yes  | n.d. |
| Otigbah, 2000         | Yes | No   | n.d. | n.d. | n.d. |
| Pagano, 2010          | Yes | n.d. | n.d. | n.d. | n.d. |
| Peacock, 2018         | Yes | Yes  | n.d. | n.d. | n.d. |
| Preston, 2019         | Yes | Yes  | No   | n.d. | n.d. |
| Ros, 2009             | Yes | n.d. | n.d. | Yes  | Yes  |
| Sert, 2019            | Yes | Yes  | n.d. | n.d. | Yes  |
| Snapp, 2019           | Yes | n.d. | n.d. | n.d. | n.d. |
| Thoeni, 2005          | No  | n.d. | n.d. | Yes  | Yes  |
| Torkamani, 2010       | Yes | n.d. | n.d. | n.d. | n.d. |
| Ulfsdottir, 2018      | Yes | Yes  | No   | n.d. | No   |

|    |                          |     |      |      |      |      |
|----|--------------------------|-----|------|------|------|------|
| 1  |                          |     |      |      |      |      |
| 2  |                          |     |      |      |      |      |
| 3  | Woodward, 2004           | Yes | Yes  | n.d. | n.d. | Yes  |
| 4  |                          |     |      |      |      |      |
| 5  | Zanetti-Dallenbach, 2006 | Yes | n.d. | n.d. | Yes  | n.d. |
| 6  |                          |     |      |      |      |      |
| 7  | Zanetti-Dallenbach, 2007 | Yes | n.d. | n.d. | Yes  | n.d. |
| 8  |                          |     |      |      |      |      |
| 9  | Ziolkowski, 2009         | No  | n.d. | n.d. | n.d. | n.d. |
| 10 |                          |     |      |      |      |      |

11  
12 n.d. This item was not described in the paper; it was neither listed as an inclusion/exclusion criteria nor in the description of the sample.  
13  
14  
15  
16  
17  
18  
19  
20  
21  
22  
23  
24  
25  
26  
27  
28  
29  
30  
31  
32  
33  
34  
35  
36  
37  
38  
39  
40  
41  
42

1  
2  
3 Few studies provided descriptions of the care practices used with water immersion and water  
4 birth (See Table 3). The description of the immersion receptacle used was adequate to determine the  
5 woman had freedom of movement in seven studies (n=3,273). Method of induction was not reported.  
6  
7 Sixteen studies reported a fetal heart monitoring method as either intermittent auscultation (k=10;  
8 n=50,846), continuous monitoring (k=5; n=967) or a mix of methods (k=1; n=367). Six studies reported  
9 using “hands-off” (k=4; n=5,595) or “hands-on” (k=2; n=6,463) the perineum. Third stage management  
10 was reported by six studies (n=5,595), all indicating that active management was used. Three studies  
11 indicated whether the placenta and membranes were delivered in the birth pool (k=1; n=513) or out of the  
12 birth pool (k=2; n=1,396).  
13  
14  
15  
16  
17  
18  
19  
20  
21  
22  
23  
24  
25  
26  
27  
28  
29  
30  
31  
32  
33  
34  
35  
36  
37  
38  
39  
40  
41  
42  
43  
44  
45  
46  
47  
48  
49  
50  
51  
52  
53  
54  
55  
56  
57  
58  
59  
60

Table 3: Description of care practices reported in included studies

| <b>Author</b>      | <b>Appropriate<br/>Pool Described</b> | <b>Induction<br/>Method</b> | <b>Intermittent<br/>Auscultation</b> | <b>Perineum<br/>Method</b> | <b>3<sup>rd</sup> Stage<br/>Management</b> | <b>Placenta &amp;<br/>Membranes</b> |
|--------------------|---------------------------------------|-----------------------------|--------------------------------------|----------------------------|--------------------------------------------|-------------------------------------|
| Bailey, 2019       | No                                    | n.d.                        | n.d.                                 | n.d.                       | Active                                     | Out of Pool                         |
| Barry, 2020        | Yes                                   | None                        | Mixed                                | Hands Off                  | Active                                     | n.d.                                |
| Benfield, 2010     | No                                    | n.d.                        | No                                   | n.d.                       | n.d.                                       | n.d.                                |
| Bovbjerg, 2016     | No                                    | n.d.                        | n.d.                                 | n.d.                       | n.d.                                       | n.d.                                |
| Cluett, 2004       | Yes                                   | None                        | n.d.                                 | n.d.                       | n.d.                                       | n.d.                                |
| da Silva, 2009     | No                                    | n.d.                        | No                                   | n.d.                       | n.d.                                       | n.d.                                |
| Eckert, 2001       | Yes                                   | n.d.                        | n.d.                                 | n.d.                       | n.d.                                       | n.d.                                |
| Geissbuehler, 2002 | No                                    | n.d.                        | Yes                                  | n.d.                       | n.d.                                       | n.d.                                |
| Geissbuehler, 2004 | No                                    | n.d.                        | Yes                                  | n.d.                       | n.d.                                       | n.d.                                |
| Geissbuehler, 2000 | No                                    | n.d.                        | Yes                                  | n.d.                       | n.d.                                       | n.d.                                |

1  
2  
3  
4  
5  
6  
7  
8  
9  
10  
11  
12  
13  
14  
15  
16  
17  
18  
19  
20  
21  
22  
23  
24  
25  
26  
27  
28  
29  
30  
31  
32  
33  
34  
35  
36  
37  
38  
39  
40  
41  
42  
43  
44  
45  
46  
47

|                       |     |      |      |           |        |             |
|-----------------------|-----|------|------|-----------|--------|-------------|
| Haslinger, 2015       | No  | n.d. | n.d. | Hands On  | n.d.   | n.d.        |
| Henderson, 2014       | No  | n.d. | n.d. | Hands Off | Active | n.d.        |
| Hodgson, 2020         | No  | n.d. | Yes  | n.d.      | n.d.   | n.d.        |
| Jacoby, 2019          | No  | None | n.d. | n.d.      | n.d.   | n.d.        |
| Lathrop, 2018         | No  | n.d. | n.d. | n.d.      | n.d.   | n.d.        |
| Lim, 2016             | No  | n.d. | No   | n.d.      | n.d.   | n.d.        |
| Liu, 2014             | No  | n.d. | Yes  | n.d.      | n.d.   | n.d.        |
| Mallen-Perez, 2018    | Yes | None | n.d. | n.d.      | n.d.   | n.d.        |
| Menakaya, 2013        | Yes | None | n.d. | n.d.      | n.d.   | n.d.        |
| Mollamahmutoglu, 2012 | Yes | n.d. | Yes  | Hands Off | Active | n.d.        |
| Neiman, 2020          | No  | None | Yes  | n.d.      | n.d.   | n.d.        |
| Ohlsson, 2001         | No  | n.d. | n.d. | n.d.      | n.d.   | n.d.        |
| Otigbah, 2000         | Yes | n.d. | Yes  | Hands Off | Active | Out of Pool |
| Pagano, 2010          | No  | n.d. | n.d. | n.d.      | n.d.   | n.d.        |

|    |                          |     |      |      |          |        |         |
|----|--------------------------|-----|------|------|----------|--------|---------|
| 1  |                          |     |      |      |          |        |         |
| 2  |                          |     |      |      |          |        |         |
| 3  | Peacock, 2018            | No  | None | n.d. | n.d.     | n.d.   | n.d.    |
| 4  |                          |     |      |      |          |        |         |
| 5  |                          |     |      |      |          |        |         |
| 6  | Preston, 2019            | No  | None | n.d. | n.d.     | n.d.   | n.d.    |
| 7  |                          |     |      |      |          |        |         |
| 8  |                          |     |      |      |          |        |         |
| 9  | Ros, 2009                | No  | n.d. | n.d. | n.d.     | n.d.   | n.d.    |
| 10 |                          |     |      |      |          |        |         |
| 11 | Sert, 2019               | Yes | None | n.d. | n.d.     | n.d.   | n.d.    |
| 12 |                          |     |      |      |          |        |         |
| 13 |                          |     |      |      |          |        |         |
| 14 | Snapp, 2019              | No  | n.d. | n.d. | n.d.     | n.d.   | n.d.    |
| 15 |                          |     |      |      |          |        |         |
| 16 |                          |     |      |      |          |        |         |
| 17 | Thoeni, 2005             | No  | n.d. | n.d. | Hands On | n.d.   | n.d.    |
| 18 |                          |     |      |      |          |        |         |
| 19 |                          |     |      |      |          |        |         |
| 20 | Torkamani, 2010          | No  | n.d. | n.d. | n.d.     | n.d.   | n.d.    |
| 21 |                          |     |      |      |          |        |         |
| 22 |                          |     |      |      |          |        |         |
| 23 | Ulfsdottir, 2018         | Yes | None | No   | n.d.     | n.d.   | n.d.    |
| 24 |                          |     |      |      |          |        |         |
| 25 | Woodward, 2004           | No  | None | Yes  | n.d.     | n.d.   | n.d.    |
| 26 |                          |     |      |      |          |        |         |
| 27 |                          |     |      |      |          |        |         |
| 28 | Zanetti-Dallenbach, 2006 | No  | n.d. | No   | n.d.     | Active | In Pool |
| 29 |                          |     |      |      |          |        |         |
| 30 |                          |     |      |      |          |        |         |
| 31 | Zanetti-Dallenbach, 2007 | No  | n.d. | No   | n.d.     | n.d.   | n.d.    |
| 32 |                          |     |      |      |          |        |         |
| 33 |                          |     |      |      |          |        |         |
| 34 | Ziolkowski, 2009         | No  | n.d. | Yes  | n.d.     | n.d.   | n.d.    |
| 35 |                          |     |      |      |          |        |         |

---

n.d. Care practice not described in the paper in methods or results.

### *Risk of Bias Assessment*

Overall risk of bias is presented in Figure 2. Domain 3, bias due to comparability of the groups, was most often identified in retrospective studies that did not provide adequate sample restriction to ensure comparability. Domain 4, bias due to departure from intended treatment, had the highest potential for bias because studies did not provide information about if or why the comparison group included persons who used water in labour but not during birth. Bias in measurement of outcomes was rare because most outcomes were standard medical record items. However, measurement for pain and maternal satisfaction was not consistently described. Individual study results and risk of bias for each outcome are provided in the forest plots found in Figures 3-24.

[Insert Figure 2]

**Labour Induction.** Three studies provided data on labour induction (n=2,008), all conducted after 2010. Overall, this analysis found no difference between use of labour induction with water immersion and standard care (OR 0.43; 95% CI 0.16 – 1.16; random effects; Q=20.7 p<.001; I<sup>2</sup>=90%). Subgroup analysis of studies reporting in an obstetric setting remained no difference. Results of the subgroup analyses are in Table 4. Three studies were too few for cumulative meta-analysis. Two additional studies indicated there was no difference but did not provide data to synthesise.

[Insert Figure 3]

Table 4: Results of subgroup analysis of interventions on outcomes of water immersion for labour and waterbirth compared to standard care.

|                                    | Outcome | Studies | Sample | Effect      | Heterogeneity    |
|------------------------------------|---------|---------|--------|-------------|------------------|
|                                    |         |         |        | OR (95% CI) | Q (p)            |
|                                    |         |         |        | Model       | I <sup>2</sup> % |
| <b>Labor Induction<sup>a</sup></b> |         |         |        |             |                  |

|                                 |   |                      |                    |           |
|---------------------------------|---|----------------------|--------------------|-----------|
| Obstetric Units                 | 2 | 604 Immersion        | 0.32 (0.06 – 1.58) | 18 (<.01) |
|                                 |   | 792 Standard Care    | Random Effects     | 94%       |
| <b>Amniotomy<sup>a</sup></b>    |   |                      |                    |           |
| Obstetric Units                 | 4 | 306 Immersion        | 0.95 (0.62 – 1.46) | 5 (.17)   |
|                                 |   | 709 Standard Care    | Random Effects     | 40%       |
| 2010 and Earlier                | 3 | 192 Immersion        | 0.87 (0.46 – 1.64) | 4 (.13)   |
|                                 |   | 250 Standard care    | Random Effects     | 51%       |
| 2011 and Later                  | 2 | 420 Immersion        | 0.56 (0.15 – 2.02) | 14 (<.01) |
|                                 |   | 765 Standard care    | Random Effects     | 93%       |
| <b>Augmentation<sup>a</sup></b> |   |                      |                    |           |
| Obstetric Units                 | 2 | 203 Immersion        | 0.48 (0.16 – 1.51) | 6 (.02)   |
|                                 |   | 605 Standard Care    | Random Effects     | 83%       |
| 2011 and Later                  | 2 | 420 Immersion        | 0.32 (0.05 – 2.24) | 19 (<.01) |
|                                 |   | 765 Standard care    | Random Effects     | 95%       |
| <b>Opioid Use</b>               |   |                      |                    |           |
| 2010 and Earlier                | 6 | 4,298 Immersion      | 0.23 (0.08 – 0.70) | 95 (<.01) |
|                                 |   | 6,565 Standard care  | Random Effects     | 95%       |
| 2011 and Later                  | 2 | 1,641 Immersion      | 0.17 (0.15 – 0.20) | 0 (.54)   |
|                                 |   | 14,887 Standard care | Fixed Effects      | 0%        |
| <b>Epidural<sup>a</sup></b>     |   |                      |                    |           |
| Obstetric Units                 | 6 | 4,104 Immersion      | 0.26 (0.08 – 0.83) | 89 (<.01) |
|                                 |   | 6,889 Standard Care  | Random Effects     | 94%       |
| 2010 and Earlier                | 6 | 4,104 Immersion      | 0.26 (0.08 – 0.83) | 89 (<.01) |
|                                 |   | 6,889 Standard Care  | Random Effects     | 94%       |
| <b>Pain</b>                     |   |                      |                    |           |



|                          |    |                      |                    |            |
|--------------------------|----|----------------------|--------------------|------------|
| 2010 and Earlier         | 3  | 182 Immersion        | 0.53 (0.27 – 1.03) | 6 (.05)    |
|                          |    | 188 Standard Care    | Random Effects     | 68%        |
| 2011 and Later           | 5  | 417 Immersion        | 0.15 (0.06 – 0.42) | 48 (<.01)  |
|                          |    | 413 Standard Care    | Random Effects     | 92%        |
| <b>Cesarean Delivery</b> |    |                      |                    |            |
| 2010 and Earlier         | 4  | 790 Immersion        | 1.05 (0.63 – 1.74) | 3 (.43 )   |
|                          |    | 745 Standard Care    | Fixed Effects      | 0%         |
| 2011 and Later           | 4  | 400 Immersion        | 0.84 (0.32 – 2.23) | 6 (.12)    |
|                          |    | 830 Standard Care    | Fixed Effects      | 48%        |
| <b>Shoulder Dystocia</b> |    |                      |                    |            |
| Obstetric Units          | 6  | 5,528 Immersion      | 1.06 (0.64 – 1.74) | 4 (.60)    |
|                          |    | 21,155 Standard Care | Fixed Effects      | 0%         |
| 2010 and Earlier         | 3  | 4,007 Immersion      | 0.88 (0.42 – 1.83) | 2 (.39 )   |
|                          |    | 6,335 Standard Care  | Fixed Effects      | 0%         |
| 2011 and Later           | 4  | 11,773 Immersion     | 0.87 (0.33 – 2.26) | 11 (.01)   |
|                          |    | 31,252 Standard Care | Random Effects     | 73%        |
| <b>Intact Perineum</b>   |    |                      |                    |            |
| Obstetric Units          | 14 | 6,170 Immersion      | 1.55 (1.12 – 2.16) | 147 (<.01) |
|                          |    | 8,866 Standard care  | Random Effects     | 91%        |
| Midwifery-led Units      | 3  | 17,079 Immersion     | 1.07 (0.91 – 1.26) | 15 (<.01)  |
|                          |    | 23,249 Standard care | Random Effects     | 87%        |
| Nulliparas               | 5  | 1,065 Immersion      | 1.59 (1.01 – 2.50) | 12 (.01)   |
|                          |    | 894 Standard care    | Random Effects     | 68%        |
| Waterbirth vs No Water   | 8  | 954 Immersion        | 1.35 (0.67 – 2.72) | 83 (<.01)  |
|                          |    | 1696 Standard care   | Random Effects     | 92%        |

|                  |    |                      |                    |            |
|------------------|----|----------------------|--------------------|------------|
| 2010 and Earlier | 7  | 4,958 Immersion      | 1.28 (0.90 – 1.82) | 39 (<.01)  |
|                  |    | 6,949 Standard Care  | Random Effects     | 85%        |
| 2011 and Later   | 10 | 18,292 Immersion     | 1.59 (1.22 – 2.07) | 156 (<.01) |
|                  |    | 28,871 Standard Care | Random Effects     | 94%        |

---

**OASI**

|                        |    |                      |                    |            |
|------------------------|----|----------------------|--------------------|------------|
| Obstetric Units        | 13 | 10,720 Immersion     | 0.85 (0.57 – 1.30) | 51 (<.001) |
|                        |    | 57,870 Standard care | Random Effects     | 77%        |
| Midwifery-led Units    | 2  | 6,827 Immersion      | 0.71 (0.47 – 1.08) | 0 (.527)   |
|                        |    | 10,558 Standard care | Fixed Effects      | 0%         |
| Nulliparas             | 2  | 870 Immersion        | 1.25 (0.42 – 3.71) | 1 (.385)   |
|                        |    | 540 Standard care    | Fixed Effects      | 0%         |
| Waterbirth vs No Water | 3  | 408 Immersion        | 0.57 (0.19 – 1.69) | 1 (.681)   |
|                        |    | 550 Standard care    | Fixed Effects      | 0%         |
| 2010 and Earlier       | 6  | 5,493 Immersion      | 0.73 (0.58 – 0.91) | 8 (.16)    |
|                        |    | 7,517 Standard Care  | Fixed Effects      | 37%        |
| 2011 and Later         | 9  | 13,298 Immersion     | 0.78 (0.48 – 1.28) | 42 (<.01)  |
|                        |    | 67,382 Standard Care | Random Effects     | 81%        |

---

**Episiotomy<sup>a</sup>**

|                        |    |                      |                    |             |
|------------------------|----|----------------------|--------------------|-------------|
| Obstetric Units        | 14 | 6177 Immersion       | 0.17 (0.11 – 0.28) | 109 (<.001) |
|                        |    | 13,548 Standard care | Random Effects     | 88%         |
| Nulliparas             | 3  | 886 Immersion        | 0.10 (0.02 – 0.60) | 14 (<.001)  |
|                        |    | 582 Standard care    | Random Effects     | 86%         |
| Waterbirth vs No Water | 5  | 691 Immersion        | 0.63 (0.02 – 0.20) | 14 (.008)   |
|                        |    | 1022 Standard care   | Random Effects     | 71%         |
| 2010 and Earlier       | 7  | 4,927 Immersion      | 0.21 (0.11 – 0.41) | 52 (<.01)   |

|                                   |                        |    |                      |                    |            |
|-----------------------------------|------------------------|----|----------------------|--------------------|------------|
|                                   |                        |    | 6,912 Standard Care  | Random Effects     | 88%        |
|                                   | 2011 and Later         | 8  | 7,831 Immersion      | 0.09 (0.03 – 0.25) | 53 (<.01)  |
|                                   |                        |    | 16,888 Standard Care | Random Effects     | 87%        |
| <hr/>                             |                        |    |                      |                    |            |
| <b>Postpartum Hemorrhage</b>      |                        |    |                      |                    |            |
|                                   | Obstetric Units        | 13 | 7,040 Immersion      | 0.75 (0.60 – 0.94) | 30 (.002)  |
|                                   |                        |    | 29,555 Standard care | Random Effects     | 60%        |
|                                   | Midwifery-led Units    | 2  | 10,558 Immersion     | 0.39 (0.08 – 1.86) | 56 (<.001) |
|                                   |                        |    | 16,738 Standard care | Random Effects     | 98%        |
|                                   | Waterbirth vs No Water | 5  | 758 Immersion        | 1.02 (0.76 – 1.36) | 4 (.439)   |
|                                   |                        |    | 1,177 Standard care  | Fixed Effects      | 0%         |
|                                   | 2010 and Earlier       | 3  | 4,007 Immersion      | 0.72 (0.59 – 0.88) | 2 (.30)    |
|                                   |                        |    | 6,348 Standard Care  | Random Effects     | 17%        |
|                                   | 2011 and Later         | 12 | 13,591 Immersion     | 0.76 (0.48 – 1.20) | 97 (<.01)  |
|                                   |                        |    | 39,945 Standard Care | Random Effects     | 89%        |
| <hr/>                             |                        |    |                      |                    |            |
| <b>Manual Removal of Placenta</b> |                        |    |                      |                    |            |
|                                   | Obstetric Units        | 4  | 1,239 Immersion      | 0.78 (0.37 – 1.64) | 6 (.105)   |
|                                   |                        |    | 1,654 Standard care  | Fixed Effects      | 51%        |
|                                   | 2010 and Earlier       | 2  | 701 Immersion        | 0.48 (0.21 – 1.11) | 0 (.91)    |
|                                   |                        |    | 771 Standard Care    | Fixed Effects      | 0%         |
|                                   | 2011 and Later         | 3  | 538 Immersion        | 1.48 (0.50 – 4.38) | 4 (.16)    |
|                                   |                        |    | 883 Standard Care    | Fixed Effects      | 45%        |
| <hr/>                             |                        |    |                      |                    |            |
| <b>Maternal Satisfaction</b>      |                        |    |                      |                    |            |
|                                   | Obstetric Units        | 5  | 1,802 Immersion      | 2.02 (1.28 – 3.19) | 24 (<.01)  |
|                                   |                        |    | 1,568 Standard care  | Random Effects     | 83%        |
|                                   | 2010 and Earlier       | 4  | 1,815 Immersion      | 1.64 (0.83 – 3.24) | 22 (<.01)  |

|                        |    |                      |                     |             |
|------------------------|----|----------------------|---------------------|-------------|
|                        |    | 1,519 Standard Care  | Random Effects      | 86%         |
| 2011 and Later         | 2  | 372 Immersion        | 2.55 (1.54 – 4.23)  | 2 (.16)     |
|                        |    | 438 Standard Care    | Random Effects      | 50%         |
| <b>APGAR</b>           |    |                      |                     |             |
| Obstetric Units        | 18 | 10,286 Immersion     | 0.85 (0.66 – 1.08)  | 29 (.047)   |
|                        |    | 54,361 Standard care | Random Effects      | 38%         |
| Midwifery-led Units    | 3  | 17,092 Immersion     | 0.33 (0.07 – 1.54)  | 57 (<.001)  |
|                        |    | 18,31 Standard care  | Random Effects      | 96%         |
| Waterbirth vs No Water | 6  | 614 Immersion        | 1.07 (0.76 – 1.51)  | 3 (.643)    |
|                        |    | 655 Standard care    | Fixed Effects       | 0%          |
| 2010 and Earlier       | 8  | 4,184 Immersion      | 1.00 (0.77 – 1.29)  | 7 (.120)    |
|                        |    | 6,476 Standard care  | Fixed Effects       | 39%         |
| 2011 and Later         | 12 | 21,931 Immersion     | 0.52 (0.25 – 1.05)  | 101 (<.001) |
|                        |    | 65,781 Standard care | Random Effects      | 89%         |
| <b>Neonatal Death</b>  |    |                      |                     |             |
| Midwifery-led units    | 2  | 16,786 Immersion     | 0.91 (0.61 – 1.34)  | 1 (.297)    |
|                        |    | 26,722 Standard care | Fixed Effects       | 8%          |
| <b>Cord Avulsion</b>   |    |                      |                     |             |
| Obstetric Units        | 3  | 1,874 Immersion      | 2.18 (0.34 – 11.97) | 1 (.757)    |
|                        |    | 21,621 Standard care | Fixed Effects       | 0%          |
| Midwifery-led Units    | 2  | 10,649 Immersion     | 1.92 (1.28 – 2.89)  | 1 (.386)    |
|                        |    | 16,829 Standard care | Fixed Effects       | 0%          |

a. Random Effects models were used for intervention (labor induction, amniotomy, augmentation, epidural, and episiotomy) models because variation in use of these procedures is dependent on practice habits of the provider which are not otherwise controlled.

1  
2  
3 **Amniotomy.** Five studies provided data on amniotomy (n=1,627). Overall, this analysis found no  
4 difference (OR 0.71 ; 95% CI 0.37 – 1.39; random effects; Q=23.9 p<.001; I<sup>2</sup>=83%). Cumulative meta-  
5 analysis indicated the available evidence has consistently indicated no difference in the rate of  
6 amniotomy. Subgroup analysis of studies reporting in an obstetric setting and the most recent studies  
7 remained no difference.  
8  
9

10  
11  
12  
13 [Insert Figure 4]  
14

15 **Augmentation.** Three studies provided data to compare augmentation of labour (n=1,420). This  
16 analysis favoured water immersion (OR 0.30; 95% CI 0.10 – 0.92; random effects; Q=19.2 p<.001;  
17 I<sup>2</sup>=90%). Subgroup analysis of studies reporting in an obstetric setting and the most recent studies  
18 remained no difference. Fail-safe analysis estimated 34 additional studies finding no difference would be  
19 needed to change the estimate to no difference. Three studies were too few for cumulative meta-analysis.  
20  
21

22  
23  
24  
25 [Insert Figure 5]  
26

27 **Fetal Monitoring.** No studies provided data to compare the use of intermittent or continuous  
28 fetal monitoring during immersion to standard care.  
29  
30

31 **Opioid Use.** Eight studies provided data on opioid use (n=27,391), all were conducted in an  
32 obstetric setting. Overall, this analysis found reduced use of opioids with water immersion (OR 0.22 95%  
33 CI 0.13 – 0.38; random effects; Q=96.1 p<.001; I<sup>2</sup>=93%). Subgroup analysis of the most recent studies  
34 remained no difference. Cumulative meta-analysis indicated the available evidence consistently favoured  
35 water immersion. Fail-safe analysis estimated 972 additional studies would be needed to change the  
36 estimate to no difference.  
37  
38  
39  
40  
41  
42  
43

44  
45 [Insert Figure 6]  
46

47 **Epidural use.** Seven studies provided data on epidural use (n=10,993). Overall, this analysis  
48 favoured water immersion (OR 0.26 95% CI 0.08 – 0.83; random effects; Q=89.5 p<.001; I<sup>2</sup>=94%).  
49 Cumulative meta-analysis revealed the estimate moved from no difference to favour water immersion in  
50 2007. Fail-safe analysis indicated 100 additional studies would be needed to change the estimate to no  
51  
52  
53  
54  
55  
56  
57  
58  
59  
60

1  
2  
3 difference. Subgroup analysis revealed the use of epidural was reduced with water immersion in an  
4  
5 obstetric setting.  
6

7 [Insert Figure 7]

8  
9 **Pain.** Eight studies provided data for analysis of pain (n=1,200), all were conducted in an  
10  
11 obstetric setting. Because these studies varied in their measurement timing and scale, they were combined  
12  
13 with a random effects model for an overall score and the results were stratified by timing of measurement  
14  
15 in the forest plot. Overall, the results indicated reduced pain with water immersion (OR 0.24 95% CI 0.12  
16  
17 – 0.51; random effects; Q=76.7 p<.001; I<sup>2</sup>=91%). One additional study reported in favour of water  
18  
19 immersion but did not provide the data in a way that allowed synthesis.<sup>31</sup> Subgroup analysis of the most  
20  
21 recent studies indicated reduced reports of pain with water immersion. Cumulative meta-analysis  
22  
23 indicated the available evidence moved from no difference to favour water immersion in 2009 and has  
24  
25 been stable since. Fail-safe analysis estimated 279 studies finding no difference would be necessary to  
26  
27 change the estimate from favouring water to no difference.  
28  
29

30 [Insert Figure 8]

31  
32 **Caesarean Birth.** Eight studies provided data on mode of birth comparing water immersion  
33  
34 (n=1190) vs standard care (n=1575), all were conducted in an obstetric setting. The meta-analysis  
35  
36 indicated no difference between water immersion and standard care for caesarean birth (OR 0.92 95% CI  
37  
38 0.58 – 1.48; fixed effects; Q=9.0 p=.249; I<sup>2</sup>=23%). Subgroup analysis of studies reporting by year of  
39  
40 publication remained no difference. Cumulative meta-analysis indicated this result has been stable at no  
41  
42 difference since the first time the outcome was reported in 2001.  
43  
44

45 [Insert Figure 9]

46  
47 **Shoulder Dystocia.** Seven studies provided data that could be synthesised for shoulder dystocia  
48  
49 (n=53,367). One additional study reported zero events in the sample and could not be included in the  
50  
51 synthesis. There was no difference between water immersion and standard care (OR 0.88 95% CI 0.46 –  
52  
53 1.69; random effects; Q=16 p=.012; I<sup>2</sup>=63%). The subgroup analysis of studies in an obstetric setting and  
54  
55  
56  
57

1  
2  
3 the most recent studies remained no difference. Cumulative meta-analysis indicated there has consistently  
4  
5 been no difference.  
6

7 [Insert Figure 10]  
8

9 **Intact Perineum.** Seventeen studies provided data on intact perineum (n=59,070). This analysis  
10 favoured water immersion (OR 1.47; 95% CI 1.21 – 1.78; random effects; Q=219.1 p<.001; I<sup>2</sup>=93%).  
11 Note the direction of effect for Figure 11 reflects that intact perineum is a positive outcome. Subgroup  
12 analysis revealed no difference in odds of intact perineum in midwifery-led settings, in studies that  
13 compare waterbirth to no immersion. Subgroup analysis revealed higher odds of intact perineum with  
14 water immersion in an obstetric setting and in the most recent studies. Cumulative meta-analysis indicated  
15 the available evidence has consistently indicated no difference or favoured water immersion, with  
16 evidence stable at favouring water immersion since 2016. Fail-safe analysis estimated 358 additional  
17 studies finding no difference would be necessary to change the estimate from favouring water to no  
18 difference. Subgroup analysis revealed no difference in odds of intact perineum in midwifery-led settings  
19 and in favour of water immersion in an obstetric setting.  
20  
21  
22  
23  
24  
25  
26  
27  
28  
29  
30  
31

32 Meta-regression identified the episiotomy rate (p<.001) and the proportion of nulliparas in the  
33 sample (p=.001) accounted for the variation in odds of an intact perineum (R<sup>2</sup>=1.00). Though only six  
34 studies provided the necessary data to test this association, the statistically significant result indicated the  
35 analysis was adequately powered to find this association. After accounting for these variables, the result  
36 was in favour of water immersion (OR 3.03 95% CI 1.52 – 6.04; random effects; Q=2 p=.504 I<sup>2</sup>=0%).  
37  
38  
39  
40  
41  
42

43 [Insert Figure 11]  
44

45 **OASI.** Fifteen studies provided data on obstetric anal sphincter injuries (n=93,690). This analysis  
46 found no difference (OR 0.84 95% CI 0.59 – 1.18; random effects; Q=52.6 p<.001; I<sup>2</sup>=73%). Cumulative  
47 meta-analysis indicated the estimate has moved between no difference and favouring water, with the most  
48 recent change to no difference occurring in 2019. Analysis of subgroups by setting favoured water  
49 immersion in obstetric settings (OR 0.71 95% CI 0.50 – 0.99; random effects; Q=16 p=.011; I<sup>2</sup>=37%).  
50  
51  
52  
53  
54  
55  
56  
57

1  
2  
3 Meta-regression of the studies with the a priori selected control variables was not able to reduce the  
4  
5 heterogeneity.  
6

7 [Insert Figure 12]  
8

9 **Episiotomy.** Fifteen studies provided data on use of episiotomy (n=36,558). This analysis found  
10 reduced use of episiotomy with water immersion (OR 0.16; 95% CI 0.10 – 0.26; random effects; Q=114.3  
11 p<.001; I<sup>2</sup>=88%). Subgroup analysis revealed a reduction with water immersion in an obstetric setting, for  
12 nulliparas, and in the most recent studies. Cumulative meta-analysis indicated the available evidence has  
13 consistently favoured water immersion. Fail-safe analysis estimated 1525 additional studies finding no  
14 difference would be necessary to change the estimate from favouring water to no difference.  
15  
16  
17  
18  
19  
20  
21

22 Meta-regression of the studies in an obstetric setting indicated the proportion of primiparas in the  
23 sample accounted for some of the variance (R<sup>2</sup>=.76; p=.001; 7 studies). Though this analysis was limited  
24 to seven studies, the finding of an association indicates the analysis had adequate power to identify the  
25 association. After accounting for the variation in proportion of primiparas, the result remained in favour  
26 of water immersion (OR 0.04 95% CI 0.01 – 0.13; random effects; Q=12 p=.038; I<sup>2</sup>=57%).  
27  
28  
29  
30  
31  
32

33 [Insert Figure 13]  
34

35 **Third Stage Management.** No studies provided comparison data for third stage management.  
36

37 **Postpartum Hemorrhage.** Fifteen studies provided data about postpartum hemorrhage  
38 (n=63,891) using three different measures: count of postpartum hemorrhage defined as >500 ml blood  
39 loss, mean estimated blood loss, and change in hemoglobin. Overall, this analysis favoured water  
40 immersion (OR 0.69 95% CI 0.51 – 0.95; random effects; Q=116.5 p<.001; I<sup>2</sup>=88%). Subgroup analysis  
41 revealed no difference in odds of postpartum hemorrhage in midwife-led settings, in studies comparing  
42 waterbirth to no water use, and the most recent studies. Subgroup analysis revealed a reduction with water  
43 immersion in an obstetric setting. Cumulative meta-analysis of the random effects model found the  
44 available evidence has consistently indicated no difference. Fail-safe analysis estimated 198 additional  
45 studies finding no difference would be necessary to change the estimate from favouring water to no  
46 difference.  
47  
48  
49  
50  
51  
52  
53  
54  
55  
56  
57

58 33  
59  
60





1  
2  
3 **5-Minute APGAR.** Twenty-one studies provided data for 5-minute APGAR (n=98,372). This  
4 analysis found no difference (OR 0.63 95% CI 0.38 – 1.05; random effects; Q=146.5 p<.001; I<sup>2</sup>=87%).  
5  
6 Three additional studies reported on 5-minute APGAR but did not provide data in a usable format; two  
7 found no difference and one reported in favor of water immersion. Analysis of subgroups found  
8  
9 consistent results of no difference. Cumulative meta-analysis indicated the available evidence has  
10  
11 consistently demonstrated no difference.  
12  
13  
14

15  
16 Meta-regression indicated that study setting accounted for some between-study variance (R<sup>2</sup>=.85;  
17 p=.001; 9 studies). After accounting for setting the analysis favoured water immersion (OR 0.14 95% CI  
18 0.06 – 0.36; random effects; Q=20 p=.034; I<sup>2</sup>=50%).  
19  
20  
21

22 [Insert Figure 18]  
23

24 **Newborn Resuscitation.** Five studies provided data on newborn resuscitation (n=51,028), all  
25 were conducted in an obstetric setting. This analysis found no difference (OR 0.91; 95% CI 0.49 – 1.69;  
26 random effects; Q=9.6 p=.048; I<sup>2</sup>=58%. Cumulative meta-analysis indicated this outcome has been stable  
27 at no difference since first reported.  
28  
29  
30  
31

32 [Insert Figure 19]  
33  
34

35 **Transient tachypnea of the newborn.** Two studies provided data on transient tachypnea of the  
36 newborn (n=1,473), both were conducted in an obstetric setting. This analysis found no difference (OR  
37 0.74; 95% CI 0.33-1.65; fixed effects; Q=0.8 p=.364; I<sup>2</sup>=0%). Too few studies were available to conduct  
38 cumulative meta-analysis and subgroup analysis.  
39  
40  
41  
42

43 [Insert Figure 20]  
44

45 **Respiratory distress of the newborn.** Three studies provided data on respiratory distress of the  
46 newborn (n=32,707), all were conducted in an obstetric setting. This analysis indicated no difference (OR  
47 0.34; 95% CI 0.05 – 2.43; random effects; Q=18.1 p<.001; I<sup>2</sup>=89%). Three studies were too few for  
48 cumulative meta-analysis.  
49  
50  
51  
52

53 [Insert Figure 21]  
54  
55

56 **Neonatal intensive care unit admission.** No studies met the definition for NICU admission.  
57

58 35  
59  
60

1  
2  
3 **Neonatal death.** Three studies provided data on neonatal death (n=66,544), all were published  
4 after 2010. This analysis indicated no difference (OR 0.94; 95% CI 0.63 – 1.40; fixed effects; Q=1.9  
5 p=.381; I<sup>2</sup>=0%). Subgroup analysis by setting revealed no difference in midwifery-led settings. Three  
6 studies were too few for cumulative meta-analysis.  
7  
8  
9

10  
11 [Insert Figure 22]  
12

13 **Infection in newborn period.** Only one study met the definition for reporting newborn infection;  
14 it reported no difference.  
15

16 **Cord Avulsion.** Five studies provided data on cord avulsion (n=50,791), all were published after  
17 2010. This analysis favoured standard care (OR 1.94 95% CI 1.30 – 2.88; fixed effects; Q=1.3 p=.856;  
18 I<sup>2</sup>=0%). One study was responsible for 92.7% of the weight of this analysis, when that study was removed  
19 the result became no difference (OR 2.92 95% CI 0.67 – 12.77). Subgroup analysis by setting found no  
20 difference in an obstetric setting, but increased odds of cord avulsion in midwifery-led settings.  
21  
22 Cumulative meta-analysis indicated the estimate moved from no difference to favour standard care in  
23 2019. Fail-safe analysis estimated 5 additional studies would be needed to change the estimate to no  
24 difference.  
25  
26  
27  
28  
29  
30  
31  
32  
33

34 [Insert Figure 23]  
35

36 **Breastfeeding Initiation.** Two studies provided data on breastfeeding initiation (n=692). This  
37 analysis found no difference (OR 1.00 95% CI 0.73 – 1.37; fixed effects; Q=1.0 p=.325; I<sup>2</sup>=0%). Note the  
38 direction of effect for Figure 24 reflects that breastfeeding initiation is a positive outcome. Two studies  
39 were too few for cumulative meta-analysis and subgroup analysis.  
40  
41  
42  
43  
44

45 [Insert Figure 24]  
46

#### 47 *Risk of bias across studies*

48  
49 Risk of bias analysis results are available in Table 5. Begg's Test has moderate power with 25  
50 studies, so is underpowered to find publication bias for this review. Egger's Regression identified risk for  
51 publication bias in three outcomes: epidural, intact perineum, and shoulder dystocia. In each case, trim &  
52 fill estimates of the magnitude of bias indicate the magnitude was too small to affect the results.  
53  
54  
55  
56  
57

Table 5: Analysis of risk of bias across studies comparing water immersion for labour and waterbirth to standard care.

| Outcome         | k  | Begg's Test                                     |                                              | Trim & Fill<br>Direction of Bias <sup>a</sup><br>OR (95% CI) |
|-----------------|----|-------------------------------------------------|----------------------------------------------|--------------------------------------------------------------|
|                 |    | Rank<br>Correlation<br>S-statistic ( <i>p</i> ) | Egger's Regression<br>Intercept ( <i>p</i> ) |                                                              |
| Amniotomy       | 5  | 4 (.164)                                        | 5.04 (.129)                                  | Standard Care<br>0.43 (0.34 – 0.53)                          |
| Induction       | 3  | -3 (0.059)                                      | -10 (.238)                                   | --                                                           |
| Augmentation    | 3  | 3 (0.59)                                        | 28.96 (.057)                                 | Standard Care<br>0.12 (0.09 – 0.16)                          |
| Opioid          | 8  | -2 (.402)                                       | 2.13 (.197)                                  | Standard Care<br>0.17 (0.15 – 0.19)                          |
| Epidural        | 7  | -9 (.088)                                       | -4.51 (.039)                                 | Immersion<br>0.67 (0.54 – 0.83)                              |
| Cesarean        | 8  | -2 (.402)                                       | -0.74 (.327)                                 | --                                                           |
| Pain            | 8  | 0 (.500)                                        | -1.67 (.339)                                 | Standard Care<br>0.16 (0.07 – 0.37)                          |
| Satisfaction    | 6  | -5 (.174)                                       | -1.26 (.216)                                 | Immersion<br>1.73 (1.13 – 2.64)                              |
| Intact Perineum | 14 | -10 (.340)                                      | 2.13 (.045)                                  | Standard Care<br>1.71 (1.40 – 2.10)                          |
| Episiotomy      | 13 | -11 (.274)                                      | -1.27 (.121)                                 | Immersion<br>0.20 (0.13 – 0.32)                              |
| OASI            | 14 | 3 (.435)                                        | 0.40 (.234)                                  | Standard Care                                                |

|  |                          |    |            |              |                    |
|--|--------------------------|----|------------|--------------|--------------------|
|  |                          |    |            |              | 0.64 (0.50 – 0.82) |
|  | Shoulder Dystocia        | 7  | 5 (.226)   | 1.85 (.001)  | Standard Care      |
|  |                          |    |            |              | 0.68 (0.38 – 1.21) |
|  | Maternal Infection       | 3  | --         | 0.34 (.290)  | --                 |
|  | Postpartum Hemorrhage    | 13 | 9 (.328)   | -0.23 (.412) | Standard Care      |
|  |                          |    |            |              | 0.52 (0.39 – 0.71) |
|  | Retained Placenta        | 5  | 6 (.071)   | 2.11 (.068)  | Standard Care      |
|  |                          |    |            |              | 0.76 (0.29 – 2.03) |
|  | APGAR                    | 16 | -34 (.179) | 0.86 (.209)  | Standard Care      |
|  |                          |    |            |              | 0.59 (0.36 – 0.96) |
|  | Neonatal Resuscitation   | 5  | 2 (.312)   | 0.69 (.282)  | --                 |
|  | Transient Tachypnea      | 2  | --         | --           | --                 |
|  | Respiratory Distress     | 3  | 1 (.301)   | -1.77 (.426) | --                 |
|  | Neonatal Death           | 3  | 1 (.301)   | 1.34 (.078)  | Standard Care      |
|  |                          |    |            |              | 0.84 (0.53 – 1.33) |
|  | Cord Avulsion            | 5  | 6 (.071)   | 0.36 (.182)  | Standard Care      |
|  |                          |    |            |              | 1.86 (1.26 – 2.75) |
|  | Breastfeeding Initiation | 2  | --         | --           | --                 |

- a. Trim & Fill analysis conducted with random effects model and indicates OR and 95% Confidence Interval estimate if bias were corrected.

#### *Certainty of Estimates*

Fail-safe N was calculated for the 8 outcomes that favored either water immersion or standard care. For the outcomes that favored water immersion, the minimum number of studies needed to change the estimate was 100. For the outcome that favored standard care, cord avulsion, five additional studies would be needed. The assessment of certainty of estimates using the GRADE criteria and the fail-safe N are available in Supplement 4.

## Discussion

The main findings of this systematic review and meta-analysis are that labouring and/or giving birth in water has clear benefits to women in the obstetric setting. These findings are interesting because, in general, healthy women are more likely to experience interventions and adverse outcomes in this setting compared to midwifery-led settings and this has been reported for women who labour and/or give birth in water.[9, 31-33] Given that globally, most births take place in the obstetric setting, this review shows that water immersion can significantly increase the likelihood of an intact perineum and reduce episiotomy; an intervention which offers no perineal or fetal benefit, can increase postnatal pain, anxiety and impact negatively on a woman's birth experience.[34, 35] Furthermore, labouring and/or giving birth in water does not increase the likelihood of obstetric anal sphincter injury (OASI), particularly in obstetric settings, which corroborates previous waterbirth research.[36, 37] A significant postpartum haemorrhage (PPH) reduction was another important finding, which is also supported in the literature.[38]

In this study, there was no difference in caesarean birth rate between those who used water and those who did not. Interestingly, the caesarean rate in these studies was 3.6%, with all but two studies reporting a caesarean birth rate of less than 10% for the study participants. Given the low caesarean rates reported by most studies, these results should not be generalised to settings with a caesarean rate higher than 10% for women considered low risk. The study with a caesarean rate of 19% is not generalisable to settings with a low risk caesarean birth rate higher than 10% because it compared the use of water immersion to medical augmentation for women with a stalled labour.[39] One study with a caesarean rate of 26% is generalisable to settings with a higher low risk caesarean birth rate.[40]

Our results for newborns mirror those reported in three substantial newborn specific systematic reviews.[11-13] Additionally, this study improved on prior research, which was limited by variations in definition for reporting newborn infection and NICU admission. The more rigorous definitions used for this study reveals limited reporting of serious complications. Given the lack of association with poor newborn outcomes between this study and prior analyses, it is unlikely that differences in prevalence of serious complications between water immersion and standard care exist.

1  
2  
3 More cord avulsions were reported for waterbirths and may relate to possible undue traction on  
4 the umbilical cord as the newborn is brought up out of the water.[9, 41] The incidence of cord avulsion  
5 was 4.3 per 1,000 births in water compared to 1.3 per 1,000 births with standard care. Interestingly, the  
6 incidence of cord avulsion varied from 0.2 per 1,000 to 11.8 per 1,000 in the five studies that reported this  
7 outcome, suggesting individual practice characteristics are more relevant to the incidence of cord avulsion  
8 than whether the birth occurs in water. A review of case reports of poor newborn outcomes found that  
9 when reported, cord avulsion was easily managed by the midwife with no consequences for the  
10 newborn.[42]

11  
12  
13  
14  
15  
16  
17  
18  
19  
20 Our results show that water immersion has the potential to make a meaningful contribution to the  
21 global agenda toward promoting physiologic birth.[43-47] Labouring and/or giving birth in water can  
22 reduce maternal pain with no increased risk of an adverse event, and without the risk introduced by  
23 epidural and opioids.[48, 49, 50] Differences between birth settings in intact perineum and postpartum  
24 haemorrhage suggest water immersion in an obstetric setting may result in outcomes similar to those  
25 achieved in midwifery-led settings. This interpretation is supported by the results of subgroup analysis of  
26 studies in an obstetric setting that labour induction and episiotomy are reduced with water immersion,  
27 while maternal satisfaction is increased. Given these results, water immersion for labour and waterbirth is  
28 an intervention that can be used to achieve physiologic birth and improve the quality of care in the  
29 obstetric setting.

30  
31  
32  
33  
34  
35  
36  
37  
38  
39  
40  
41 One major issue that hindered the potential of this review was that only four studies were  
42 conducted in midwifery-led settings. None of the included studies described the care model in operation  
43 where the study participants laboured. Healthy women who give birth in a midwifery-led setting are more  
44 likely to experience fewer interventions and adverse outcomes compared with those who give birth in an  
45 obstetric setting, particularly nullipara.[3, 9] There is strong evidence showing that the relational element  
46 of care matters to service users, and continuity of carer/care is linked to fewer interventions and adverse  
47 outcomes when compared to fragmented care models.[51] Birth pool use is most prevalent in midwifery-

1  
2  
3 led settings, but most research on water immersion has been conducted in obstetric settings.[3] Evidence-  
4 based practice of water immersion requires research that reflects the context of care provision.  
5  
6

7 Few studies provided information generally considered to be relevant to the outcomes reported or  
8 controlled for potential confounders. Just over half the studies (k=20, 55%) included some description of  
9 the birth pool(s), resulting in uncertainty about whether all participants could move around and adopt  
10 different positions with ease. Furthermore, studies did not specify the type of fetal monitoring. Since  
11 intermittent auscultation does not inhibit mobility, and continuous electronic fetal monitoring (EFM)  
12 typically does, this could present a confounder. Few studies stratified for parity, even when the outcomes  
13 reported occur at higher rates among nullipara. Only six studies (17%) mentioned inclusion of induction of  
14 labour while five studies included women with a prior caesarean. Only eight studies (22%) provided birth  
15 pool eligibility criteria regarding raised BMI. These studies did not include BMI as a characteristic in their  
16 analysis for interventions or outcomes. The inclusion of women with raised BMI in the study populations  
17 suggest water immersion is not considered to be harmful for women who have raised BMI but are otherwise  
18 healthy. No studies provided data for the management of the third stage of labour to enable examination  
19 for any associations between active or physiological management and postpartum haemorrhage.  
20 Improvements in reporting standards would enable expansion of populations considered appropriate for  
21 water immersion and identify best practice for birth pool use.  
22  
23  
24  
25  
26  
27  
28  
29  
30  
31  
32  
33  
34  
35  
36  
37  
38

### 39 **Strengths and Limitations of this work**

40  
41 This was the first substantial systematic review to attempt to include birth setting as an analytic  
42 variable. A broad search strategy was developed and all review processes were conducted by at least two  
43 reviewers. This study incorporated meta-regression, using covariates identified a priori, to reduce the  
44 effect of sources of heterogeneity. The inclusion of analyses of the stability of the results, cumulative  
45 meta-analysis and fail-safe, add value to the synthesis by identifying which outcomes may be considered  
46 sufficiently researched. The results are further strengthened by use of a trim & fill analysis to identify the  
47 direction of any potential publication bias.  
48  
49  
50  
51  
52  
53  
54  
55  
56  
57  
58  
59  
60



1  
2  
3 This review was limited to studies published during or after 2000 or later because earlier studies  
4 may not be generalisable to current water immersion practices. This review was limited by language; the  
5 search was conducted in English using English-language indices. This analysis was limited to a priori  
6 variables for meta-regression. Additional variables, not tested in this study, may contribute to  
7 heterogeneity. This review did not include grey literature.  
8  
9  
10  
11  
12

### 13 **Clinical Implications**

14  
15 Water immersion provides benefits for the mother and newborn when used in the obstetric  
16 setting, making water immersion a low-tech intervention for improving quality and satisfaction with care.  
17 In addition, water immersion during labour and waterbirth alter clinical practice resulting in less  
18 augmentation, episiotomy, and requirements for pharmacologic analgesia. Water immersion is an  
19 effective method to reduce pain in labour, without increasing risk. Clinicians should be mindful to avoid  
20 putting undue traction on the umbilical cord when bringing the newborn to the surface of the water.  
21  
22  
23  
24  
25  
26  
27

### 28 **Research implications**

29  
30 Water immersion during labour and birth is a low-tech yet complex, nuanced intervention. We  
31 suggest that studies incorporate the following fundamentals to advance the evidence: birth pool  
32 description, clearly described maternal and obstetric characteristics, the birth setting, the care model, and  
33 use of standardised definitions. Studies should report potential confounders such as hands-on or -off the  
34 perineum and third stage management. When appropriate for the outcome, results should be stratified by  
35 maternal parity. The study population should reflect all those now using a birth pool, not just the healthy  
36 women who experience an uncomplicated pregnancy. There is a need for additional research conducted in  
37 midwifery-led settings to establish best practice.  
38  
39  
40  
41  
42  
43  
44  
45  
46

### 47 **Conclusion**

48  
49 Water immersion during labour and birth, while low-tech, is a complex, nuanced intervention. It  
50 has clear benefits for healthy women and their newborns when conducted in an obstetric setting and may  
51 have benefits for populations previously excluded from water immersion. Future research should focus on  
52 facilitating equity of access to water immersion in all birth settings and identification of best practice.  
53  
54  
55  
56  
57

1  
2  
3  
4  
5  
6  
7  
8  
9  
10  
11  
12  
13  
14  
15  
16  
17  
18  
19  
20  
21  
22  
23  
24  
25  
26  
27  
28  
29  
30  
31  
32  
33  
34  
35  
36  
37  
38  
39  
40  
41  
42  
43  
44  
45  
46  
47  
48  
49  
50  
51  
52  
53  
54  
55  
56  
57  
58  
59  
60

For peer review only

**Figures**

Figure 1 PRISMA 2020 flow diagram for new systematic reviews which included searches of databases, registers and other sources

Figure 2 Risk of Bias Assessment

Figure 3 Forest Plot of Synthesis of Labour Induction

Figure 4 Forest Plot of Synthesis of Amniotomy

Figure 5 Forest Plot of Synthesis of Augmentation of Labour

Figure 6 Forest Plot of Synthesis of Opioid Use

Figure 7 Forest Plot of Synthesis of Epidural Use

Figure 8 Forest Plot of Synthesis of Pain

Figure 9 Forest Plot of Synthesis of Cesarean Delivery

Figure 10 Forest Plot of Synthesis of Shoulder Dystocia

Figure 11 Forest Plot of Synthesis of Intact Perineum

Figure 12 Forest Plot of Synthesis of Obstetric Anal Sphincter Injuries (OASI)

Figure 13 Forest Plot of Synthesis of Episiotomy

Figure 14 Forest Plot of Synthesis of Postpartum Hemorrhage

Figure 15 Forest Plot of Synthesis of Manual Removal of the Placenta

Figure 16 Forest Plot of Synthesis for Maternal Infection

Figure 17 Forest Plot of Synthesis of Maternal Satisfaction Measures

Figure 18 Forest Plot of Synthesis of 5-Minute APGAR

Figure 19 Forest Plot of Synthesis of Neonatal Resuscitation

Figure 20 Forest Plot of Synthesis of Transient Tachypnea of the Newborn

Figure 21 Forest plot of Synthesis of Respiratory Distress

Figure 22 Forest Plot of Synthesis of Neonatal Death

Figure 23 Forest Plot of Synthesis of Cord Avulsion

Figure 24 Forest Plot of Synthesis of Breastfeeding Initiation

1

### Included Studies

- 1  
2  
3  
4  
5 Bailey JM, Zielinski RE, Emeis CL, Kane Low L. A retrospective comparison of waterbirth outcomes in  
6 two United States hospital settings. *Birth*. March 2020;47(1):98-104.
- 7  
8 Barry PL, McMahon LE, Banks RA, Fergus AM, Murphy DJ. Prospective cohort study of water  
9 immersion for labour and birth compared with standard care in an Irish maternity setting. *BMJ Open*.  
10 2020;10(12):e038080. Published 2020 Dec 4. doi:10.1136/bmjopen-2020-038080).
- 11  
12 Benfield RD, Hortobágyi T, Tanner CJ, Swanson M, Heitkemper MM, Newton ER. The Effects of  
13 Hydrotherapy on Anxiety, Pain, Neuroendocrine Responses, and Contraction Dynamics During  
14 Labor. *Biological Research for Nursing*. 2010;12(1):28-36.
- 15  
16 Bovbjerg ML, Cheyney M, Everson C. Maternal and Newborn Outcomes Following Waterbirth: The  
17 Midwives Alliance of North America Statistics Project, 2004 to 2009 Cohort. *Journal of Midwifery  
18 and Women's Health*. January 2016;61(1):11-20.
- 19  
20 Cluett ER, Pickering RM, Getliffe K, St George Saunders NJ. Randomised controlled trial of labouring in  
21 water compared with standard of augmentation for management of dystocia in first stage of  
22 labour. *BMJ*. 2004;328(7435):314. doi:10.1136/bmj.37963.606412.EE.
- 23  
24 da Silva FMB, de Oliveira SMJV, Nobre MRC. A randomised controlled trial evaluating the effect of  
25 immersion bath on labour pain. *Midwifery*. June 2009;25(3):286-294.
- 26  
27 Eckert K, Turnbull D, MacLennan A. Immersion in water in the first stage of labor: A randomized  
28 controlled trial. *Birth*. 2001;28(2):84-93.
- 29  
30 Geissbühler V, Eberhard J. Waterbirths: A comparative study - A prospective study on more than 2,000  
31 waterbirths. *Fetal Diagnosis and Therapy*. 2000;15(5):291-300.
- 32  
33 Geissbuehler V, Eberhard J, Lebrecht A. Waterbirth: Water temperature and bathing time - Mother knows  
34 best! *Journal of Perinatal Medicine*. 2002;30(5):371-378.
- 35  
36 Geissbuehler V, Stein S, Eberhard J. Waterbirths compared with landbirths: An observational study of  
37 nine years. *Journal of Perinatal Medicine*. 2004;32(4):308-314.
- 38  
39 Haslinger C, Burkhardt T, Stoiber B, Zimmermann R, Schäffer L. Position at birth as an important factor  
40 for the occurrence of anal sphincter tears: A retrospective cohort study. *Journal of Perinatal  
41 Medicine*. November 2015;43(6):715-720.
- 42  
43 Henderson, J., Burns, E.E., Regalia, A.L. *et al*. Labouring women who used a birthing pool in obstetric  
44 units in Italy: prospective observational study. *BMC Pregnancy Childbirth* **14**, 17 (2014).  
45 <https://doi.org/10.1186/1471-2393-14-17>
- 46  
47 Hodgson ZG, Comfort LR, Albert AAY. Water Birth and Perinatal Outcomes in British Columbia: A  
48 Retrospective Cohort Study. *J Obstet Gynaecol Can*. 2020;42(2):150-155.  
49 doi:10.1016/j.jogc.2019.07.007
- 50  
51  
52  
53  
54  
55  
56  
57  
58  
59  
60

- 1  
2  
3 Jacoby S, Becker G, Crawford S, Wilson RD. Water Birth Maternal and Neonatal Outcomes Among  
4 Midwifery Clients in Alberta, Canada, from 2014 to 2017: A Retrospective Study. *J Obstet Gynaecol*  
5 *Can.* 2019;41(6):805-812. doi:10.1016/j.jogc.2018.12.014  
6  
7  
8 Lathrop A, Bonsack CF, Haas DM. Women's experiences with water birth: A matched groups prospective  
9 study. *Birth.* December 2018;45(4):416-423.  
10  
11 Lim KMX, Tong PSY, Chong YS. A comparative study between the pioneer cohort of waterbirths and  
12 conventional vaginal deliveries in an obstetrician-led unit in Singapore. *Taiwanese Journal of*  
13 *Obstetrics and Gynecology.* June 2016;55(3):363-367.  
14  
15  
16 Liu, Y., Liu, Y., Huang, X. *et al.* A comparison of maternal and neonatal outcomes between water  
17 immersion during labor and conventional labor and delivery. *BMC Pregnancy Childbirth* **14**, 160  
18 (2014). <https://doi.org/10.1186/1471-2393-14-160>  
19  
20  
21 Mallen-Perez L, Roé-Justiniano MT, Colomé Ochoa N, Ferre Colomat A, Palacio M, Terré  
22 Rull C. Use of hydrotherapy during labour: Assessment of pain, use of analgesia and neonatal safety.  
23 *Enfermeria Clinica.* September 2018;28(5):309-315.  
24  
25  
26 Menakaya U, Albayati S, Vella E, Fenwick J, Angstetra D. A retrospective comparison of water birth and  
27 conventional vaginal birth among women deemed to be low risk in a secondary level hospital in  
28 Australia. *Women and Birth.* June 2013;26(2):114-118.  
29  
30  
31 Mollamahmutoglu L, Moraloglu Ö, Özyer Ş, *et al.* The effects of immersion in water on labor, birth and  
32 newborn and comparison with epidural analgesia and conventional vaginal delivery. *Journal of the*  
33 *Turkish German Gynecology Association.* 2012;13(1):45-49.  
34  
35  
36 Neiman E, Austin E, Tan A, Anderson CM, Chipps E. Outcomes of Waterbirth in a US Hospital-Based  
37 Midwifery Practice: A Retrospective Cohort Study of Water Immersion During Labor and Birth.  
38 *Journal of Midwifery and Women's Health.* March 2020;65(2):216-223.  
39  
40  
41 Ohlsson G, Buchhave P, Leandersson U, Nordström L, Rydhström H, Sjölin I. Warm tub bathing during  
42 labor: Maternal and neonatal effects. *Acta Obstetrica et Gynecologica Scandinavica.* January  
43 2001;80(4):311-314.  
44  
45  
46 Otigbah CM, Dhanjal MK, Harmsworth G, Chard T. A retrospective comparison of water births and  
47 conventional vaginal deliveries. *European Journal of Obstetrics and Gynecology and Reproductive*  
48 *Biology.* 2000;91(1):15-20.  
49  
50  
51 Pagano E, De Rota B, Ferrando A, Petrinco M, Merletti F, Gregori D. An economic evaluation of water  
52 birth: The cost-effectiveness of mother well-being. *Journal of Evaluation in Clinical Practice.*  
53 October 2010;16(5):916-919.  
54  
55  
56 Peacock PJ, Zengeya ST, Cochrane L, Sleath M. Neonatal Outcomes Following Delivery in Water:  
57 Evaluation of Safety in a District General Hospital. *Cureus.* February 2018;10(2).  
58  
59  
60

- 1  
2  
3 Preston HL, Alfirevic Z, Fowler GE, Lane S. Does water birth affect the risk of obstetric anal sphincter  
4 injury? Development of a prognostic model. *International Urogynecology Journal*. June  
5 2019;30(6):909-915.  
6  
7  
8 Ros H. Effect, of waterbirths and traditional bedbirths on outcomes for neonates. *Curationis*. 2009;32(2).  
9  
10 Sert UY, Ozel S, Neselioglu S, Erel O, Engin Ustun Y. Water Immersion During the Labour and Effects  
11 on Oxidative Stress. *Fetal and Pediatric Pathology*. May 2020;39(3):185-193.  
12  
13 Snapp C, Stapleton SR, Wright J, Niemczyk NA, Jolles D. The experience of land and water birth within  
14 the american association of birth centers perinatal data registry, 2012-2017. *Journal of Perinatal and*  
15 *Neonatal Nursing*. January 2020;34(1):16-25.  
16  
17 Thoeni A, Zech N, Moroder L, Ploner F. Review of 1600 water births. Does water birth increase the risk  
18 of neonatal infection? *Journal of Maternal-Fetal and Neonatal Medicine*. May 2005;17(5):357-361.  
19  
20 Torkamani 2010. Torkamani SA, Kangani F, Janani F. The effects of delivery in water on duration of  
21 delivery and pain compared with normal delivery. *Pakistan Journal of Medical*  
22 *Sciences*. 2010;26(3):551-5  
23  
24  
25 Ulfsdottir H, Saltvedt S, Georgsson S. Waterbirth in Sweden – a comparative study. *Acta Obstetrica et*  
26 *Gynecologica Scandinavica*. March 2018;97(3):341-348.  
27  
28 Woodward J, Kelly SM. A pilot study for a randomised controlled trial of waterbirth versus land  
29 birth. *BJOG*. 2004;111(6):537-545. doi:10.1111/j.1471-0528.2004.00132.x  
30  
31 Zanetti-Dällenbach R, Lapaire O, Maertens A, Holzgreve W, Hösli I. Water birth, more than a trendy  
32 alternative: A prospective, observational study. *Archives of Gynecology and Obstetrics*. October  
33 2006;274(6):355-365.  
34  
35  
36 Zanetti-Daellenbach RA, Tschudin S, Zhong XY, Holzgreve W, Lapaire O, Hösli I. Maternal and  
37 neonatal infections and obstetrical outcome in water birth. *European Journal of Obstetrics and*  
38 *Gynecology and Reproductive Biology*. 2007;134(1):37-43.  
39  
40  
41 Ziolkowski R, Dabrus D, Czerniawski W, Dudek K, Darmochwal-Kolarz D, Oleszczuk J. An assessment  
42 of water births based on the author's own research *Ginekologia i Poloznictwo*. 2009;14(4):57-65.  
43  
44  
45  
46  
47  
48  
49  
50  
51  
52  
53  
54  
55  
56  
57  
58  
59  
60

## References

1. Benfield RD, Hortobágyi T, Tanner CJ, Swanson M, Heitkemper MM, Newton ER. The Effects of Hydrotherapy on Anxiety, Pain, Neuroendocrine Responses, and Contraction Dynamics During Labor. *Biological Research for Nursing*. 2010;12(1):28-36.
2. Cluett ER, Burns E, Cuthbert A. Immersion in water during labour and birth. *Cochrane Database Syst Rev*. 2018;5(5):CD000111. Published 2018 May 16. doi:10.1002/14651858.CD000111.pub4
3. Brocklehurst P, Hardy P, Hollowell J, et al. Perinatal and maternal outcomes by planned place of birth for healthy women with low risk pregnancies: The Birthplace in England national prospective cohort study. *BMJ* 2011; 343:d7400 <https://doi.org/10.1136/bmj.d7400> (Published 25 November 2011)
4. Prins M, Boxem J, Lucas C, Hutton E. Effect of spontaneous pushing versus Valsalva pushing in the second stage of labour on mother and fetus: a systematic review of randomised trials. *BJOG*. 2011;118(6):662-670. doi:10.1111/j.1471-0528.2011.02910.x
5. Edqvist, M., Blix, E., Hegaard, H.K. *et al.* Perineal injuries and birth positions among 2992 women with a low risk pregnancy who opted for a homebirth. *BMC Pregnancy Childbirth* **16**, 196 (2016). <https://doi.org/10.1186/s12884-016-0990-0>
6. Gupta JK, Sood A, Hofmeyr GJ, Vogel JP. Position in the second stage of labour for women without epidural anaesthesia. *Cochrane Database Syst Rev*. 2017;5(5):CD002006. Published 2017 May 25. doi:10.1002/14651858.CD002006.pub4
7. Aasheim V, Nilsen AB, Lukasse M, Reinar LM. Perineal techniques during the second stage of labour for reducing perineal trauma. *Cochrane Database Syst Rev*. 2011;(12):CD006672. Published 2011 Dec 7. doi:10.1002/14651858.CD006672.pub2
8. Bulchandani S, Watts E, Sucharitha A, Yates D, Ismail KM. Manual perineal support at the time of childbirth: a systematic review and meta-analysis. *BJOG: An International Journal of Obstetrics and Gynaecology*. 2015;122(9):1157-1165.
9. Burns EE, Boulton MG, Cluett E, Cornelius VR, Smith LA. Characteristics, interventions, and outcomes of women who used a birthing pool: a prospective observational study. *Birth*. 2012;39(3):192-202.
10. Begley CM, Gyte GM, Devane D, McGuire W, Weeks A, Biesty LM. Active versus expectant management for women in the third stage of labour. *Cochrane Database Syst Rev*. 2019;2(2):CD007412. Published 2019 Feb 13. doi:10.1002/14651858.CD007412.pub5
11. Davies R, Davis D, Pearce M, Wong N. The effect of waterbirth on neonatal mortality and morbidity: a systematic review and meta-analysis. *JBI Database System Rev Implement Rep*. 2015;13(10):180-231. doi:10.11124/jbisrir-2015-2105

12. Taylor H, Kleine I, Bewley S, Loucaides E, Sutcliffe A. Neonatal outcomes of waterbirth: a systematic review and meta-analysis. *Arch Dis Child Fetal Neonatal Ed.* 2016;101(4):F357-F365. doi:10.1136/archdischild-2015-309600
13. Vanderlaan J, Hall PJ, Lewitt M. Neonatal outcomes with water birth: A systematic review and meta-analysis. *Midwifery.* 2018;59:27-38. doi:10.1016/j.midw.2017.12.023
14. Pagano E, De Rota B, Ferrando A, Petrinco M, Merletti F, Gregori D. An economic evaluation of water birth: the cost-effectiveness of mother well-being. *Journal of Evaluation in Clinical Practice.* 2010;16(5):916-919.
15. Davies MW. Water births and the research required to assess the benefits versus the harms. *Journal of Paediatrics and Child Health.* 2012;48(9):726-729.
16. Bovbjerg ML. Opposition to Waterbirth Is Not Evidence Based. May 2021;30(5):625-627. <https://home.liebertpub.com/jwh>
17. Page MJ, McKenzie JE, Bossuyt PM, et al. The PRISMA 2020 statement: an updated guideline for reporting systematic reviews. *BMJ.* 2021;372:n71. Published 2021 Mar 29. doi:10.1136/bmj.n71
18. Squires JE, Valentine JC, Grimshaw JM. Systematic reviews of complex interventions: framing the review question. *Journal of Clinical Epidemiology.* 2013;66(11):1215-22.
19. JPT H, Green S. Cochrane Handbook for Systematic Reviews of Interventions Version 5.1.0 [updated March 2011]: The Cochrane Collaboration; 2011 <https://handbook-5-1.cochrane.org/>
20. Ouzzani, M., Hammady, H., Fedorowicz, Z. et al. Rayyan—a web and mobile app for systematic reviews. *Syst Rev* 5, 210 (2016). <https://doi.org/10.1186/s13643-016-0384-4>
21. Sterne JA, Hernán MA, Reeves BC, et al. ROBINS-I: a tool for assessing risk of bias in non-randomised studies of interventions. *BMJ.* 2016;355:i4919. Published 2016 Oct 12. doi:10.1136/bmj.i4919
22. Biostat Inc. Comprehensive Meta-Analysis V.3. 2017.
23. Leimu R, Koricheva J. Cumulative meta-analysis: A new tool for detection of temporal trends and publication bias in ecology. *Proceedings of the Royal Society B: Biological Sciences.* September 2004;271(1551):1961-1966.
24. Carson KP, Schriesheim CA, Kinicki AJ. The Usefulness of the "Fail-Safe" Statistic in Meta-Analysis. *Educational and Psychological Measurement.* June 1990;50(2):233-243.
25. The Nordic Cochrane Center TCC. Review Manger (RevMan) 5.4.1 <https://training.cochrane.org/online-learning/core-software-cochrane-reviews/revman>
26. Murad MH, Chu H, Lin L, Wang Z. The effect of publication bias magnitude and direction on the certainty in evidence. *BMJ Evid Based Med.* 2018;23(3):84-86. doi:10.1136/bmjebm-2018-110891



- 1  
2  
3 27. Duval S, Tweedie R. Trim and fill: A simple funnel-plot-based method of testing and adjusting for  
4 publication bias in meta-analysis. *Biometrics*. 2000;56(2):455-463. doi:10.1111/j.0006-  
5 341x.2000.00455.x  
6  
7  
8 28. Baker WL, White CM, Cappelleri JC, Kluger J, Coleman CI; Health Outcomes, Policy, and  
9 Economics (HOPE) Collaborative Group. Understanding heterogeneity in meta-analysis: the role of  
10 meta-regression. *Int J Clin Pract*. 2009;63(10):1426-1434. doi:10.1111/j.1742-1241.2009.02168.x  
11  
12 29. Borenstein M, Hedges LV, Higgins JPT, Rothstein H. *Regression in Meta-Analysis* 2017.  
13  
14 30. Piccininni, M., Konigorski, S., Rohmann, J.L. *et al.* Directed acyclic graphs and causal thinking in  
15 clinical risk prediction modeling. *BMC Med Res Methodol* **20**, 179 (2020).  
16 <https://doi.org/10.1186/s12874-020-01058-z>  
17  
18 31. Koto PS, Fahey J, Meier D, Ledrew M, Loring S. Relative effectiveness and cost-effectiveness of the  
19 midwifery-led care in Nova Scotia, Canada: A retrospective, cohort study. *Midwifery*. 2019;77:144-  
20 154.  
21  
22 32. Alliman J, Stapleton SR, Wright J, Bauer K, Slider K, Jolles D. Strong Start in birth centers: Socio-  
23 demographic characteristics, care processes, and outcomes for mothers and newborns. *Birth*. June  
24 2019;46(2):234-243.  
25  
26 33. Scarf VL, Rossiter C, Vedam S, et al. Maternal and perinatal outcomes by planned place of birth  
27 among women with low-risk pregnancies in high-income countries: A systematic review and meta-  
28 analysis. *Midwifery*. 2018;62:240-255. doi:10.1016/j.midw.2018.03.024  
29  
30 34. He S, Jiang H, Qian X, Garner P. Women's experience of episiotomy: A qualitative study from China.  
31 *BMJ Open*. July 2020;10(7). <https://bmjopen.bmj.com/content/10/7/e033354>  
32  
33 35. Jiang H, Qian X, Carroli G, Garner P. Selective versus routine use of episiotomy for vaginal birth.  
34 *Cochrane Database of Systematic Reviews*. February 2017; Issue 2. Art. No.: CD000081. DOI:  
35 10.1002/14651858.CD000081.pub3. Accessed 13 August 2021  
36  
37 36. Burns E, Price L, Carpenter J, Smith L. Predictors of obstetric anal sphincter injury during waterbirth:  
38 a secondary analysis of a prospective observational study. *International Urogynecology Journal*.  
39 March 2020;31(3):651-656.  
40  
41 37. Dahlen HG, Dowling H, Tracy M, Schmied V, Tracy S. Maternal and perinatal outcomes amongst  
42 low risk women giving birth in water compared to six birth positions on land. A descriptive cross  
43 sectional study in a birth centre over 12 years. *Midwifery*. July 2013;29(7):759-764.  
44  
45 38. Aughey, H., Jardine, J., Moitt, N. *et al.* Waterbirth: a national retrospective cohort study of factors  
46 associated with its use among women in England. *BMC Pregnancy Childbirth* **21**, 256 (2021).  
47 <https://doi.org/10.1186/s12884-021-03724-6>  
48  
49  
50  
51  
52  
53  
54  
55  
56  
57  
58  
59  
60

- 1  
2  
3 39. Cluett ER, Pickering RM, Getliffe K, St George Saunders NJ. Randomised controlled trial of  
4 labouring in water compared with standard of augmentation for management of dystocia in first stage  
5 of labour. *BMJ*. 2004;328(7435):314. doi:10.1136/bmj.37963.606412.EE.  
6  
7  
8 40. Liu, Y., Liu, Y., Huang, X. *et al*. A comparison of maternal and neonatal outcomes between water  
9 immersion during labor and conventional labor and delivery. *BMC Pregnancy Childbirth* **14**, 160  
10 (2014). <https://doi.org/10.1186/1471-2393-14-160>  
11  
12 41. Cro S, Preston J. Cord snapping at waterbirth delivery. *British Journal of Midwifery*. August  
13 2002;10(8):494-497.  
14  
15 42. Vanderlaan J, Hall P. Systematic Review of Case Reports of Poor Neonatal Outcomes With Water  
16 Immersion During Labor and Birth. *Journal of Perinatal & Neonatal Nursing*. October  
17 2020;34(4):311-323.  
18  
19 43. World Health Organization. WHO recommendations: intrapartum care for a positive childbirth  
20 experience 2018. [https://www.who.int/reproductivehealth/publications/intrapartum-care-](https://www.who.int/reproductivehealth/publications/intrapartum-care-guidelines/en/)  
21 [guidelines/en/](https://www.who.int/reproductivehealth/publications/intrapartum-care-guidelines/en/)  
22  
23 44. Prosser, S.J., Barnett, A.G. & Miller, Y.D. Factors promoting or inhibiting normal birth. *BMC*  
24 *Pregnancy Childbirth* **18**, 241 (2018). <https://doi.org/10.1186/s12884-018-1871-5>  
25  
26 45. Supporting Healthy and Normal Physiologic Childbirth: A Consensus Statement by ACNM, MANA,  
27 and NACPM. *J Perinat Educ*. 2013;22(1):14-18. doi:10.1891/1058-1243.22.1.14, MANA, and  
28 NACPM 2013. 1058-1243  
29  
30 46. National Childbirth Trust. Normal birth as a measure of the quality of care 2010.  
31 [https://www.nct.org.uk/sites/default/files/related\\_documents/Normalbirthasameasureofthequalityofcar](https://www.nct.org.uk/sites/default/files/related_documents/NormalbirthasameasureofthequalityofcareV3.pdf)  
32 [eV3.pdf](https://www.nct.org.uk/sites/default/files/related_documents/NormalbirthasameasureofthequalityofcareV3.pdf)  
33  
34 47. International Confederation of Midwives. Keeping Birth Normal 2014.  
35 [https://www.internationalmidwives.org/assets/files/statement-files/2018/04/keeping-birth-normal-](https://www.internationalmidwives.org/assets/files/statement-files/2018/04/keeping-birth-normal-eng.pdf)  
36 [eng.pdf](https://www.internationalmidwives.org/assets/files/statement-files/2018/04/keeping-birth-normal-eng.pdf)  
37  
38 48. Moran VH, Thomson G, Cook J, et al. Qualitative exploration of women's experiences of  
39 intramuscular pethidine or remifentanyl patient-controlled analgesia for labour pain. *BMJ Open*.  
40 December 2019;9(12). <https://bmjopen.bmj.com/content/bmjopen/9/12/e032203.full.pdf>  
41  
42 49. Fleet JA, Jones M, Belan I. The influence of intrapartum opioid use on breastfeeding experience at 6  
43 weeks post partum: A secondary analysis. *Midwifery*. 2017;50:106-109.  
44 doi:10.1016/j.midw.2017.03.024  
45  
46 50. Penuela, I., Isasi-Nebreda, P., Almeida, H. *et al*. Epidural analgesia and its implications in the  
47 maternal health in a low parity community. *BMC Pregnancy Childbirth* **19**, 52 (2019).  
48 <https://doi.org/10.1186/s12884-019-2191-0>  
49  
50  
51  
52  
53  
54  
55  
56  
57

1  
2  
3  
4  
5  
6  
7  
8  
9  
10  
11  
12  
13  
14  
15  
16  
17  
18  
19  
20  
21  
22  
23  
24  
25  
26  
27  
28  
29  
30  
31  
32  
33  
34  
35  
36  
37  
38  
39  
40  
41  
42  
43  
44  
45  
46  
47  
48  
49  
50  
51  
52  
53  
54  
55  
56  
57  
58  
59  
60

51. Sandall J, Soltani H, Gates S, Shennan A, Devane D. Midwife-led continuity models versus other models of care for childbearing women. Cochrane Database of Systematic Reviews 2016, Issue 4. Art. No.: CD004667. DOI: 10.1002/14651858.CD004667.pub5

For peer review only

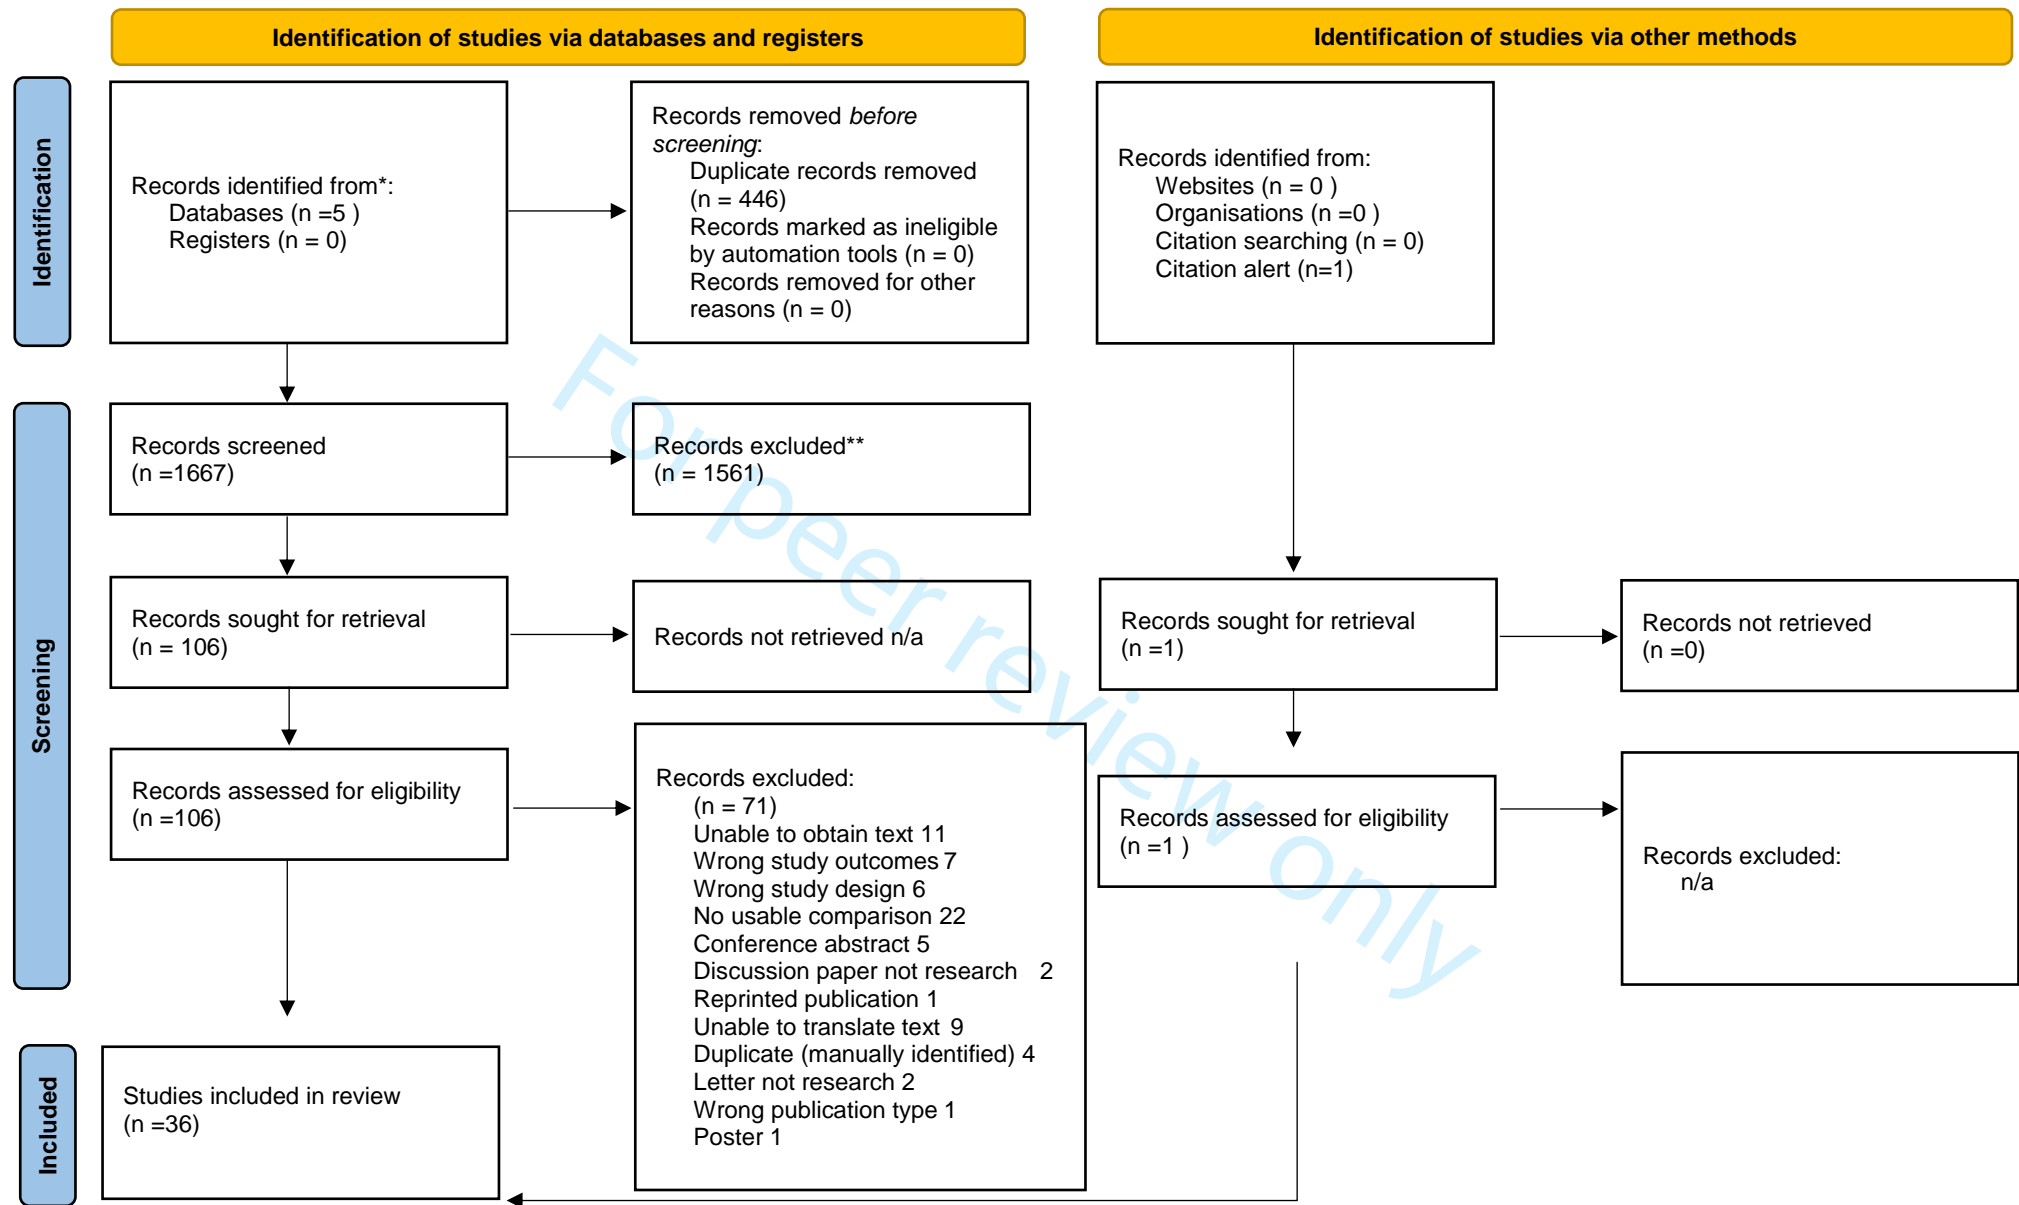

Figure 1 PRISMA 2020 flow diagram for new systematic reviews which included searches of databases, registers and other sources

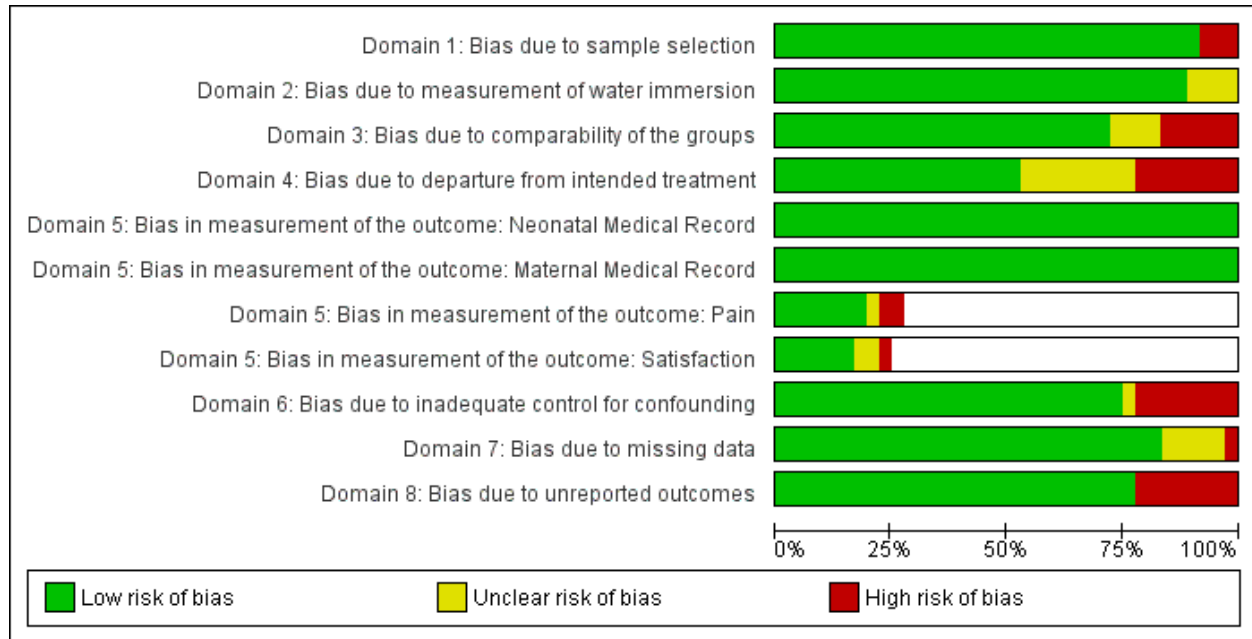

Figure 2 Risk of bias assessment

Figure 3 Forest Plot of Synthesis of Labour Induction

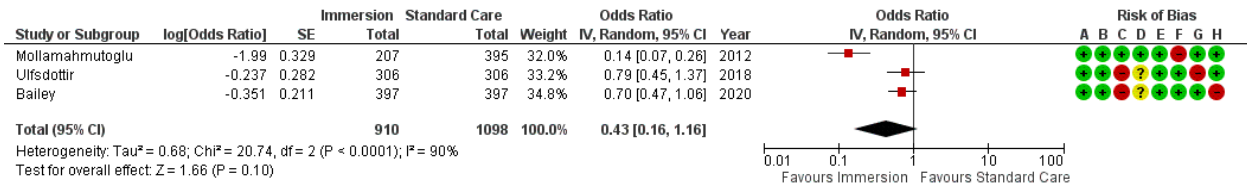

Risk of bias legend

- (A) Domain 1: Bias due to sample selection
- (B) Domain 2: Bias due to measurement of water immersion
- (C) Domain 3: Bias due to comparability of the groups
- (D) Domain 4: Bias due to departure from intended treatment
- (E) Domain 5: Bias in measurement of the outcome: Maternal Medical Record
- (F) Domain 6: Bias due to inadequate control for confounding
- (G) Domain 7: Bias due to missing data
- (H) Domain 8: Bias due to unreported outcomes

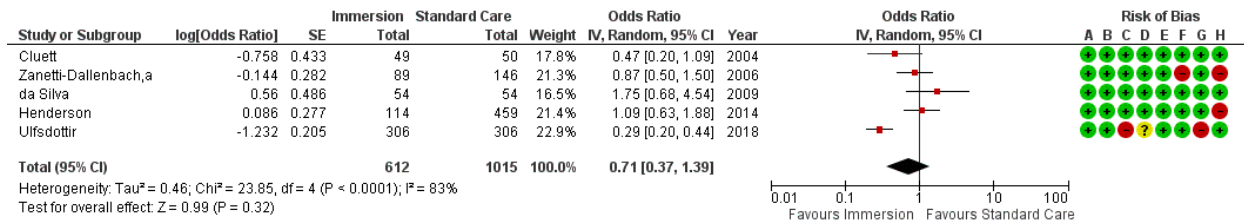

Risk of bias legend  
 (A) Domain 1: Bias due to sample selection  
 (B) Domain 2: Bias due to measurement of water immersion  
 (C) Domain 3: Bias due to comparability of the groups  
 (D) Domain 4: Bias due to departure from intended treatment  
 (E) Domain 5: Bias in measurement of the outcome: Maternal Medical Record  
 (F) Domain 6: Bias due to inadequate control for confounding  
 (G) Domain 7: Bias due to missing data  
 (H) Domain 8: Bias due to unreported outcomes

Figure 4 Forest Plot of Synthesis of Amniotomy

For peer review only

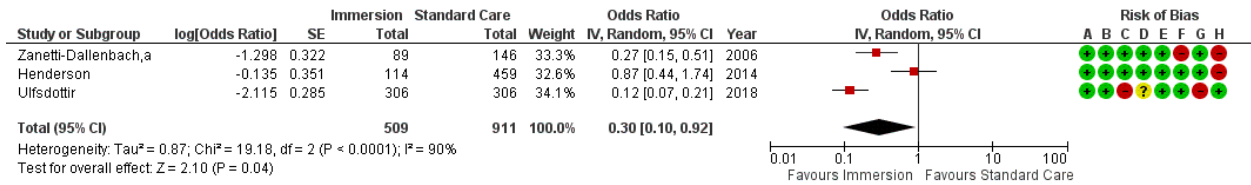

Risk of bias legend

- (A) Domain 1: Bias due to sample selection
- (B) Domain 2: Bias due to measurement of water immersion
- (C) Domain 3: Bias due to comparability of the groups
- (D) Domain 4: Bias due to departure from intended treatment
- (E) Domain 5: Bias in measurement of the outcome: Maternal Medical Record
- (F) Domain 6: Bias due to inadequate control for confounding
- (G) Domain 7: Bias due to missing data
- (H) Domain 8: Bias due to unreported outcomes

Figure 5 Forest Plot of Synthesis of Augmentation of Labour

For peer review only



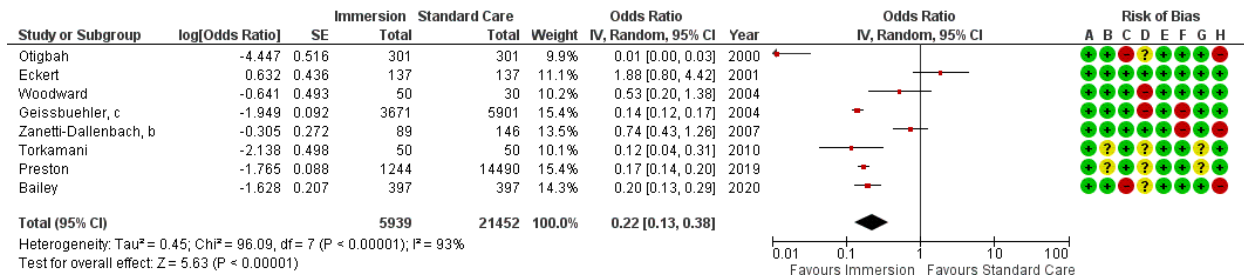

Risk of bias legend  
 (A) Domain 1: Bias due to sample selection  
 (B) Domain 2: Bias due to measurement of water immersion  
 (C) Domain 3: Bias due to comparability of the groups  
 (D) Domain 4: Bias due to departure from intended treatment  
 (E) Domain 5: Bias in measurement of the outcome: Maternal Medical Record  
 (F) Domain 6: Bias due to inadequate control for confounding  
 (G) Domain 7: Bias due to missing data  
 (H) Domain 8: Bias due to unreported outcomes

Figure 6 Forest Plot of Synthesis of Opioid Use

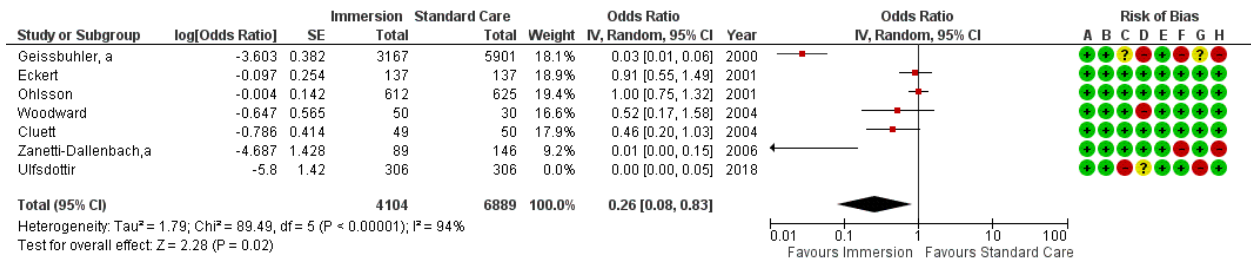

Risk of bias legend

- (A) Domain 1: Bias due to sample selection
- (B) Domain 2: Bias due to measurement of water immersion
- (C) Domain 3: Bias due to comparability of the groups
- (D) Domain 4: Bias due to departure from intended treatment
- (E) Domain 5: Bias in measurement of the outcome: Maternal Medical Record
- (F) Domain 6: Bias due to inadequate control for confounding
- (G) Domain 7: Bias due to missing data
- (H) Domain 8: Bias due to unreported outcomes

Figure 7 Forest Plot of Synthesis of Epidural Use

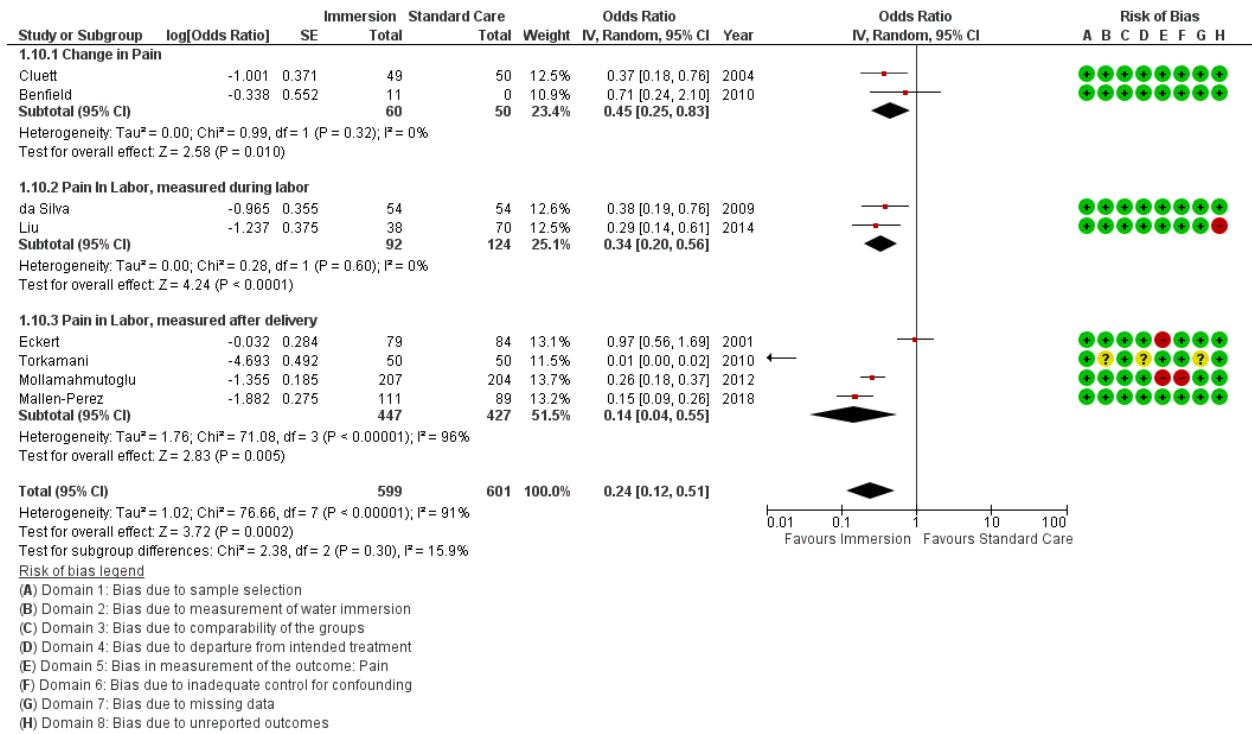

Figure 8 Forest Plot of Synthesis of Pain

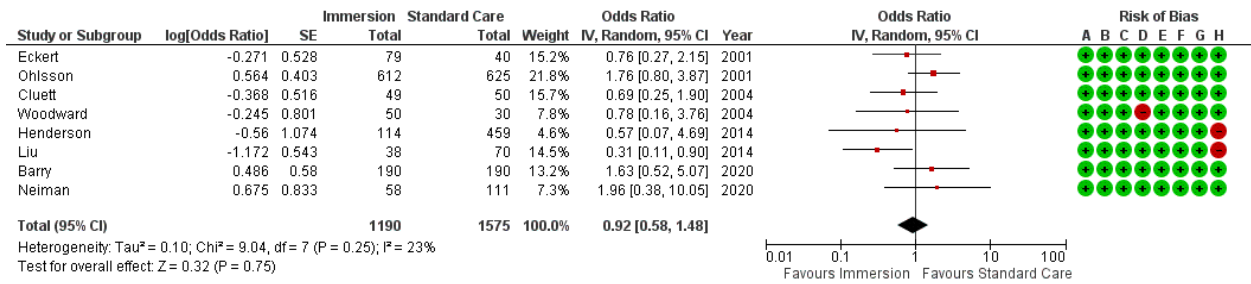

Figure 9 Forest Plot of Synthesis of Cesarean Delivery

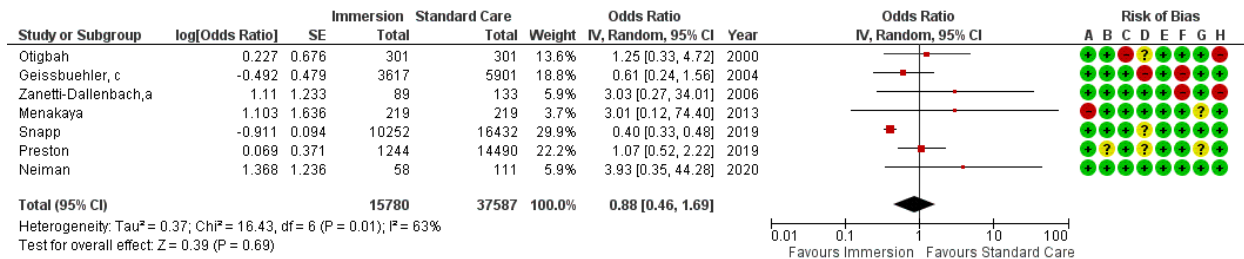

Risk of bias legend

- (A) Domain 1: Bias due to sample selection
- (B) Domain 2: Bias due to measurement of water immersion
- (C) Domain 3: Bias due to comparability of the groups
- (D) Domain 4: Bias due to departure from intended treatment
- (E) Domain 5: Bias in measurement of the outcome: Maternal Medical Record
- (F) Domain 6: Bias due to inadequate control for confounding
- (G) Domain 7: Bias due to missing data
- (H) Domain 8: Bias due to unreported outcomes

Figure 10 Forest Plot of Synthesis of Shoulder Dystocia

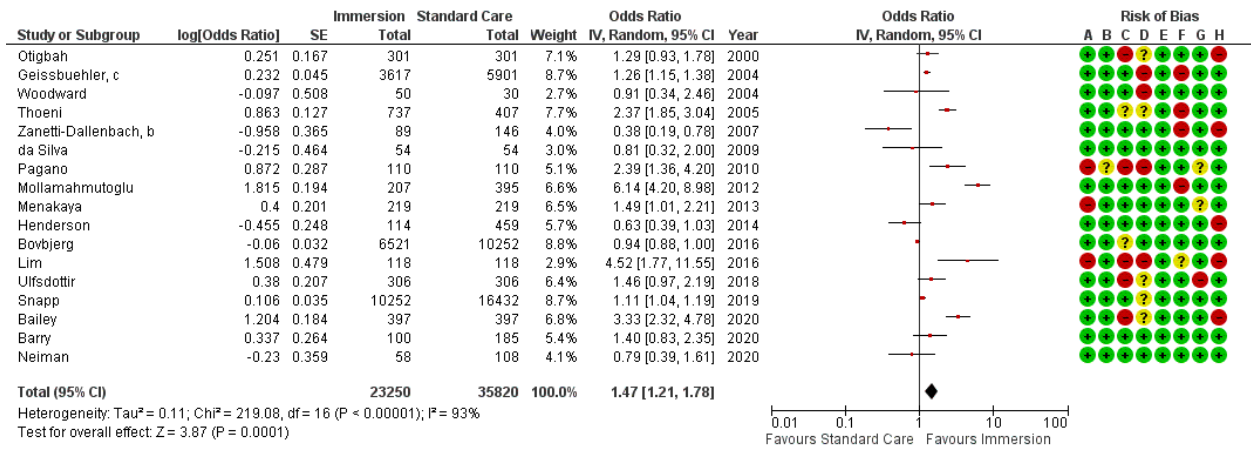

**Risk of bias legend**  
 (A) Domain 1: Bias due to sample selection  
 (B) Domain 2: Bias due to measurement of water immersion  
 (C) Domain 3: Bias due to comparability of the groups  
 (D) Domain 4: Bias due to departure from intended treatment  
 (E) Domain 5: Bias in measurement of the outcome: Maternal Medical Record  
 (F) Domain 6: Bias due to inadequate control for confounding  
 (G) Domain 7: Bias due to missing data  
 (H) Domain 8: Bias due to unreported outcomes

Figure 11 Forest Plot of Synthesis of Intact Perineum

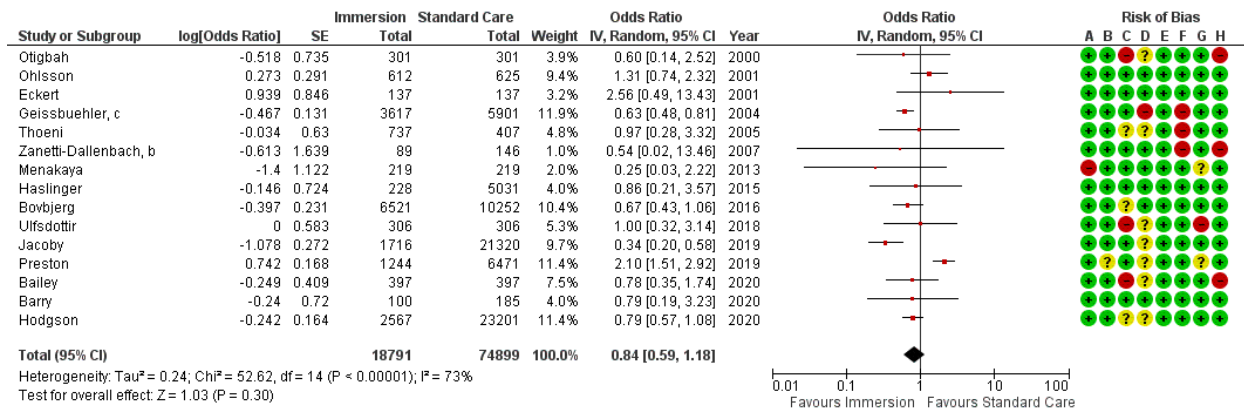

Risk of bias legend  
 (A) Domain 1: Bias due to sample selection  
 (B) Domain 2: Bias due to measurement of water immersion  
 (C) Domain 3: Bias due to comparability of the groups  
 (D) Domain 4: Bias due to departure from intended treatment  
 (E) Domain 5: Bias in measurement of the outcome: Maternal Medical Record  
 (F) Domain 6: Bias due to inadequate control for confounding  
 (G) Domain 7: Bias due to missing data  
 (H) Domain 8: Bias due to unreported outcomes

Figure 12 Forest Plot of Synthesis of Obstetric Anal Sphincter Injuries (OASI)

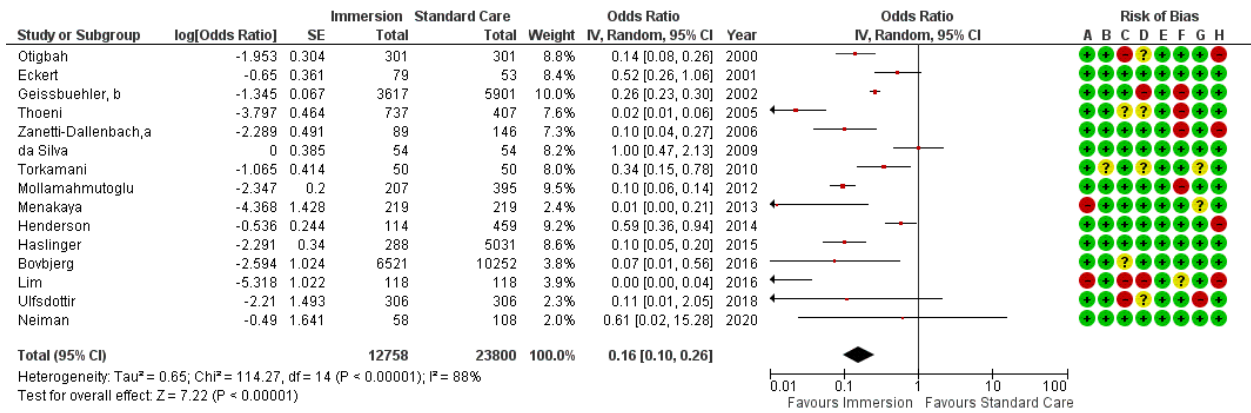

Figure 13 Forest Plot of Synthesis of Episiotomy



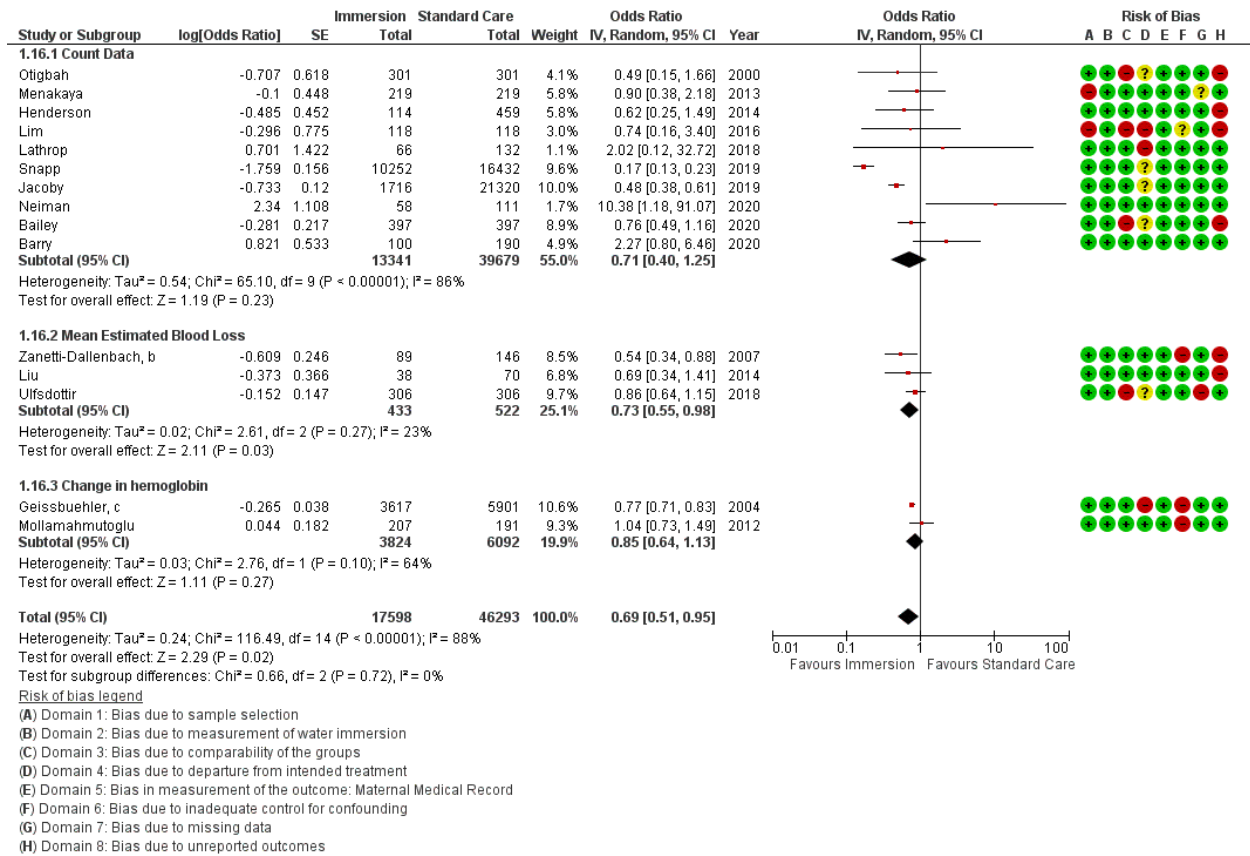

Figure 14 Forest Plot of Synthesis of Postpartum Hemorrhage

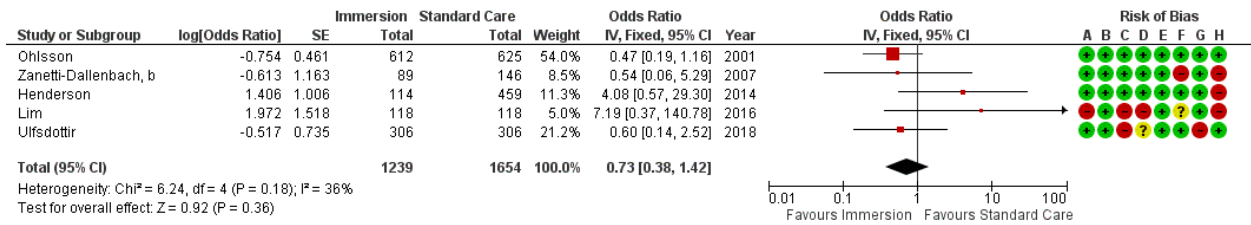

Risk of bias legend

- (A) Domain 1: Bias due to sample selection
- (B) Domain 2: Bias due to measurement of water immersion
- (C) Domain 3: Bias due to comparability of the groups
- (D) Domain 4: Bias due to departure from intended treatment
- (E) Domain 5: Bias in measurement of the outcome: Maternal Medical Record
- (F) Domain 6: Bias due to inadequate control for confounding
- (G) Domain 7: Bias due to missing data
- (H) Domain 8: Bias due to unreported outcomes

Figure 15 Forest Plot of Synthesis of Manual Removal of the Placenta

For peer review only

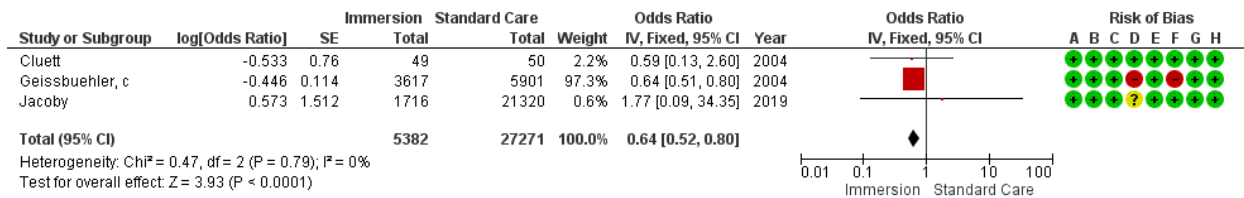

Risk of bias legend  
 (A) Domain 1: Bias due to sample selection  
 (B) Domain 2: Bias due to measurement of water immersion  
 (C) Domain 3: Bias due to comparability of the groups  
 (D) Domain 4: Bias due to departure from intended treatment  
 (E) Domain 5: Bias in measurement of the outcome: Maternal Medical Record  
 (F) Domain 6: Bias due to inadequate control for confounding  
 (G) Domain 7: Bias due to missing data  
 (H) Domain 8: Bias due to unreported outcomes

Figure 16 Forest Plot of Synthesis for Maternal Infection

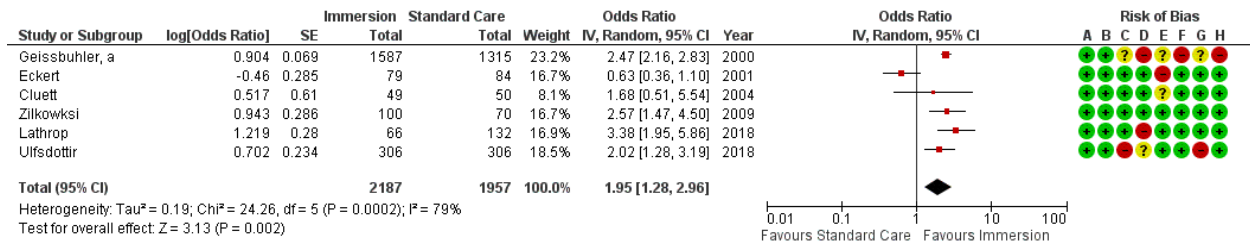

Risk of bias legend  
 (A) Domain 1: Bias due to sample selection  
 (B) Domain 2: Bias due to measurement of water immersion  
 (C) Domain 3: Bias due to comparability of the groups  
 (D) Domain 4: Bias due to departure from intended treatment  
 (E) Domain 5: Bias in measurement of the outcome: Satisfaction  
 (F) Domain 6: Bias due to inadequate control for confounding  
 (G) Domain 7: Bias due to missing data  
 (H) Domain 8: Bias due to unreported outcomes

Figure 17 Forest Plot of Synthesis of Maternal Satisfaction Measures

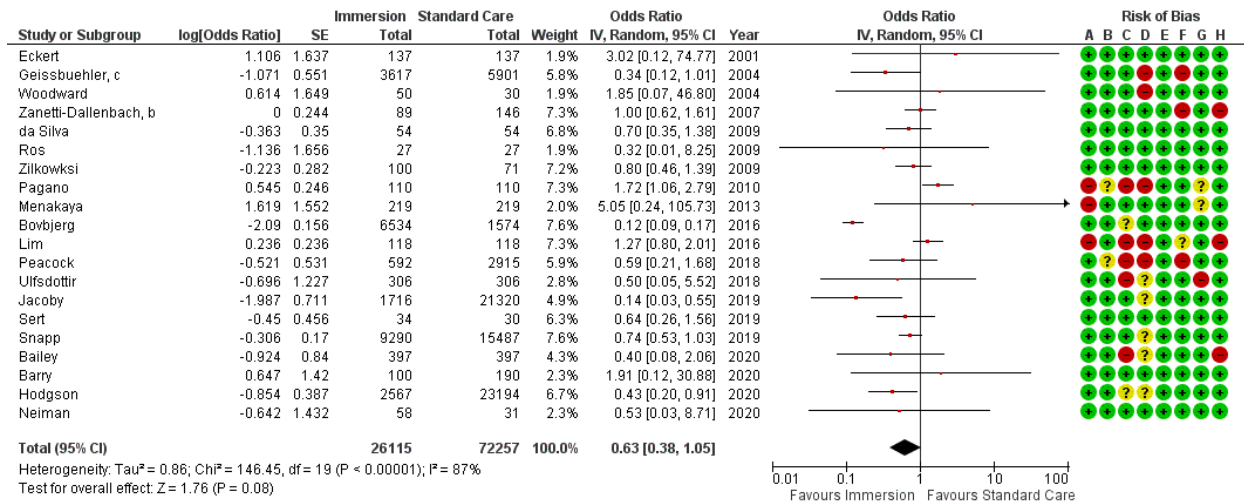

Figure 18 Forest Plot of Synthesis of 5-Minute APGAR

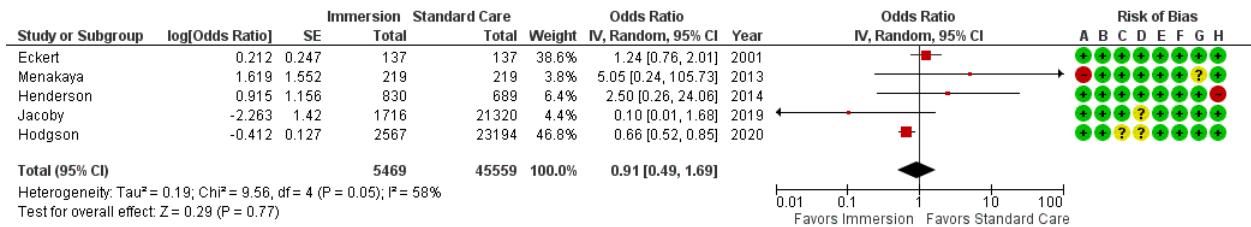

Risk of bias legend

- (A) Domain 1: Bias due to sample selection
- (B) Domain 2: Bias due to measurement of water immersion
- (C) Domain 3: Bias due to comparability of the groups
- (D) Domain 4: Bias due to departure from intended treatment
- (E) Domain 5: Bias in measurement of the outcome: Neonatal Medical Record
- (F) Domain 6: Bias due to inadequate control for confounding
- (G) Domain 7: Bias due to missing data
- (H) Domain 8: Bias due to unreported outcomes

Figure 19 Forest Plot of Synthesis of Neonatal Resuscitation

For peer review only

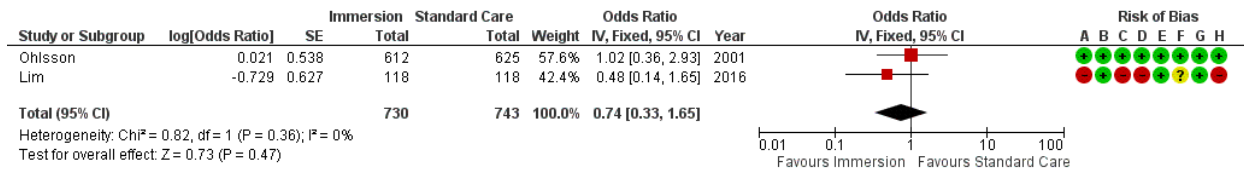

Risk of bias legend  
 (A) Domain 1: Bias due to sample selection  
 (B) Domain 2: Bias due to measurement of water immersion  
 (C) Domain 3: Bias due to comparability of the groups  
 (D) Domain 4: Bias due to departure from intended treatment  
 (E) Domain 5: Bias in measurement of the outcome: Neonatal Medical Record  
 (F) Domain 6: Bias due to inadequate control for confounding  
 (G) Domain 7: Bias due to missing data  
 (H) Domain 8: Bias due to unreported outcomes

Figure 20 Forest Plot of Synthesis of Transient Tachypnea of the Newborn

For peer review only

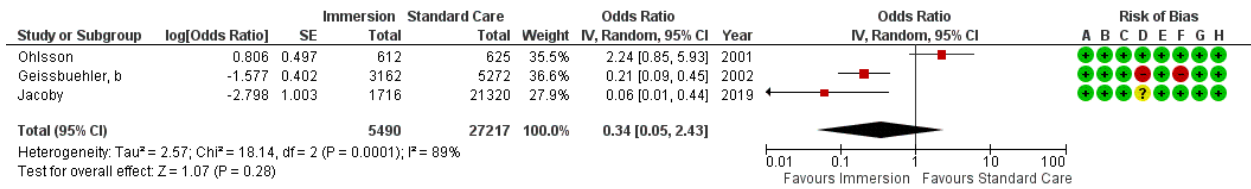

Risk of bias legend

- (A) Domain 1: Bias due to sample selection
- (B) Domain 2: Bias due to measurement of water immersion
- (C) Domain 3: Bias due to comparability of the groups
- (D) Domain 4: Bias due to departure from intended treatment
- (E) Domain 5: Bias in measurement of the outcome: Neonatal Medical Record
- (F) Domain 6: Bias due to inadequate control for confounding
- (G) Domain 7: Bias due to missing data
- (H) Domain 8: Bias due to unreported outcomes

Figure 21 Forest plot of Synthesis of Respiratory Distress

For peer review only



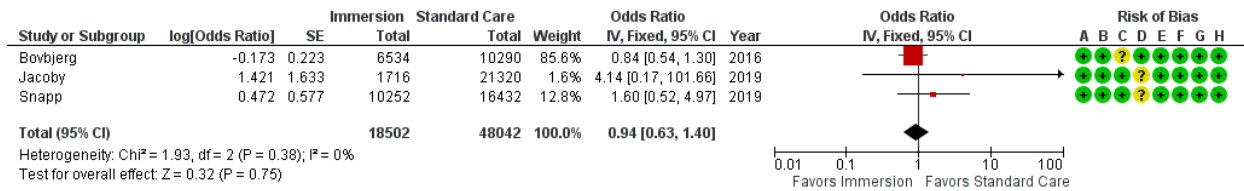

Risk of bias legend

- (A) Domain 1: Bias due to sample selection
- (B) Domain 2: Bias due to measurement of water immersion
- (C) Domain 3: Bias due to comparability of the groups
- (D) Domain 4: Bias due to departure from intended treatment
- (E) Domain 5: Bias in measurement of the outcome: Neonatal Medical Record
- (F) Domain 6: Bias due to inadequate control for confounding
- (G) Domain 7: Bias due to missing data
- (H) Domain 8: Bias due to unreported outcomes

Figure 22 Forest Plot of Synthesis of Neonatal Death

For peer review only

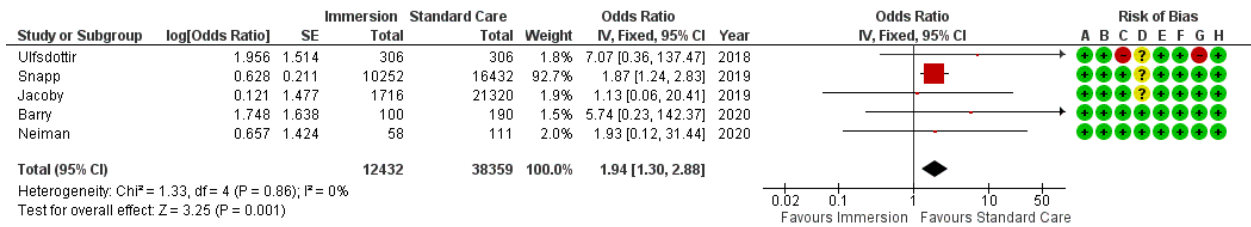

**Risk of bias legend**  
 (A) Domain 1: Bias due to sample selection  
 (B) Domain 2: Bias due to measurement of water immersion  
 (C) Domain 3: Bias due to comparability of the groups  
 (D) Domain 4: Bias due to departure from intended treatment  
 (E) Domain 5: Bias in measurement of the outcome: Maternal Medical Record  
 (F) Domain 6: Bias due to inadequate control for confounding  
 (G) Domain 7: Bias due to missing data  
 (H) Domain 8: Bias due to unreported outcomes

Figure 23 Forest Plot of Synthesis of Cord Avulsion

For peer review only

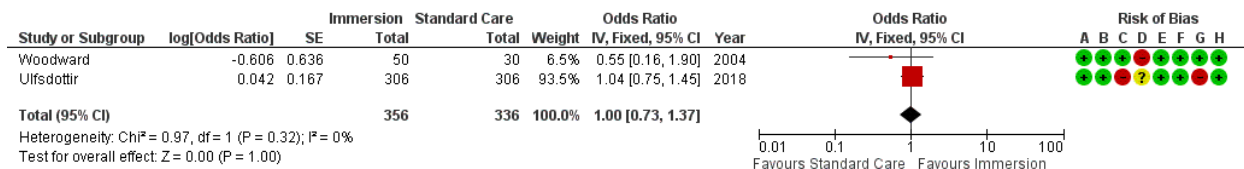

Risk of bias legend

- (A) Domain 1: Bias due to sample selection
- (B) Domain 2: Bias due to measurement of water immersion
- (C) Domain 3: Bias due to comparability of the groups
- (D) Domain 4: Bias due to departure from intended treatment
- (E) Domain 5: Bias in measurement of the outcome: Neonatal Medical Record
- (F) Domain 6: Bias due to inadequate control for confounding
- (G) Domain 7: Bias due to missing data
- (H) Domain 8: Bias due to unreported outcomes

Figure 24 Forest Plot of Synthesis of Breastfeeding Initiation

For peer review only

## Supplement 1 Search Information

## Pre-designed search terms

|                             |                                                                                                                                                                                                                                                                                                                                                                                                                                                                                                                                                                  |
|-----------------------------|------------------------------------------------------------------------------------------------------------------------------------------------------------------------------------------------------------------------------------------------------------------------------------------------------------------------------------------------------------------------------------------------------------------------------------------------------------------------------------------------------------------------------------------------------------------|
| Population                  | Primip* OR nullip* OR multip* OR term gestation* OR intra?partum OR birth* OR childbirth OR labo?r* OR parturition OR planned place birth* OR childbearing wom?n OR expectant wom?n OR expectant mother* OR labo?ring wom?n OR wom?n in labo?r                                                                                                                                                                                                                                                                                                                   |
| Intervention/Exposure water | Water OR water?birth OR water birth OR water immersion OR hydrotherapy OR birth* pool OR birth in water OR birth in pool                                                                                                                                                                                                                                                                                                                                                                                                                                         |
| Interventions during labour | Rupture membrane* OR spontaneous* OR artificial* OR augment*OR induc* OR epidural* OR oxytocin infusion OR opioid injection* OR transfer* OR transfer obstetric unit* OR electronic monitor* OR EFM OR cardiotocograph* OR auscultat* OR intermediate auscultate* OR physiological third stage OR expectant third stage OR physiological 3 <sup>rd</sup> stage OR expectant 3 <sup>rd</sup> stage OR managed third stage OR managed 3 <sup>rd</sup> stage OR active third stage OR active 3 <sup>rd</sup> stage OR placenta delivery OR delivery of the placenta |
| Outcomes Maternal           | spontaneous vaginal birth* OR spont* delivery OR perine* OR perineal OR trauma* OR anal sphincter OR OASIS OR obstetric anal sphincter injur* OR episiotom* OR postpartum h?emorrhage* OR PPH OR h?emorrhage* OR blood transfusion* OR blood product* OR red blood cell* OR infection* OR sepsis OR admission* OR readmission* OR pain OR numerical rating scales OR NRS OR visual analog scales OR VAS OR maternal health OR wom?n health                                                                                                                       |
| Outcomes Neonatal           | birthweight* OR gestation* OR Apgar score* OR resus* OR resuscitation OR ventilation* OR respiratory OR distress* OR transfer* OR transfer obstetric unit* OR paed* OR neonat* OR neonatal unit OR special care unit* OR antibiotic* OR admission* OR readmission* OR breastfeeding OR infection* OR sepsis OR antibiotic* OR new?born health OR neonat* health                                                                                                                                                                                                  |
| Time                        | Intrapartum OR intra?partum OR birth* OR child?birth OR labo?r* OR post?natal OR post?partum OR puerperium*                                                                                                                                                                                                                                                                                                                                                                                                                                                      |

### Pilot Search Terms

Population: Primip\* OR nullip\* OR multip\* OR parturient OR birth\* wom?n

Exposure : Water OR waterbirth OR water birth OR water immersion OR immersion OR hydrotherapy OR birth\* pool OR tub

Time: Intrapartum OR intra-partum OR birth\* OR childbirth OR labour\* OR labor\* OR parturition OR dilatation OR expulsion OR delivery of the placenta OR first stage OR second stage OR third stag

### Librarian Search Term Input

BNI (via Proquest)

S1 ab(Intrapartum OR intra-partum OR labor OR laboring OR labour OR labouring OR deliver\* OR childbirth\* OR birth\* OR parturition) OR ti(Intrapartum OR intra-partum OR labor OR laboring OR labour OR labouring OR deliver\* OR childbirth\* OR birth\* OR parturition) 98,180

S2 MAINSUBJECT.EXACT("Childbirth & labor") 12,308

S3 S1 OR S2 100,458

S4 ab((Water N/3 birth) OR waterbirth OR water-birth OR (birth\* N/3 tub) OR (birth\*N/3 pool\*) OR (water N/3 immersion)) OR ti((Water N/3 birth) OR waterbirth OR water-birth OR (birth\* N/3 tub) OR (birth\* N/3 pool\*) OR (water N/3 immersion)) 501

S5 S3 AND S4 424

CINAHL (via Ebscohost)

S1 TI ( Intrapartum OR intra-partum OR labor OR laboring OR labour OR labouring OR deliver\* OR childbirth\* OR birth\* OR parturition ) OR AB ( Intrapartum OR intra-partum OR labor OR laboring OR labour OR labouring OR deliver\* OR childbirth\* OR birth\* OR parturition ) 252,840

S2 (MH "Childbirth+") OR (MH "Labor+") 36,176

S3 S1 OR S2 263,207

S4 TI ( (Water N3 birth) OR waterbirth OR water-birth OR (birth\* N3 tub) OR (birth\* N3 pool\*) OR (water N3 immersion) ) OR AB ( (Water N3 birth) OR waterbirth OR water-birth OR (birth\* N3 tub) OR (birth\* N3 pool\*) OR (water N3 immersion) ) 1,264

S5 (MH "Water Birth") 600

S6 S4 OR S5 1,572

S7 S3 AND S6 824

PsycInfo (via Ebscohost)

S1 TI ( Intrapartum OR intra-partum OR labor OR laboring OR labour OR labouring OR deliver\* OR childbirth\* OR birth\* OR parturition ) OR AB ( Intrapartum OR intra-partum OR labor OR laboring OR labour OR labouring OR deliver\* OR childbirth\* OR birth\* OR parturition ) 187,428

S2 DE "Intrapartum Period" OR DE "Birth" OR DE "Labor (Childbirth)" OR DE "Natural Childbirth" OR DE "Premature Birth" 14,070

S3 S1 OR S2 190,598

S4 TI ( (Water N3 birth) OR waterbirth OR water-birth OR (birth\* N3 tub) OR (birth\* N3 pool\*) OR (water N3 immersion) ) OR AB ( (Water N3 birth) OR waterbirth OR water-birth OR (birth\* N3 tub) OR (birth\* N3 pool\*) OR (water N3 immersion) ) 461

S5 S3 AND S4 68

Medline (via Ebscohost)

S1 TI ( Intrapartum OR intra-partum OR labor OR laboring OR labour OR labouring OR deliver\* OR childbirth\* OR birth\* OR parturition ) OR AB ( Intrapartum OR intra-partum OR labor OR laboring OR labour OR labouring OR deliver\* OR childbirth\* OR birth\* OR parturition ) 971,137

S2 (MH "Parturition+") OR (MH "Labor, Obstetric+") 60,186

S3 S1 OR S2 989,569

S4 TI ( (Water N3 birth) OR waterbirth OR water-birth OR (birth\* N3 tub) OR (birth\* N3 pool\*) OR (water N3 immersion) ) OR AB ( (Water N3 birth) OR waterbirth OR water-birth OR (birth\* N3 tub) OR (birth\* N3 pool\*) OR (water N3 immersion) ) 6,075

S5 S3 AND S4 892

CINAHL Search

[Accessibility Information and Tips](#) Revised Date: 07/2015

[Print Search History](#)

Monday, March 09, 2020 9:20:23 AM

| #  | Query                                            | Limiters/Expanders                                                                    | Last Run Via                                                                                     | Results |
|----|--------------------------------------------------|---------------------------------------------------------------------------------------|--------------------------------------------------------------------------------------------------|---------|
| S8 | ((MH water birth) OR (S4 OR S5)) AND (S3 AND S6) | Limiters - Published Date: 20000101-20201231<br>Expanders - Apply equivalent subjects | Interface - EBSCOhost Research Databases<br>Search Screen - Advanced Search                      | 719     |
| S7 | ((MH water birth) OR (S4 OR S5)) AND (S3 AND S6) | Expanders - Apply equivalent subjects<br>Search modes - Boolean/Phrase                | Interface - EBSCOhost Research Databases<br>Search Screen - Advanced Search<br>Database - CINAHL | 826     |

1  
2  
3  
4  
5  
6  
7  
8  
9  
10  
11  
12  
13  
14  
15  
16  
17  
18  
19  
20  
21  
22  
23  
24  
25  
26  
27  
28  
29  
30  
31  
32  
33  
34  
35  
36  
37  
38  
39  
40  
41  
42  
43  
44  
45  
46  
47  
48  
49  
50  
51  
52  
53  
54  
55  
56  
57  
58  
59  
60

|    |                                                                                                                                                                                                                                                      |                                       |                                          |         |
|----|------------------------------------------------------------------------------------------------------------------------------------------------------------------------------------------------------------------------------------------------------|---------------------------------------|------------------------------------------|---------|
| S6 | (MH water birth) OR (S4 OR S5)                                                                                                                                                                                                                       | Expanders - Apply equivalent subjects | Interface - EBSCOhost Research Databases | 1,577   |
|    |                                                                                                                                                                                                                                                      | Search modes - Boolean/Phrase         | Search Screen - Advanced Search          |         |
|    |                                                                                                                                                                                                                                                      |                                       | Database - CINAHL                        |         |
| S5 | MH water birth                                                                                                                                                                                                                                       | Expanders - Apply equivalent subjects | Interface - EBSCOhost Research Databases | 602     |
|    |                                                                                                                                                                                                                                                      | Search modes - Boolean/Phrase         | Search Screen - Advanced Search          |         |
|    |                                                                                                                                                                                                                                                      |                                       | Database - CINAHL                        |         |
| S4 | TI water N3 birth OR TI ( waterbirth or water-birth ) OR TI birth* N3 tub OR TI birth* N3 pool* OR TI water N3 immersion OR AB water N3 birth OR AB ( waterbirth or water-birth ) OR AB birth* N3 tub OR AB birth* N3 pool* OR AB water N3 immersion | Expanders - Apply equivalent subjects | Interface - EBSCOhost Research Databases | 1,270   |
|    |                                                                                                                                                                                                                                                      | Search modes - Boolean/Phrase         | Search Screen - Advanced Search          |         |
|    |                                                                                                                                                                                                                                                      |                                       | Database - CINAHL                        |         |
| S3 | ((MH childbirth+ OR MH labor+ OR (S1 OR S2)) AND (S1 OR S2)) AND (S1 OR S2)                                                                                                                                                                          | Expanders - Apply equivalent subjects | Interface - EBSCOhost Research Databases | 263,754 |
|    |                                                                                                                                                                                                                                                      | Search modes - Boolean/Phrase         | Search Screen - Advanced Search          |         |
|    |                                                                                                                                                                                                                                                      |                                       | Database - CINAHL                        |         |
| S2 | MH childbirth+ OR MH labor+                                                                                                                                                                                                                          | Expanders - Apply equivalent subjects | Interface - EBSCOhost Research Databases | 36,225  |
|    |                                                                                                                                                                                                                                                      | Search modes - Boolean/Phrase         | Search Screen - Advanced Search          |         |

1  
2  
3  
4  
5  
6  
7  
8  
9  
10  
11  
12  
13  
14  
15  
16  
17  
18  
19  
20  
21  
22  
23  
24  
25  
26  
27  
28  
29  
30  
31  
32  
33  
34  
35  
36  
37  
38  
39  
40  
41  
42  
43  
44  
45  
46  
47  
48  
49  
50  
51  
52  
53  
54  
55  
56  
57  
58  
59  
60

S1 TI ( intrapartum or intra-partum or labor or laboring or labour or labouring or deliver\* or childbirth\* or birth\* or parturition ) OR AB ( intrapartum or intra-partum or labor or laboring or labour or labouring or deliver\* or childbirth\* or birth\* or parturition )

Expanders - Apply equivalent subjects  
Database - CINAHL  
Interface - EBSCOhost Research Databases  
253,388  
Search modes - Boolean/Phrase  
Search Screen - Advanced Search  
Database - CINAHL

Psychinfo Search

[Accessibility Information and Tips Revised Date: 07/2015](#)

[Print Search History](#)

Monday, March 09, 2020 9:59:32 AM

| #  | Query                                                                                                                                                                                                                                                                | Limiters/Expanders                    | Last Run Via                                                        | Results |
|----|----------------------------------------------------------------------------------------------------------------------------------------------------------------------------------------------------------------------------------------------------------------------|---------------------------------------|---------------------------------------------------------------------|---------|
| S5 | (TI water N3 birth OR TI ( waterbirth or water-birth ) OR TI birth* N3 tub OR TI birth* N3 pool OR TI water N3 immersion OR AB water N3 birth OR AB ( waterbirth or water-birth ) OR AB birth* N3 tub OR AB birth* N3 pool OR AB water N3 immersion) AND (S3 AND S4) | Expanders - Apply equivalent subjects | Interface - EBSCOhost Research Databases                            | 58      |
|    |                                                                                                                                                                                                                                                                      | Search modes - Boolean/Phrase         | Search Screen - Advanced Search                                     |         |
| S4 | TI water N3 birth OR TI ( waterbirth or water-birth ) OR TI birth* N3 tub OR TI birth* N3 pool OR TI water N3 immersion OR AB water N3 birth OR AB ( waterbirth or water-birth ) OR AB birth* N3 tub OR AB birth* N3 pool OR AB water N3 immersion                   | Expanders - Apply equivalent subjects | Database - APA PsycInfo<br>Interface - EBSCOhost Research Databases | 451     |
|    |                                                                                                                                                                                                                                                                      | Search modes - Boolean/Phrase         | Search Screen - Advanced Search                                     |         |



1  
2  
3  
4  
5  
6  
7  
8  
9  
10  
11  
12  
13  
14  
15  
16  
17  
18  
19  
20  
21  
22  
23  
24  
25  
26  
27  
28  
29  
30  
31  
32  
33  
34  
35  
36  
37  
38  
39  
40  
41  
42  
43  
44  
45  
46  
47  
48  
49  
50  
51  
52  
53  
54  
55  
56  
57  
58  
59  
60

|    |                                                                                                                                                                                                                                                                          |                                       |                                          |                         |  |
|----|--------------------------------------------------------------------------------------------------------------------------------------------------------------------------------------------------------------------------------------------------------------------------|---------------------------------------|------------------------------------------|-------------------------|--|
|    |                                                                                                                                                                                                                                                                          |                                       |                                          | Database - APA PsycInfo |  |
| S3 | ((MM "Intrapartum Period") OR (MM "Birth" OR MM "Birth Weight" OR MM "Caesarean Birth" OR MM "Labor (Childbirth)" OR MM "Natural Childbirth" OR MM "Premature Birth")) OR (MM "Labor (Childbirth)" OR MM "Caesarean Birth" OR MM "Intrapartum Period")) OR (S1 OR S2)    | Expanders - Apply equivalent subjects | Interface - EBSCOhost Research Databases | 190,277                 |  |
|    |                                                                                                                                                                                                                                                                          | Search modes - Boolean/Phrase         | Search Screen - Advanced Search          |                         |  |
|    |                                                                                                                                                                                                                                                                          |                                       | Database - APA PsycInfo                  |                         |  |
| S2 | ((MM "Intrapartum Period") OR (MM "Birth" OR MM "Birth Weight" OR MM "Caesarean Birth" OR MM "Labor (Childbirth)" OR MM "Natural Childbirth" OR MM "Premature Birth")) OR (MM "Labor (Childbirth)" OR MM "Caesarean Birth" OR MM "Intrapartum Period")                   | Expanders - Apply equivalent subjects | Interface - EBSCOhost Research Databases | 12,875                  |  |
|    |                                                                                                                                                                                                                                                                          | Search modes - Boolean/Phrase         | Search Screen - Advanced Search          |                         |  |
|    |                                                                                                                                                                                                                                                                          |                                       | Database - APA PsycInfo                  |                         |  |
| S1 | TI ( intrapartum or intra-partum or labor or laboring or labour or labouring or deliver* or childbirth* or birth* or parturition ) OR AB ( intrapartum or intra-partum or labor or laboring or labour or labouring or deliver* or childbirth* or birth* or parturition ) | Expanders - Apply equivalent subjects | Interface - EBSCOhost Research Databases | 187,669                 |  |
|    |                                                                                                                                                                                                                                                                          | Search modes - Boolean/Phrase         | Search Screen - Advanced Search          |                         |  |
|    |                                                                                                                                                                                                                                                                          |                                       | Database - APA PsycInfo                  |                         |  |

## Medline Search

[Accessibility Information and Tips](#) Revised Date: 07/2015

## Print Search History

Monday, March 09, 2020 11:32:22 AM

| #  | Query                                                                                                                                                                                                                                                            | Limiters/Expanders                       | Last Run Via                                                             | Results |
|----|------------------------------------------------------------------------------------------------------------------------------------------------------------------------------------------------------------------------------------------------------------------|------------------------------------------|--------------------------------------------------------------------------|---------|
| S5 | (TI Water N3 birth OR TI ( waterbirth or water-birth ) OR TI birth N3 tub OR TI birth N3 pool OR TI water N3 immersion OR AB Water N3 birth OR AB ( waterbirth or water-birth ) OR AB birth N3 tub OR AB birth N3 pool OR AB water N3 immersion) AND (S3 AND S4) | Expanders -<br>Apply equivalent subjects | Interface - EBSCOhost<br>Research Databases                              | 697     |
|    |                                                                                                                                                                                                                                                                  | Search modes -<br>Boolean/Phrase         | Search Screen - Advanced Search<br><br>Database - MEDLINE with Full Text |         |
| S4 | TI Water N3 birth OR TI ( waterbirth or water-birth ) OR TI birth N3 tub OR TI birth N3 pool OR TI water N3 immersion OR AB Water N3 birth OR AB ( waterbirth or water-birth ) OR AB birth N3 tub OR AB birth N3 pool OR AB water N3 immersion                   | Expanders -<br>Apply equivalent subjects | Interface - EBSCOhost<br>Research Databases                              | 5,881   |
|    |                                                                                                                                                                                                                                                                  | Search modes -<br>Boolean/Phrase         | Search Screen - Advanced Search<br><br>Database - MEDLINE with Full Text |         |
| S3 | (MH Parturition+ OR MH Labor, Obstetric+) OR (S1 OR S2)                                                                                                                                                                                                          | Expanders -<br>Apply equivalent subjects | Interface - EBSCOhost<br>Research Databases                              | 988,860 |
|    |                                                                                                                                                                                                                                                                  | Search modes -<br>Boolean/Phrase         | Search Screen - Advanced Search<br><br>Database - MEDLINE with Full Text |         |

1  
2  
3  
4  
5  
6  
7  
8  
9  
10  
11  
12  
13  
14  
15  
16  
17  
18  
19  
20  
21  
22  
23  
24  
25  
26  
27  
28  
29  
30  
31  
32  
33  
34  
35  
36  
37  
38  
39  
40  
41  
42  
43  
44  
45  
46  
47  
48  
49  
50  
51  
52  
53  
54  
55  
56  
57  
58  
59  
60

|    |                                                                                                                                                                                                                                                                          |                                          |                                             |         |
|----|--------------------------------------------------------------------------------------------------------------------------------------------------------------------------------------------------------------------------------------------------------------------------|------------------------------------------|---------------------------------------------|---------|
| S2 | MH Parturition+ OR MH Labor, Obstetric+                                                                                                                                                                                                                                  | Expanders -<br>Apply equivalent subjects | Interface - EBSCOhost<br>Research Databases | 60,125  |
|    |                                                                                                                                                                                                                                                                          | Search modes -<br>Boolean/Phrase         | Search Screen - Advanced Search             |         |
|    |                                                                                                                                                                                                                                                                          |                                          | Database - MEDLINE with Full Text           |         |
| S1 | TI ( intrapartum or intra-partum or labor or laboring or labour or labouring or deliver* or childbirth* or birth* or parturition ) OR AB ( intrapartum or intra-partum or labor or laboring or labour or labouring or deliver* or childbirth* or birth* or parturition ) | Expanders -<br>Apply equivalent subjects | Interface - EBSCOhost<br>Research Databases | 970,439 |
|    |                                                                                                                                                                                                                                                                          | Search modes -<br>Boolean/Phrase         | Search Screen - Advanced Search             |         |
|    |                                                                                                                                                                                                                                                                          |                                          | Database - MEDLINE with Full Text           |         |

Embase Search

| <a href="#">#</a> ▼ | Searches        | Results | Type     | Actions                                                 | Annotations |
|---------------------|-----------------|---------|----------|---------------------------------------------------------|-------------|
| 7                   | 3 and 6         | 552     | Advanced | <a href="#">Display Results</a><br><a href="#">More</a> |             |
| 6                   | 4 or 5          | 55859   | Advanced | <a href="#">Display Results</a><br><a href="#">More</a> |             |
| 5                   | exp labor/      | 34388   | Advanced | <a href="#">Display Results</a><br><a href="#">More</a> |             |
| 4                   | exp childbirth/ | 55859   | Advanced | <a href="#">Display Results</a>                         |             |

|    |   |                                                                                                                                                                                                                                                                        |         |          |                                 |
|----|---|------------------------------------------------------------------------------------------------------------------------------------------------------------------------------------------------------------------------------------------------------------------------|---------|----------|---------------------------------|
| 1  |   |                                                                                                                                                                                                                                                                        |         |          | <a href="#">More</a>            |
| 2  |   |                                                                                                                                                                                                                                                                        |         |          |                                 |
| 3  |   |                                                                                                                                                                                                                                                                        |         |          |                                 |
| 4  |   |                                                                                                                                                                                                                                                                        |         |          |                                 |
| 5  | 3 | 1 and 2                                                                                                                                                                                                                                                                | 39342   | Advanced | <a href="#">Display Results</a> |
| 6  |   |                                                                                                                                                                                                                                                                        |         |          |                                 |
| 7  |   |                                                                                                                                                                                                                                                                        |         |          |                                 |
| 8  |   |                                                                                                                                                                                                                                                                        |         |          | <a href="#">More</a>            |
| 9  |   |                                                                                                                                                                                                                                                                        |         |          |                                 |
| 10 | 2 | (water or waterbirth or water birth or water immersion or hydrotherapy or birth* pool).ti. or (water or waterbirth or water birth or water immersion or hydrotherapy or birth* pool).ab.                                                                               | 883990  | Advanced | <a href="#">Display Results</a> |
| 11 |   |                                                                                                                                                                                                                                                                        |         |          |                                 |
| 12 |   |                                                                                                                                                                                                                                                                        |         |          |                                 |
| 13 |   |                                                                                                                                                                                                                                                                        |         |          |                                 |
| 14 |   |                                                                                                                                                                                                                                                                        |         |          |                                 |
| 15 |   |                                                                                                                                                                                                                                                                        |         |          |                                 |
| 16 |   |                                                                                                                                                                                                                                                                        |         |          |                                 |
| 17 |   |                                                                                                                                                                                                                                                                        |         |          |                                 |
| 18 | 1 | (intrapartum or intra-partum or labor or laboring or labour or labouring or deliver* or childbirth* or birth* or parturition).ti. or (intrapartum or intra-partum or labor or laboring or labour or labouring or deliver* or childbirth* or birth* or parturition).ab. | 1283598 | Advanced | <a href="#">Display Results</a> |
| 19 |   |                                                                                                                                                                                                                                                                        |         |          |                                 |
| 20 |   |                                                                                                                                                                                                                                                                        |         |          |                                 |
| 21 |   |                                                                                                                                                                                                                                                                        |         |          |                                 |
| 22 |   |                                                                                                                                                                                                                                                                        |         |          |                                 |
| 23 |   |                                                                                                                                                                                                                                                                        |         |          |                                 |
| 24 |   |                                                                                                                                                                                                                                                                        |         |          |                                 |
| 25 |   |                                                                                                                                                                                                                                                                        |         |          |                                 |
| 26 |   |                                                                                                                                                                                                                                                                        |         |          |                                 |

### Cochrane Central Search

#### Search

Name: water

Date Run: 3/9/2020 4:18:27 PM

Comment:

| ID | Search                                                                                                                                                                | Hits   |
|----|-----------------------------------------------------------------------------------------------------------------------------------------------------------------------|--------|
|    | intrapartum or intra-partum or labor or laboring or labour or labouring or deliver* or childbirth* or birth* or parturition                                           | 109154 |
| #1 | MeSH descriptor: [Labor, Obstetric] explode all trees                                                                                                                 | 2298   |
| #2 | MeSH descriptor: [Parturition] explode all trees                                                                                                                      | 408    |
| #3 | #1 or #2 or #3                                                                                                                                                        | 109322 |
| #4 | (water NEAR birth):ti,ab,kw OR (water NEAR immersion):ti,ab,kw OR (waterbirth* or water-birth*):ti,ab,kw OR (birth* NEAR tub):ti,ab,kw OR (birth* NEAR pool):ti,ab,kw | 788    |
| #5 | #4 AND #5                                                                                                                                                             | 87     |
| #6 |                                                                                                                                                                       |        |

### Results

| Database | Number of hits |
|----------|----------------|
| CINAHL   | 719            |
| pyshinfo | 58             |
| MEDLINE  | 697            |
| EMBASE   | 552            |

|    |                           |             |
|----|---------------------------|-------------|
| 1  |                           |             |
| 2  |                           |             |
| 3  | COCHRANE                  | 87          |
| 4  |                           | <b>2113</b> |
| 5  |                           |             |
| 6  |                           |             |
| 7  | Duplicates removed        | 446         |
| 8  |                           | 1667        |
| 9  |                           |             |
| 10 |                           |             |
| 11 | Screened                  |             |
| 12 | title/abstract            | 1667        |
| 13 | Excluded                  | 1561        |
| 14 | Included for full text    | <b>106</b>  |
| 15 |                           |             |
| 16 |                           |             |
| 17 | Full text EXCLUDED        | 49          |
| 18 | <b>Full text INCLUDED</b> | <b>57</b>   |
| 19 | BMC update                | 1           |
| 20 |                           | 58 INCLUDED |
| 21 |                           |             |
| 22 |                           |             |
| 23 |                           |             |
| 24 |                           |             |
| 25 |                           |             |

#### *Excluded Reasons*

| 27 | <b>Reasons for exclusions</b> | <b>Number</b> |
|----|-------------------------------|---------------|
| 28 | Unable to obtain text         | 11            |
| 29 | Wrong study outcomes          | 7             |
| 30 | Wrong study design            | 6             |
| 31 | Conference abstract           | 5             |
| 32 | Discussion paper not research | 2             |
| 33 | Reprinted publication         | 1             |
| 34 | Unable to translate text      | 9             |
| 35 | Duplicate                     | 4             |
| 36 | Letter not research           | 2             |
| 37 | Wrong publication type        | 1             |
| 38 | Poster                        | 1             |
| 39 |                               | 49            |
| 40 |                               |               |
| 41 |                               |               |
| 42 |                               |               |
| 43 |                               |               |
| 44 |                               |               |
| 45 |                               |               |
| 46 |                               |               |
| 47 |                               |               |
| 48 |                               |               |
| 49 |                               |               |
| 50 |                               |               |
| 51 |                               |               |
| 52 |                               |               |
| 53 |                               |               |
| 54 |                               |               |
| 55 |                               |               |
| 56 |                               |               |
| 57 |                               |               |
| 58 |                               |               |
| 59 |                               |               |
| 60 |                               |               |

Supplement 2: Directed Acyclic Graphs to identify assumptions of covariates likely to cause heterogeneity in the outcomes.

DAG 1: Assumptions about variables associated with variation in mode of birth.



BMJ

1  
2  
3  
4  
5  
6  
7  
8  
9  
10  
11  
12  
13  
14  
15  
16  
17  
18  
19  
20  
21  
22  
23  
24  
25  
26  
27  
28  
29  
30  
31  
32  
33  
34  
35  
36  
37  
38  
39  
40  
41  
42  
43  
44  
45  
46  
47  
48  
49  
50  
51  
52  
53  
54  
55  
56  
57  
58  
59  
60

DAG 2: Assumptions about variables associated with variation in maternal satisfaction



only

DAG 3: Assumptions about variables associated with variation in perineal outcomes.

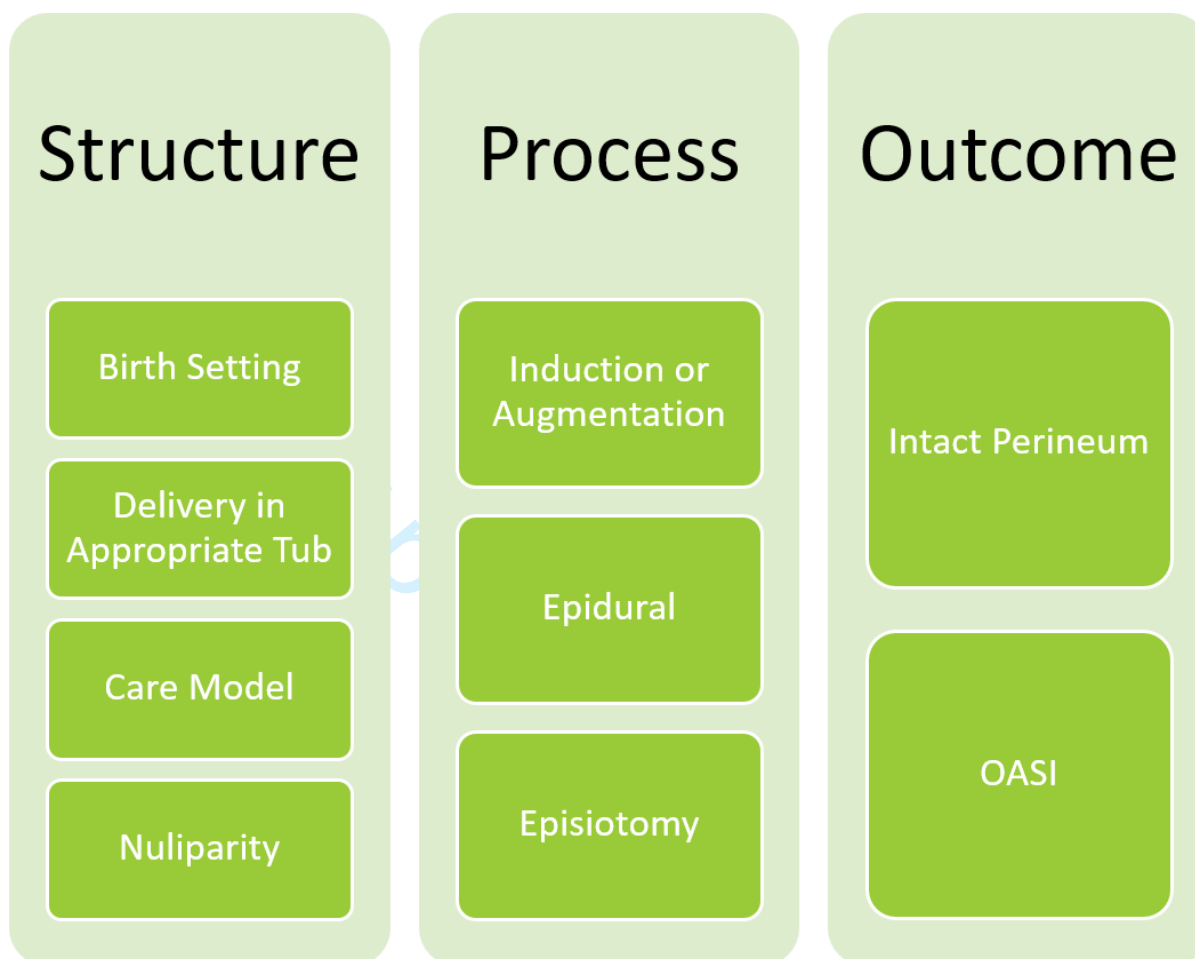



1  
2  
3  
4  
5  
6  
7  
8  
9  
10  
11  
12  
13  
14  
15  
16  
17  
18  
19  
20  
21  
22  
23  
24  
25  
26  
27  
28  
29  
30  
31  
32  
33  
34  
35  
36  
37  
38  
39  
40  
41  
42  
43  
44  
45  
46  
47  
48  
49  
50  
51  
52  
53  
54  
55  
56  
57  
58  
59  
60

DAG 4: Assumptions about variables associated with variation in maternal infection.

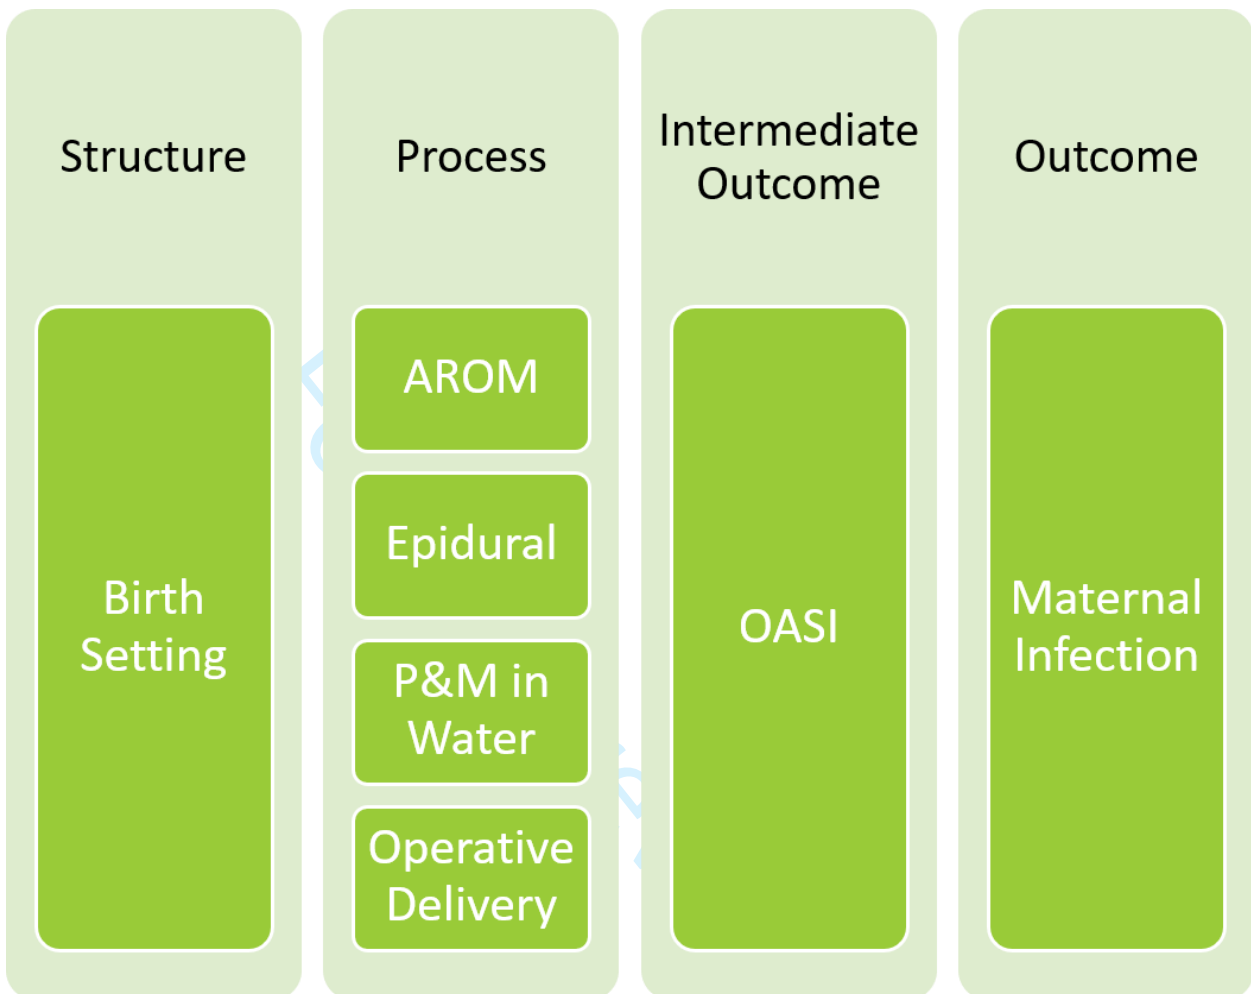

DAG 5: Assumptions about variables associated with variation in neonatal outcomes.

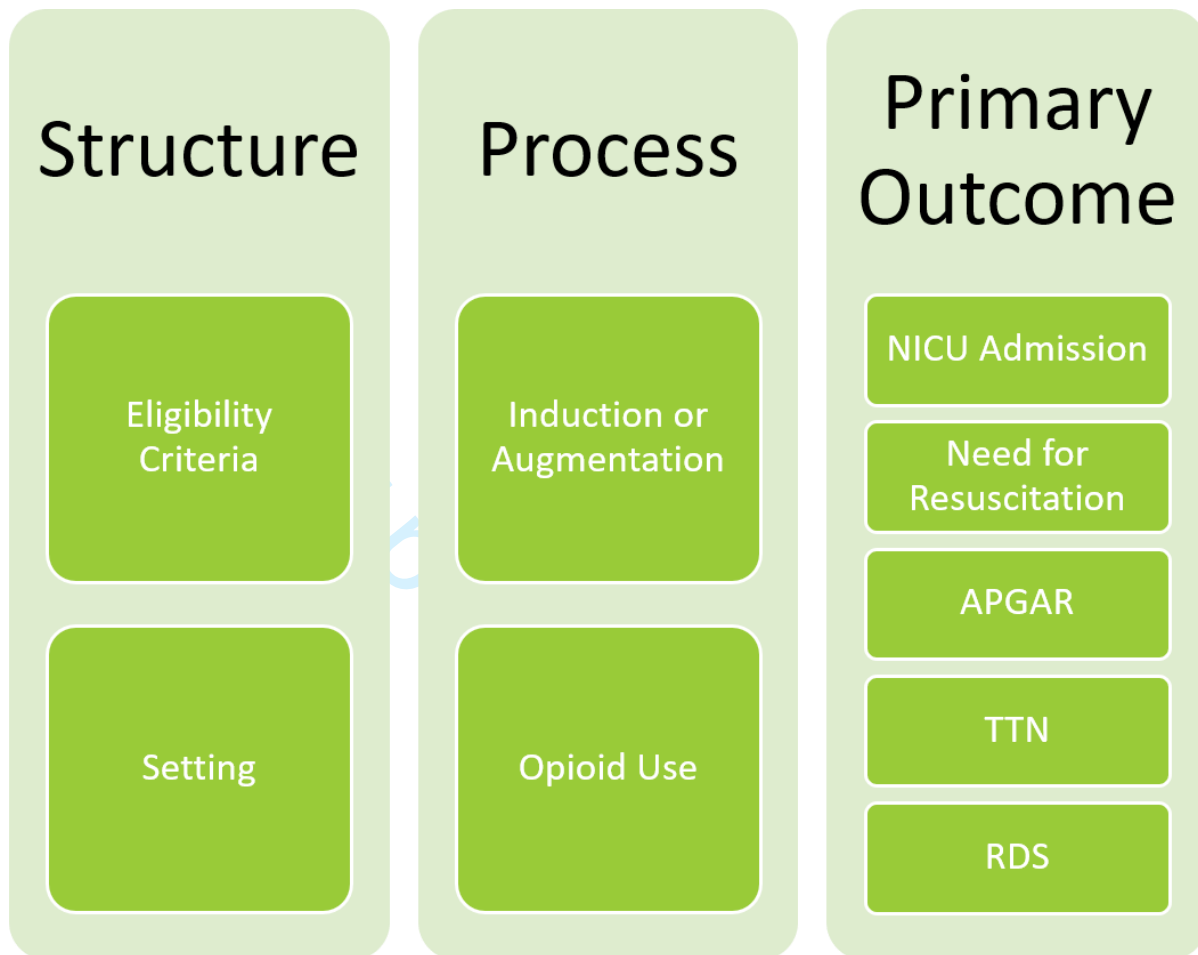

### Supplement 3: Studies excluded during full text review; systematic review and meta-analysis of interventions and outcomes with water birth.

- Bodner, K., Bodner-Adler, B., Wierrani, F., Mayerhofer, K., Fousek, C., Niedermayr, A., & Grünberger, W. (2002). Effects of water birth on maternal and neonatal outcomes. *Wiener Klinische Wochenschrift*, 114(10), 391–395. [UNABLE TO OBTAIN TEXT]
- Carlson N.S., Corwin E.J., & Lowe N.K. (2017). Labor Intervention and Outcomes in Women Who Are Nulliparous and Obese: Comparison of Nurse-Midwife to Obstetrician Intrapartum Care. *J. Midwifery Women's Health*, 62(1), 29–39. [WRONG STUDY OUTCOMES]
- Cluett ER, Pickering RM, & Brooking JI. (2001). An investigation into the feasibility of comparing three management options (augmentation, conservative and water) for nulliparae with dystocia in the first stage of labour. *Midwifery*, 17(1), 35–43. [WRONG STUDY DESIGN]
- Combellick, J. L., Shin, H., Shin, D., Cai, Y., Hagan, H., Lacher, C., Lin, D. L., McCauley, K., Lynch, S. V., & Dominguez-Bello, M. G. (2018). Differences in the fecal microbiota of neonates born at home or in the hospital. *Scientific Reports*, 8(1), 15660–15660. [WRONG OUTCOME]
- Damodaran S., Khatri P., Mahmood T.A., & Monaghan S.C. (2010). Waterbirths in Fife: A 6-year observational study. *J. Obstet. Gynaecol.*, 30(7), 759. [CONFERENCE ABSTRACT]
- de Freitas Brilhante, A., a, Moreira Vasconcelos, C. T., de Castro Damasceno, A. K., Martins Pereira, A. M., da Silva Coelho, T., & Mendes de Freitas, C. (2017). OBSTETRICAL NURSES EVALUATION OF WATER BIRTHS. *Journal of Nursing UFPE / Revista de Enfermagem UFPE*, 11(11), 4418–4423. [WRONG STUDY DESIGN]
- Eberhard, J., & Geissbühler, V. (2000). Influence of alternative birth methods on traditional birth management. *Fetal Diagnosis And Therapy*, 15(5), 283–290. [WRONG STUDY DESIGN]
- Eberhard J., Geissbuhler V., Chiffelle Ch., & Stein S. (2001). Alternative delivery methods and changes in obstetric practice. *Geburtshilfe Frauenheilkd.*, 61(10), 771–777. [UNABLE TO OBTAIN]
- Eckert K., Turnbull D., & MacLennan A. (2001). Warm water bathing did not reduce use of pharmacological analgesia during the first stage of labour. *Evid.-Based Med.*, 6(6), 177. [CONFERENCE ABSTRACT]
- Fehervary, P., Lauinger-Lörsch, E., Hof, H., Melchert, F., Bauer, L., & Zieger, W. (2004). Water birth: Microbiological colonisation of the newborn, neonatal and maternal infection rate in comparison to conventional bed deliveries. *Archives Of Gynecology And Obstetrics*, 270(1), 6–9. [WRONG OUTCOMES]
- Geissbühler, V., & Eberhard, J. (2000). Waterbirths: A comparative study. A prospective study on more than 2,000 waterbirths. *Fetal Diagnosis And Therapy*, 15(5), 291–300. [DUPLICATE]
- Geissbuhler V. (2004). Alternative delivery positions: Bed, chair or water birth. *Geburtshilfe Frauenheilkd.*, 64(8), 856–857. [DISCUSSION NOT PRIMARY RESEARCH]
- Geissbühler, V., & Eberhard, J. (2002). [Alternative obstetrics: Bed, chair or tub? Have alternative birthing methods become established?]. *Therapeutische Umschau. Revue Therapeutique*, 59(12), 689–695. [DISCUSSION NOT PRIMARY RESEARCH]
- Geissbühler, Verena, & Eberhard, J. (2003). [Experience] with water births: A prospective longitudinal study of 9 years with almost 4,000 water births]. *Gynäkologisch-Geburtshilfliche Rundschau*, 43(1), 12–18. [REPRINTED PUBLICATION]
- Gephart L.F., McDonald V., & Daucher J.A. (2013). A preliminary exploration of the affect of water birth on infantand maternal morbidity in the United States. *Female Pelvic Med. Reconstr. Surg.*, 19, S124. [CONFERENCE ABSTRACT]
- Ghasemi, M., Tara, F., & Ashraf, H. (2013). Maternal-fetal and neonatal complications of water-birth compared with conventional delivery. *Iranian Journal of Obstetrics, Gynecology and Infertility*, 16(70), 9–15. [UNABLE TO TRANSLATE TEXT]
- Ghasemi M., & Valiani M. (2014). Water Birth; method, benefits and indications in comparison with normal vaginal delivery in women parturient in Isfahan University of Medical Sciences' hospitals. *Iran. J. Reprod. Med.*, 12(6), 48–49. [DUPLICATE/UNABLE TO TRANSLATE]
- Grodzka, M., Makowska, P., Wielgoś, M., Przyboś, A., Chrostowska, J., & Marianowski, L. (2001). [Water birth in the parturients' estimation]. *Ginekologia Polska*, 72(12), 1025–1030. [UNABLE TO OBTAIN TEXT]
- Hesson A., Bailey J.M., Carver A.R., & Langen E.S. (2019). 673: Supporting Vaginal Birth: Effects of labor support measures on cesarean delivery rates. *Am. J. Obstet. Gynecol.*, 220(1), S445. [CONFERENCE ABSTRACT]
- Heydari S.T., Sarikhani Y., Asadi N., Kazemi M., Sadati A.K., Zarei S., Mansuri Z., Keshvarz F., Jabbari R., Mohtashami A., & Lankarani K.B. (2019). Selection of delivery method and its related factors in pregnant women of shiraz in 2016. *Shiraz E Med. J.*, 20(5), e81676. [WRONG STUDY DESIGN]

- Homer C, Eckert K, Turnbull D, & MacLennan A. (2002). Immersion in water during first stage of labor...Eckert K, Turnbull D, MacLennan A. Immersion in water in the first stage of labor: A randomized controlled trial. *BIRTH* 2001;28(2):84-93. *Birth: Issues in Perinatal Care*, 29(1), 76-77. [LETTER NOT RESEARCH]
- IRCT2015111725002N2. (2016). The impact of water birth on childbirth. <http://www.who.int/trialssearch/Trial2.aspx?TrialID=IRCT2015111725002N2>. <https://www.cochranelibrary.com/central/doi/10.1002/central/CN-01870447/full> [WRONG PUBLICATION TYPE]
- Kavosi, Z., Keshtkaran, A., Setoodehzadeh, F., Kasraeian, M., Khammarnia, M., & Eslahi, M. (2015). A Comparison of Mothers' Quality of Life after Normal Vaginal, Cesarean, and Water Birth Deliveries. *International Journal of Community Based Nursing & Midwifery*, 3(3), 198-204. [WRONG OUTCOMES]
- Kiani K., Shahpourian F., Sedighian H., & Hosseini F. (2009). Effect of water birth on labor pain during active phase of labor. *Int. J. Gynecol. Obstet.*, 107, S227. [CONFERENCE ABSTRACT]
- Kowalewska, M., Welfel, E., Kawczyński, P., & Pokrzywnicka, M. (2004). [Clinical condition of newborns from water birth at the Perinatology Clinic, Institute Of Gynecology and Obstetrics of the Medical University in Łódź, in the years 1996-2001]. *Ginekologia Polska*, 75(4), 267-273. [UNABLE TO TRANSLATE TEXT]
- Malarewicz, A., Wydrzynski, G., Szymkiewicz, J., & Adamczyk-Gruszka, O. (2005). [The influence of water immersion on the course of first stage of parturition in primiparous women]. *Medycyna Wieku Rozwojowego*, 9(4), 773-780. [UNABLE TO OBTAIN TEXT]
- Moneta, J., Oknińska, A., Wielgoś, M., Przyboś, A., Chrostowska, J., & Marianowski, L. (2001). [The influence of water immersion on the course of labor]. *Ginekologia Polska*, 72(12), 1031-1036. [UNABLE TO TRANSLATE]
- O'Sullivan M., Basude S., Bahl R., & Mohan A. (2017). Does giving birth in water increase rates of perineal trauma and OASI (Obstetric Anal Sphincter Injury)? *BJOG Int. J. Obstet. Gynaecol.*, 124, 69. [POSTER PRESENTATION]
- Overgaard, C., Fenger-Grøn, M., S, & all, J. (2012). Freestanding midwifery units versus obstetric units: Does the effect of place of birth differ with level of social disadvantage? *BMC Public Health*, 12, 478-478. [WRONG OUTCOMES]
- Peacock P.J., Zengeya S.T., Cochrane L., & Sleath M. (2017). Neonatal outcomes following delivery in water: Evaluation of safety in a district general hospital. *Arch. Dis. Child.*, 102, A92. [DUPLICATE]
- Pellantová, S., Vebera, Z., & Půček, P. (2003). [Water delivery—a 5-year retrospective study]. *Ceska Gynekologie*, 68(3), 175-179. [UNABLE TO TRANSLATE]
- Righetti, P. L., Pernici, A., Casadei, D., Panizzo, F., Romagnolo, C., & Maggino, T. (2009). La nascita: Uno sguardo al vissuto materno Una ricerca empirica sull'impatto di tre modalità di parto sull'emozionalità e le rappresentazioni materne = The birth: A look at the mothers' psychological view An empirical research on the impact of three methods of birth on emotionality and maternal representations. *Giornale Di Psicologia*, 3(1), 83-105. [WRONG STUDY DESIGN]
- Sidebottom AC, Vacquier M, Simon K, et al. Maternal and Neonatal Outcomes in Hospital-Based Deliveries With Water Immersion. *Obstet Gynecol.* 2020;136(4):707-715. doi:10.1097/AOG.0000000000003956 [No Comparison Group]
- Sindik N. (2006). Water birth. *Gynaecol. Perinatol. Suppl.*, 15(1), 33-36. [UNABLE TO TRANSLATE]
- Sipiński, A., Poreba, R., Cnota, W., & Poreba, A. (2000). [The analysis of 135 water births]. *Ginekologia Polska*, 71(4), 208-212. [UNABLE TO TRANSLATE]
- Stark M.A., Rudell B., & Haus G. (2008). Observing position and movements in hydrotherapy: A pilot study. *JOGNN J. Obstet. Gynecol. Neonatal Nurs.*, 37(1), 116-122. [WRONG OUTCOMES]
- Thoeni A., Oberhuber A., & Moroder L. (2003). Giving birth and being born in the water. Experience after 1325 waterbirths. *Ital. J. Gynaecol. Obstet.*, 15(3), 113-120. [UNABLE TO OBTAIN]
- Thoni A., & Azzolini M.E. (2003). A review of 1136 waterbirths. *G. Ital. Ostet. Ginecol.*, 25(7), 305-311. [UNABLE TO OBTAIN]
- Thoni A., & Krauss P. (2000). Waterbirth: A review of 500 deliveries and a comparison with other delivery positions. *Ital. J. Gynaecol. Obstet.*, 12(3), 83-87. [UNABLE TO OBTAIN]
- Thöni, A., & Murari, S. (2001). [Birth in water. A comparative study after 555 births in water]. *Minerva Ginecologica*, 53(1), 29-34. [UNABLE TO OBTAIN]
- Thoni A., Murari S., & Zech N. (2006). Giving birth and being born in the water. Report following 1850 underwater births. *Ital. J. Gynaecol. Obstet.*, 18(1), 11-17. [UNABLE TO OBTAIN]
- Thoni A., & Mussner K. (2002). Water birth—A review of 969 deliveries and a comparison with other delivery positions. *Geburtshilfe Frauenheilkd.*, 62(10), 977-981. [UNABLE TO TRANSLATE]
- Thoni A., & Mussner K. (2002). Water birth—A review of 969 deliveries and a comparison with other delivery positions. *Geburtshilfe Frauenheilkd.*, 62(10), 977-981. [DUPLICATE]

- 1 Thöni, A., Mussner, K., & Ploner, F. (2010). [Water birthing: Retrospective review of 2625 water births. Contamination of birth pool  
2 water and risk of microbial cross-infection]. *Minerva Ginecologica*, 62(3), 203–211. [UNABLE TO TRANSLATE]
- 3 Thöni, A., Zech, N., & Moroder, L. (2005). [Water birth and neonatal infections. Experience with 1575 deliveries in water]. *Minerva  
4 Ginecologica*, 57(2), 199–206. [UNABLE TO OBTAIN]
- 5 Thoni A., Zech N., Moroder L., Mussner K., & Ploner F. (2005). The risk of infection in water births. *Gynakol. Prax.*, 29(2), 233–241.  
6 [UNABLE TO OBTAIN]
- 7
- 8 Zaidi J, Zaidi F, Bradshaw H, Cluett ER, Getliffe K, Pickering RM, Saunders NJS, Robins JB, & Smith R. (2004). Labouring in  
9 water...Cluett ER, Pickering RM, Getliffe K, Saunders NJ. Randomised controlled trial of labouring in water compared with standard of  
10 augmentation for management of dystocia in first stage of labour. *BMJ* 2004;328:314. (7 February.). *BMJ: British Medical Journal  
11 (International Edition)*, 328(7442), 767–768. [LETTER NOT RESEARCH]
- 12
- 13 Zanetti-Dällenbach, R. A., Holzgreve, W., & Hösli, I. (2007). Neonatal group B streptococcus colonization in water  
14 births. *International Journal Of Gynaecology And Obstetrics: The Official Organ Of The International Federation Of Gynaecology And  
15 Obstetrics*, 98(1), 54–55. [WRONG OUTCOMES]
- 16 Zanetti-Dallenbach R., Lapaire O., Holzgreve W., & Hosli I. (2007). Neonatal colonization-rate with group B streptococcus is lower in  
17 neonates born underwater than after conventional vaginal delivery. *Geburtshilfe Frauenheilkd.*, 67(10), 1114–1119. [WRONG STUDY  
18 OUTCOMES]
- 19
- 20 Zanetti-Dällenbach, R., Lapaire, O., Maertens, A., Frei, R., Holzgreve, W., & Hösli, I. (2006). Water birth: Is the water an additional  
21 reservoir for group B streptococcus? *Archives Of Gynecology And Obstetrics*, 273(4), 236–238. [WRONG STUDY DESIGN]
- 22  
23  
24  
25  
26  
27  
28  
29  
30  
31  
32  
33  
34  
35  
36  
37  
38  
39  
40  
41  
42  
43  
44  
45  
46  
47  
48  
49  
50  
51  
52  
53  
54  
55  
56  
57  
58  
59  
60

## Supplement 4: Certainty of Estimates using GRADE Criteria

### Challenges of Applying GRADE to Water Immersion

When using the GRADE Criteria for water immersion, the certainty of the evidence for all outcomes begins at the level of “low” because most water immersion research is conducted as prospective observational studies. GRADE scores observational studies as less certain than randomized controlled trials. Unfortunately, randomized controlled trials of water immersion do not automatically reduce bias because of the nature of the intervention. Blinding of the care provider and participants is not possible and there is no control that can act as a placebo. This increases the risks for performance bias, detection bias, and reporting bias. Uneven attrition is expected as women randomized to water have many legitimate reasons for exiting the water, such as to use the bathroom or to facilitate fetal monitoring. In contrast, women randomized to standard care are unlikely to be asked to enter the water. This attrition bias causes challenges with intention to treat analyses, especially for outcomes that are only relevant if the birth occurs in water. A further challenge occurs in recruiting a sample willing to be randomized. Women who desire water immersion are less willing to be randomized. This selection bias produces a sample that does not represent the population that chooses water immersion for pain control. Given these limitations, randomized controlled trials reduce as much bias as a well-controlled prospective study.

The GRADE criteria assume a study is assessing the superiority of one intervention over another. However, most water immersion studies are interested in equivalency of outcomes. GRADE criteria allow upgrading for large magnitude of effect, but this is not possible when the purpose of a study is to demonstrate no increased risk of poor outcomes. GRADE criteria also allow upgrading for demonstration of a dose-effect. However there is no dose of water immersion; instead women enter and leave the pool at will and the length of immersion is determined by the length of labor. This leaves only one category of upgrading available to studies of water immersion – plausible confounding.

Understanding the limitations of applying the GRADE criteria to water immersion, we recommend readers interpret the results of the GRADE assessment with caution. A GRADE of “low” certainty for water immersion does not necessarily indicate a need for more research. We point to the example of postpartum hemorrhage. Thirteen studies reporting on 63,891 participants have been synthesized to demonstrate there is no increased risk of postpartum hemorrhage with water immersion. Grade assessment indicates the level of certainty is low, but fail-safe analysis indicated an additional 198 studies are needed to change the results to no difference. Fail-safe N is only calculated when the result favors water immersion or the standard care, so these comparisons are not available for outcomes reporting no difference.

### Description of Assessment Criteria

1  
2  
3 Risk of Bias in individual studies are provided in the forest plots for each outcome. Grade criteria reduce certainty of an estimate if an  
4 outcome had serious limitations likely to result in a biased estimate, including accounting for the weight of each study to the final  
5 estimate.  
6

7  
8 Inconsistency of estimates between studies was expected as part of this review, as the purpose was to identify reasons for  
9 heterogeneity. Because the eligibility criteria for this study reflect intentionally seeking papers in different settings, inconsistency is  
10 not a criteria to assess the certainty of the estimate.  
11

12 Indirectness of the evidence reduces certainty when the population studied is not the population for the intended review. The study of  
13 water immersion is limited to women at low risk of birth complications, so this criterion does not affect the certainty of the evidence.  
14

15 Imprecision of the estimate for a systematic review is generally measuring the ability of the evidence to find a statistically significant  
16 result, however one purpose of studies of water immersion is to demonstrate no increased risk of harm. For the purposes of GRADE  
17 assessment, certainty was downgraded for imprecision when the sample available for meta-analysis had less than 2000 participants.  
18

19  
20 Publication bias reduces certainty because it assumes studies with negative results are left unpublished. Prior studies have found  
21 publication bias that favors standard care over water immersion. This means the outcome is likely more favorable of water immersion  
22 than the estimate suggests and we can be more certain that water immersion is safe. To accommodate the standard Grade format,  
23 certainty of a result will be downgraded when the trim and fill test indicate the potential publication bias is enough to change the  
24 results.  
25

26  
27 Certainty of evidence is upgraded when the magnitude of effect is large, using standard risk ratios to define large and very large. For  
28 rare outcomes, such as those reported with water immersion, the OR becomes equivalent to the risk ratio, allowing this study to use  
29 the standard Grade Criteria for large effect ( $RR > 2$  or  $< 0.5$ ) and very large ( $RR > 5$  or  $< 0.2$ ) for most outcomes.  
30

31  
32 Certainty of evidence is upgraded when the evidence suggests a dose-effect. Water immersion does not have defined doses, instead  
33 women enter and exit the tub at will. In general, the length of immersion is determined by the length of labor.

34  
35 Certainty of evidence is upgraded when controlling for potential sources of confounding are likely to result in a more favorable  
36 outcome for water immersion. For this table, studies are upgraded if the result from meta-regression was more favorable than the main  
37 analysis.  
38  
39  
40  
41  
42  
43  
44  
45  
46  
47

**Supplement 4 Table 1: GRADE Criteria for interventions and outcomes with water immersion for labor and delivery.**

| Outcome                    | Studies | Sample Size | Reduce Grade |               |              |             |                  | Increase Grade |             |                       | Final Grade | Importance | Fail-safe N |
|----------------------------|---------|-------------|--------------|---------------|--------------|-------------|------------------|----------------|-------------|-----------------------|-------------|------------|-------------|
|                            |         |             | Risk of Bias | Inconsistency | Indirectness | Imprecision | Publication Bias | Magnitude      | Dose-Effect | Plausible Confounding |             |            |             |
| Induction                  | 3       | 2,008       | -            | n.d.          | -            | -           | -                | -              | n.d.        | -                     | Low         | Limited    | -           |
| Amniotomy                  | 5       | 1,627       | -            | n.d.          | -            | ↓           | -                | -              | n.d.        | -                     | Low         | Limited    | -           |
| Augmentation               | 3       | 1,420       | -            | n.d.          | -            | ↓           | -                | ↑              | n.d.        | -                     | Low         | Important  | -           |
| Fetal Monitoring           | 0       | 0           | -            | n.d.          | -            | -           | -                | -              | n.d.        | -                     | NONE        | Limited    | -           |
| Opioid                     | 8       | 27,391      | -            | n.d.          | -            | -           | -                | ↑              | n.d.        | -                     | Moderate    | Important  | 972         |
| Epidural                   | 7       | 10,993      | -            | n.d.          | -            | -           | -                | ↑              | n.d.        | -                     | Moderate    | Important  | 100         |
| Pain                       | 8       | 1,200       | -            | n.d.          | -            | ↓           | -                | ↑              | n.d.        | -                     | Low         | Important  | 279         |
| Cesarean                   | 8       | 1,575       | -            | n.d.          | -            | ↓           | -                | -              | n.d.        | -                     | Very Low    | Critical   | -           |
| Shoulder Dystocia          | 7       | 53,367      | -            | n.d.          | -            | -           | -                | -              | n.d.        | -                     | Low         | Critical   | -           |
| Intact Perineum            | 14      | 59,070      | -            | n.d.          | -            | -           | -                | -              | n.d.        | ↑                     | Moderate    | Limited    | 358         |
| OASI                       | 14      | 93,690      | -            | n.d.          | -            | -           | -                | -              | n.d.        | -                     | Low         | Important  | -           |
| Episiotomy                 | 13      | 36,498      | -            | n.d.          | -            | -           | -                | ↑↑             | n.d.        | ↑                     | Very High   | Important  | 1525        |
| Third Stage Management     | 0       | 0           | -            | n.d.          | -            | -           | -                | -              | n.d.        | -                     | NONE        | Limited    | -           |
| Postpartum Hemorrhage      | 13      | 63,891      | -            | n.d.          | -            | -           | -                | -              | n.d.        | -                     | Low         | Critical   | 198         |
| Manual Removal of Placenta | 5       | 2,893       | -            | n.d.          | -            | -           | -                | -              | n.d.        | -                     | Low         | Critical   | -           |
| Maternal Infection         | 3       | 32,653      | -            | n.d.          | -            | -           | -                | -              | n.d.        | -                     | Low         | Important  | -           |
| Satisfaction               | 6       | 4,144       | -            | n.d.          | -            | -           | -                | -              | n.d.        | -                     | Low         | Important  | 133         |
| APGAR                      | 16      | 100,881     | -            | n.d.          | -            | -           | -                | -              | n.d.        | ↑                     | Moderate    | Important  | -           |
| Neonatal Resuscitation     | 5       | 51,028      | -            | n.d.          | -            | -           | -                | -              | n.d.        | -                     | Low         | Critical   | -           |
| Transient Tachypnea        | 2       | 1,473       | -            | n.d.          | -            | ↓           | -                | -              | n.d.        | -                     | Very Low    | Limited    | -           |



1  
2  
3  
4  
5  
6  
7  
8  
9  
10  
11  
12  
13  
14  
15  
16  
17  
18  
19  
20  
21  
22  
23  
24  
25  
26  
27  
28  
29  
30  
31  
32  
33  
34  
35  
36  
37  
38  
39  
40  
41  
42  
43  
44  
45  
46  
47

| Outcome                           | Studies | Sample Size | Reduce Grade |               |              |             |                  | Increase Grade |             |                       | Final Grade | Importance | Fail-safe N |
|-----------------------------------|---------|-------------|--------------|---------------|--------------|-------------|------------------|----------------|-------------|-----------------------|-------------|------------|-------------|
|                                   |         |             | Risk of Bias | Inconsistency | Indirectness | Imprecision | Publication Bias | Magnitude      | Dose-Effect | Plausible Confounding |             |            |             |
| Respiratory Distress              | 3       | 32,707      | -            | n.d.          | -            | -           | -                | -              | n.d.        | -                     | Low         | Critical   | -           |
| Neonatal Intensive Unit Admission | 0       | 0           | -            | n.d.          | -            | -           | -                | -              | n.d.        | -                     | NONE        | Critical   | -           |
| Neonatal Death                    | 3       | 66,544      | -            | n.d.          | -            | -           | -                | -              | n.d.        | -                     | Low         | Critical   | -           |
| Infection in Newborn Period       | 0       | 0           | -            | n.d.          | -            | -           | -                | -              | n.d.        | -                     | NONE        | Important  | -           |
| Cord Avulsion                     | 5       | 50,791      | -            | n.d.          | -            | -           | -                | -              | n.d.        | -                     | Low         | Limited    | 5           |
| Breastfeeding Initiation          | 2       | 692         | -            | n.d.          | -            | ↓           | -                | -              | n.d.        | -                     | Very Low    | Important  | -           |

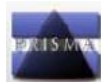

## PRISMA 2020 Checklist

| Section and Topic             | Item # | Checklist item                                                                                                                                                                                                                                                                                       | Location where item is reported |
|-------------------------------|--------|------------------------------------------------------------------------------------------------------------------------------------------------------------------------------------------------------------------------------------------------------------------------------------------------------|---------------------------------|
| <b>TITLE</b>                  |        |                                                                                                                                                                                                                                                                                                      |                                 |
| Title                         | 1      | Identify the report as a systematic review.                                                                                                                                                                                                                                                          | Title P.1                       |
| <b>ABSTRACT</b>               |        |                                                                                                                                                                                                                                                                                                      |                                 |
| Abstract                      | 2      | See the PRISMA 2020 for Abstracts checklist.                                                                                                                                                                                                                                                         | p1                              |
| <b>INTRODUCTION</b>           |        |                                                                                                                                                                                                                                                                                                      |                                 |
| Rationale                     | 3      | Describe the rationale for the review in the context of existing knowledge.                                                                                                                                                                                                                          | p6                              |
| Objectives                    | 4      | Provide an explicit statement of the objective(s) or question(s) the review addresses.                                                                                                                                                                                                               | p7                              |
| <b>METHODS</b>                |        |                                                                                                                                                                                                                                                                                                      |                                 |
| Eligibility criteria          | 5      | Specify the inclusion and exclusion criteria for the review and how studies were grouped for the syntheses.                                                                                                                                                                                          | p7-8                            |
| Information sources           | 6      | Specify all databases, registers, websites, organisations, reference lists and other sources searched or consulted to identify studies. Specify the date when each source was last searched or consulted.                                                                                            | p8                              |
| Search strategy               | 7      | Present the full search strategies for all databases, registers and websites, including any filters and limits used.                                                                                                                                                                                 | p8, Sup 1                       |
| Selection process             | 8      | Specify the methods used to decide whether a study met the inclusion criteria of the review, including how many reviewers screened each record and each report retrieved, whether they worked independently, and if applicable, details of automation tools used in the process.                     | p9                              |
| Data collection process       | 9      | Specify the methods used to collect data from reports, including how many reviewers collected data from each report, whether they worked independently, any processes for obtaining or confirming data from study investigators, and if applicable, details of automation tools used in the process. | p9                              |
| Data items                    | 10a    | List and define all outcomes for which data were sought. Specify whether all results that were compatible with each outcome domain in each study were sought (e.g. for all measures, time points, analyses), and if not, the methods used to decide which results to collect.                        | P9                              |
|                               | 10b    | List and define all other variables for which data were sought (e.g. participant and intervention characteristics, funding sources). Describe any assumptions made about any missing or unclear information.                                                                                         | P9                              |
| Study risk of bias assessment | 11     | Specify the methods used to assess risk of bias in the included studies, including details of the tool(s) used, how many reviewers assessed each study and whether they worked independently, and if applicable, details of automation tools used in the process.                                    | p9, 10                          |
| Effect measures               | 12     | Specify for each outcome the effect measure(s) (e.g. risk ratio, mean difference) used in the synthesis or presentation of results.                                                                                                                                                                  | P10                             |
| Synthesis methods             | 13a    | Describe the processes used to decide which studies were eligible for each synthesis (e.g. tabulating the study intervention characteristics and comparing against the planned groups for each synthesis (item #5)).                                                                                 | p10                             |
|                               | 13b    | Describe any methods required to prepare the data for presentation or synthesis, such as handling of missing summary statistics, or data conversions.                                                                                                                                                | P10<br>Tables 2-3               |
|                               | 13c    | Describe any methods used to tabulate or visually display results of individual studies and syntheses.                                                                                                                                                                                               | P10                             |
|                               | 13d    | Describe any methods used to synthesize results and provide a rationale for the choice(s). If meta-analysis was performed, describe the model(s), method(s) to identify the presence and extent of statistical heterogeneity, and software package(s) used.                                          | P10                             |
|                               | 13e    | Describe any methods used to explore possible causes of heterogeneity among study results (e.g. subgroup analysis, meta-regression).                                                                                                                                                                 | P10                             |
|                               | 13f    | Describe any sensitivity analyses conducted to assess robustness of the synthesized results.                                                                                                                                                                                                         | P10-11                          |
| Reporting bias assessment     | 14     | Describe any methods used to assess risk of bias due to missing results in a synthesis (arising from reporting biases).                                                                                                                                                                              | P10                             |
| Certainty                     | 15     | Describe any methods used to assess certainty (or confidence) in the body of evidence for an outcome.                                                                                                                                                                                                | p11                             |

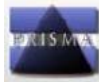

## PRISMA 2020 Checklist

| Section and Topic             | Item # | Checklist item                                                                                                                                                                                                                                                                       | Location where item is reported |
|-------------------------------|--------|--------------------------------------------------------------------------------------------------------------------------------------------------------------------------------------------------------------------------------------------------------------------------------------|---------------------------------|
| assessment                    |        |                                                                                                                                                                                                                                                                                      |                                 |
| <b>RESULTS</b>                |        |                                                                                                                                                                                                                                                                                      |                                 |
| Study selection               | 16a    | Describe the results of the search and selection process, from the number of records identified in the search to the number of studies included in the review, ideally using a flow diagram.                                                                                         | P11; figure 1                   |
|                               | 16b    | Cite studies that might appear to meet the inclusion criteria, but which were excluded, and explain why they were excluded.                                                                                                                                                          | Supplement 3                    |
| Study characteristics         | 17     | Cite each included study and present its characteristics.                                                                                                                                                                                                                            | Table 1,2,3                     |
| Risk of bias in studies       | 18     | Present assessments of risk of bias for each included study.                                                                                                                                                                                                                         | Figures 3-24                    |
| Results of individual studies | 19     | For all outcomes, present, for each study: (a) summary statistics for each group (where appropriate) and (b) an effect estimate and its precision (e.g. confidence/credible interval), ideally using structured tables or plots.                                                     | Figures 3-24                    |
| Results of syntheses          | 20a    | For each synthesis, briefly summarise the characteristics and risk of bias among contributing studies.                                                                                                                                                                               | P24-36; Figures 3-24            |
|                               | 20b    | Present results of all statistical syntheses conducted. If meta-analysis was done, present for each the summary estimate and its precision (e.g. confidence/credible interval) and measures of statistical heterogeneity. If comparing groups, describe the direction of the effect. | P24-36; Figures 3-24            |
|                               | 20c    | Present results of all investigations of possible causes of heterogeneity among study results.                                                                                                                                                                                       | P24-36; Figures 3-24            |
|                               | 20d    | Present results of all sensitivity analyses conducted to assess the robustness of the synthesized results.                                                                                                                                                                           | P24-36; Table 4                 |
| Reporting biases              | 21     | Present assessments of risk of bias due to missing results (arising from reporting biases) for each synthesis assessed.                                                                                                                                                              | P24-36; Table 5                 |
| Certainty of evidence         | 22     | Present assessments of certainty (or confidence) in the body of evidence for each outcome assessed.                                                                                                                                                                                  | P 38; Supplement 4              |
| <b>DISCUSSION</b>             |        |                                                                                                                                                                                                                                                                                      |                                 |
| Discussion                    | 23a    | Provide a general interpretation of the results in the context of other evidence.                                                                                                                                                                                                    | P39                             |
|                               | 23b    | Discuss any limitations of the evidence included in the review.                                                                                                                                                                                                                      | P41-42                          |
|                               | 23c    | Discuss any limitations of the review processes used.                                                                                                                                                                                                                                | P41-42                          |
|                               | 23d    | Discuss implications of the results for practice, policy, and future research.                                                                                                                                                                                                       | P42                             |
| <b>OTHER INFORMATION</b>      |        |                                                                                                                                                                                                                                                                                      |                                 |
| Registration and protocol     | 24a    | Provide registration information for the review, including register name and registration number, or state that the review was not registered.                                                                                                                                       | P7                              |
|                               | 24b    | Indicate where the review protocol can be accessed, or state that a protocol was not prepared.                                                                                                                                                                                       | P4                              |
|                               | 24c    | Describe and explain any amendments to information provided at registration or in the protocol.                                                                                                                                                                                      | P4                              |

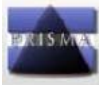

## PRISMA 2020 Checklist

| Section and Topic                              | Item # | Checklist item                                                                                                                                                                                                                             | Location where item is reported |
|------------------------------------------------|--------|--------------------------------------------------------------------------------------------------------------------------------------------------------------------------------------------------------------------------------------------|---------------------------------|
| Support                                        | 25     | Describe sources of financial or non-financial support for the review, and the role of the funders or sponsors in the review.                                                                                                              | P4                              |
| Competing interests                            | 26     | Declare any competing interests of review authors.                                                                                                                                                                                         | P5                              |
| Availability of data, code and other materials | 27     | Report which of the following are publicly available and where they can be found: template data collection forms; data extracted from included studies; data used for all analyses; analytic code; any other materials used in the review. | NA                              |

From: Page MJ, McKenzie JE, Bossuyt PM, Boutron I, Hoffmann TC, Mulrow CD, et al. The PRISMA 2020 statement: an updated guideline for reporting systematic reviews. *BMJ* 2021;372:n71. doi: 10.1136/bmj.n71

For more information, visit: <http://www.prisma-statement.org/>

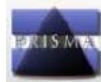

## PRISMA 2020 for Abstracts Checklist

| Section and Topic       | Item # | Checklist item                                                                                                                                                                                                                                                                                        | Reported (Yes/No) |
|-------------------------|--------|-------------------------------------------------------------------------------------------------------------------------------------------------------------------------------------------------------------------------------------------------------------------------------------------------------|-------------------|
| <b>TITLE</b>            |        |                                                                                                                                                                                                                                                                                                       |                   |
| Title                   | 1      | Identify the report as a systematic review.                                                                                                                                                                                                                                                           | YES               |
| <b>BACKGROUND</b>       |        |                                                                                                                                                                                                                                                                                                       |                   |
| Objectives              | 2      | Provide an explicit statement of the main objective(s) or question(s) the review addresses.                                                                                                                                                                                                           | YES               |
| <b>METHODS</b>          |        |                                                                                                                                                                                                                                                                                                       |                   |
| Eligibility criteria    | 3      | Specify the inclusion and exclusion criteria for the review.                                                                                                                                                                                                                                          | YES               |
| Information sources     | 4      | Specify the information sources (e.g. databases, registers) used to identify studies and the date when each was last searched.                                                                                                                                                                        | YES               |
| Risk of bias            | 5      | Specify the methods used to assess risk of bias in the included studies.                                                                                                                                                                                                                              | YES               |
| Synthesis of results    | 6      | Specify the methods used to present and synthesise results.                                                                                                                                                                                                                                           | YES               |
| <b>RESULTS</b>          |        |                                                                                                                                                                                                                                                                                                       |                   |
| Included studies        | 7      | Give the total number of included studies and participants and summarise relevant characteristics of studies.                                                                                                                                                                                         | YES               |
| Synthesis of results    | 8      | Present results for main outcomes, preferably indicating the number of included studies and participants for each. If meta-analysis was done, report the summary estimate and confidence/credible interval. If comparing groups, indicate the direction of the effect (i.e. which group is favoured). | YES               |
| <b>DISCUSSION</b>       |        |                                                                                                                                                                                                                                                                                                       |                   |
| Limitations of evidence | 9      | Provide a brief summary of the limitations of the evidence included in the review (e.g. study risk of bias, inconsistency and imprecision).                                                                                                                                                           | YES               |
| Interpretation          | 10     | Provide a general interpretation of the results and important implications.                                                                                                                                                                                                                           | YES               |
| <b>OTHER</b>            |        |                                                                                                                                                                                                                                                                                                       |                   |
| Funding                 | 11     | Specify the primary source of funding for the review.                                                                                                                                                                                                                                                 | YES               |
| Registration            | 12     | Provide the register name and registration number.                                                                                                                                                                                                                                                    | YES               |

From: Page MJ, McKenzie JE, Bossuyt PM, Boutron I, Hoffmann TC, Mulrow CD, et al. The PRISMA 2020 statement: an updated guideline for reporting systematic reviews. *BMJ* 2021;372:n71. doi: 10.1136/bmj.n71

For more information, visit: <http://www.prisma-statement.org/>

# BMJ Open

## A systematic review and meta-analysis to examine intrapartum interventions, and maternal and neonatal outcomes following immersion in water during labour and waterbirth

|                                 |                                                                                                                                                                                                                                                                                                                                                                     |
|---------------------------------|---------------------------------------------------------------------------------------------------------------------------------------------------------------------------------------------------------------------------------------------------------------------------------------------------------------------------------------------------------------------|
| Journal:                        | <i>BMJ Open</i>                                                                                                                                                                                                                                                                                                                                                     |
| Manuscript ID                   | bmjopen-2021-056517.R2                                                                                                                                                                                                                                                                                                                                              |
| Article Type:                   | Original research                                                                                                                                                                                                                                                                                                                                                   |
| Date Submitted by the Author:   | 12-Apr-2022                                                                                                                                                                                                                                                                                                                                                         |
| Complete List of Authors:       | Burns, Ethel ; Oxford Brookes University Faculty of Health and Life Sciences, Faculty of Health and Life Sciences<br>Feeley, Claire; Oxford Brookes University, Faculty of Health and Life Sciences<br>Hall, Priscilla J.; Emory University, VA School of Nursing Academic Partnership ;<br>Vanderlaan, Jennifer; University of Nevada Las Vegas, School of Nursing |
| <b>Primary Subject Heading</b>: | Obstetrics and gynaecology                                                                                                                                                                                                                                                                                                                                          |
| Secondary Subject Heading:      | Nursing                                                                                                                                                                                                                                                                                                                                                             |
| Keywords:                       | Pain management < ANAESTHETICS, Maternal medicine < OBSTETRICS, PRIMARY CARE                                                                                                                                                                                                                                                                                        |
|                                 |                                                                                                                                                                                                                                                                                                                                                                     |

SCHOLARONE™  
Manuscripts



I, the Submitting Author has the right to grant and does grant on behalf of all authors of the Work (as defined in the below author licence), an exclusive licence and/or a non-exclusive licence for contributions from authors who are: i) UK Crown employees; ii) where BMJ has agreed a CC-BY licence shall apply, and/or iii) in accordance with the terms applicable for US Federal Government officers or employees acting as part of their official duties; on a worldwide, perpetual, irrevocable, royalty-free basis to BMJ Publishing Group Ltd ("BMJ") its licensees and where the relevant Journal is co-owned by BMJ to the co-owners of the Journal, to publish the Work in this journal and any other BMJ products and to exploit all rights, as set out in our [licence](#).

The Submitting Author accepts and understands that any supply made under these terms is made by BMJ to the Submitting Author unless you are acting as an employee on behalf of your employer or a postgraduate student of an affiliated institution which is paying any applicable article publishing charge ("APC") for Open Access articles. Where the Submitting Author wishes to make the Work available on an Open Access basis (and intends to pay the relevant APC), the terms of reuse of such Open Access shall be governed by a Creative Commons licence – details of these licences and which [Creative Commons](#) licence will apply to this Work are set out in our licence referred to above.

Other than as permitted in any relevant BMJ Author's Self Archiving Policies, I confirm this Work has not been accepted for publication elsewhere, is not being considered for publication elsewhere and does not duplicate material already published. I confirm all authors consent to publication of this Work and authorise the granting of this licence.

1  
2  
3  
4  
5 **A systematic review and meta-analysis to examine intrapartum interventions, and**  
6 **maternal and neonatal outcomes following immersion in water during labour and**  
7 **waterbirth**  
8  
9

10  
11 **Authors**  
12

13  
14  
15 Ethel Burns

16 Oxford Brookes University

17 Corresponding author: [eburns@brookes.ac.uk](mailto:eburns@brookes.ac.uk)  
18  
19

20  
21  
22 Claire Feely

23 Oxford Brookes University

24  
25  
26 Priscilla Hall, PhD, CNM

27 Emory University School of Nursing  
28  
29

30  
31  
32 Jennifer Vanderlaan, PhD, MPH, CNM

33 University of Nevada Las Vegas School of Nursing  
34  
35  
36  
37  
38  
39  
40  
41  
42  
43  
44  
45  
46  
47  
48  
49  
50  
51  
52  
53  
54  
55  
56  
57  
58  
59  
60



## Abstract

### Objectives:

Water immersion during labour using a birth pool to achieve relaxation and pain relief during the first and possibly part of the second stage of labour is an increasingly popular care option in several countries. It is used particularly by healthy women who experience a straightforward pregnancy, labour spontaneously at term gestation, and plan to give birth in a midwifery led care setting. More women are also choosing to give birth in water. There is debate about the safety of intrapartum water immersion, particularly waterbirth. We synthesised the evidence that compared the effect of water immersion during labour or waterbirth on intrapartum interventions and outcomes to standard care with no water immersion. A secondary objective was to synthesise data relating to clinical care practices and birth settings that women experience who immerse in water and women who do not.

### Design: Systematic Review and Meta-Analysis

**Data sources** A search was conducted using CINAHL, Medline, Embase, BioMed Central (BMC) and PsycInfo during March 2020 and was replicated in May 2021.

**Eligibility criteria for selecting studies:** Primary quantitative studies published in 2000 or later, examining maternal or neonatal interventions and outcomes using the birthing pool of labour and/or birth.

**Data extraction and synthesis** Full text screening was undertaken independently against inclusion/exclusion criteria in two pairs. Risk of bias assessment included review of 7 domains based on the Robbins-I Risk of Bias Tool. All outcomes were summarised using an odds ratio (OR) and 95% confidence interval (CI). All calculations were conducted in Comprehensive Meta-Analysis Version 3, using the inverse variance method. Results of individual studies were converted to log odds ratio and standard error for synthesis. Fixed effects models were used when  $I^2$  was less than 50%, otherwise random effects models were used. The fail-safe N estimates were calculated to determine the number of studies necessary to change the estimates. Begg's Test and Egger's Regression Risk assessed risk of bias

1  
2  
3 across studies. Trim & Fill analysis was used to estimate the magnitude of effect of the bias. Meta-  
4  
5 regression was completed when at least ten studies provided data for an outcome  
6  
7

8  
9 **Results:** We included 36 studies in the review, (N=157,546 participants). Thirty-one studies were  
10  
11 conducted in an obstetric unit setting (n=70,393), four studies were conducted in midwife led settings  
12  
13 (n=61,385) and one study was a mixed setting (OU and homebirth) (n=25,768). Midwife led settings  
14  
15 included planned home and freestanding midwifery unit (k=1), alongside midwifery units (k=1), planned  
16  
17 homebirth (k=1), a freestanding midwifery unit and an alongside midwifery unit (k=1), and an alongside  
18  
19 midwifery unit (k=1). For water immersion, 25 studies involved women who planned to have a waterbirth  
20  
21 (n=151,742), seven involved water immersion for labour only (1,901), three studies reported on water  
22  
23 immersion during labour and waterbirth (n=3,688) and one study was unclear about the timing of water  
24  
25 immersion (n=215).  
26  
27

28 Water immersion significantly reduced use of epidural (k=7, n=10,993; OR 0.17 95% CI 0.05 – 0.56),  
29  
30 injected opioids (k=8, n=27,391; OR 0.22 95% CI 0.13 – 0.38), episiotomy (k=15, n=36,558; OR 0.16;  
31  
32 95% CI 0.10 – 0.27), maternal pain (k=8, n=1,200; OR 0.24 95% CI 0.12 – 0.51), and postpartum  
33  
34 hemorrhage (k=15, n=63891; OR 0.69 95% CI 0.51 – 0.95). There was an increase in maternal  
35  
36 satisfaction (k=6, n=4,144; OR 1.95 95% CI 1.28 – 2.96) and odds of an intact perineum (k=17, n=59070;  
37  
38 OR 1.48; 95% CI 1.21 – 1.79) with water immersion. Waterbirth was associated with increased odds of  
39  
40 cord avulsion (OR 1.94 95% CI 1.30 – 2.88), although the absolute risk remained low (4.3 per 1,000 vs  
41  
42 1.3 per 1,000). There were no differences in any other identified neonatal outcomes.  
43  
44  
45  
46

47 **Conclusions:** This review endorses previous reviews showing clear benefits resulting from intrapartum  
48  
49 water immersion for healthy women and their newborns. While most included studies were conducted in  
50  
51 obstetric units, to enable the identification of best practice regarding water immersion, future birthing  
52  
53 pool research should integrate factors that are known to influence intrapartum interventions and  
54  
55 outcomes. These include maternal parity, the care model, care practices and birth setting.  
56  
57  
58  
59

1  
2  
3 **Registration:** PROSPERO 2019 CRD42019147001 Revised July 2020

4 [https://www.crd.york.ac.uk/prospero/display\\_record.php?RecordID=147001&VersionID=13686](https://www.crd.york.ac.uk/prospero/display_record.php?RecordID=147001&VersionID=13686)  
5 [97](#)  
6  
7  
8  
9

### 10 **Strengths and Limitations of the Study**

- 11 ● This study incorporated meta-regression, using covariates identified a priori, to identify sources
- 12 of heterogeneity in previous studies.
- 13 ● This study included cumulative meta-analysis and fail-safe analysis to provide estimates of the
- 14 stability of the findings
- 15 ● Inconsistency of reporting on birth setting, care practices, interventions and outcomes prevented
- 16 us from achieving our secondary objective to account for intrapartum care variation.
- 17 ● Meta-regression was only possible for three outcomes: intact perineum, episiotomy and
- 18 postpartum haemorrhage.
- 19 ● Few studies were conducted in midwifery-led settings.  
20  
21  
22  
23  
24  
25  
26

### 27 **Funding Statement**

28 This work was supported by Oxford Brookes University.  
29  
30  
31  
32  
33

### 34 **Author Contributions**

35 EB: conceptualisation, protocol writing, investigation, methodology, writing-original draft, writing-  
36 review and editing, project administration, funding acquisition for Open Access publication.  
37 Dr Ethel Burns, Senior Midwifery Lecturer, Midwifery research Lead, Oxford Brookes University,  
38 Oxford UK  
39

40 CF<sub>1</sub>: methodology, protocol writing, validation, writing-original draft, writing- review and editing,  
41 visualisation.  
42 Dr Claire Feeley, Midwife Researcher, Associate Lecturer, Oxford Brookes University, Oxford UK.  
43  
44

45 PH: conceptualisation, investigation, writing - original draft, writing – review and editing  
46 Dr Priscilla Hall, Midwife Researcher and Senior Instructor, Emory University in the Nell Hodgson  
47 Woodruff School of Nursing, Atlanta, Georgia USA  
48  
49

50 JV: conceptualisation, methodology, investigation, data curation, formal analysis, writing – original draft,  
51 writing – review and editing, visualisation.  
52 Assistant Professor Jennifer Vanderlaan, University of Nevada, Las Vegas School of Nursing, Nevada  
53 USA  
54  
55  
56  
57  
58  
59  
60

### Scientific Advisers

VF: Methodology, validation & Investigation

Vicki Farmilo, Health care librarian, Oxford Brookes University, Oxford, UK

RM: Methodology, Review.

Dr Reem Malouf, Neurologist, Specialist in Internal Medicine, National Perinatal Epidemiology Units, Oxford UK

Cindy Farley (CF<sub>2</sub>): Methodology, Investigation, Review

Associate Professor, Georgetown University, Washington DC, USA

HC: Validation, Review

Dr Harriet Thorn-Cole, Scientific CoLLabourator, University of Health Sciences of Western Switzerland, Lausanne, Switzerland.

CR: Methodology, Review

Dr Charles Roehr, National Perinatal Epidemiology Unit Clinical Trials Unit, Oxford UK.

Academic Consultant Neonatologist, Newborn Services, Southmead Hospital, North Bristol Trust, Bristol.

Research Ethics Approval

No patient involvement

### Funding

This research received no specific grant for funding from any agency in the public, commercial or not-for-profit sectors

### Competing Interests

There were no competing interests

### Data Sharing Statement

No data-sharing agreement was required for this research.

## Introduction

Immersion in a birthing pool offers women a non-pharmacological option of pain relief during labour, which also enhances their sense of control. Resting and labouring in water can reduce fear, anxiety and pain perception; it helps optimise the physiology of childbirth through the release of endogenous endorphins and oxytocin. Evidence from randomised controlled trials (RCTs) showed that labouring in water reduces the need for epidural analgesia whilst identifying no adverse maternal or neonatal effects.<sup>1</sup> In the UK, most birthing pool use occurs in midwifery-led birth settings: these include alongside midwifery units (co-located with a maternity hospital setting) and freestanding midwifery units (FMU) (in the community setting) and home birth.<sup>2</sup> The outcomes of birthing pool use may be different in midwifery-led settings compared to an obstetric setting because healthy women experience fewer interventions and operative birth when the birth occurs in a midwifery-led setting compared to an obstetric setting.<sup>3</sup>

Variations in care between waterbirth services may contribute to the differences in outcomes with water immersion, particularly variations in use of labour augmentation, hands on/off the perineum for the birth, pushing position, use of active management of third stage of labour, and placenta birth in the water.<sup>3-9</sup> It is likely that woman who use water immersion for labour and birth experience different care practices than women who have standard birth care. Though prior evidence has found no increased risk of adverse events for newborns born in water, heterogeneity in outcomes and limited reporting of the clinical guidance used for water immersion make implementation of evidence-based guidelines difficult.<sup>10-12</sup> There is a need to understand which clinical practices, when performed as part of water immersion care, result in the optimum outcomes for mother and newborn. It has been argued that an international RCT would be desirable.<sup>13,14</sup> However, a RCT proposal is likely to encounter ethical and recruitment challenges due to increasing acknowledgment of the importance of enabling women to take an active part in decision-making during labour. Additionally, an unblinded trial and expected uneven crossover carry an inevitable limitation.<sup>15</sup>

1  
2  
3 Water immersion in a birth pool during labour and birth can be divided into two distinct but overlapping  
4 categories. Water immersion during labour involves using a birth pool to achieve relaxation and pain  
5 relief during the first and possibly part of the second stage of labour but exiting the pool for the birth.  
6  
7 With this practice, the infant emerges into air to breathe. With waterbirth, the woman remains in the birth  
8 pool for the birth of the baby. The infant emerges into the water and is brought to the surface to initiate  
9 breathing.  
10  
11

12  
13  
14  
15  
16 The primary objective of this systematic review was to compare intrapartum interventions and outcomes  
17 for water immersion during labour/waterbirth to standard care with no water immersion. The secondary  
18 objective was to analyse data reported for clinical care practices and birth settings experienced by women  
19 who use water and women who do not.  
20  
21  
22

#### 23 *Review questions*

24  
25  
26 What interventions do women experience with water immersion for labour and birth?  
27

28  
29 What are the maternal and newborn outcomes following water immersion during labour and waterbirth  
30 compared with similar women who labour and/or give birth on land?  
31  
32

#### 33 **Methods**

34  
35 A protocol for the review was published in the International Prospective Register of Systematic  
36 Reviews PROSPERO2019 CRD42019147001 prior to completion of the searches. The PRISMA  
37 2020 guideline was followed for conducting this work.<sup>16</sup> Institutional Review Board approval  
38 was not sought as Institutional Review Board approval was not sought as meta-analyses are not  
39 human subjects research.  
40  
41  
42  
43  
44

#### 45 **Patient and Public Involvement**

46  
47 Patients were not involved in the development of the research question, study design, or selection of  
48 outcome measures  
49  
50

51 Eligibility criteria included:  
52  
53  
54  
55  
56  
57  
58  
59  
60

- 1) Studies using any primary quantitative study design published in peer-reviewed journal or unpublished thesis.
- 2) Studies that examined maternal or neonatal interventions and/or outcomes when using the birthing pool for labour and/or birth.
- 3) Studies published in 2000 or later
- 4) Studies conducted in any language if it could be translated into English using Google Translate.

A search was conducted using CINAHL, Medline, Embase, BioMed Central (BMC) and PsycInfo during March 2020. The search was replicated in May 2021. A predesigned search strategy was designed using the PICOT/PEOT framework to develop search terms:<sup>17</sup>

- Population: women in labour and early postpartum
- Exposure: water immersion during labour and/or birth
- Comparison: no water immersion during labour or birth
- Outcomes: *Maternal*: artificial rupture of the membranes, need for labour augmentation, epidural analgesia, opioid injection, planned and actual place of birth, reason for transfer to an obstetric setting, mode of birth, perineal trauma, third stage management, postpartum haemorrhage/blood transfusion, infection, breastfeeding initiation. *Newborn*: APGAR score, resuscitation, admission to a neonatal intensive care unit (NICU), infection, breastfeeding at 6 weeks
- Time: labour and early puerperium

A tested, sensitive, and reproducible search strategy was developed with the specialist healthcare librarian, VF.<sup>18</sup> The refined search terms and strategy with Boolean operators are provided in Supplement 1. These were adapted for specific database architecture. Additional searches were carried out via referencing, checking all included studies with no further records found. Publication alerts were set up via BMC updates that alerted CF<sub>1</sub> to a new publication that met our inclusion/exclusion criteria. A final search to determine if any additional papers were published after analysis was conducted by VF in May 2021.

### *Study selection*

1  
2  
3 Records were de-duplicated in Zotero and collated into Rayyan systematic review software.<sup>19</sup>  
4  
5 Initial screening (title/abstract) was carried out blind by HTC, CF<sub>1</sub>, CF<sub>2</sub> against the inclusion/exclusion  
6  
7 criteria. Consensus meetings were held to discuss and resolve disagreements. Full text screening was  
8  
9 carried out independently against the inclusion/exclusions criteria and in pairs: JV and CF<sub>1</sub>, EB and PH.  
10  
11 Disagreements were resolved by consensus meeting. In the case of duplication of a sample across  
12  
13 multiple papers, the paper which provided the largest sample for each outcome provided the data for  
14  
15 synthesis.

### 16 17 *Data Collection Process & Data Items*

18  
19  
20 Data collection was completed using pilot tested forms created in REDCap data collection  
21  
22 software. Researchers worked in teams of two (JV and EB, JV and PH) to individually abstract data for  
23  
24 each study, identify discrepancies, and reach consensus when needed. Data collected included the study  
25  
26 type; sample characteristics, care practices for water immersion, if it was a midwifery-led setting; rates of  
27  
28 interventions including amniotomy, labour induction, augmentation, fetal monitoring, epidural, injected  
29  
30 opioid, episiotomy, and active management of third stage; and outcome data including mode of birth,  
31  
32 level of pain, maternal satisfaction, intact perineum, obstetric anal sphincter injury, shoulder dystocia,  
33  
34 maternal infection defined by symptoms and positive test, primary postpartum haemorrhage, manual  
35  
36 removal of the placenta, 5-minute APGAR, newborn resuscitation, transient tachypnoea of the newborn,  
37  
38 respiratory distress of the newborn, neonatal intensive unit admission within the first 24 hours and lasting  
39  
40 for 48 hours, death in neonatal period, newborn infection defined by both symptoms and positive test,  
41  
42 cord avulsion, and breastfeeding initiation.

### 43 44 *Risk of bias assessment*

45  
46  
47 Risk of bias assessment included review of 7 domains based on the Robbins-I Risk of Bias  
48  
49 Tool.<sup>20</sup> The domains included bias due to confounding, bias in selection of participants, bias in  
50  
51 measurement of intervention, bias due to departures of intended treatment, bias in measurement of  
52  
53 outcomes, bias due to missing data, bias in selection of reported results. Bias due to departure of intended  
54  
55 treatment was modified to track studies that did not provide information about water immersion use for  
56  
57



1  
2  
3 the control group. Risk of bias assessment was completed independently by two researchers (JV and EB,  
4 JV and PH). Disagreements were resolved by consensus meeting.

### 7 *Summary Measures & Synthesis of Results*

9 All outcomes were summarized using an odds ratio (OR) and 95% confidence interval (CI). All  
10 calculations were conducted in Comprehensive Meta-Analysis Version 3, using the inverse variance  
11 method.<sup>21</sup> Results of individual studies were converted to log odds ratio and standard error for synthesis.  
12 Fixed effects models were used when  $I^2$  was less than 50%, otherwise random effects models were used.  
13 This decision was made because 1) the population eligible for water immersion is restricted to women at  
14 low risk of birth complications and 2) the goal of the analysis was to determine if variations in care  
15 practices result in changes in outcomes. Outcomes without adequate heterogeneity in estimates were  
16 considered unlikely to be affected by care practices and so a fixed effects model was appropriate for  
17 analysis. When possible, subgroup analysis was conducted to determine effect of the birth setting and  
18 parity on the estimate. In addition, analysis limited to studies published within the past 10 years was  
19 conducted when possible. Per protocol, we intended to conduct subgroup analysis by maternal age,  
20 maternal BMI, prior caesarean, and pool type, however the data did not allow for these analyses.  
21 Cumulative meta-analysis was used to identify the stability of the estimates over time.<sup>22</sup> The fail-safe N  
22 estimates was calculated to determine the number of studies necessary to change the estimates.<sup>23</sup> Forest  
23 plots were created in RevMan v5.4.1.<sup>24</sup>

### 34 *Additional Analyses*

35 Begg's Test and Egger's Regression Risk assessed risk of bias across studies.<sup>25</sup> Trim & Fill  
36 analysis was used to estimate the magnitude of effect of the bias.<sup>26</sup> Meta-regression was completed when  
37 at least ten studies provided data for an outcome when  $I^2 > 50\%$ .<sup>26-28</sup> Tested covariates included the sample  
38 characteristics and care practices identified a priori as the structure and process variables likely to be  
39 responsible for heterogeneity in the outcomes. Directed acyclic graphs (DAG) of the covariates and their  
40 role are available in Supplement 2.<sup>29</sup> For continuous covariates, the rate of a covariate (e.g. the induction  
41  
42  
43  
44  
45  
46  
47  
48  
49  
50  
51  
52  
53  
54  
55  
56  
57  
58  
59  
60

1  
2  
3 rate in the sample) were used for regression. Categorical covariates were coded as dichotomous (e.g.  
4 described appropriate birth pool or did not describe the immersion receptacle).

### 7 *Certainty Assessment*

9 The fail-safe N estimates was calculated to determine the number of studies necessary to change the  
10 estimates.<sup>23</sup> Fail-safe calculates the number of studies needed to change the estimate. Cumulative meta-  
11 analysis was used to identify the stability of the estimates over time.<sup>22</sup> Assessment of certainty with  
12 GRADE criteria was considered inappropriate for this review because the goal of this study was to  
13 identify variations between reports of outcomes with water immersion that contribute to inconsistency,  
14 imprecision, variations, and confounding – three assessments made when considering certainty of  
15 evidence. However, the authors recognise the importance of a standardised GRADE assessment for  
16 readers. The individual assessments made in this review were prepared in a table outlining scores per  
17 standard Grade criteria as supplement 3.

## 28 **Results**

### 30 *Study Selection*

32 The searches generated 2,113 hits, reduced to 1,667 after duplicates were removed; n=1,561  
33 records were discarded at the initial screening stage. Of 106 records that were full-text screened, n=71  
34 records did not meet the criteria. See Supplement 4 for the list of excluded studies and the reasons. One  
35 additional study was found via BMC updates, therefore, k=36 papers reporting on outcomes for 153,236  
36 women were included into the review.<sup>30-66</sup> Figure 1 PRISMA diagram illustrates the study selection  
37 process.<sup>16</sup>

45 [Insert Figure 1 Here]

### 47 *Study Description*

49 Most studies (k=32) were conducted in an obstetric setting or did not adequately report the  
50 setting, while four studies were conducted in midwife-led settings; two included planned home and birth  
51 centre births 4, 29, one that involved a birth centre (not explicitly described as freestanding) and an  
52 alongside midwifery unit (co-located in an obstetric unit)<sup>32</sup>. Studies included randomised controlled trials

1  
2  
3 (k=7; n=2,666), prospective studies (k=13; n=30,085), retrospective studies (k=15; n=120,474), and one  
4  
5 pre-post study (n=11). Studies reported on waterbirth (k=25; n=146,499), water immersion for labour  
6  
7 (k=7; n=1,901), both (k=3; n=4,621) and one whose timing of immersion could not be determined  
8  
9 (n=215). Full information is available in Table 1.  
10  
11  
12  
13  
14  
15  
16  
17  
18  
19  
20  
21  
22  
23  
24  
25  
26  
27  
28  
29  
30  
31  
32  
33  
34  
35  
36  
37  
38  
39  
40  
41  
42  
43  
44  
45  
46  
47  
48  
49  
50  
51  
52  
53  
54  
55  
56  
57  
58  
59  
60

For peer review only

Table 1: Characteristics of included studies; Meta-analysis of water immersion for labour and birth

| <b>Author</b>      | <b>Study Type</b> | <b>Setting</b> | <b>Immersion Exposure</b> | <b>Sample Size</b> | <b>Interventions and Outcomes Reported</b> |
|--------------------|-------------------|----------------|---------------------------|--------------------|--------------------------------------------|
| Bailey, 2019       | RCT               | Obstetric      | Waterbirth                | 2,422              | 1, 5, 10, 11, 13, 17                       |
| Barry, 2020        | PO                | Obstetric      | Both                      | 380                | 8, 10, 11, 13, 17, 23                      |
| Benfield, 2010     | Pre-Post          | Obstetric      | Labor                     | 11                 | 4, 7                                       |
| Bovbjerg, 2016     | RO                | Midwifery      | Waterbirth                | 18,355             | 10, 11, 12, 17, 21                         |
| Cluett, 2004       | RCT               | Obstetric      | Labor                     | 99                 | 2, 6, 7, 8, 15, 16                         |
| da Silva, 2009     | RCT               | Obstetric      | Labor                     | 108                | 2, 4, 7, 10, 12, 17                        |
| Eckert, 2001       | RCT               | Obstetric      | Labor                     | 274                | 1, 5, 6, 7, 8, 11, 12, 16, 17, 18          |
| Geissbuehler, 2002 | PO                | Obstetric      | Waterbirth                | 5,584              | 12, 20                                     |
| Geissbuehler, 2004 | PO                | Obstetric      | Waterbirth                | 9,518              | 5, 9, 10, 11, 13, 15, 17                   |
| Geissbuehler, 2000 | PO                | Obstetric      | Waterbirth                | 7,508              | 6, 16                                      |
| Haslinger, 2015    | RO                | Obstetric      | Waterbirth                | 7,832              | 11, 12                                     |
| Henderson, 2014    | PO                | Obstetric      | Both                      | 3,078              | 2, 3, 8, 10, 12, 13, 14, 18                |
| Hodgson, 2020      | RO                | Mixed          | Waterbirth                | 25,768             | 4, 11, 17, 18                              |
| Jacoby, 2019       | RO                | Obstetric      | Waterbirth                | 23,036             | 11, 13, 15, 17, 18, 20, 21, 23             |
| Lathrop, 2018      | PO                | Obstetric      | Waterbirth                | 198                | 13, 16                                     |
| Lim, 2016          | RO                | Obstetric      | Waterbirth                | 236                | 4, 9, 10, 12, 13, 14, 17, 19               |
| Liu, 2014          | PO                | Obstetric      | Labor                     | 108                | 4, 7, 8, 13                                |
| Mallen-Perez, 2018 | PO                | Obstetric      | Unclear                   | 215                | 7                                          |

|    |                          |     |           |            |        |                                                   |
|----|--------------------------|-----|-----------|------------|--------|---------------------------------------------------|
| 1  |                          |     |           |            |        |                                                   |
| 2  |                          |     |           |            |        |                                                   |
| 3  | Menakaya, 2013           | RO  | Obstetric | Waterbirth | 438    | 9, 10, 11, 12, 13, 17, 18                         |
| 4  |                          |     |           |            |        |                                                   |
| 5  | Mollamahmutoglu, 2012    | PO  | Obstetric | Waterbirth | 602    | 1, 7, 10, 12, 13                                  |
| 6  |                          |     |           |            |        |                                                   |
| 7  | Neiman, 2020             | RO  | Obstetric | Both       | 230    | 4, 8, 9, 10, 12, 13, 17, 22, 23                   |
| 8  |                          |     |           |            |        |                                                   |
| 9  | Ohlsson, 2001            | RCT | Obstetric | Labor      | 1,237  | 6, 8, 11, 14, 19, 20                              |
| 10 |                          |     |           |            |        |                                                   |
| 11 | Otigbah, 2000            | RO  | Obstetric | Waterbirth | 602    | 1, 4, 5, 9, 10, 11, 12, 13                        |
| 12 |                          |     |           |            |        |                                                   |
| 13 | Pagano, 2010             | RO  | Obstetric | Waterbirth | 220    | 10, 17                                            |
| 14 |                          |     |           |            |        |                                                   |
| 15 | Peacock, 2018            | RO  | Obstetric | Waterbirth | 3,507  | 17                                                |
| 16 |                          |     |           |            |        |                                                   |
| 17 | Preston, 2019            | RO  | Midwifery | Waterbirth | 15,734 | 5, 9, 11                                          |
| 18 |                          |     |           |            |        |                                                   |
| 19 | Ros, 2009                | PO  | Obstetric | Waterbirth | 54     | 17                                                |
| 20 |                          |     |           |            |        |                                                   |
| 21 | Sert, 2019               | RCT | Obstetric | Labor      | 64     | 17                                                |
| 22 |                          |     |           |            |        |                                                   |
| 23 | Snapp, 2019              | RO  | Midwifery | Waterbirth | 26,684 | 9, 10, 13, 17, 21, 23                             |
| 24 |                          |     |           |            |        |                                                   |
| 25 | Thoeni, 2005             | RO  | Obstetric | Waterbirth | 1,600  | 10, 11, 12                                        |
| 26 |                          |     |           |            |        |                                                   |
| 27 | Torkamani, 2010          | PO  | Obstetric | Waterbirth | 100    | 5, 7, 12                                          |
| 28 |                          |     |           |            |        |                                                   |
| 29 | Ulfsdottir, 2018         | RO  | Midwifery | Waterbirth | 612    | 1, 2, 3, 4, 6, 10, 11, 12, 13, 14, 16, 17, 23, 24 |
| 30 |                          |     |           |            |        |                                                   |
| 31 | Woodward, 2004           | RCT | Obstetric | Waterbirth | 80     | 4, 5, 6, 8, 10, 17, 24                            |
| 32 |                          |     |           |            |        |                                                   |
| 33 | Zanetti-Dallenbach, 2006 | PO  | Obstetric | Waterbirth | 513    | 2, 3, 6, 9, 12                                    |
| 34 |                          |     |           |            |        |                                                   |
| 35 | Zanetti-Dallenbach, 2007 | PO  | Obstetric | Waterbirth | 368    | 4, 5, 10, 11, 13, 14, 17                          |
| 36 |                          |     |           |            |        |                                                   |
| 37 | Ziolkowski, 2009         | RO  | Obstetric | Waterbirth | 171    | 16, 17                                            |

34 Study Type Key: RCT, Randomised Controlled Trial; PO, Prospective Observational; RO, Retrospective Observational

36 Interventions & Outcomes Key: 1) Labour Induction 2) Amniotomy 3) Augmentation 4) Fetal Monitoring 5) Opioids 6) Epidural 7) Pain 8) Cesarean Delivery 9) Shoulder Dystocia 10) Intact Perineum 11) OASI 12) Episiotomy 13) Postpartum Hemorrhage 14)

1  
2  
3 Manual Removal of Placenta 15) Maternal Infection 16) Maternal Satisfaction 17) 5-Minute APGAR 18) Newborn Resuscitation 19)  
4  
5 Transient Tachypnea of the Newborn 20) Respiratory Distress of the Newborn 21) Neonatal Death 22) Infection in newborn period  
6  
7  
8 23) Cord Avulsion 24) Breastfeeding Initiation  
9

10 No studies provided comparison data for third stage management.  
11

12 No studies met the definition used for neonatal intensive care unit admission.  
13  
14  
15  
16  
17  
18  
19  
20  
21  
22  
23  
24  
25  
26  
27  
28  
29  
30  
31  
32  
33  
34  
35  
36  
37  
38  
39  
40  
41  
42  
43  
44  
45  
46  
47

1  
2  
3 Few studies provided sample characteristics beyond parity (See Table 2). Eleven studies reported  
4 the sample was restricted to persons in spontaneous Labour while seven included the rate of labour  
5 induction for each group. Two studies excluded participation based on BMI while six provided weight or  
6 BMI distributions in the sample characteristics. Most studies (k=19; n=77,180) excluded multiple  
7 pregnancies, the rest did not address this characteristic. Prior caesarean was excluded by seven studies  
8 (n=2,292) and reported as a sample characteristic for five studies (n=22,439).  
9  
10  
11  
12  
13  
14  
15  
16  
17  
18  
19  
20  
21  
22  
23  
24  
25  
26  
27  
28  
29  
30  
31  
32  
33  
34  
35  
36  
37  
38  
39  
40  
41  
42  
43  
44  
45  
46  
47  
48  
49  
50  
51  
52  
53  
54  
55  
56  
57  
58  
59  
60

For peer review only

Table 2: Reported characteristics of study samples abstracted from inclusion and exclusion criteria or sample descriptions

| <b>Author</b>      | <b>Excludes Multiparous</b> | <b>Excludes Induced Labour</b> | <b>Excludes for BMI</b> | <b>Excludes Multiples</b> | <b>Excludes Prior Cesarean</b> |
|--------------------|-----------------------------|--------------------------------|-------------------------|---------------------------|--------------------------------|
| Bailey, 2019       | Yes                         | No                             | No                      | Yes                       | No                             |
| Barry, 2020        | Yes                         | Yes                            | >30                     | Yes                       | n.d.                           |
| Benfield, 2010     | Yes                         | n.d.                           | n.d.                    | n.d.                      | n.d.                           |
| Bovbjerg, 2016     | Yes                         | n.d.                           | n.d.                    | Yes                       | No                             |
| Cluett, 2004       | Yes                         | Yes                            | n.d.                    | n.d.                      | n.d.                           |
| da Silva, 2009     | Yes                         | n.d.                           | n.d.                    | Yes                       | n.d.                           |
| Eckert, 2001       | Yes                         | No                             | n.d.                    | Yes                       | n.d.                           |
| Geisbuehler, 2002  | Yes                         | n.d.                           | n.d.                    | n.d.                      | n.d.                           |
| Geissbuehler, 2004 | Yes                         | n.d.                           | >40                     | n.d.                      | n.d.                           |
| Geissbuehler, 2000 | Yes                         | n.d.                           | n.d.                    | n.d.                      | n.d.                           |
| Haslinger, 2015    | Yes                         | n.d.                           | n.d.                    | Yes                       | n.d.                           |
| Henderson, 2014    | Yes                         | No                             | n.d.                    | n.d.                      | No                             |
| Hodgson, 2020      | Yes                         | n.d.                           | n.d.                    | Yes                       | n.d.                           |
| Jacoby, 2019       | Yes                         | Yes                            | n.d.                    | Yes                       | n.d.                           |
| Lathrop, 2018      | Yes                         | n.d.                           | n.d.                    | Yes                       | n.d.                           |
| Lim, 2016          | Yes                         | n.d.                           | n.d.                    | Yes                       | No                             |
| Liu, 2014          | No                          | n.d.                           | No                      | Yes                       | Yes                            |
| Mallen-Perez, 2018 | Yes                         | Yes                            | No                      | Yes                       | n.d.                           |



1  
2  
3  
4  
5  
6  
7  
8  
9  
10  
11  
12  
13  
14  
15  
16  
17  
18  
19  
20  
21  
22  
23  
24  
25  
26  
27  
28  
29  
30  
31  
32  
33  
34  
35  
36  
37  
38  
39  
40  
41  
42  
43  
44  
45  
46  
47

|                          |     |      |      |      |      |
|--------------------------|-----|------|------|------|------|
| Menakaya, 2013           | Yes | Yes  | n.d. | Yes  | n.d. |
| Mollamahmutoglu, 2012    | Yes | No   | No   | n.d. | Yes  |
| Neiman, 2020             | Yes | Yes  | n.d. | Yes  | Yes  |
| Ohlsson, 2001            | Yes | n.d. | n.d. | Yes  | n.d. |
| Otigbah, 2000            | Yes | No   | n.d. | n.d. | n.d. |
| Pagano, 2010             | Yes | n.d. | n.d. | n.d. | n.d. |
| Peacock, 2018            | Yes | Yes  | n.d. | n.d. | n.d. |
| Preston, 2019            | Yes | Yes  | No   | n.d. | n.d. |
| Ros, 2009                | Yes | n.d. | n.d. | Yes  | Yes  |
| Sert, 2019               | Yes | Yes  | n.d. | n.d. | Yes  |
| Snapp, 2019              | Yes | n.d. | n.d. | n.d. | n.d. |
| Thoeni, 2005             | No  | n.d. | n.d. | Yes  | Yes  |
| Torkamani, 2010          | Yes | n.d. | n.d. | n.d. | n.d. |
| Ulfsdottir, 2018         | Yes | Yes  | No   | n.d. | No   |
| Woodward, 2004           | Yes | Yes  | n.d. | n.d. | Yes  |
| Zanetti-Dallenbach, 2006 | Yes | n.d. | n.d. | Yes  | n.d. |
| Zanetti-Dallenbach, 2007 | Yes | n.d. | n.d. | Yes  | n.d. |
| Ziolkowski, 2009         | No  | n.d. | n.d. | n.d. | n.d. |

n.d. This item was not described in the paper; it was neither listed as an inclusion/exclusion criteria nor in the description of the sample.

1  
2  
3 Few studies provided descriptions of the care practices used with water immersion and water  
4 birth (See Table 3). The description of the immersion receptacle used was adequate to determine the  
5 woman had freedom of movement in seven studies (n=3,273). Method of induction was not reported.  
6  
7 Sixteen studies reported a fetal heart monitoring method as either intermittent auscultation (k=10;  
8 n=50,846), continuous monitoring (k=5; n=967) or a mix of methods (k=1; n=367). Six studies reported  
9 using “hands-off” (k=4; n=5,595) or “hands-on” (k=2; n=6,463) the perineum. Third stage management  
10 was reported by six studies (n=5,595), all indicating that active management was used. Three studies  
11 indicated whether the placenta and membranes were delivered in the birth pool (k=1; n=513) or out of the  
12 birth pool (k=2; n=1,396).  
13  
14  
15  
16  
17  
18  
19  
20  
21  
22  
23  
24  
25  
26  
27  
28  
29  
30  
31  
32  
33  
34  
35  
36  
37  
38  
39  
40  
41  
42  
43  
44  
45  
46  
47  
48  
49  
50  
51  
52  
53  
54  
55  
56  
57  
58  
59  
60

1  
2  
3  
4  
5  
6  
7  
8  
9  
10  
11  
12  
13  
14  
15  
16  
17  
18  
19  
20  
21  
22  
23  
24  
25  
26  
27  
28  
29  
30  
31  
32  
33  
34  
35  
36  
37  
38  
39  
40  
41  
42  
43  
44  
45  
46  
47

Table 3: Description of care practices reported in included studies

| <b>Author</b>      | <b>Appropriate Pool Described</b> | <b>Induction Method</b> | <b>Intermittent Auscultation</b> | <b>Perineum Method</b> | <b>3<sup>rd</sup> Stage Management</b> | <b>Placenta &amp; Membranes</b> |
|--------------------|-----------------------------------|-------------------------|----------------------------------|------------------------|----------------------------------------|---------------------------------|
| Bailey, 2019       | No                                | n.d.                    | n.d.                             | n.d.                   | Active                                 | Out of Pool                     |
| Barry, 2020        | Yes                               | None                    | Mixed                            | Hands Off              | Active                                 | n.d.                            |
| Benfield, 2010     | No                                | n.d.                    | No                               | n.d.                   | n.d.                                   | n.d.                            |
| Bovbjerg, 2016     | No                                | n.d.                    | n.d.                             | n.d.                   | n.d.                                   | n.d.                            |
| Cluett, 2004       | Yes                               | None                    | n.d.                             | n.d.                   | n.d.                                   | n.d.                            |
| da Silva, 2009     | No                                | n.d.                    | No                               | n.d.                   | n.d.                                   | n.d.                            |
| Eckert, 2001       | Yes                               | n.d.                    | n.d.                             | n.d.                   | n.d.                                   | n.d.                            |
| Geissbuehler, 2002 | No                                | n.d.                    | Yes                              | n.d.                   | n.d.                                   | n.d.                            |
| Geissbuehler, 2004 | No                                | n.d.                    | Yes                              | n.d.                   | n.d.                                   | n.d.                            |
| Geissbuehler, 2000 | No                                | n.d.                    | Yes                              | n.d.                   | n.d.                                   | n.d.                            |
| Haslinger, 2015    | No                                | n.d.                    | n.d.                             | Hands On               | n.d.                                   | n.d.                            |
| Henderson, 2014    | No                                | n.d.                    | n.d.                             | Hands Off              | Active                                 | n.d.                            |
| Hodgson, 2020      | No                                | n.d.                    | Yes                              | n.d.                   | n.d.                                   | n.d.                            |
| Jacoby, 2019       | No                                | None                    | n.d.                             | n.d.                   | n.d.                                   | n.d.                            |
| Lathrop, 2018      | No                                | n.d.                    | n.d.                             | n.d.                   | n.d.                                   | n.d.                            |
| Lim, 2016          | No                                | n.d.                    | No                               | n.d.                   | n.d.                                   | n.d.                            |
| Liu, 2014          | No                                | n.d.                    | Yes                              | n.d.                   | n.d.                                   | n.d.                            |
| Mallen-Perez, 2018 | Yes                               | None                    | n.d.                             | n.d.                   | n.d.                                   | n.d.                            |

|    |                          |     |      |      |           |        |             |
|----|--------------------------|-----|------|------|-----------|--------|-------------|
| 1  |                          |     |      |      |           |        |             |
| 2  |                          |     |      |      |           |        |             |
| 3  | Menakaya, 2013           | Yes | None | n.d. | n.d.      | n.d.   | n.d.        |
| 4  | Mollamahmutoglu, 2012    | Yes | n.d. | Yes  | Hands Off | Active | n.d.        |
| 5  | Neiman, 2020             | No  | None | Yes  | n.d.      | n.d.   | n.d.        |
| 6  | Ohlsson, 2001            | No  | n.d. | n.d. | n.d.      | n.d.   | n.d.        |
| 7  | Otigbah, 2000            | Yes | n.d. | Yes  | Hands Off | Active | Out of Pool |
| 8  | Pagano, 2010             | No  | n.d. | n.d. | n.d.      | n.d.   | n.d.        |
| 9  | Peacock, 2018            | No  | None | n.d. | n.d.      | n.d.   | n.d.        |
| 10 | Preston, 2019            | No  | None | n.d. | n.d.      | n.d.   | n.d.        |
| 11 | Ros, 2009                | No  | n.d. | n.d. | n.d.      | n.d.   | n.d.        |
| 12 | Sert, 2019               | Yes | None | n.d. | n.d.      | n.d.   | n.d.        |
| 13 | Snapp, 2019              | No  | n.d. | n.d. | n.d.      | n.d.   | n.d.        |
| 14 | Thoeni, 2005             | No  | n.d. | n.d. | Hands On  | n.d.   | n.d.        |
| 15 | Torkamani, 2010          | No  | n.d. | n.d. | n.d.      | n.d.   | n.d.        |
| 16 | Ulfsdottir, 2018         | Yes | None | No   | n.d.      | n.d.   | n.d.        |
| 17 | Woodward, 2004           | No  | None | Yes  | n.d.      | n.d.   | n.d.        |
| 18 | Zanetti-Dallenbach, 2006 | No  | n.d. | No   | n.d.      | Active | In Pool     |
| 19 | Zanetti-Dallenbach, 2007 | No  | n.d. | No   | n.d.      | n.d.   | n.d.        |
| 20 | Ziolkowski, 2009         | No  | n.d. | Yes  | n.d.      | n.d.   | n.d.        |

---

n.d. Care practice not described in the paper in methods or results.

### *Risk of Bias Assessment*

Overall risk of bias is presented in Figure 2. Domain 3, bias due to comparability of the groups, was most often identified in retrospective studies that did not provide adequate sample restriction to ensure comparability. Domain 4, bias due to departure from intended treatment, had the highest potential for bias because studies did not provide information about if or why the comparison group included persons who used water in labour but not during birth. Bias in measurement of outcomes was rare because most outcomes were standard medical record items. However, measurement for pain and maternal satisfaction was not consistently described. Individual study results and risk of bias for each outcome are provided in the forest plots found in Figures 3-24.

[Insert Figure 2]

**Labour Induction.** Three studies provided data on labour induction (n=2,008), all conducted after 2010. Overall, this analysis found no difference between use of labour induction with water immersion and standard care (OR 0.43; 95% CI 0.16 – 1.16; random effects; Q=20.7 p<.001; I<sup>2</sup>=90%). Subgroup analysis of studies reporting in an obstetric setting remained no difference. Results of the subgroup analyses are in Table 4. Three studies were too few for cumulative meta-analysis. Two additional studies indicated there was no difference but did not provide data to synthesise.<sup>36,53</sup>

Table 4: Results of subgroup analysis of interventions on outcomes of water immersion for labour and waterbirth compared to standard care.

| Outcome                            | Studies | Sample               | Effect               | Heterogeneity             |
|------------------------------------|---------|----------------------|----------------------|---------------------------|
|                                    |         |                      | OR (95% CI)<br>Model | Q (p)<br>I <sup>2</sup> % |
| <b>Labor Induction<sup>a</sup></b> |         |                      |                      |                           |
| Obstetric Units                    | 2       | 604 Immersion        | 0.32 (0.06 – 1.58)   | 18 (<.01)                 |
|                                    |         | 792 Standard Care    | Random Effects       | 94%                       |
| <b>Amniotomy<sup>a</sup></b>       |         |                      |                      |                           |
| Obstetric Units                    | 4       | 306 Immersion        | 0.95 (0.62 – 1.46)   | 5 (.17)                   |
|                                    |         | 709 Standard Care    | Random Effects       | 40%                       |
| 2010 and Earlier                   | 3       | 192 Immersion        | 0.87 (0.46 – 1.64)   | 4 (.13)                   |
|                                    |         | 250 Standard care    | Random Effects       | 51%                       |
| 2011 and Later                     | 2       | 420 Immersion        | 0.56 (0.15 – 2.02)   | 14 (<.01)                 |
|                                    |         | 765 Standard care    | Random Effects       | 93%                       |
| <b>Augmentation<sup>a</sup></b>    |         |                      |                      |                           |
| Obstetric Units                    | 2       | 203 Immersion        | 0.48 (0.16 – 1.51)   | 6 (.02)                   |
|                                    |         | 605 Standard Care    | Random Effects       | 83%                       |
| 2011 and Later                     | 2       | 420 Immersion        | 0.32 (0.05 – 2.24)   | 19 (<.01)                 |
|                                    |         | 765 Standard care    | Random Effects       | 95%                       |
| <b>Opioid Use</b>                  |         |                      |                      |                           |
| 2010 and Earlier                   | 6       | 4,298 Immersion      | 0.23 (0.08 – 0.70)   | 95 (<.01)                 |
|                                    |         | 6,565 Standard care  | Random Effects       | 95%                       |
| 2011 and Later                     | 2       | 1,641 Immersion      | 0.17 (0.15 – 0.20)   | 0 (.54)                   |
|                                    |         | 14,887 Standard care | Fixed Effects        | 0%                        |
| <b>Epidural<sup>a</sup></b>        |         |                      |                      |                           |
| Obstetric Units                    | 6       | 4,104 Immersion      | 0.26 (0.08 – 0.83)   | 89 (<.01)                 |
|                                    |         | 6,889 Standard Care  | Random Effects       | 94%                       |
| 2010 and Earlier                   | 6       | 4,104 Immersion      | 0.26 (0.08 – 0.83)   | 89 (<.01)                 |
|                                    |         | 6,889 Standard Care  | Random Effects       | 94%                       |
| <b>Pain</b>                        |         |                      |                      |                           |
| 2010 and Earlier                   | 3       | 182 Immersion        | 0.53 (0.27 – 1.03)   | 6 (.05)                   |

|                          |                        |    |                      |                    |             |
|--------------------------|------------------------|----|----------------------|--------------------|-------------|
|                          |                        |    | 188 Standard Care    | Random Effects     | 68%         |
|                          | 2011 and Later         | 5  | 417 Immersion        | 0.15 (0.06 – 0.42) | 48 (<.01)   |
|                          |                        |    | 413 Standard Care    | Random Effects     | 92%         |
| <b>Cesarean Delivery</b> |                        |    |                      |                    |             |
|                          | 2010 and Earlier       | 4  | 790 Immersion        | 1.05 (0.63 – 1.74) | 3 (.43 )    |
|                          |                        |    | 745 Standard Care    | Fixed Effects      | 0%          |
|                          | 2011 and Later         | 4  | 400 Immersion        | 0.84 (0.32 – 2.23) | 6 (.12)     |
|                          |                        |    | 830 Standard Care    | Fixed Effects      | 48%         |
| <b>Shoulder Dystocia</b> |                        |    |                      |                    |             |
|                          | Obstetric Units        | 6  | 5,528 Immersion      | 1.06 (0.64 – 1.74) | 4 (.60)     |
|                          |                        |    | 21,155 Standard Care | Fixed Effects      | 0%          |
|                          | 2010 and Earlier       | 3  | 4,007 Immersion      | 0.88 (0.42 – 1.83) | 2 (.39 )    |
|                          |                        |    | 6,335 Standard Care  | Fixed Effects      | 0%          |
|                          | 2011 and Later         | 4  | 11,773 Immersion     | 0.87 (0.33 – 2.26) | 11 (.01)    |
|                          |                        |    | 31,252 Standard Care | Random Effects     | 73%         |
| <b>Intact Perineum</b>   |                        |    |                      |                    |             |
|                          | Obstetric Units        | 14 | 6,170 Immersion      | 1.55 (1.12 – 2.16) | 147 (<.01)  |
|                          |                        |    | 8,866 Standard care  | Random Effects     | 91%         |
|                          | Midwifery-led Units    | 3  | 17,079 Immersion     | 1.07 (0.91 – 1.26) | 15 (<.01)   |
|                          |                        |    | 23,249 Standard care | Random Effects     | 87%         |
|                          | Nulliparas             | 5  | 1,065 Immersion      | 1.59 (1.01 – 2.50) | 12 (.01)    |
|                          |                        |    | 894 Standard care    | Random Effects     | 68%         |
|                          | Waterbirth vs No Water | 8  | 954 Immersion        | 1.35 (0.67 – 2.72) | 83 (<.01)   |
|                          |                        |    | 1696 Standard care   | Random Effects     | 92%         |
|                          | 2010 and Earlier       | 7  | 4,958 Immersion      | 1.28 (0.90 – 1.82) | 39 (<.01)   |
|                          |                        |    | 6,949 Standard Care  | Random Effects     | 85%         |
|                          | 2011 and Later         | 10 | 18,292 Immersion     | 1.59 (1.22 – 2.07) | 156 (<.01)  |
|                          |                        |    | 28,871 Standard Care | Random Effects     | 94%         |
| <b>OASI</b>              |                        |    |                      |                    |             |
|                          | Obstetric Units        | 13 | 10,720 Immersion     | 0.85 (0.57 – 1.30) | 51 (<.001)) |
|                          |                        |    | 57,870 Standard care | Random Effects     | 77%         |
|                          | Midwifery-led Units    | 2  | 6,827 Immersion      | 0.71 (0.47 – 1.08) | 0 (.527)    |
|                          |                        |    | 10,558 Standard care | Fixed Effects      | 0%          |
|                          | Nulliparas             | 2  | 870 Immersion        | 1.25 (0.42 – 3.71) | 1 (.385)    |

|                                   |    |                      |                    |             |
|-----------------------------------|----|----------------------|--------------------|-------------|
|                                   |    | 540 Standard care    | Fixed Effects      | 0%          |
| Waterbirth vs No Water            | 3  | 408 Immersion        | 0.57 (0.19 – 1.69) | 1 (.681)    |
|                                   |    | 550 Standard care    | Fixed Effects      | 0%          |
| 2010 and Earlier                  | 6  | 5,493 Immersion      | 0.73 (0.58 – 0.91) | 8 (.16)     |
|                                   |    | 7,517 Standard Care  | Fixed Effects      | 37%         |
| 2011 and Later                    | 9  | 13,298 Immersion     | 0.78 (0.48 – 1.28) | 42 (<.01)   |
|                                   |    | 67,382 Standard Care | Random Effects     | 81%         |
| <b>Episiotomy<sup>a</sup></b>     |    |                      |                    |             |
| Obstetric Units                   | 14 | 6177 Immersion       | 0.17 (0.11 – 0.28) | 109 (<.001) |
|                                   |    | 13,548 Standard care | Random Effects     | 88%         |
| Nulliparas                        | 3  | 886 Immersion        | 0.10 (0.02 – 0.60) | 14 (<.001)  |
|                                   |    | 582 Standard care    | Random Effects     | 86%         |
| Waterbirth vs No Water            | 5  | 691 Immersion        | 0.63 (0.02 – 0.20) | 14 (.008)   |
|                                   |    | 1022 Standard care   | Random Effects     | 71%         |
| 2010 and Earlier                  | 7  | 4,927 Immersion      | 0.21 (0.11 – 0.41) | 52 (<.01)   |
|                                   |    | 6,912 Standard Care  | Random Effects     | 88%         |
| 2011 and Later                    | 8  | 7,831 Immersion      | 0.09 (0.03 – 0.25) | 53 (<.01)   |
|                                   |    | 16,888 Standard Care | Random Effects     | 87%         |
| <b>Postpartum Hemorrhage</b>      |    |                      |                    |             |
| Obstetric Units                   | 13 | 7,040 Immersion      | 0.75 (0.60 – 0.94) | 30 (.002)   |
|                                   |    | 29,555 Standard care | Random Effects     | 60%         |
| Midwifery-led Units               | 2  | 10,558 Immersion     | 0.39 (0.08 – 1.86) | 56 (<.001)  |
|                                   |    | 16,738 Standard care | Random Effects     | 98%         |
| Waterbirth vs No Water            | 5  | 758 Immersion        | 1.02 (0.76 – 1.36) | 4 (.439)    |
|                                   |    | 1,177 Standard care  | Fixed Effects      | 0%          |
| 2010 and Earlier                  | 3  | 4,007 Immersion      | 0.72 (0.59 – 0.88) | 2 (.30)     |
|                                   |    | 6,348 Standard Care  | Random Effects     | 17%         |
| 2011 and Later                    | 12 | 13,591 Immersion     | 0.76 (0.48 – 1.20) | 97 (<.01)   |
|                                   |    | 39,945 Standard Care | Random Effects     | 89%         |
| <b>Manual Removal of Placenta</b> |    |                      |                    |             |
| Obstetric Units                   | 4  | 1,239 Immersion      | 0.78 (0.37 – 1.64) | 6 (.105)    |
|                                   |    | 1,654 Standard care  | Fixed Effects      | 51%         |
| 2010 and Earlier                  | 2  | 701 Immersion        | 0.48 (0.21 – 1.11) | 0 (.91)     |
|                                   |    | 771 Standard Care    | Fixed Effects      | 0%          |



|                              |    |                      |                     |             |
|------------------------------|----|----------------------|---------------------|-------------|
| 2011 and Later               | 3  | 538 Immersion        | 1.48 (0.50 – 4.38)  | 4 (.16)     |
|                              |    | 883 Standard Care    | Fixed Effects       | 45%         |
| <b>Maternal Satisfaction</b> |    |                      |                     |             |
| Obstetric Units              | 5  | 1,802 Immersion      | 2.02 (1.28 – 3.19)  | 24 (<.01)   |
|                              |    | 1,568 Standard care  | Random Effects      | 83%         |
| 2010 and Earlier             | 4  | 1,815 Immersion      | 1.64 (0.83 – 3.24)  | 22 (<.01)   |
|                              |    | 1,519 Standard Care  | Random Effects      | 86%         |
| 2011 and Later               | 2  | 372 Immersion        | 2.55 (1.54 – 4.23)  | 2 (.16)     |
|                              |    | 438 Standard Care    | Random Effects      | 50%         |
| <b>APGAR</b>                 |    |                      |                     |             |
| Obstetric Units              | 18 | 10,286 Immersion     | 0.85 (0.66 – 1.08)  | 29 (.047)   |
|                              |    | 54,361 Standard care | Random Effects      | 38%         |
| Midwifery-led Units          | 3  | 17,092 Immersion     | 0.33 (0.07 – 1.54)  | 57 (<.001)  |
|                              |    | 18,31 Standard care  | Random Effects      | 96%         |
| Waterbirth vs No Water       | 6  | 614 Immersion        | 1.07 (0.76 – 1.51)  | 3 (.643)    |
|                              |    | 655 Standard care    | Fixed Effects       | 0%          |
| 2010 and Earlier             | 8  | 4,184 Immersion      | 1.00 (0.77 – 1.29)  | 7 (.120)    |
|                              |    | 6,476 Standard care  | Fixed Effects       | 39%         |
| 2011 and Later               | 12 | 21,931 Immersion     | 0.52 (0.25 – 1.05)  | 101 (<.001) |
|                              |    | 65,781 Standard care | Random Effects      | 89%         |
| <b>Neonatal Death</b>        |    |                      |                     |             |
| Midwifery-led units          | 2  | 16,786 Immersion     | 0.91 (0.61 – 1.34)  | 1 (.297)    |
|                              |    | 26,722 Standard care | Fixed Effects       | 8%          |
| <b>Cord Avulsion</b>         |    |                      |                     |             |
| Obstetric Units              | 3  | 1,874 Immersion      | 2.18 (0.34 – 11.97) | 1 (.757)    |
|                              |    | 21,621 Standard care | Fixed Effects       | 0%          |
| Midwifery-led Units          | 2  | 10,649 Immersion     | 1.92 (1.28 – 2.89)  | 1 (.386)    |
|                              |    | 16,829 Standard care | Fixed Effects       | 0%          |

a. Random Effects models were used for intervention (labor induction, amniotomy, augmentation, epidural, and episiotomy) models because variation in use of these procedures is dependent on practice habits of the provider which are not otherwise controlled.

[Insert Figure 3]

**Amniotomy.** Five studies provided data on amniotomy (n=1,627). Overall, this analysis found no difference (OR 0.71 ; 95% CI 0.37 – 1.39; random effects; Q=23.9 p<.001; I<sup>2</sup>=83%). Cumulative meta-analysis indicated the available evidence has consistently indicated no difference in the rate of amniotomy. Subgroup analysis of studies reporting in an obstetric setting and the most recent studies remained no difference.

[Insert Figure 4]

**Augmentation.** Three studies provided data to compare augmentation of labour (n=1,420). This analysis favoured water immersion (OR 0.30; 95% CI 0.10 – 0.92; random effects; Q=19.2 p<.001; I<sup>2</sup>=90%). Subgroup analysis of studies reporting in an obstetric setting and the most recent studies remained no difference. Fail-safe analysis estimated 34 additional studies finding no difference would be needed to change the estimate to no difference. Three studies were too few for cumulative meta-analysis.

[Insert Figure 5]

**Fetal Monitoring.** No studies provided data to compare the use of intermittent or continuous fetal monitoring during immersion to standard care.

**Opioid Use.** Eight studies provided data on opioid use (n=27,391), all were conducted in an obstetric setting. Overall, this analysis found reduced use of opioids with water immersion (OR 0.22 95% CI 0.13 – 0.38; random effects; Q=96.1 p<.001; I<sup>2</sup>=93%). Subgroup analysis of the most recent studies remained no difference. Cumulative meta-analysis indicated the available evidence consistently favoured water immersion. Fail-safe analysis estimated 972 additional studies would be needed to change the estimate to no difference.

[Insert Figure 6]

**Epidural use.** Seven studies provided data on epidural use (n=10,993). Overall, this analysis favoured water immersion (OR 0.26 95% CI 0.08 – 0.83; random effects; Q=89.5 p<.001; I<sup>2</sup>=94%). Cumulative meta-analysis revealed the estimate moved from no difference to favour water immersion in

1  
2  
3 2007. Fail-safe analysis indicated 100 additional studies would be needed to change the estimate to no  
4 difference. Subgroup analysis revealed the use of epidural was reduced with water immersion in an  
5 obstetric setting.  
6  
7

8  
9 [Insert Figure 7]  
10

11 **Pain.** Eight studies provided data for analysis of pain (n=1,200), all were conducted in an  
12 obstetric setting. Because these studies varied in their measurement timing and scale, they were combined  
13 with a random effects model for an overall score and the results were stratified by timing of measurement  
14 in the forest plot. Overall, the results indicated reduced pain with water immersion (OR 0.24 95% CI 0.12  
15 – 0.51; random effects; Q=76.7 p<.001; I<sup>2</sup>=91%). One additional study reported in favour of water  
16 immersion but did not provide the data in a way that allowed synthesis.<sup>31</sup> Subgroup analysis of the most  
17 recent studies indicated reduced reports of pain with water immersion. Cumulative meta-analysis  
18 indicated the available evidence moved from no difference to favour water immersion in 2009 and has  
19 been stable since. Fail-safe analysis estimated 279 studies finding no difference would be necessary to  
20 change the estimate from favouring water to no difference.  
21  
22

23  
24 [Insert Figure 8]  
25

26 **Caesarean Birth.** Eight studies provided data on mode of birth comparing water immersion  
27 (n=1190) vs standard care (n=1575), all were conducted in an obstetric setting. All but one study reported  
28 on the difference in caesarean with water immersion during labour; the final study was a randomised  
29 controlled trial that analysed using intention to treat. The meta-analysis indicated no difference between  
30 water immersion and standard care for caesarean birth (OR 0.92 95% CI 0.58 – 1.48; fixed effects; Q=9.0  
31 p=.249; I<sup>2</sup>=23%). Subgroup analysis of studies reporting by year of publication remained no difference.  
32  
33 Cumulative meta-analysis indicated this result has been stable at no difference since the first time the  
34 outcome was reported in 2001.  
35  
36

37  
38 [Insert Figure 9]  
39

40 **Shoulder Dystocia.** Seven studies provided data that could be synthesised for shoulder dystocia  
41 (n=53,367). One additional study reported zero events in the sample and could not be included in the  
42  
43  
44  
45  
46  
47  
48  
49  
50

1  
2  
3 synthesis.<sup>16</sup> There was no difference between water immersion and standard care (OR 0.88 95% CI 0.46 –  
4 1.69; random effects; Q=16 p=.012; I<sup>2</sup>=63%). The subgroup analysis of studies in an obstetric setting and  
5 the most recent studies remained no difference. Cumulative meta-analysis indicated there has consistently  
6 been no difference.  
7  
8  
9

10  
11 [Insert Figure 10]

12  
13 **Intact Perineum.** Seventeen studies provided data on intact perineum (n=59,070). This analysis  
14 favoured water immersion (OR 1.47; 95% CI 1.21 – 1.78; random effects; Q=219.1 p<.001; I<sup>2</sup>=93%).  
15 Note the direction of effect for Figure 11 reflects that intact perineum is a positive outcome. Subgroup  
16 analysis revealed no difference in odds of intact perineum in midwifery-led settings, in studies that  
17 compare waterbirth to no immersion. Subgroup analysis revealed higher odds of intact perineum with  
18 water immersion in an obstetric setting and in the most recent studies. Cumulative meta-analysis indicated  
19 the available evidence has consistently indicated no difference or favoured water immersion, with  
20 evidence stable at favouring water immersion since 2016. Fail-safe analysis estimated 358 additional  
21 studies finding no difference would be necessary to change the estimate from favouring water to no  
22 difference. Subgroup analysis revealed no difference in odds of intact perineum in midwifery-led settings  
23 and in favour of water immersion in an obstetric setting.  
24  
25  
26  
27  
28  
29  
30  
31  
32  
33  
34  
35  
36

37 Meta-regression identified the episiotomy rate (p<.001) and the proportion of nulliparas in the  
38 sample (p=.001) accounted for the variation in odds of an intact perineum (R<sup>2</sup>=1.00). Though only six  
39 studies provided the necessary data to test this association, the statistically significant result indicated the  
40 analysis was adequately powered to find this association. After accounting for these variables, the result  
41 was in favour of water immersion (OR 3.03 95% CI 1.52 – 6.04; random effects; Q=2 p=.504 I<sup>2</sup>=0%).  
42  
43  
44  
45  
46  
47

48 [Insert Figure 11]

49 **OASI.** Fifteen studies provided data on obstetric anal sphincter injuries (n=93,690). This analysis  
50 found no difference (OR 0.84 95% CI 0.59 – 1.18; random effects; Q=52.6 p<.001; I<sub>2</sub>=73%). Cumulative  
51 meta-analysis indicated the estimate has moved between no difference and favouring water, with the most  
52 recent change to no difference occurring in 2019. Analysis of subgroups by setting found consistent  
53  
54  
55  
56  
57

1  
2  
3 results of no difference in both settings. Meta-regression of the studies with the a priori selected control  
4 variables was not able to reduce the heterogeneity.  
5  
6

7 [Insert Figure 12]  
8

9 **Episiotomy.** Fifteen studies provided data on use of episiotomy (n=36,558). This analysis found  
10 reduced use of episiotomy with water immersion (OR 0.16; 95% CI 0.10 – 0.26; random effects; Q=114.3  
11 p<.001; I<sup>2</sup>=88%). Subgroup analysis revealed a reduction with water immersion in an obstetric setting, for  
12 nulliparas, and in the most recent studies. Cumulative meta-analysis indicated the available evidence has  
13 consistently favoured water immersion. Fail-safe analysis estimated 1525 additional studies finding no  
14 difference would be necessary to change the estimate from favouring water to no difference.  
15  
16

17  
18  
19  
20  
21  
22  
23  
24  
25  
26  
27  
28  
29  
30  
31  
32  
33  
34  
35  
36  
37  
38  
39  
40  
41  
42  
43  
44  
45  
46  
47  
48  
49  
50  
51  
52  
53  
54  
55  
56  
57  
58  
59  
60  
Meta-regression of the studies in an obstetric setting indicated the proportion of nulliparas in the  
sample accounted for some of the variance (R<sup>2</sup>=.76; p=.001; 7 studies). Though this analysis was limited  
to seven studies, the finding of an association indicates the analysis had adequate power to identify the  
association. After accounting for the variation in proportion of nulliparas, the result remained in favour of  
water immersion (OR 0.04 95% CI 0.01 – 0.13; random effects; Q=12 p=.038; I<sup>2</sup>=57%).

[Insert Figure 13]

**Third Stage Management.** No studies provided comparison data for third stage management.

**Postpartum Hemorrhage.** Fifteen studies provided data about postpartum hemorrhage  
(n=63,891) using three different measures: count of postpartum hemorrhage defined as >500 ml blood  
loss, mean estimated blood loss, and change in hemoglobin. Overall, this analysis favoured water  
immersion (OR 0.69 95% CI 0.51 – 0.95; random effects; Q=116.5 p<.001; I<sup>2</sup>=88%). Subgroup analysis  
revealed no difference in odds of postpartum hemorrhage in midwife-led settings, in studies comparing  
waterbirth to no water use, and the most recent studies. Subgroup analysis revealed a reduction with water  
immersion in an obstetric setting. Cumulative meta-analysis of the random effects model found the  
available evidence has consistently indicated no difference. Fail-safe analysis estimated 198 additional  
studies finding no difference would be necessary to change the estimate from favouring water to no  
difference.

1  
2  
3 Meta-regression of the studies in an obstetric setting identified no association with induction rate  
4 (R<sup>2</sup>=0; p=0.777; 9 studies). Too few studies provided the data necessary to determine the effect of active  
5 management of third stage or the birth of the placenta and membranes into the water.  
6  
7

8  
9 [Insert Figure 14]  
10

11 **Manual removal of the placenta.** Five studies provided data to assess risk for manual removal  
12 of the placenta (n=2,893). This analysis indicated no difference (OR 0.73 95% CI 0.38-1.42; fixed  
13 effects; Q=6.2 p=.181; I<sup>2</sup>=36%). Cumulative meta-analysis indicated there has consistently been no  
14 difference in manual removal of the placenta. Subgroup analysis revealed no difference in an obstetric  
15 setting and in the most recent studies.  
16  
17

18  
19 [Insert Figure 15]  
20

21 **Maternal Infection.** Three studies provided data about maternal infection (n=32,653), all were  
22 conducted in an obstetric setting. This analysis favoured water immersion (OR 0.64 95% CI 0.52 – 0.80;  
23 fixed effects; Q=0.5 p=.792; I<sup>2</sup>=0%), however one study carried 97% of the weight for this synthesis.  
24 Fail-safe analysis estimated 2 additional studies finding no difference would be necessary to change the  
25 estimate from favouring water to no difference. Three studies were too few for cumulative meta-analysis.  
26  
27

28  
29 [Insert Figure 16]  
30

31 **Maternal Satisfaction.** Six studies provided data on a measure of maternal satisfaction  
32 (n=4,144). Due to heterogeneity in measurement tool, this analysis used random effects modeling and  
33 results were stratified by measurement tool in the forest plot. This analysis indicated increased  
34 satisfaction with water immersion (OR 1.95 95% CI 1.28 – 2.96; random effects; Q=24.3 p<.001;  
35 I<sup>2</sup>=33%). Note the direction of effect for Figure 17 reflects that maternal satisfaction is a positive  
36 outcome. Subgroup analysis revealed increased satisfaction with water immersion in an obstetric setting  
37 and in the most recent studies. Cumulative meta-analysis indicated the available evidence moved from no  
38 difference to favoured water immersion in 2018. Fail-safe analysis estimated 133 additional studies  
39 finding no difference would be necessary to change the estimate from favouring water to no difference.  
40  
41

42  
43 [Insert Figure 17]  
44

1  
2  
3 **5-Minute APGAR.** Twenty-one studies provided data for 5-minute APGAR (n=98,372). This  
4 analysis found no difference (OR 0.63 95% CI 0.38 – 1.05; random effects; Q=146.5 p<.001; I<sup>2</sup>=87%).  
5  
6 Three additional studies reported on 5-minute APGAR but did not provide data in a usable format; two  
7  
8 found no difference<sup>47,52</sup> and one reported in favor of water immersion.<sup>61</sup> Analysis of subgroups found  
9  
10 consistent results of no difference. Cumulative meta-analysis indicated the available evidence has  
11  
12 consistently demonstrated no difference.  
13  
14

15  
16 Meta-regression indicated that study setting accounted for some between-study variance (R<sup>2</sup>=.85;  
17  
18 p=.001; 9 studies). After accounting for setting the analysis favoured water immersion (OR 0.14 95% CI  
19  
20 0.06 – 0.36; random effects; Q=20 p=.034; I<sup>2</sup>=50%).  
21

22 [Insert Figure 18]  
23

24 **Newborn Resuscitation.** Five studies provided data on newborn resuscitation (n=51,028), all  
25  
26 were conducted in an obstetric setting. This analysis found no difference (OR 0.91; 95% CI 0.49 – 1.69;  
27  
28 random effects; Q=9.6 p=.048; I<sup>2</sup>=58%. Cumulative meta-analysis indicated this outcome has been stable  
29  
30 at no difference since first reported.  
31

32 [Insert Figure 19]  
33

34 **Transient tachypnea of the newborn.** Two studies provided data on transient tachypnea of the  
35  
36 newborn (n=1,473), both were conducted in an obstetric setting. This analysis found no difference (OR  
37  
38 0.74; 95% CI 0.33-1.65; fixed effects; Q=0.8 p=.364; I<sup>2</sup>=0%). Too few studies were available to conduct  
39  
40 cumulative meta-analysis and subgroup analysis.  
41

42 [Insert Figure 20]  
43

44 **Respiratory distress of the newborn.** Three studies provided data on respiratory distress of the  
45  
46 newborn (n=32,707), all were conducted in an obstetric setting. This analysis indicated no difference (OR  
47  
48 0.34; 95% CI 0.05 – 2.43; random effects; Q=18.1 p<.001; I<sup>2</sup>=89%). Three studies were too few for  
49  
50 cumulative meta-analysis.  
51

52 [Insert Figure 21]  
53

54 **Neonatal intensive care unit admission.** No studies met the definition for NICU admission.  
55  
56  
57  
58

1  
2  
3 **Neonatal death.** Three studies provided data on neonatal death (n=66,544), all were published  
4 after 2010. This analysis indicated no difference (OR 0.94; 95% CI 0.63 – 1.40; fixed effects; Q=1.9  
5 p=.381; I<sup>2</sup>=0%). Subgroup analysis by setting revealed no difference in midwifery-led settings. Three  
6 studies were too few for cumulative meta-analysis.  
7  
8  
9

10  
11 [Insert Figure 22]  
12

13 **Infection in newborn period.** Only one study met the definition for reporting newborn infection;  
14 it reported no difference.  
15

16 **Cord Avulsion.** Five studies provided data on cord avulsion (n=50,791), all were published after  
17 2010. This analysis favoured standard care (OR 1.94 95% CI 1.30 – 2.88; fixed effects; Q=1.3 p=.856;  
18 I<sup>2</sup>=0%). One study was responsible for 92.7% of the weight of this analysis, when that study was removed  
19 the result became no difference (OR 2.92 95% CI 0.67 – 12.77). Subgroup analysis by setting found no  
20 difference in an obstetric setting, but increased odds of cord avulsion in midwifery-led settings.  
21  
22 Cumulative meta-analysis indicated the estimate moved from no difference to favour standard care in  
23 2019. Fail-safe analysis estimated 5 additional studies would be needed to change the estimate to no  
24 difference.  
25  
26  
27  
28  
29  
30  
31  
32  
33

34 [Insert Figure 23]  
35

36 **Breastfeeding Initiation.** Two studies provided data on breastfeeding initiation (n=692). This  
37 analysis found no difference (OR 1.00 95% CI 0.73 – 1.37; fixed effects; Q=1.0 p=.325; I<sup>2</sup>=0%). Note the  
38 direction of effect for Figure 24 reflects that breastfeeding initiation is a positive outcome. Two studies  
39 were too few for cumulative meta-analysis and subgroup analysis.  
40  
41  
42  
43  
44

45 [Insert Figure 24]  
46

#### 47 *Risk of bias across studies*

48  
49 Risk of bias analysis results are available in Table 5. Begg's Test has moderate power with 25  
50 studies, so is underpowered to find publication bias for this review. Egger's Regression identified risk for  
51 publication bias in three outcomes: epidural, intact perineum, and shoulder dystocia. In each case, trim &  
52 fill estimates of the magnitude of bias indicate the magnitude was too small to affect the results.  
53  
54  
55  
56  
57



Table 5: Analysis of risk of bias across studies comparing water immersion for labour and waterbirth to standard care.

| Outcome                  | k  | Begg's Test Rank Correlation S-statistic ( <i>p</i> ) | Egger's Regression Intercept ( <i>p</i> ) | Trim & Fill Direction of Bias <sup>a</sup> OR (95% CI) |
|--------------------------|----|-------------------------------------------------------|-------------------------------------------|--------------------------------------------------------|
| Amniotomy                | 5  | 4 (.164)                                              | 5.04 (.129)                               | Standard Care<br>0.43 (0.34 – 0.53)                    |
| Induction                | 3  | -3 (0.059)                                            | -10 (.238)                                | --                                                     |
| Augmentation             | 3  | 3 (0.59)                                              | 28.96 (.057)                              | Standard Care<br>0.12 (0.09 – 0.16)                    |
| Opioid                   | 8  | -2 (.402)                                             | 2.13 (.197)                               | Standard Care<br>0.17 (0.15 – 0.19)                    |
| Epidural                 | 7  | -9 (.088)                                             | -4.51 (.039)                              | Immersion<br>0.67 (0.54 – 0.83)                        |
| Cesarean                 | 8  | -2 (.402)                                             | -0.74 (.327)                              | --                                                     |
| Pain                     | 8  | 0 (.500)                                              | -1.67 (.339)                              | Standard Care<br>0.16 (0.07 – 0.37)                    |
| Satisfaction             | 6  | -5 (.174)                                             | -1.26 (.216)                              | Immersion<br>1.73 (1.13 – 2.64)                        |
| Intact Perineum          | 14 | -10 (.340)                                            | 2.13 (.045)                               | Standard Care<br>1.71 (1.40 – 2.10)                    |
| Episiotomy               | 13 | -11 (.274)                                            | -1.27 (.121)                              | Immersion<br>0.20 (0.13 – 0.32)                        |
| OASI                     | 14 | 3 (.435)                                              | 0.40 (.234)                               | Standard Care<br>0.64 (0.50 – 0.82)                    |
| Shoulder Dystocia        | 7  | 5 (.226)                                              | 1.85 (.001)                               | Standard Care<br>0.68 (0.38 – 1.21)                    |
| Maternal Infection       | 3  | --                                                    | 0.34 (.290)                               | --                                                     |
| Postpartum Hemorrhage    | 13 | 9 (.328)                                              | -0.23 (.412)                              | Standard Care<br>0.52 (0.39 – 0.71)                    |
| Retained Placenta        | 5  | 6 (.071)                                              | 2.11 (.068)                               | Standard Care<br>0.76 (0.29 – 2.03)                    |
| APGAR                    | 16 | -34 (.179)                                            | 0.86 (.209)                               | Standard Care<br>0.59 (0.36 – 0.96)                    |
| Neonatal Resuscitation   | 5  | 2 (.312)                                              | 0.69 (.282)                               | --                                                     |
| Transient Tachypnea      | 2  | --                                                    | --                                        | --                                                     |
| Respiratory Distress     | 3  | 1 (.301)                                              | -1.77 (.426)                              | --                                                     |
| Neonatal Death           | 3  | 1 (.301)                                              | 1.34 (.078)                               | Standard Care<br>0.84 (0.53 – 1.33)                    |
| Cord Avulsion            | 5  | 6 (.071)                                              | 0.36 (.182)                               | Standard Care<br>1.86 (1.26 – 2.75)                    |
| Breastfeeding Initiation | 2  | --                                                    | --                                        | --                                                     |

a. Trim & Fill analysis conducted with random effects model and indicates OR and 95% Confidence Interval estimate if bias were corrected.

## Discussion

The main findings of this systematic review and meta-analysis are that labouring and/or giving birth in water has clear benefits to women in the obstetric setting. These findings are interesting because, in general, healthy women are more likely to experience interventions and adverse outcomes in this setting compared to midwifery-led settings and this has been reported for women who labour and/or give birth in water.<sup>3,67-69</sup> Given that globally, most births take place in the obstetric setting, this review shows that water immersion can significantly increase the likelihood of an intact perineum and reduce episiotomy; an intervention which offers no perineal or fetal benefit, can increase postnatal pain, anxiety and impact negatively on a woman's birth experience.<sup>70,71</sup> Furthermore, labouring and/or giving birth in water does not increase the likelihood of obstetric anal sphincter injury (OASI), which corroborates previous waterbirth research.<sup>7,72,73</sup> A significant postpartum haemorrhage (PPH) reduction was another important finding, which is also supported in the literature.<sup>74</sup>

In this study, there was no difference in caesarean birth rate between those who used water and those who did not. Interestingly, the caesarean rate in these studies was 3.6%, with all but two studies reporting a caesarean birth rate of less than 10% for the study participants. Given the low caesarean rates reported by most studies, these results should not be generalised to settings with a caesarean rate higher than 10% for women considered low risk. The study with a caesarean rate of 19% is not generalisable to settings with a low risk caesarean birth rate higher than 10% because it compared the use of water immersion to medical augmentation for women with a stalled labour.<sup>34</sup> One study with a caesarean rate of 26% is generalisable to settings with a higher low risk caesarean birth rate.<sup>46</sup>

Our results for newborns mirror those reported in three substantial newborn specific systematic reviews.<sup>10-12</sup> Additionally, this study improved on prior research, which was limited by variations in definition for reporting newborn infection and NICU admission. The more rigorous definitions used for this study reveals limited reporting of serious complications. Given the lack of association with poor newborn outcomes between this study and prior analyses, it is unlikely that differences in prevalence of serious complications between water immersion and standard care exist.

1  
2  
3 More cord avulsions were reported for waterbirths and may relate to possible undue traction on  
4 the umbilical cord as the newborn is brought up out of the water.<sup>3,75</sup> The incidence of cord avulsion was  
5 4.3 per 1,000 births in water compared to 1.3 per 1,000 births with standard care. Interestingly, the  
6 incidence of cord avulsion varied from 0.2 per 1,000 to 11.8 per 1,000 in the five studies that reported this  
7 outcome, suggesting individual practice characteristics are more relevant to the incidence of cord avulsion  
8 than whether the birth occurs in water. A review of case reports of poor newborn outcomes found that  
9 when reported, cord avulsion was easily managed by the midwife with no consequences for the  
10 newborn.<sup>76</sup>

11  
12 Our results show that water immersion has the potential to make a meaningful contribution to the  
13 global agenda toward promoting physiologic birth.<sup>77,78,79,80,81</sup> Labouring and/or giving birth in water can  
14 reduce maternal pain with no increased risk of an adverse event, and without the risk introduced by  
15 epidural and opioids.<sup>82,83,84,85</sup> Differences between birth settings in intact perineum and postpartum  
16 haemorrhage suggest water immersion in an obstetric setting may result in outcomes similar to those  
17 achieved in midwifery-led settings. This interpretation is supported by the results of subgroup analysis of  
18 studies in an obstetric setting that labour induction and episiotomy are reduced with water immersion,  
19 while maternal satisfaction is increased. Given these results, water immersion for labour and waterbirth is  
20 an intervention that can be used to achieve physiologic birth and improve the quality of care in the  
21 obstetric setting.

22  
23 One major issue that hindered the potential of this review was that only four studies were  
24 conducted in midwifery-led settings. None of the included studies described the care model in operation  
25 where the study participants laboured. Healthy women who give birth in a midwifery-led setting are more  
26 likely to experience fewer interventions and adverse outcomes compared with those who give birth in an  
27 obstetric setting, particularly nullipara.<sup>2,3</sup> There is strong evidence showing that the relational element of  
28 care matters to service users, and continuity of carer/care is linked to fewer interventions and adverse  
29 outcomes when compared to fragmented care models.<sup>85</sup> This is important because birth pool use is most

1  
2  
3 prevalent in midwifery-led settings.<sup>3</sup> Evidence-based practice of water immersion requires research that  
4 reflects the context of care provision.  
5  
6

7 Few studies provided information generally considered to be relevant to the outcomes reported or  
8 controlled for potential confounders. Just over half the studies (k=20, 55%) included some description of  
9 the birth pool(s), resulting in uncertainty about whether all participants could move around and adopt  
10 different positions with ease. Furthermore, studies did not specify the type of fetal monitoring. Since  
11 intermittent auscultation does not inhibit mobility, and continuous electronic fetal monitoring (EFM)  
12 typically does, this could present a confounder. Few studies stratified for parity, even when the outcomes  
13 reported occur at higher rates among nullipara. Only six studies (17%) mentioned inclusion of induction of  
14 labour while five studies included women with a prior caesarean. Only eight studies (22%) provided birth  
15 pool eligibility criteria regarding raised BMI. These studies did not include BMI as a characteristic in their  
16 analysis for interventions or outcomes. However, their inclusion in the study populations suggest that water  
17 immersion is not considered to be harmful for women who have raised BMI but are otherwise healthy. No  
18 studies provided data for the management of the third stage of labour in the studies, to enable examination  
19 for any associations between active or physiological management and postpartum haemorrhage.  
20 Improvements in reporting standards would enable expansion of populations considered appropriate for  
21 water immersion and identify best practice for birth pool use.  
22  
23  
24  
25  
26  
27  
28  
29  
30  
31  
32  
33  
34  
35  
36  
37  
38

### 39 **Strengths and Limitations of this work**

40  
41 This was the first substantial systematic review to attempt to include birth setting as an analytic  
42 variable. A broad search strategy was developed and all review processes were conducted by at least two  
43 reviewers. This study incorporated meta-regression, using covariates identified a priori, to reduce the  
44 effect of sources of heterogeneity. The inclusion of analyses of the stability of the results, cumulative  
45 meta-analysis and fail-safe, add value to the synthesis by identifying which outcomes may be considered  
46 sufficiently researched. The results are further strengthened by use of a trim & fill analysis to identify the  
47 direction of any potential publication bias.  
48  
49  
50  
51  
52  
53  
54  
55  
56  
57  
58  
59  
60

1  
2  
3 This review was limited to studies published during or after 2000 or later because earlier studies  
4 may not be generalisable to current water immersion practices. This review did not include grey literature,  
5 and was limited by language; the search was conducted in English using English-language indices. This  
6 analysis was limited to a priori variables for meta-regression. Additional variables, not tested in this  
7 study, may contribute to heterogeneity. Inconsistency of reporting on birth setting, care practices,  
8 interventions and outcomes prevented us from achieving our secondary objective to account for  
9 intrapartum care variation. Meta-regression was only possible for three outcomes: intact perineum,  
10 episiotomy and postpartum haemorrhage.  
11  
12  
13  
14  
15  
16  
17  
18  
19  
20  
21

## 22 **Clinical Implications**

23  
24 Water immersion provides benefits for the mother and newborn when used in the obstetric  
25 setting, making water immersion a low-tech intervention for improving quality and satisfaction with care.  
26 In addition, water immersion during labour and waterbirth alter clinical practice resulting in less  
27 augmentation, episiotomy, and requirements for pharmacologic analgesia. Water immersion is an  
28 effective method to reduce pain in labour, without increasing risk. Clinicians should be mindful to avoid  
29 putting undue traction on the umbilical cord when bringing the newborn to the surface of the water.  
30  
31  
32  
33  
34  
35  
36

## 37 **Research implications**

38  
39 Water immersion during labour and birth is a low-tech yet complex, nuanced intervention. We  
40 suggest that studies incorporate the following fundamentals to advance the evidence: birth pool  
41 description, clearly described maternal and obstetric characteristics, the birth setting, the care model, and  
42 use of standardised definitions. Studies should report potential confounders such as hands-on or -off the  
43 perineum and third stage management. When appropriate for the outcome, results should be stratified by  
44 maternal parity. The study population should reflect all those now using a birth pool, not just the healthy  
45 women who experience an uncomplicated pregnancy. There is a need for additional research conducted in  
46 midwifery-led settings to establish best practice.  
47  
48  
49  
50  
51  
52  
53  
54  
55  
56  
57  
58  
59  
60

## Conclusion

Water immersion during labour and birth, while low-tech, is a complex, nuanced intervention. Importantly it has clear benefits for healthy women and their newborns when in the obstetric unit setting where the majority of women give birth, and may have benefits for populations previously excluded from water immersion. To enable the identification of best practice regarding water immersion, future birthing pool research should integrate factors that are known to influence intrapartum interventions and outcomes. These include maternal parity, the care model, care practices, birth setting and a clear description of the water immersion receptacle.

## References

1. Cluett ER, Burns E, Cuthbert A. Immersion in water during labour and birth. *Cochrane Database Syst Rev.* 2018;5(5):CD000111. Published 2018 May 16. doi:10.1002/14651858.CD000111.pub4
2. Brocklehurst P, Hardy P, Hollowell J, et al. Perinatal and maternal outcomes by planned place of birth for healthy women with low risk pregnancies: The Birthplace in England national prospective cohort study. *BMJ* 2011; 343:d7400 <https://doi.org/10.1136/bmj.d7400> (Published 25 November 2011)
3. Burns EE, Boulton MG, Cluett E, Cornelius VR, Smith LA. Characteristics, interventions, and outcomes of women who used a birthing pool: a prospective observational study. *Birth.* 2012; 39(3):192-202.
4. Prins M, Boxem J, Lucas C, Hutton E. Effect of spontaneous pushing versus Valsalva pushing in the second stage of labour on mother and fetus: a systematic review of randomised trials. *BJOG.* 2011;118(6):662-670. doi:10.1111/j.1471-0528.2011.02910.x
5. Edqvist, M., Blix, E., Hegaard, H.K. *et al.* Perineal injuries and birth positions among 2992 women with a low risk pregnancy who opted for a homebirth. *BMC Pregnancy Childbirth* **16**, 196 (2016). <https://doi.org/10.1186/s12884-016-0990-0>
6. Gupta JK, Sood A, Hofmeyr GJ, Vogel JP. Position in the second stage of labour for women without epidural anaesthesia. *Cochrane Database Syst Rev.* 2017;5(5):CD002006. Published 2017 May 25. doi:10.1002/14651858.CD002006.pub4
7. Aasheim V, Nilssen AB, Lukasse M, Reinart LM. Perineal techniques during the second stage of labour for reducing perineal trauma. *Cochrane Database Syst Rev.* 2011;(12):CD006672. Published 2011 Dec 7. doi:10.1002/14651858.CD006672.pub2
8. Bulchandani S, Watts E, Sucharitha A, Yates D, Ismail KM. Manual perineal support at the time of childbirth: a systematic review and meta-analysis. *BJOG: An International Journal of Obstetrics and Gynaecology.* 2015;122(9):1157-1165.
9. Begley CM, Gyte GM, Devane D, McGuire W, Weeks A, Biesty LM. Active versus expectant management for women in the third stage of labour. *Cochrane Database Syst Rev.* 2019; 2(2):CD007412. Published 2019 Feb 13. doi:10.1002/14651858.CD007412.pub5
10. Davies R, Davis D, Pearce M, Wong N. The effect of waterbirth on neonatal mortality and morbidity: a systematic review and meta-analysis. *JBI Database System Rev Implement Rep.* 2015;13(10):180-231. doi:10.11124/jbisrir-2015-2105
11. Taylor H, Kleine I, Bewley S, Loucaides E, Sutcliffe A. Neonatal outcomes of waterbirth: a systematic review and meta-analysis. *Arch Dis Child Fetal Neonatal Ed.* 2016;101(4):F357-F365. doi:10.1136/archdischild-2015-309600

12. Vanderlaan J, Hall PJ, Lewitt M. Neonatal outcomes with water birth: A systematic review and meta-analysis. *Midwifery*. 2018;59:27-38. doi:10.1016/j.midw.2017.12.023
13. Pagano E, De Rota B, Ferrando A, Petrinco M, Merletti F, Gregori D. An economic evaluation of water birth: the cost-effectiveness of mother well-being. *Journal of Evaluation in Clinical Practice*. 2010; 16(5):916-919.
14. Davies MW. Water births and the research required to assess the benefits versus the harms. *Journal of Paediatrics and Child Health*. 2012; 48(9):726-729.
15. Bovbjerg ML. Opposition to Waterbirth Is Not Evidence Based. May 2021; 30(5):625-627.  
<https://home.liebertpub.com/jwh>
16. Page MJ, McKenzie JE, Bossuyt PM, et al. The PRISMA 2020 statement: an updated guideline for reporting systematic reviews. *BMJ*. 2021;372:n71. Published 2021 Mar 29. doi:10.1136/bmj.n71
17. Squires JE, Valentine JC, Grimshaw JM. Systematic reviews of complex interventions: framing the review question. *Journal of Clinical Epidemiology*. 2013; 66(11):1215-22.
18. JPT H, Green S. Cochrane Handbook for Systematic Reviews of Interventions Version 5.1.0 [updated March 2011]: The Cochrane Collaboration; 2011 <https://handbook-5-1.cochrane.org/>
19. Ouzzani, M., Hammady, H., Fedorowicz, Z. *et al.* Rayyan—a web and mobile app for systematic reviews. *Syst Rev* 5, 210 (2016). <https://doi.org/10.1186/s13643-016-0384-4>
20. Sterne JA, Hernán MA, Reeves BC, et al. ROBINS-I: a tool for assessing risk of bias in non-randomised studies of interventions. *BMJ*. 2016;355:i4919. Published 2016 Oct 12.  
doi:10.1136/bmj.i4919
21. Biostat Inc. Comprehensive Meta-Analysis V.3. 2017.
22. Leimu R, Koricheva J. Cumulative meta-analysis: A new tool for detection of temporal trends and publication bias in ecology. *Proceedings of the Royal Society B: Biological Sciences*. September 2004;271(1551):1961-1966.
23. Carson KP, Schriesheim CA, Kinicki AJ. The Usefulness of the "Fail-Safe" Statistic in Meta-Analysis. *Educational and Psychological Measurement*. June 1990;50(2):233-243.
24. The Nordic Cochrane Center TCC. Review Manger (RevMan) 5.4.1  
<https://training.cochrane.org/online-learning/core-software-cochrane-reviews/revman>
25. Murad MH, Chu H, Lin L, Wang Z. The effect of publication bias magnitude and direction on the certainty in evidence. *BMJ Evid Based Med*. 2018;23(3):84-86. doi:10.1136/bmjebm-2018-110891
26. Duval S, Tweedie R. Trim and fill: A simple funnel-plot-based method of testing and adjusting for publication bias in meta-analysis. *Biometrics*. 2000;56(2):455-463. doi:10.1111/j.0006-341x.2000.00455.x



- 1
  - 2
  - 3
  - 4
  - 5
  - 6
  - 7
  - 8
  - 9
  - 10
  - 11
  - 12
  - 13
  - 14
  - 15
  - 16
  - 17
  - 18
  - 19
  - 20
  - 21
  - 22
  - 23
  - 24
  - 25
  - 26
  - 27
  - 28
  - 29
  - 30
  - 31
  - 32
  - 33
  - 34
  - 35
  - 36
  - 37
  - 38
  - 39
  - 40
  - 41
  - 42
  - 43
  - 44
  - 45
  - 46
  - 47
  - 48
  - 49
  - 50
  - 51
  - 52
  - 53
  - 54
  - 55
  - 56
  - 57
  - 58
  - 59
  - 60
27. Baker WL, White CM, Cappelleri JC, Kluger J, Coleman CI; Health Outcomes, Policy, and Economics (HOPE) Collaborative Group. Understanding heterogeneity in meta-analysis: the role of meta-regression. *Int J Clin Pract*. 2009; 63(10):1426-1434. doi:10.1111/j.1742-1241.2009.02168.x
28. Borenstein M, Hedges LV, Higgins JPT, Rothstein H. Regression in Meta-Analysis 2017.
29. Piccininni, M., Konigorski, S., Rohmann, J.L. *et al*. Directed acyclic graphs and causal thinking in clinical risk prediction modeling. *BMC Med Res Methodol* **20**, 179 (2020).  
<https://doi.org/10.1186/s12874-020-01058-z>
30. Bailey JM, Zielinski RE, Emeis CL, Kane Low L. A retrospective comparison of waterbirth outcomes in two United States hospital settings. *Birth*. March 2020; 47(1):98-104.
31. Barry PL, McMahon LE, Banks RA, Fergus AM, Murphy DJ. Prospective cohort study of water immersion for labour and birth compared with standard care in an Irish maternity setting. *BMJ Open*. 2020;10(12):e038080. Published 2020 Dec 4. doi:10.1136/bmjopen-2020-038080).
32. Benfield RD, Hortobágyi T, Tanner CJ, Swanson M, Heitkemper MM, Newton ER. The Effects of Hydrotherapy on Anxiety, Pain, Neuroendocrine Responses, and Contraction Dynamics During Labor. *Biological Research for Nursing*. 2010;12(1):28-36.
33. Bovbjerg ML, Cheyney M, Everson C. Maternal and Newborn Outcomes Following Waterbirth: The Midwives Alliance of North America Statistics Project, 2004 to 2009 Cohort. *Journal of Midwifery and Women's Health*. January 2016; 61(1):11-20.
34. Cluett ER, Pickering RM, Getliffe K, St George Saunders NJ. Randomised controlled trial of labouring in water compared with standard of augmentation for management of dystocia in first stage of labour. *BMJ*. 2004;328(7435):314. doi:10.1136/bmj.37963.606412.EE.
35. da Silva FMB, de Oliveira SMJV, Nobre MRC. A randomised controlled trial evaluating the effect of immersion bath on labour pain. *Midwifery*. June 2009; 25(3):286-294.
36. Eckert K, Turnbull D, MacLennan A. Immersion in water in the first stage of labor: A randomized controlled trial. *Birth*. 2001; 28(2):84-93.
37. Geissbühler V, Eberhard J. Waterbirths: A comparative study - A prospective study on more than 2,000 waterbirths. *Fetal Diagnosis and Therapy*. 2000; 15(5):291-300.
38. Geissbuehler V, Eberhard J, Lebrecht A. Waterbirth: Water temperature and bathing time - Mother knows best! *Journal of Perinatal Medicine*. 2002; 30(5):371-378.
39. Geissbuehler V, Stein S, Eberhard J. Waterbirths compared with landbirths: An observational study of nine years. *Journal of Perinatal Medicine*. 2004; 32(4):308-314.
40. Haslinger C, Burkhardt T, Stoiber B, Zimmermann R, Schäffer L. Position at birth as an important factor for the occurrence of anal sphincter tears: A retrospective cohort study. *Journal of Perinatal Medicine*. November 2015; 43(6):715-720.

- 1  
2  
3 41. Henderson, J., Burns, E.E., Regalia, A.L. *et al.* Labouring women who used a birthing pool in obstetric  
4 units in Italy: prospective observational study. *BMC Pregnancy Childbirth* **14**, 17 (2014).  
5 <https://doi.org/10.1186/1471-2393-14-17>  
6
- 7  
8 42. Hodgson ZG, Comfort LR, Albert AAY. Water Birth and Perinatal Outcomes in British Columbia: A  
9 Retrospective Cohort Study. *J Obstet Gynaecol Can.* 2020;42(2):150-155.  
10 doi:10.1016/j.jogc.2019.07.007  
11
- 12 43. Jacoby S, Becker G, Crawford S, Wilson RD. Water Birth Maternal and Neonatal Outcomes Among  
13 Midwifery Clients in Alberta, Canada, from 2014 to 2017: A Retrospective Study. *J Obstet Gynaecol*  
14 *Can.* 2019;41(6):805-812. doi:10.1016/j.jogc.2018.12.014  
15
- 16 44. Lathrop A, Bonsack CF, Haas DM. Women's experiences with water birth: A matched groups  
17 prospective study. *Birth.* December 2018;45(4):416-423.  
18
- 19 45. Lim KMX, Tong PSY, Chong YS. A comparative study between the pioneer cohort of waterbirths and  
20 conventional vaginal deliveries in an obstetrician-led unit in Singapore. *Taiwanese Journal of*  
21 *Obstetrics and Gynecology.* June 2016;55(3):363-367.  
22
- 23 46. Liu, Y., Liu, Y., Huang, X. *et al.* A comparison of maternal and neonatal outcomes between water  
24 immersion during labor and conventional labor and delivery. *BMC Pregnancy Childbirth* **14**, 160  
25 (2014). <https://doi.org/10.1186/1471-2393-14-160>  
26
- 27 47. Mallen-Perez L, Roé-Justiniano MT, Colomé Ochoa N, Ferre Colomat A, Palacio M, Terré  
28
- 29 48. Rull C. Use of hydrotherapy during labour: Assessment of pain, use of analgesia and neonatal safety.  
30 *Enfermeria Clinica.* September 2018; 28(5):309-315.  
31
- 32 49. Menakaya U, Albayati S, Vella E, Fenwick J, Angstetra D. A retrospective comparison of water birth  
33 and conventional vaginal birth among women deemed to be low risk in a secondary level hospital in  
34 Australia. *Women and Birth.* June 2013;26(2):114-118.  
35
- 36 50. Mollamahmutoğlu L, Moraloğlu Ö, Özyer Ş, et al. The effects of immersion in water on labor, birth  
37 and newborn and comparison with epidural analgesia and conventional vaginal delivery. *Journal of*  
38 *the Turkish German Gynecology Association.* 2012; 13(1):45-49.  
39
- 40 51. Neiman E, Austin E, Tan A, Anderson CM, Chipps E. Outcomes of Waterbirth in a US Hospital-  
41 Based Midwifery Practice: A Retrospective Cohort Study of Water Immersion During Labor and  
42 Birth. *Journal of Midwifery and Women's Health.* March 2020; 65(2):216-223.  
43
- 44 52. Ohlsson G, Buchhave P, Leandersson U, Nordström L, Rydhström H, Sjölin I. Warm tub bathing  
45 during labor: Maternal and neonatal effects. *Acta Obstetrica et Gynecologica Scandinavica.* January  
46 2001; 80(4):311-314.  
47  
48  
49  
50  
51  
52  
53  
54  
55  
56  
57  
58  
59  
60

- 1  
2  
3 53. Otigbah CM, Dhanjal MK, Harmsworth G, Chard T. A retrospective comparison of water births and  
4 conventional vaginal deliveries. *European Journal of Obstetrics and Gynecology and Reproductive*  
5 *Biology*. 2000; 91(1):15-20.  
6  
7  
8 54. Pagano E, De Rota B, Ferrando A, Petrinco M, Merletti F, Gregori D. An economic evaluation of  
9 water birth: The cost-effectiveness of mother well-being. *Journal of Evaluation in Clinical Practice*.  
10 October 2010; 16(5):916-919.  
11  
12 55. Peacock PJ, Zengeya ST, Cochrane L, Sleath M. Neonatal Outcomes Following Delivery in Water:  
13 Evaluation of Safety in a District General Hospital. *Cureus*. February 2018; 10(2).  
14  
15 56. Preston HL, Alfirevic Z, Fowler GE, Lane S. Does water birth affect the risk of obstetric anal  
16 sphincter injury? Development of a prognostic model. *International Urogynecology Journal*. June  
17 2019; 30(6):909-915.  
18  
19 57. Ros H. Effect, of waterbirths and traditional bedbirths on outcomes for neonates. *Curationis*. 2009;  
20 32(2).  
21  
22 58. Sert UY, Ozel S, Neselioglu S, Erel O, Engin Ustun Y. Water Immersion During the Labour and  
23 Effects on Oxidative Stress. *Fetal and Pediatric Pathology*. May 2020; 39(3):185-193.  
24  
25 59. Snapp C, Stapleton SR, Wright J, Niemczyk NA, Jolles D. The experience of land and water birth  
26 within the american association of birth centers perinatal data registry, 2012-2017. *Journal of*  
27 *Perinatal and Neonatal Nursing*. January 2020; 34(1):16-25.  
28  
29 60. Thoeni A, Zech N, Moroder L, Ploner F. Review of 1600 water births. Does water birth increase the  
30 risk of neonatal infection? *Journal of Maternal-Fetal and Neonatal Medicine*. May 2005; 17(5):357-  
31 361.  
32  
33 61. Torkamani 2010. Torkamani SA, Kangani F, Janani F. The effects of delivery in water on duration of  
34 delivery and pain compared with normal delivery. *Pakistan Journal of Medical*  
35 *Sciences*. 2010;26(3):551-5  
36  
37 62. Ulfsdottir H, Saltvedt S, Georgsson S. Waterbirth in Sweden – a comparative study. *Acta Obstetricia*  
38 *et Gynecologica Scandinavica*. March 2018;97(3):341-348.  
39  
40 63. Woodward J, Kelly SM. A pilot study for a randomised controlled trial of waterbirth versus land  
41 birth. *BJOG*. 2004;111(6):537-545. doi:10.1111/j.1471-0528.2004.00132.x  
42  
43 64. Zanetti-Dällenbach R, Lapaire O, Maertens A, Holzgreve W, Hösli I. Water birth, more than a trendy  
44 alternative: A prospective, observational study. *Archives of Gynecology and Obstetrics*. October  
45 2006;274(6):355-365.  
46  
47 65. Zanetti-Daellenbach RA, Tschudin S, Zhong XY, Holzgreve W, Lapaire O, Hösli I. Maternal and  
48 neonatal infections and obstetrical outcome in water birth. *European Journal of Obstetrics and*  
49 *Gynecology and Reproductive Biology*. 2007; 134(1):37-43.  
50  
51  
52  
53  
54  
55  
56  
57  
58  
59  
60

- 1  
2  
3 66. Ziolkowski R, Dabrus D, Czerniawski W, Dudek K, Darmochwal-Kolarz D, Oleszczuk J. An  
4 assessment of water births based on the author's own research *Ginekologia i Poloznictwo*. 2009;  
5 14(4):57-65.  
6  
7  
8 67. Alliman J, Stapleton SR, Wright J, Bauer K, Slider K, Jolles D. Strong Start in birth centers: Socio-  
9 demographic characteristics, care processes, and outcomes for mothers and newborns. *Birth*. June  
10 2019; 46(2):234-243.  
11  
12 68. Koto PS, Fahey J, Meier D, Ledrew M, Loring S. Relative effectiveness and cost-effectiveness of the  
13 midwifery-led care in Nova Scotia, Canada: A retrospective, cohort study. *Midwifery*. 2019; 77:144-  
14 154.  
15  
16 69. Scarf VL, Rossiter C, Vedam S, et al. Maternal and perinatal outcomes by planned place of birth  
17 among women with low-risk pregnancies in high-income countries: A systematic review and meta-  
18 analysis. *Midwifery*. 2018; 62:240-255. doi:10.1016/j.midw.2018.03.024  
19  
20 70. He S, Jiang H, Qian X, Garner P. Women's experience of episiotomy: A qualitative study from China.  
21 *BMJ Open*. July 2020;10(7). <https://bmjopen.bmj.com/content/10/7/e033354>  
22  
23 71. Jiang H, Qian X, Carroli G, Garner P. Selective versus routine use of episiotomy for vaginal birth.  
24 *Cochrane Database of Systematic Reviews*. February 2017; Issue 2  
25 <https://www.cochranelibrary.com/cdsr/doi/10.1002/14651858.CD000081.pub3/full>  
26  
27 72. Burns E, Price L, Carpenter J, Smith L. Predictors of obstetric anal sphincter injury during waterbirth:  
28 a secondary analysis of a prospective observational study. *International Urogynecology Journal*.  
29 March 2020; 31(3):651-656.  
30  
31 73. Dahlen HG, Dowling H, Tracy M, Schmied V, Tracy S. Maternal and perinatal outcomes amongst low  
32 risk women giving birth in water compared to six birth positions on land. A descriptive cross sectional  
33 study in a birth centre over 12 years. *Midwifery*. July 2013; 29(7):759-764.  
34  
35 74. Aughey, H., Jardine, J., Moitt, N. *et al*. Waterbirth: a national retrospective cohort study of factors  
36 associated with its use among women in England. *BMC Pregnancy Childbirth* **21**, 256 (2021).  
37 <https://doi.org/10.1186/s12884-021-03724-6>  
38  
39 75. Cro S, Preston J. Cord snapping at waterbirth delivery. *British Journal of Midwifery*. August 2002;  
40 10(8):494-497.  
41  
42 76. Vanderlaan J, Hall P. Systematic Review of Case Reports of Poor Neonatal Outcomes With Water  
43 Immersion During Labor and Birth. *Journal of Perinatal & Neonatal Nursing*. October 2020;  
44 34(4):311-323.  
45  
46 77. World Health Organization. WHO recommendations: intrapartum care for a positive childbirth  
47 experience 2018. <https://www.who.int/publications/i/item/9789241550215>  
48  
49  
50  
51  
52  
53  
54  
55  
56  
57  
58  
59  
60

- 1  
2  
3 78. Prosser, S.J., Barnett, A.G. & Miller, Y.D. Factors promoting or inhibiting normal birth. *BMC*  
4 *Pregnancy Childbirth* **18**, 241 (2018). <https://doi.org/10.1186/s12884-018-1871-5>  
5  
6 79. Supporting Healthy and Normal Physiologic Childbirth: A Consensus Statement by ACNM, MANA,  
7 and NACPM. *J Perinat Educ.* 2013;22(1):14-18. doi:10.1891/1058-1243.22.1.14, MANA, and  
8 NACPM 2013. 1058-1243  
9  
10 80. National Childbirth Trust. Normal birth as a measure of the quality of care 2010.  
11  
12 [https://www.nct.org.uk/sites/default/files/related\\_documents/Normalbirthasameasureofthequalityofcar](https://www.nct.org.uk/sites/default/files/related_documents/NormalbirthasameasureofthequalityofcareV3.pdf)  
13 [eV3.pdf](https://www.nct.org.uk/sites/default/files/related_documents/NormalbirthasameasureofthequalityofcareV3.pdf)  
14  
15 81. International Confederation of Midwives. Keeping Birth Normal 2014.  
16  
17 [https://www.internationalmidwives.org/assets/files/statement-files/2018/04/keeping-birth-normal-](https://www.internationalmidwives.org/assets/files/statement-files/2018/04/keeping-birth-normal-eng.pdf)  
18 [eng.pdf](https://www.internationalmidwives.org/assets/files/statement-files/2018/04/keeping-birth-normal-eng.pdf)  
19  
20 82. Smith LA, Burns E, Cuthbert A. Parenteral opioids for maternal pain management in labour. *Cochrane*  
21 *Database Syst Rev.* 2018;6(6):CD007396. Published 2018 Jun 5.  
22  
23 doi:10.1002/14651858.CD007396.pub3  
24  
25 83. Moran VH, Thomson G, Cook J, et al. Qualitative exploration of women's experiences of  
26 intramuscular pethidine or remifentanyl patient-controlled analgesia for labour pain. *BMJ Open.*  
27 December 2019;9(12). <https://bmjopen.bmj.com/content/bmjopen/9/12/e032203.full.pdf>  
28  
29 84. Fleet JA, Jones M, Belan I. The influence of intrapartum opioid use on breastfeeding experience at 6  
30 weeks post partum: A secondary analysis. *Midwifery.* 2017;50:106-109.  
31  
32 doi:10.1016/j.midw.2017.03.024  
33  
34 85. Penuela, I., Isasi-Nebreda, P., Almeida, H. *et al.* Epidural analgesia and its implications in the  
35 maternal health in a low parity community. *BMC Pregnancy Childbirth* **19**, 52 (2019).  
36  
37 <https://doi.org/10.1186/s12884-019-2191-0>  
38  
39 82. Newnham EC, Moran PS, Begley CM, Carroll M, Daly D. Comparison of labour and birth outcomes  
40 between nulliparous women who used epidural analgesia in labour and those who did not: A  
41 prospective cohort study [published online ahead of print, 2020 Sep 11]. *Women Birth.* 2020;S1871-  
42 5192(20)30318-8. doi:10.1016/j.wombi.2020.09.001  
43  
44 83. Kjærgaard, H., Olsen, J., Ottesen, B. *et al.* Obstetric risk indicators for labour dystocia in nulliparous  
45 women: A multi-centre cohort study. *BMC Pregnancy Childbirth* **8**, 45 (2008).  
46  
47 <https://doi.org/10.1186/1471-2393-8-45>  
48  
49 84. Anim-Somuah M, Smyth RM, Cyna AM, Cuthbert A. Epidural versus non-epidural or no  
50 analgesia for pain management in labour. *Cochrane Database of Systematic Reviews* 2018. May  
51 21;5(5):CD000331. doi: 10.1002/14651858.CD000331.pub4.  
52  
53  
54  
55  
56  
57  
58  
59  
60

- 1  
2  
3 85. Sandall J, Soltani H, Gates S, Shennan A, Devane D. Midwife-led continuity models versus other  
4 models of care for childbearing women. Cochrane Database of Systematic Reviews 2016, Issue 4. Art.  
5 No.: CD004667. DOI: 10.1002/14651858.CD004667.pub5  
6  
7  
8  
9  
10  
11  
12  
13  
14  
15  
16  
17  
18  
19  
20  
21  
22  
23  
24  
25  
26  
27  
28  
29  
30  
31  
32  
33  
34  
35  
36  
37  
38  
39  
40  
41  
42  
43  
44  
45  
46  
47  
48  
49  
50  
51  
52  
53  
54  
55  
56  
57  
58  
59  
60

For peer review only

1  
2  
3  
4  
5  
6  
7  
8  
9  
10  
11  
12  
13  
14  
15  
16  
17  
18  
19  
20  
21  
22  
23  
24  
25  
26  
27  
28  
29  
30  
31  
32  
33  
34  
35  
36  
37  
38  
39  
40  
41  
42  
43  
44  
45  
46  
47  
48  
49  
50  
51  
52  
53  
54  
55  
56  
57  
58  
59  
60

For peer review only

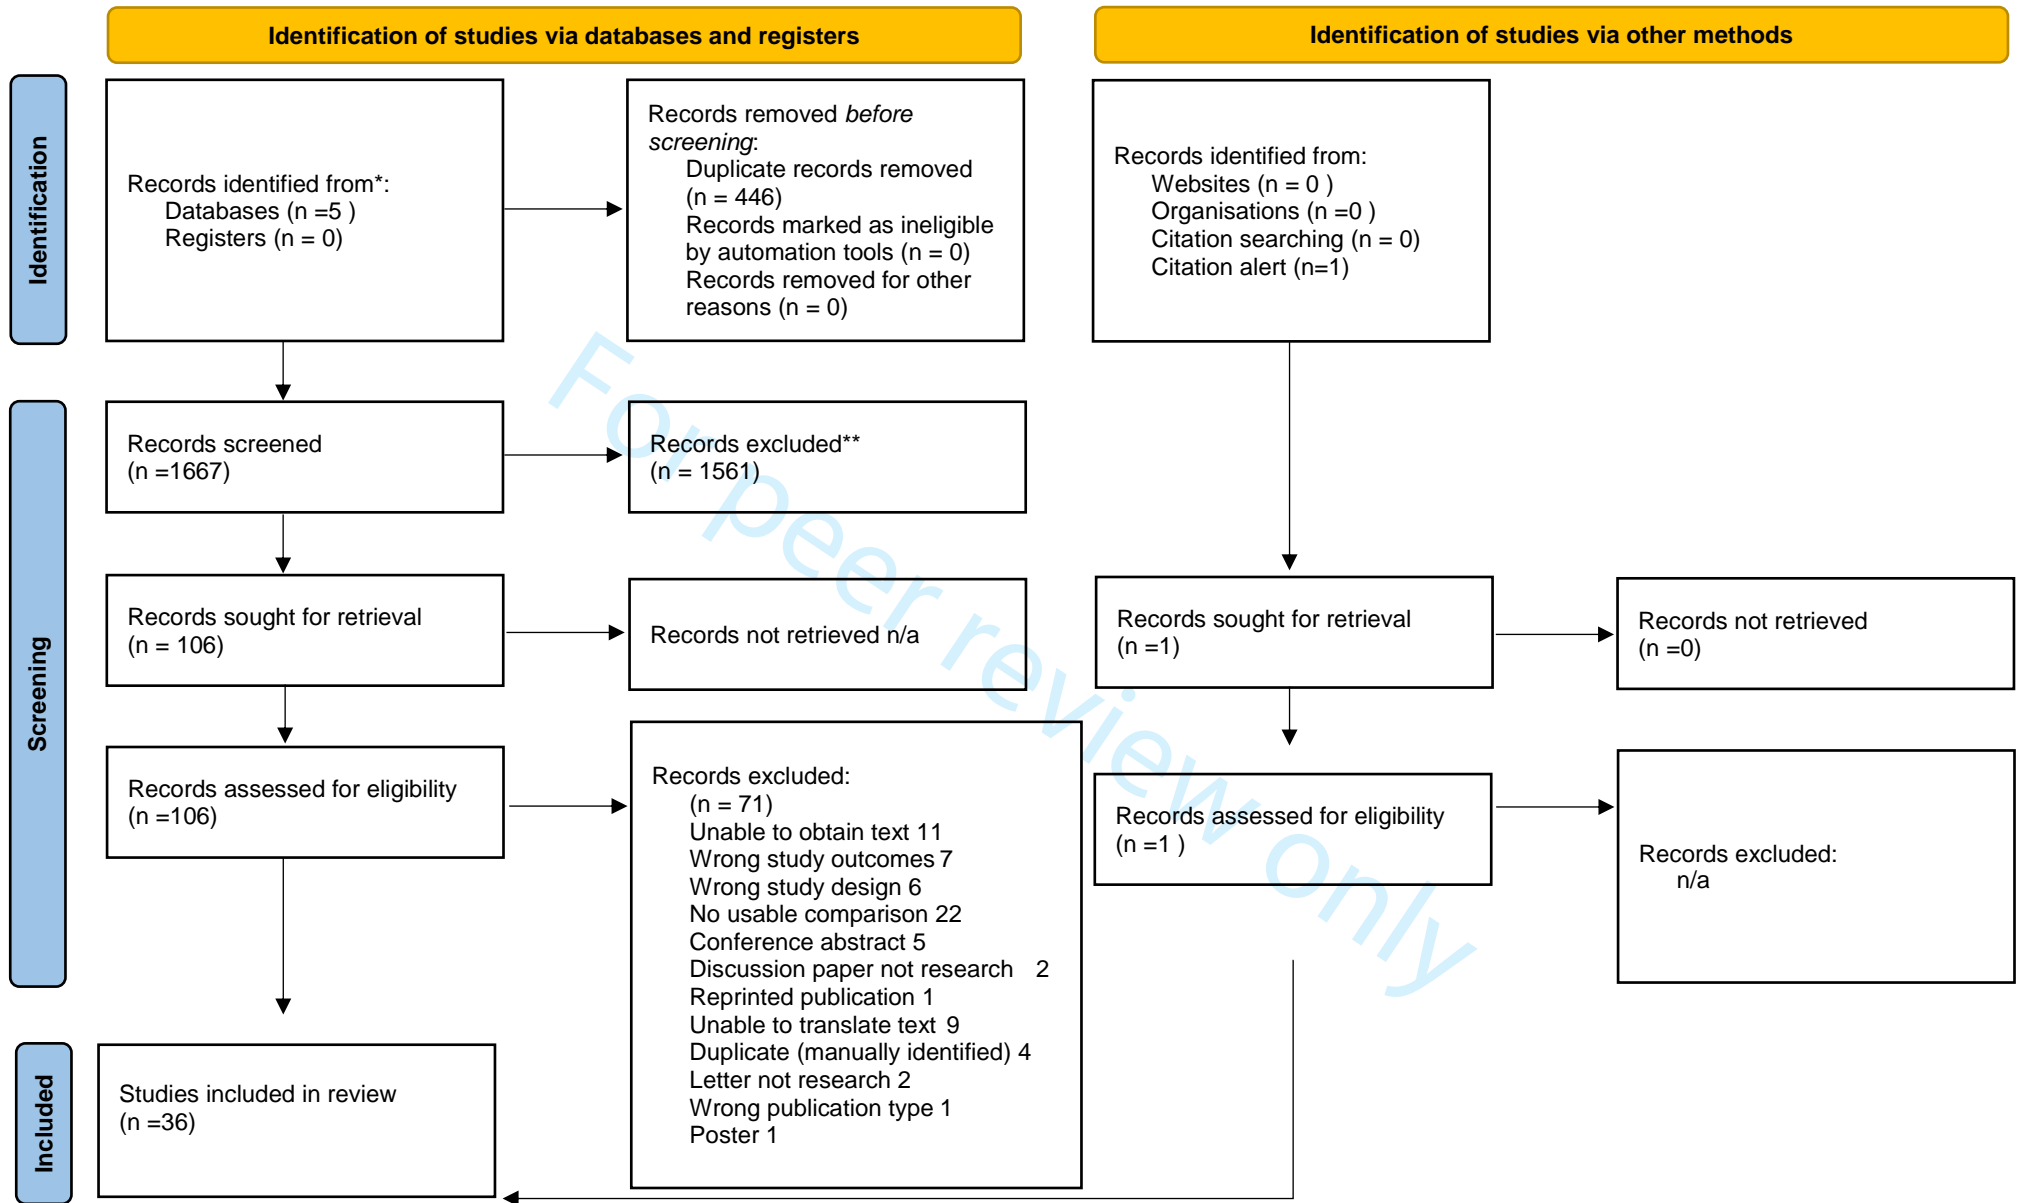

Figure 1 PRISMA 2020 flow diagram for new systematic reviews which included searches of databases, registers and other sources



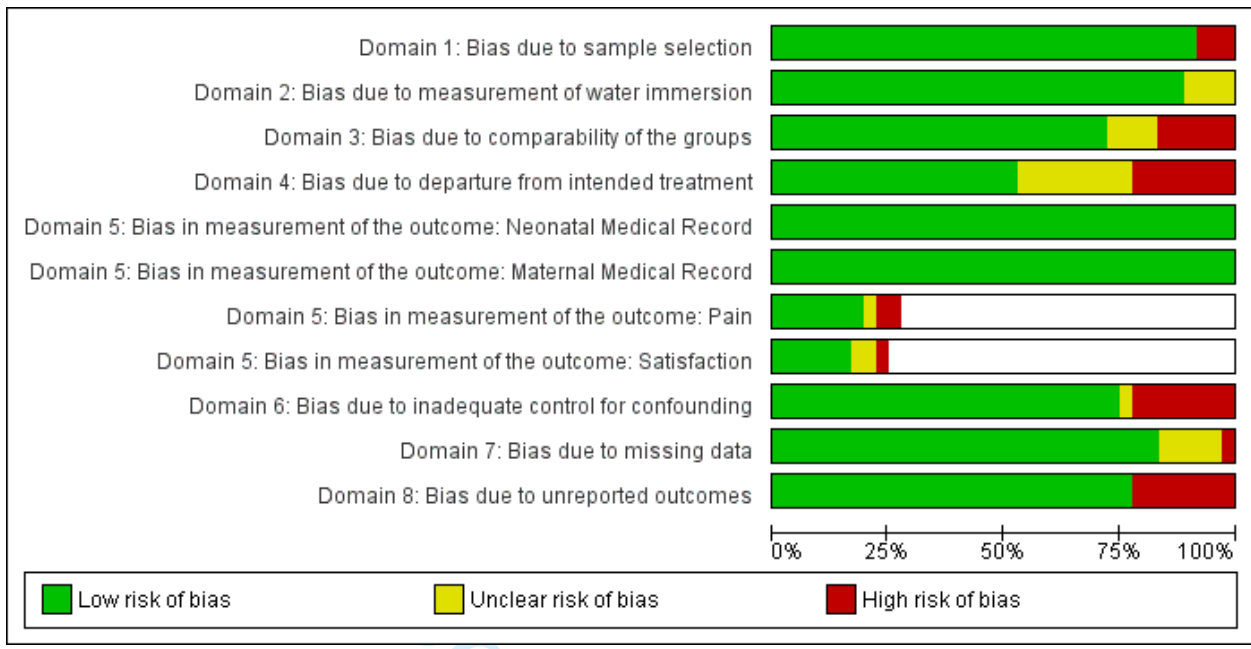

Figure 2 Risk of bias assessment

Figure 3 Forest Plot of Synthesis of Labour Induction

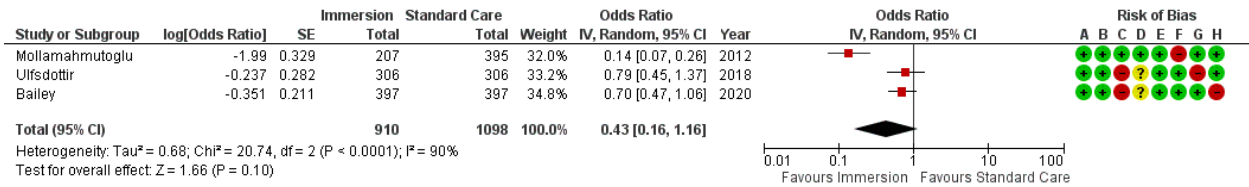

Risk of bias legend

- (A) Domain 1: Bias due to sample selection
- (B) Domain 2: Bias due to measurement of water immersion
- (C) Domain 3: Bias due to comparability of the groups
- (D) Domain 4: Bias due to departure from intended treatment
- (E) Domain 5: Bias in measurement of the outcome: Maternal Medical Record
- (F) Domain 6: Bias due to inadequate control for confounding
- (G) Domain 7: Bias due to missing data
- (H) Domain 8: Bias due to unreported outcomes

For peer review only

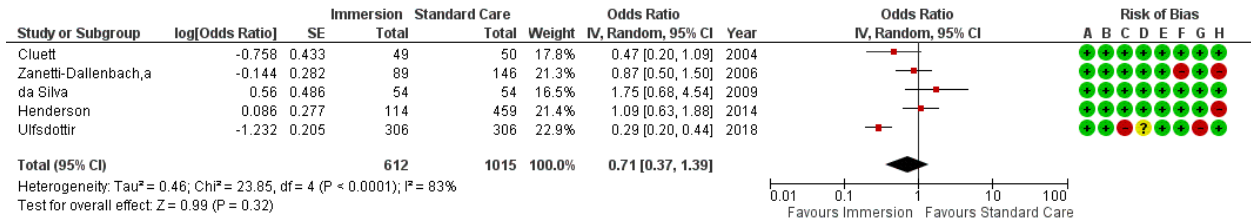

Risk of bias legend

- (A) Domain 1: Bias due to sample selection
- (B) Domain 2: Bias due to measurement of water immersion
- (C) Domain 3: Bias due to comparability of the groups
- (D) Domain 4: Bias due to departure from intended treatment
- (E) Domain 5: Bias in measurement of the outcome: Maternal Medical Record
- (F) Domain 6: Bias due to inadequate control for confounding
- (G) Domain 7: Bias due to missing data
- (H) Domain 8: Bias due to unreported outcomes

Figure 4 Forest Plot of Synthesis of Amniotomy

For peer review only



Risk of bias legend

- (A) Domain 1: Bias due to sample selection
- (B) Domain 2: Bias due to measurement of water immersion
- (C) Domain 3: Bias due to comparability of the groups
- (D) Domain 4: Bias due to departure from intended treatment
- (E) Domain 5: Bias in measurement of the outcome: Maternal Medical Record
- (F) Domain 6: Bias due to inadequate control for confounding
- (G) Domain 7: Bias due to missing data
- (H) Domain 8: Bias due to unreported outcomes

Figure 5 Forest Plot of Synthesis of Augmentation of Labour

For peer review only

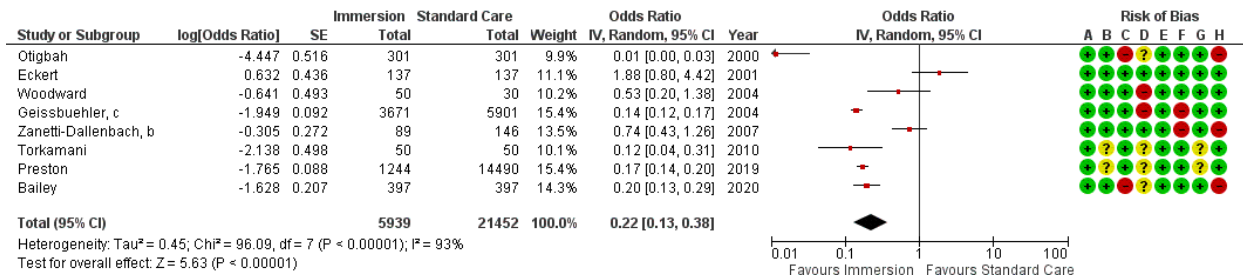

Risk of bias legend  
 (A) Domain 1: Bias due to sample selection  
 (B) Domain 2: Bias due to measurement of water immersion  
 (C) Domain 3: Bias due to comparability of the groups  
 (D) Domain 4: Bias due to departure from intended treatment  
 (E) Domain 5: Bias in measurement of the outcome: Maternal Medical Record  
 (F) Domain 6: Bias due to inadequate control for confounding  
 (G) Domain 7: Bias due to missing data  
 (H) Domain 8: Bias due to unreported outcomes

Figure 6 Forest Plot of Synthesis of Opioid Use

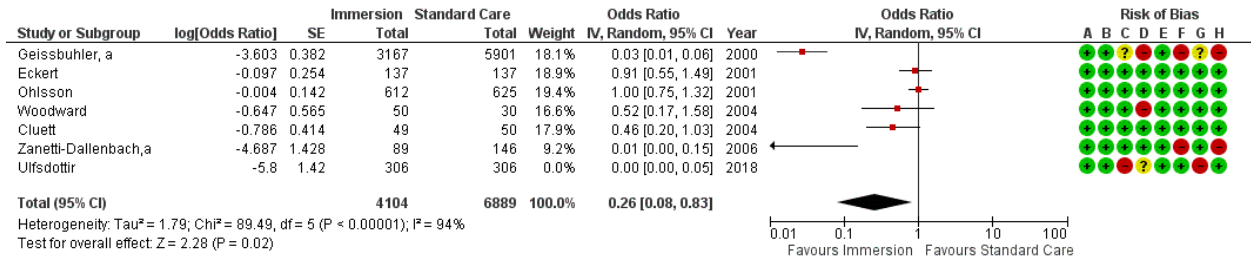

Risk of bias legend

- (A) Domain 1: Bias due to sample selection
- (B) Domain 2: Bias due to measurement of water immersion
- (C) Domain 3: Bias due to comparability of the groups
- (D) Domain 4: Bias due to departure from intended treatment
- (E) Domain 5: Bias in measurement of the outcome: Maternal Medical Record
- (F) Domain 6: Bias due to inadequate control for confounding
- (G) Domain 7: Bias due to missing data
- (H) Domain 8: Bias due to unreported outcomes

Figure 7 Forest Plot of Synthesis of Epidural Use

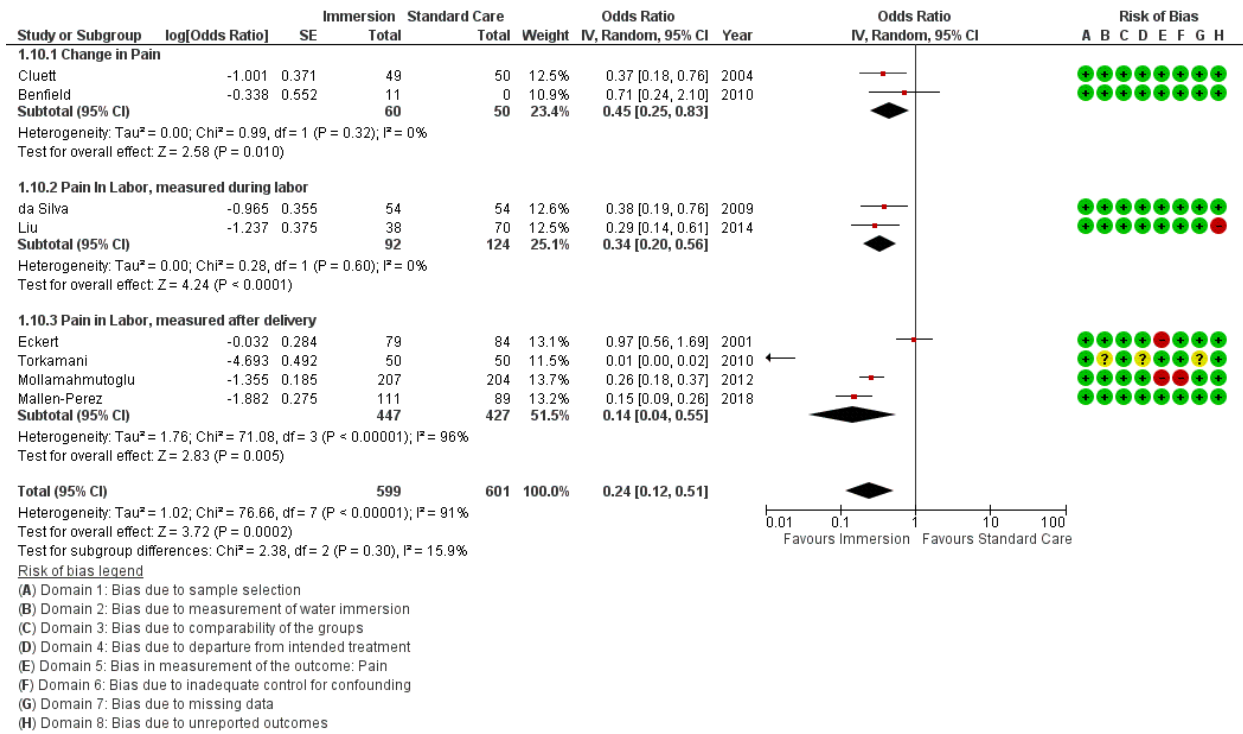

Figure 8 Forest Plot of Synthesis of Pain



Figure 9 Forest Plot of Synthesis of Cesarean Delivery



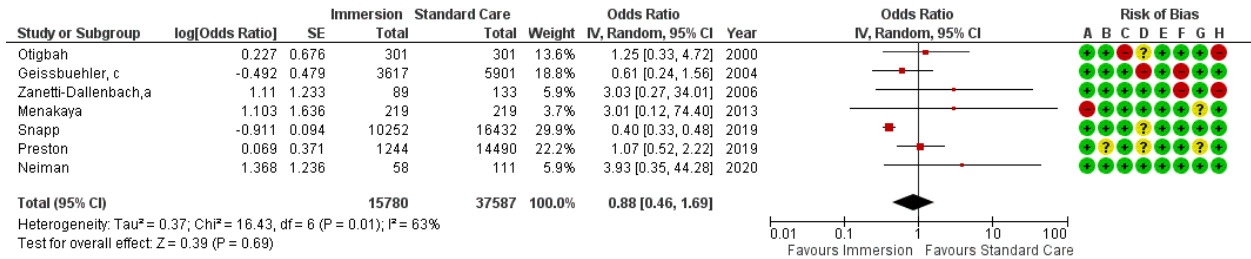

Risk of bias legend

- (A) Domain 1: Bias due to sample selection
- (B) Domain 2: Bias due to measurement of water immersion
- (C) Domain 3: Bias due to comparability of the groups
- (D) Domain 4: Bias due to departure from intended treatment
- (E) Domain 5: Bias in measurement of the outcome: Maternal Medical Record
- (F) Domain 6: Bias due to inadequate control for confounding
- (G) Domain 7: Bias due to missing data
- (H) Domain 8: Bias due to unreported outcomes

Figure 10 Forest Plot of Synthesis of Shoulder Dystocia

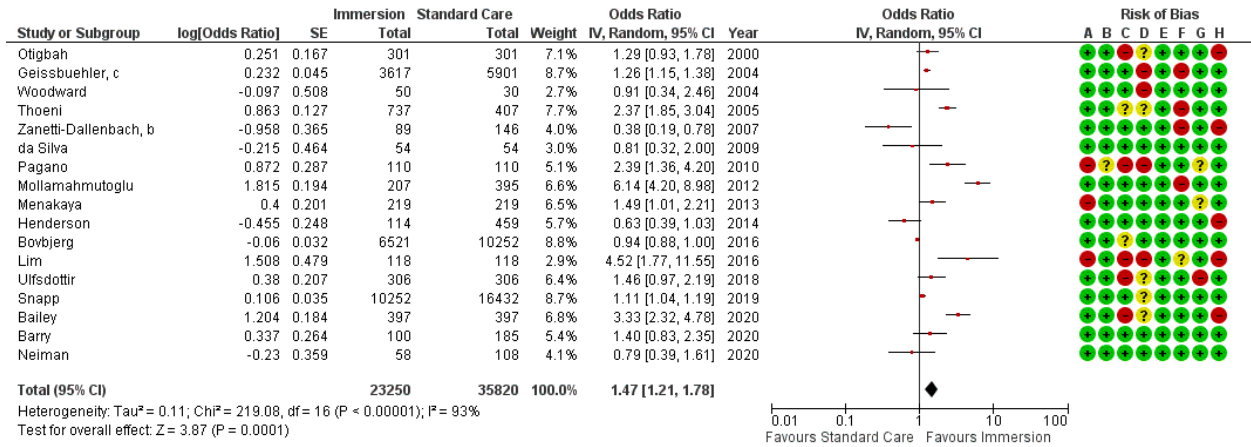

Risk of bias legend  
 (A) Domain 1: Bias due to sample selection  
 (B) Domain 2: Bias due to measurement of water immersion  
 (C) Domain 3: Bias due to comparability of the groups  
 (D) Domain 4: Bias due to departure from intended treatment  
 (E) Domain 5: Bias in measurement of the outcome: Maternal Medical Record  
 (F) Domain 6: Bias due to inadequate control for confounding  
 (G) Domain 7: Bias due to missing data  
 (H) Domain 8: Bias due to unreported outcomes

Figure 11 Forest Plot of Synthesis of Intact Perineum

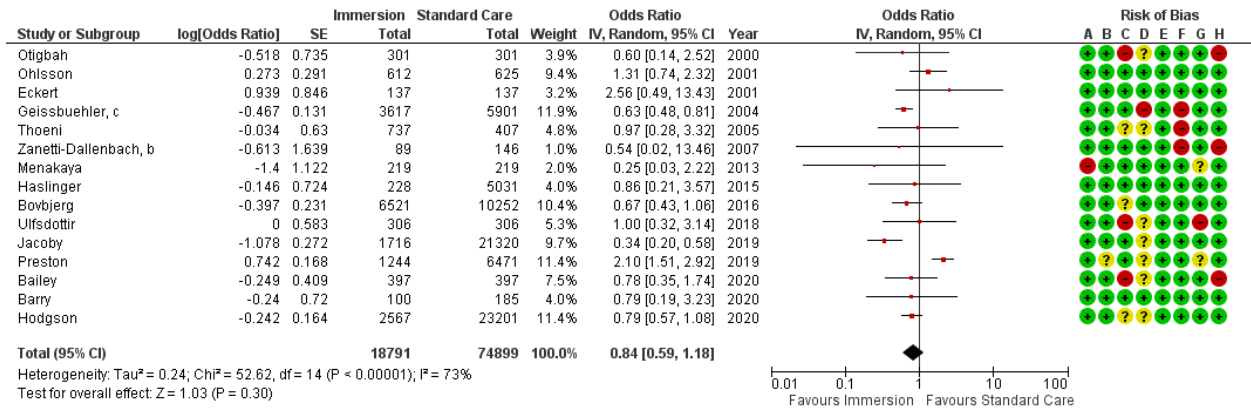

Risk of bias legend

- (A) Domain 1: Bias due to sample selection
- (B) Domain 2: Bias due to measurement of water immersion
- (C) Domain 3: Bias due to comparability of the groups
- (D) Domain 4: Bias due to departure from intended treatment
- (E) Domain 5: Bias in measurement of the outcome: Maternal Medical Record
- (F) Domain 6: Bias due to inadequate control for confounding
- (G) Domain 7: Bias due to missing data
- (H) Domain 8: Bias due to unreported outcomes

Figure 12 Forest Plot of Synthesis of Obstetric Anal Sphincter Injuries (OASI)

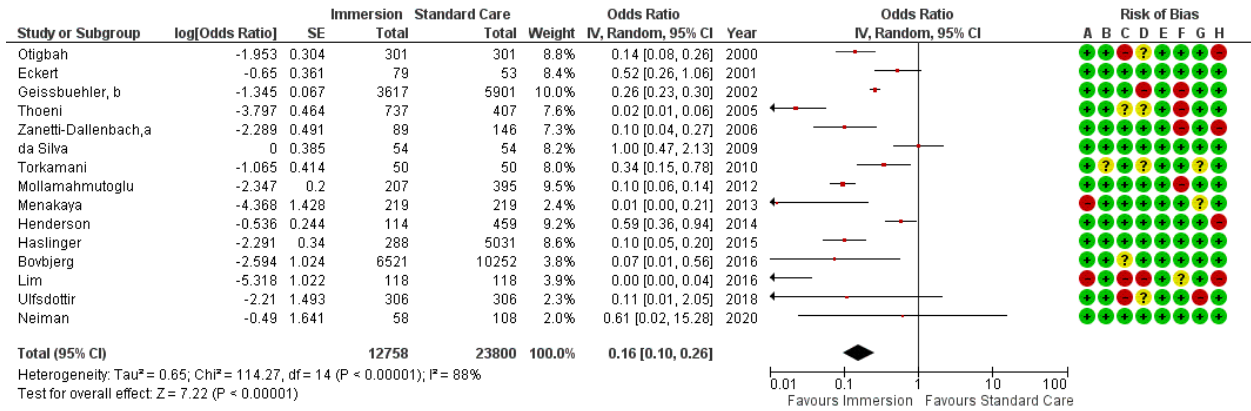

**Risk of bias legend**  
 (A) Domain 1: Bias due to sample selection  
 (B) Domain 2: Bias due to measurement of water immersion  
 (C) Domain 3: Bias due to comparability of the groups  
 (D) Domain 4: Bias due to departure from intended treatment  
 (E) Domain 5: Bias in measurement of the outcome: Maternal Medical Record  
 (F) Domain 6: Bias due to inadequate control for confounding  
 (G) Domain 7: Bias due to missing data  
 (H) Domain 8: Bias due to unreported outcomes

Figure 13 Forest Plot of Synthesis of Episiotomy



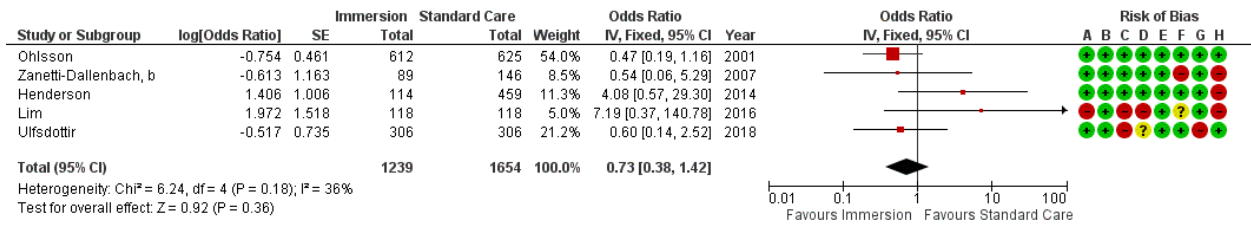

Risk of bias legend

- (A) Domain 1: Bias due to sample selection
- (B) Domain 2: Bias due to measurement of water immersion
- (C) Domain 3: Bias due to comparability of the groups
- (D) Domain 4: Bias due to departure from intended treatment
- (E) Domain 5: Bias in measurement of the outcome: Maternal Medical Record
- (F) Domain 6: Bias due to inadequate control for confounding
- (G) Domain 7: Bias due to missing data
- (H) Domain 8: Bias due to unreported outcomes

Figure 15 Forest Plot of Synthesis of Manual Removal of the Placenta

For peer review only

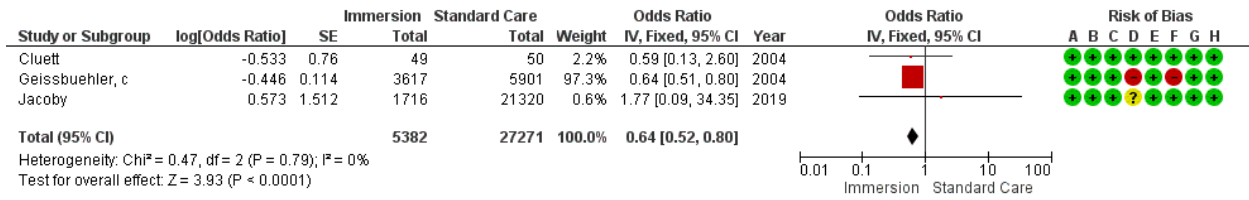

Risk of bias legend

- (A) Domain 1: Bias due to sample selection
- (B) Domain 2: Bias due to measurement of water immersion
- (C) Domain 3: Bias due to comparability of the groups
- (D) Domain 4: Bias due to departure from intended treatment
- (E) Domain 5: Bias in measurement of the outcome: Maternal Medical Record
- (F) Domain 6: Bias due to inadequate control for confounding
- (G) Domain 7: Bias due to missing data
- (H) Domain 8: Bias due to unreported outcomes

Figure 16 Forest Plot of Synthesis for Maternal Infection

For peer review only

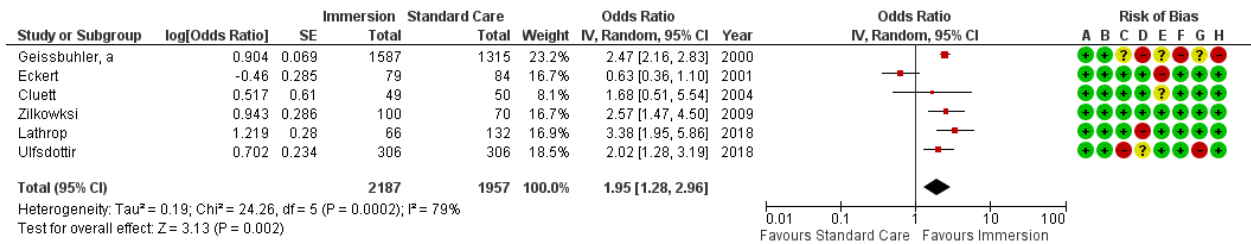

Risk of bias legend  
 (A) Domain 1: Bias due to sample selection  
 (B) Domain 2: Bias due to measurement of water immersion  
 (C) Domain 3: Bias due to comparability of the groups  
 (D) Domain 4: Bias due to departure from intended treatment  
 (E) Domain 5: Bias in measurement of the outcome: Satisfaction  
 (F) Domain 6: Bias due to inadequate control for confounding  
 (G) Domain 7: Bias due to missing data  
 (H) Domain 8: Bias due to unreported outcomes

Figure 17 Forest Plot of Synthesis of Maternal Satisfaction Measures



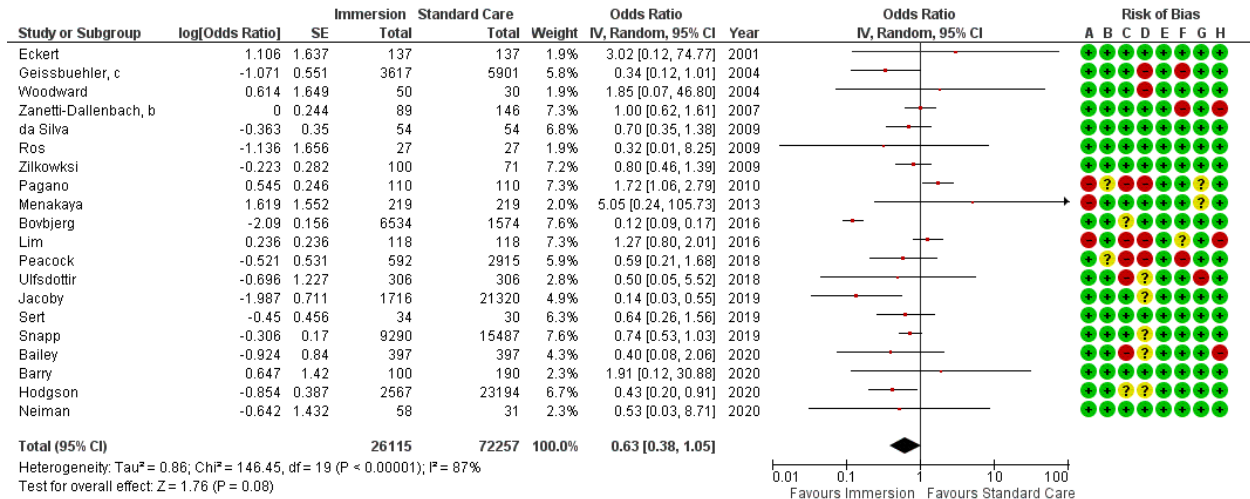

Figure 18 Forest Plot of Synthesis of 5-Minute APGAR



Risk of bias legend  
 (A) Domain 1: Bias due to sample selection  
 (B) Domain 2: Bias due to measurement of water immersion  
 (C) Domain 3: Bias due to comparability of the groups  
 (D) Domain 4: Bias due to departure from intended treatment  
 (E) Domain 5: Bias in measurement of the outcome: Neonatal Medical Record  
 (F) Domain 6: Bias due to inadequate control for confounding  
 (G) Domain 7: Bias due to missing data  
 (H) Domain 8: Bias due to unreported outcomes

Figure 19 Forest Plot of Synthesis of Neonatal Resuscitation

For peer review only

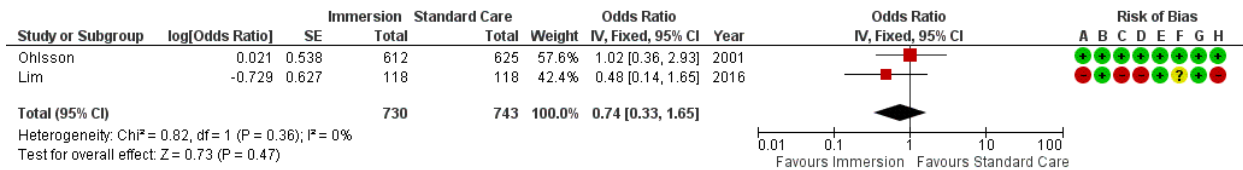

Risk of bias legend

- (A) Domain 1: Bias due to sample selection
- (B) Domain 2: Bias due to measurement of water immersion
- (C) Domain 3: Bias due to comparability of the groups
- (D) Domain 4: Bias due to departure from intended treatment
- (E) Domain 5: Bias in measurement of the outcome: Neonatal Medical Record
- (F) Domain 6: Bias due to inadequate control for confounding
- (G) Domain 7: Bias due to missing data
- (H) Domain 8: Bias due to unreported outcomes

Figure 20 Forest Plot of Synthesis of Transient Tachypnea of the Newborn

For peer review only



Risk of bias legend

- (A) Domain 1: Bias due to sample selection
- (B) Domain 2: Bias due to measurement of water immersion
- (C) Domain 3: Bias due to comparability of the groups
- (D) Domain 4: Bias due to departure from intended treatment
- (E) Domain 5: Bias in measurement of the outcome: Neonatal Medical Record
- (F) Domain 6: Bias due to inadequate control for confounding
- (G) Domain 7: Bias due to missing data
- (H) Domain 8: Bias due to unreported outcomes

Figure 21 Forest plot of Synthesis of Respiratory Distress

For peer review only

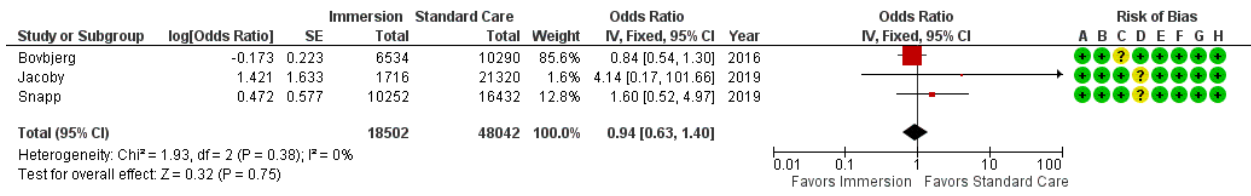

Risk of bias legend  
 (A) Domain 1: Bias due to sample selection  
 (B) Domain 2: Bias due to measurement of water immersion  
 (C) Domain 3: Bias due to comparability of the groups  
 (D) Domain 4: Bias due to departure from intended treatment  
 (E) Domain 5: Bias in measurement of the outcome: Neonatal Medical Record  
 (F) Domain 6: Bias due to inadequate control for confounding  
 (G) Domain 7: Bias due to missing data  
 (H) Domain 8: Bias due to unreported outcomes

Figure 22 Forest Plot of Synthesis of Neonatal Death

For peer review only



**Risk of bias legend**  
 (A) Domain 1: Bias due to sample selection  
 (B) Domain 2: Bias due to measurement of water immersion  
 (C) Domain 3: Bias due to comparability of the groups  
 (D) Domain 4: Bias due to departure from intended treatment  
 (E) Domain 5: Bias in measurement of the outcome: Maternal Medical Record  
 (F) Domain 6: Bias due to inadequate control for confounding  
 (G) Domain 7: Bias due to missing data  
 (H) Domain 8: Bias due to unreported outcomes

Figure 23 Forest Plot of Synthesis of Cord Avulsion

For peer review only

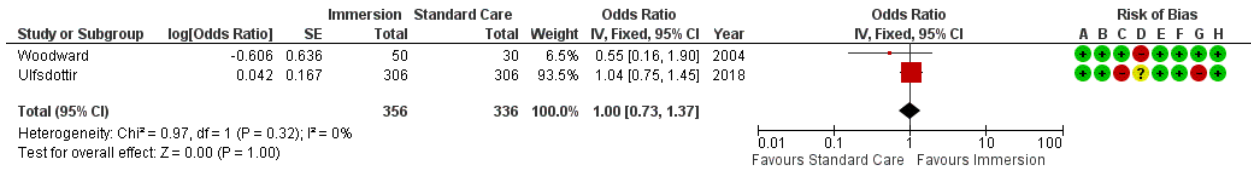

Risk of bias legend

- (A) Domain 1: Bias due to sample selection
- (B) Domain 2: Bias due to measurement of water immersion
- (C) Domain 3: Bias due to comparability of the groups
- (D) Domain 4: Bias due to departure from intended treatment
- (E) Domain 5: Bias in measurement of the outcome: Neonatal Medical Record
- (F) Domain 6: Bias due to inadequate control for confounding
- (G) Domain 7: Bias due to missing data
- (H) Domain 8: Bias due to unreported outcomes

Figure 24 Forest Plot of Synthesis of Breastfeeding Initiation

For peer review only

## Supplement 1 Search Information

## Pre-designed search terms

|                             |                                                                                                                                                                                                                                                                                                                                                                                                                                                                                                                                                                  |
|-----------------------------|------------------------------------------------------------------------------------------------------------------------------------------------------------------------------------------------------------------------------------------------------------------------------------------------------------------------------------------------------------------------------------------------------------------------------------------------------------------------------------------------------------------------------------------------------------------|
| Population                  | Primip* OR nullip* OR multip* OR term gestation* OR intra?partum OR birth* OR childbirth OR labo?r* OR parturition OR planned place birth* OR childbearing wom?n OR expectant wom?n OR expectant mother* OR labo?ring wom?n OR wom?n in labo?r                                                                                                                                                                                                                                                                                                                   |
| Intervention/Exposure water | Water OR water?birth OR water birth OR water immersion OR hydrotherapy OR birth* pool OR birth in water OR birth in pool                                                                                                                                                                                                                                                                                                                                                                                                                                         |
| Interventions during labour | Rupture membrane* OR spontaneous* OR artificial* OR augment*OR induc* OR epidural* OR oxytocin infusion OR opioid injection* OR transfer* OR transfer obstetric unit* OR electronic monitor* OR EFM OR cardiotocograph* OR auscultat* OR intermediate auscultate* OR physiological third stage OR expectant third stage OR physiological 3 <sup>rd</sup> stage OR expectant 3 <sup>rd</sup> stage OR managed third stage OR managed 3 <sup>rd</sup> stage OR active third stage OR active 3 <sup>rd</sup> stage OR placenta delivery OR delivery of the placenta |
| Outcomes Maternal           | spontaneous vaginal birth* OR spont* delivery OR perine* OR perineal OR trauma* OR anal sphincter OR OASIS OR obstetric anal sphincter injur* OR episiotom* OR postpartum h?emorrhage* OR PPH OR h?emorrhage* OR blood transfusion* OR blood product* OR red blood cell* OR infection* OR sepsis OR admission* OR readmission* OR pain OR numerical rating scales OR NRS OR visual analog scales OR VAS OR maternal health OR wom?n health                                                                                                                       |
| Outcomes Neonatal           | birthweight* OR gestation* OR Apgar score* OR resus* OR resuscitation OR ventilation* OR respiratory OR distress* OR transfer* OR transfer obstetric unit* OR paed* OR neonat* OR neonatal unit OR special care unit* OR antibiotic* OR admission* OR readmission* OR breastfeeding OR infection* OR sepsis OR antibiotic* OR new?born health OR neonat* health                                                                                                                                                                                                  |
| Time                        | Intrapartum OR intra?partum OR birth* OR child?birth OR labo?r* OR post?natal OR post?partum OR puerperium*                                                                                                                                                                                                                                                                                                                                                                                                                                                      |



### Pilot Search Terms

Population: Primip\* OR nullip\* OR multip\* OR parturient OR birth\* wom?n

Exposure : Water OR waterbirth OR water birth OR water immersion OR immersion OR hydrotherapy OR birth\* pool OR tub

Time: Intrapartum OR intra-partum OR birth\* OR childbirth OR labour\* OR labor\* OR parturition OR dilatation OR expulsion OR delivery of the placenta OR first stage OR second stage OR third stag

### Librarian Search Term Input

BNI (via Proquest)

S1 ab(Intrapartum OR intra-partum OR labor OR laboring OR labour OR labouring OR deliver\* OR childbirth\* OR birth\* OR parturition) OR ti(Intrapartum OR intra-partum OR labor OR laboring OR labour OR labouring OR deliver\* OR childbirth\* OR birth\* OR parturition) 98,180

S2 MAINSUBJECT.EXACT("Childbirth & labor") 12,308

S3 S1 OR S2 100,458

S4 ab((Water N/3 birth) OR waterbirth OR water-birth OR (birth\* N/3 tub) OR (birth\*N/3 pool\*) OR (water N/3 immersion)) OR ti((Water N/3 birth) OR waterbirth OR water-birth OR (birth\* N/3 tub) OR (birth\* N/3 pool\*) OR (water N/3 immersion)) 501

S5 S3 AND S4 424

CINAHL (via Ebscohost)

S1 TI ( Intrapartum OR intra-partum OR labor OR laboring OR labour OR labouring OR deliver\* OR childbirth\* OR birth\* OR parturition ) OR AB ( Intrapartum OR intra-partum OR labor OR laboring OR labour OR labouring OR deliver\* OR childbirth\* OR birth\* OR parturition ) 252,840

S2 (MH "Childbirth+") OR (MH "Labor+") 36,176

S3 S1 OR S2 263,207

S4 TI ( (Water N3 birth) OR waterbirth OR water-birth OR (birth\* N3 tub) OR (birth\* N3 pool\*) OR (water N3 immersion) ) OR AB ( (Water N3 birth) OR waterbirth OR water-birth OR (birth\* N3 tub) OR (birth\* N3 pool\*) OR (water N3 immersion) ) 1,264

S5 (MH "Water Birth") 600

S6 S4 OR S5 1,572

S7 S3 AND S6 824

PsycInfo (via Ebscohost)

S1 TI ( Intrapartum OR intra-partum OR labor OR laboring OR labour OR labouring OR deliver\* OR childbirth\* OR birth\* OR parturition ) OR AB ( Intrapartum OR intra-partum OR labor OR laboring OR labour OR labouring OR deliver\* OR childbirth\* OR birth\* OR parturition ) 187,428

S2 DE "Intrapartum Period" OR DE "Birth" OR DE "Labor (Childbirth)" OR DE "Natural Childbirth" OR DE "Premature Birth" 14,070

S3 S1 OR S2 190,598

S4 TI ( (Water N3 birth) OR waterbirth OR water-birth OR (birth\* N3 tub) OR (birth\* N3 pool\*) OR (water N3 immersion) ) OR AB ( (Water N3 birth) OR waterbirth OR water-birth OR (birth\* N3 tub) OR (birth\* N3 pool\*) OR (water N3 immersion) ) 461

S5 S3 AND S4 68

Medline (via Ebscohost)

S1 TI ( Intrapartum OR intra-partum OR labor OR laboring OR labour OR labouring OR deliver\* OR childbirth\* OR birth\* OR parturition ) OR AB ( Intrapartum OR intra-partum OR labor OR laboring OR labour OR labouring OR deliver\* OR childbirth\* OR birth\* OR parturition ) 971,137

S2 (MH "Parturition+") OR (MH "Labor, Obstetric+") 60,186

S3 S1 OR S2 989,569

S4 TI ( (Water N3 birth) OR waterbirth OR water-birth OR (birth\* N3 tub) OR (birth\* N3 pool\*) OR (water N3 immersion) ) OR AB ( (Water N3 birth) OR waterbirth OR water-birth OR (birth\* N3 tub) OR (birth\* N3 pool\*) OR (water N3 immersion) ) 6,075

S5 S3 AND S4 892

CINAHL Search

[Accessibility Information and Tips](#) Revised Date: 07/2015

[Print Search History](#)

Monday, March 09, 2020 9:20:23 AM

| #  | Query                                            | Limiters/Expanders                                                                    | Last Run Via                                                                | Results |
|----|--------------------------------------------------|---------------------------------------------------------------------------------------|-----------------------------------------------------------------------------|---------|
| S8 | ((MH water birth) OR (S4 OR S5)) AND (S3 AND S6) | Limiters - Published Date: 20000101-20201231<br>Expanders - Apply equivalent subjects | Interface - EBSCOhost Research Databases<br>Search Screen - Advanced Search | 719     |
|    |                                                  | Search modes - Boolean/Phrase                                                         | Database - CINAHL                                                           |         |
| S7 | ((MH water birth) OR (S4 OR S5)) AND (S3 AND S6) | Expanders - Apply equivalent subjects                                                 | Interface - EBSCOhost Research Databases                                    | 826     |
|    |                                                  | Search modes - Boolean/Phrase                                                         | Search Screen - Advanced Search                                             |         |
|    |                                                  |                                                                                       | Database - CINAHL                                                           |         |

|    |    |                                                                                                                                                                                                                                                      |                                       |                                          |         |
|----|----|------------------------------------------------------------------------------------------------------------------------------------------------------------------------------------------------------------------------------------------------------|---------------------------------------|------------------------------------------|---------|
| 1  |    |                                                                                                                                                                                                                                                      |                                       |                                          |         |
| 2  |    |                                                                                                                                                                                                                                                      |                                       |                                          |         |
| 3  | S6 | (MH water birth) OR (S4 OR S5)                                                                                                                                                                                                                       | Expanders - Apply equivalent subjects | Interface - EBSCOhost Research Databases | 1,577   |
| 4  |    |                                                                                                                                                                                                                                                      |                                       |                                          |         |
| 5  |    |                                                                                                                                                                                                                                                      |                                       |                                          |         |
| 6  |    |                                                                                                                                                                                                                                                      |                                       |                                          |         |
| 7  |    |                                                                                                                                                                                                                                                      |                                       |                                          |         |
| 8  |    |                                                                                                                                                                                                                                                      |                                       |                                          |         |
| 9  |    |                                                                                                                                                                                                                                                      | Search modes - Boolean/Phrase         | Search Screen - Advanced Search          |         |
| 10 |    |                                                                                                                                                                                                                                                      |                                       |                                          |         |
| 11 |    |                                                                                                                                                                                                                                                      |                                       |                                          |         |
| 12 |    |                                                                                                                                                                                                                                                      |                                       |                                          |         |
| 13 |    |                                                                                                                                                                                                                                                      |                                       | Database - CINAHL                        |         |
| 14 |    |                                                                                                                                                                                                                                                      |                                       |                                          |         |
| 15 | S5 | MH water birth                                                                                                                                                                                                                                       | Expanders - Apply equivalent subjects | Interface - EBSCOhost Research Databases | 602     |
| 16 |    |                                                                                                                                                                                                                                                      |                                       |                                          |         |
| 17 |    |                                                                                                                                                                                                                                                      |                                       |                                          |         |
| 18 |    |                                                                                                                                                                                                                                                      |                                       |                                          |         |
| 19 |    |                                                                                                                                                                                                                                                      |                                       |                                          |         |
| 20 |    |                                                                                                                                                                                                                                                      |                                       |                                          |         |
| 21 |    |                                                                                                                                                                                                                                                      | Search modes - Boolean/Phrase         | Search Screen - Advanced Search          |         |
| 22 |    |                                                                                                                                                                                                                                                      |                                       |                                          |         |
| 23 |    |                                                                                                                                                                                                                                                      |                                       |                                          |         |
| 24 |    |                                                                                                                                                                                                                                                      |                                       |                                          |         |
| 25 |    |                                                                                                                                                                                                                                                      |                                       | Database - CINAHL                        |         |
| 26 |    |                                                                                                                                                                                                                                                      |                                       |                                          |         |
| 27 | S4 | TI water N3 birth OR TI ( waterbirth or water-birth ) OR TI birth* N3 tub OR TI birth* N3 pool* OR TI water N3 immersion OR AB water N3 birth OR AB ( waterbirth or water-birth ) OR AB birth* N3 tub OR AB birth* N3 pool* OR AB water N3 immersion | Expanders - Apply equivalent subjects | Interface - EBSCOhost Research Databases | 1,270   |
| 28 |    |                                                                                                                                                                                                                                                      |                                       |                                          |         |
| 29 |    |                                                                                                                                                                                                                                                      |                                       |                                          |         |
| 30 |    |                                                                                                                                                                                                                                                      |                                       |                                          |         |
| 31 |    |                                                                                                                                                                                                                                                      |                                       |                                          |         |
| 32 |    |                                                                                                                                                                                                                                                      |                                       |                                          |         |
| 33 |    |                                                                                                                                                                                                                                                      |                                       |                                          |         |
| 34 |    |                                                                                                                                                                                                                                                      |                                       |                                          |         |
| 35 |    |                                                                                                                                                                                                                                                      |                                       |                                          |         |
| 36 |    |                                                                                                                                                                                                                                                      |                                       |                                          |         |
| 37 |    |                                                                                                                                                                                                                                                      | Search modes - Boolean/Phrase         | Search Screen - Advanced Search          |         |
| 38 |    |                                                                                                                                                                                                                                                      |                                       |                                          |         |
| 39 |    |                                                                                                                                                                                                                                                      |                                       |                                          |         |
| 40 |    |                                                                                                                                                                                                                                                      |                                       |                                          |         |
| 41 |    |                                                                                                                                                                                                                                                      |                                       | Database - CINAHL                        |         |
| 42 | S3 | ((MH childbirth+ OR MH labor+ OR (S1 OR S2)) AND (S1 OR S2)) AND (S1 OR S2)                                                                                                                                                                          | Expanders - Apply equivalent subjects | Interface - EBSCOhost Research Databases | 263,754 |
| 43 |    |                                                                                                                                                                                                                                                      |                                       |                                          |         |
| 44 |    |                                                                                                                                                                                                                                                      |                                       |                                          |         |
| 45 |    |                                                                                                                                                                                                                                                      |                                       |                                          |         |
| 46 |    |                                                                                                                                                                                                                                                      |                                       |                                          |         |
| 47 |    |                                                                                                                                                                                                                                                      |                                       |                                          |         |
| 48 |    |                                                                                                                                                                                                                                                      |                                       |                                          |         |
| 49 |    |                                                                                                                                                                                                                                                      | Search modes - Boolean/Phrase         | Search Screen - Advanced Search          |         |
| 50 |    |                                                                                                                                                                                                                                                      |                                       |                                          |         |
| 51 |    |                                                                                                                                                                                                                                                      |                                       | Database - CINAHL                        |         |
| 52 | S2 | MH childbirth+ OR MH labor+                                                                                                                                                                                                                          | Expanders - Apply equivalent subjects | Interface - EBSCOhost Research Databases | 36,225  |
| 53 |    |                                                                                                                                                                                                                                                      |                                       |                                          |         |
| 54 |    |                                                                                                                                                                                                                                                      |                                       |                                          |         |
| 55 |    |                                                                                                                                                                                                                                                      | Search modes - Boolean/Phrase         | Search Screen - Advanced Search          |         |
| 56 |    |                                                                                                                                                                                                                                                      |                                       |                                          |         |
| 57 |    |                                                                                                                                                                                                                                                      |                                       |                                          |         |
| 58 |    |                                                                                                                                                                                                                                                      |                                       |                                          |         |
| 59 |    |                                                                                                                                                                                                                                                      |                                       |                                          |         |
| 60 |    |                                                                                                                                                                                                                                                      |                                       |                                          |         |

1  
2  
3  
4  
5  
6  
7  
8  
9  
10  
11  
12  
13  
14  
15  
16  
17  
18  
19  
20  
21  
22  
23  
24  
25  
26  
27  
28  
29  
30  
31  
32  
33  
34  
35  
36  
37  
38  
39  
40  
41  
42  
43  
44  
45  
46  
47  
48  
49  
50  
51  
52  
53  
54  
55  
56  
57  
58  
59  
60

S1 TI ( intrapartum or intra-partum or labor or laboring or labour or labouring or deliver\* or childbirth\* or birth\* or parturition ) OR AB ( intrapartum or intra-partum or labor or laboring or labour or labouring or deliver\* or childbirth\* or birth\* or parturition )

Expanders - Apply equivalent subjects  
Database - CINAHL  
Interface - EBSCOhost Research Databases  
253,388  
Search modes - Boolean/Phrase  
Search Screen - Advanced Search  
Database - CINAHL

Psychinfo Search

[Accessibility Information and Tips](#) Revised Date: 07/2015

[Print Search History](#)

Monday, March 09, 2020 9:59:32 AM

| #  | Query                                                                                                                                                                                                                                                                | Limiters/Expanders                    | Last Run Via                                                        | Results |
|----|----------------------------------------------------------------------------------------------------------------------------------------------------------------------------------------------------------------------------------------------------------------------|---------------------------------------|---------------------------------------------------------------------|---------|
| S5 | (TI water N3 birth OR TI ( waterbirth or water-birth ) OR TI birth* N3 tub OR TI birth* N3 pool OR TI water N3 immersion OR AB water N3 birth OR AB ( waterbirth or water-birth ) OR AB birth* N3 tub OR AB birth* N3 pool OR AB water N3 immersion) AND (S3 AND S4) | Expanders - Apply equivalent subjects | Interface - EBSCOhost Research Databases                            | 58      |
|    |                                                                                                                                                                                                                                                                      | Search modes - Boolean/Phrase         | Search Screen - Advanced Search                                     |         |
| S4 | TI water N3 birth OR TI ( waterbirth or water-birth ) OR TI birth* N3 tub OR TI birth* N3 pool OR TI water N3 immersion OR AB water N3 birth OR AB ( waterbirth or water-birth ) OR AB birth* N3 tub OR AB birth* N3 pool OR AB water N3 immersion                   | Expanders - Apply equivalent subjects | Database - APA PsycInfo<br>Interface - EBSCOhost Research Databases | 451     |
|    |                                                                                                                                                                                                                                                                      | Search modes - Boolean/Phrase         | Search Screen - Advanced Search                                     |         |

1  
2  
3  
4  
5  
6  
7  
8  
9  
10  
11  
12  
13  
14  
15  
16  
17  
18  
19  
20  
21  
22  
23  
24  
25  
26  
27  
28  
29  
30  
31  
32  
33  
34  
35  
36  
37  
38  
39  
40  
41  
42  
43  
44  
45  
46  
47  
48  
49  
50  
51  
52  
53  
54  
55  
56  
57  
58  
59  
60

|    |                                                                                                                                                                                                                                                                          |                                       |                                          |                         |         |
|----|--------------------------------------------------------------------------------------------------------------------------------------------------------------------------------------------------------------------------------------------------------------------------|---------------------------------------|------------------------------------------|-------------------------|---------|
|    |                                                                                                                                                                                                                                                                          |                                       |                                          | Database - APA PsycInfo |         |
| S3 | ((MM "Intrapartum Period") OR (MM "Birth" OR MM "Birth Weight" OR MM "Caesarean Birth" OR MM "Labor (Childbirth)" OR MM "Natural Childbirth" OR MM "Premature Birth")) OR (MM "Labor (Childbirth)" OR MM "Caesarean Birth" OR MM "Intrapartum Period")) OR (S1 OR S2)    | Expanders - Apply equivalent subjects | Interface - EBSCOhost Research Databases |                         | 190,277 |
|    |                                                                                                                                                                                                                                                                          | Search modes - Boolean/Phrase         | Search Screen - Advanced Search          |                         |         |
|    |                                                                                                                                                                                                                                                                          |                                       |                                          | Database - APA PsycInfo |         |
| S2 | ((MM "Intrapartum Period") OR (MM "Birth" OR MM "Birth Weight" OR MM "Caesarean Birth" OR MM "Labor (Childbirth)" OR MM "Natural Childbirth" OR MM "Premature Birth")) OR (MM "Labor (Childbirth)" OR MM "Caesarean Birth" OR MM "Intrapartum Period")                   | Expanders - Apply equivalent subjects | Interface - EBSCOhost Research Databases |                         | 12,875  |
|    |                                                                                                                                                                                                                                                                          | Search modes - Boolean/Phrase         | Search Screen - Advanced Search          |                         |         |
|    |                                                                                                                                                                                                                                                                          |                                       |                                          | Database - APA PsycInfo |         |
| S1 | TI ( intrapartum or intra-partum or labor or laboring or labour or labouring or deliver* or childbirth* or birth* or parturition ) OR AB ( intrapartum or intra-partum or labor or laboring or labour or labouring or deliver* or childbirth* or birth* or parturition ) | Expanders - Apply equivalent subjects | Interface - EBSCOhost Research Databases |                         | 187,669 |
|    |                                                                                                                                                                                                                                                                          | Search modes - Boolean/Phrase         | Search Screen - Advanced Search          |                         |         |
|    |                                                                                                                                                                                                                                                                          |                                       |                                          | Database - APA PsycInfo |         |

## Medline Search

[Accessibility Information and Tips](#) Revised Date: 07/2015

## Print Search History

Monday, March 09, 2020 11:32:22 AM

| #  | Query                                                                                                                                                                                                                                                            | Limiters/Expanders                       | Last Run Via                                                             | Results |
|----|------------------------------------------------------------------------------------------------------------------------------------------------------------------------------------------------------------------------------------------------------------------|------------------------------------------|--------------------------------------------------------------------------|---------|
| S5 | (TI Water N3 birth OR TI ( waterbirth or water-birth ) OR TI birth N3 tub OR TI birth N3 pool OR TI water N3 immersion OR AB Water N3 birth OR AB ( waterbirth or water-birth ) OR AB birth N3 tub OR AB birth N3 pool OR AB water N3 immersion) AND (S3 AND S4) | Expanders -<br>Apply equivalent subjects | Interface - EBSCOhost<br>Research Databases                              | 697     |
|    |                                                                                                                                                                                                                                                                  | Search modes -<br>Boolean/Phrase         | Search Screen - Advanced Search<br><br>Database - MEDLINE with Full Text |         |
| S4 | TI Water N3 birth OR TI ( waterbirth or water-birth ) OR TI birth N3 tub OR TI birth N3 pool OR TI water N3 immersion OR AB Water N3 birth OR AB ( waterbirth or water-birth ) OR AB birth N3 tub OR AB birth N3 pool OR AB water N3 immersion                   | Expanders -<br>Apply equivalent subjects | Interface - EBSCOhost<br>Research Databases                              | 5,881   |
|    |                                                                                                                                                                                                                                                                  | Search modes -<br>Boolean/Phrase         | Search Screen - Advanced Search<br><br>Database - MEDLINE with Full Text |         |
| S3 | (MH Parturition+ OR MH Labor, Obstetric+) OR (S1 OR S2)                                                                                                                                                                                                          | Expanders -<br>Apply equivalent subjects | Interface - EBSCOhost<br>Research Databases                              | 988,860 |
|    |                                                                                                                                                                                                                                                                  | Search modes -<br>Boolean/Phrase         | Search Screen - Advanced Search<br><br>Database - MEDLINE with Full Text |         |

|    |    |                                                                                                                                                                                                                                                                                               |                                             |                                             |         |
|----|----|-----------------------------------------------------------------------------------------------------------------------------------------------------------------------------------------------------------------------------------------------------------------------------------------------|---------------------------------------------|---------------------------------------------|---------|
| 1  |    |                                                                                                                                                                                                                                                                                               |                                             |                                             |         |
| 2  |    |                                                                                                                                                                                                                                                                                               |                                             |                                             |         |
| 3  | S2 | MH Parturition+ OR MH Labor,<br>Obstetric+                                                                                                                                                                                                                                                    | Expanders -<br>Apply equivalent<br>subjects | Interface - EBSCOhost<br>Research Databases | 60,125  |
| 4  |    |                                                                                                                                                                                                                                                                                               |                                             |                                             |         |
| 5  |    |                                                                                                                                                                                                                                                                                               |                                             |                                             |         |
| 6  |    |                                                                                                                                                                                                                                                                                               |                                             |                                             |         |
| 7  |    |                                                                                                                                                                                                                                                                                               |                                             |                                             |         |
| 8  |    |                                                                                                                                                                                                                                                                                               |                                             |                                             |         |
| 9  |    |                                                                                                                                                                                                                                                                                               | Search modes -<br>Boolean/Phrase            | Search Screen - Advanced Search             |         |
| 10 |    |                                                                                                                                                                                                                                                                                               |                                             |                                             |         |
| 11 |    |                                                                                                                                                                                                                                                                                               |                                             |                                             |         |
| 12 |    |                                                                                                                                                                                                                                                                                               |                                             |                                             |         |
| 13 |    |                                                                                                                                                                                                                                                                                               |                                             | Database - MEDLINE with Full Text           |         |
| 14 |    |                                                                                                                                                                                                                                                                                               |                                             |                                             |         |
| 15 | S1 | TI ( intrapartum or intra-partum or<br>labor or laboring or labour or<br>labouring or deliver* or childbirth* or<br>birth* or parturition ) OR AB (<br>intrapartum or intra-partum or labor<br>or laboring or labour or labouring or<br>deliver* or childbirth* or birth* or<br>parturition ) | Expanders -<br>Apply equivalent<br>subjects | Interface - EBSCOhost<br>Research Databases | 970,439 |
| 16 |    |                                                                                                                                                                                                                                                                                               |                                             |                                             |         |
| 17 |    |                                                                                                                                                                                                                                                                                               |                                             |                                             |         |
| 18 |    |                                                                                                                                                                                                                                                                                               |                                             |                                             |         |
| 19 |    |                                                                                                                                                                                                                                                                                               |                                             |                                             |         |
| 20 |    |                                                                                                                                                                                                                                                                                               |                                             |                                             |         |
| 21 |    |                                                                                                                                                                                                                                                                                               |                                             |                                             |         |
| 22 |    |                                                                                                                                                                                                                                                                                               |                                             |                                             |         |
| 23 |    |                                                                                                                                                                                                                                                                                               |                                             |                                             |         |
| 24 |    |                                                                                                                                                                                                                                                                                               | Search modes -<br>Boolean/Phrase            | Search Screen - Advanced Search             |         |
| 25 |    |                                                                                                                                                                                                                                                                                               |                                             |                                             |         |
| 26 |    |                                                                                                                                                                                                                                                                                               |                                             |                                             |         |
| 27 |    |                                                                                                                                                                                                                                                                                               |                                             |                                             |         |
| 28 |    |                                                                                                                                                                                                                                                                                               |                                             | Database - MEDLINE with Full Text           |         |
| 29 |    |                                                                                                                                                                                                                                                                                               |                                             |                                             |         |
| 30 |    |                                                                                                                                                                                                                                                                                               |                                             |                                             |         |
| 31 |    |                                                                                                                                                                                                                                                                                               |                                             |                                             |         |
| 32 |    |                                                                                                                                                                                                                                                                                               |                                             |                                             |         |
| 33 |    |                                                                                                                                                                                                                                                                                               |                                             |                                             |         |
| 34 |    |                                                                                                                                                                                                                                                                                               |                                             |                                             |         |

## Embase Search

| <a href="#">#</a> ▼ | Searches        | Results | Type     | Actions                                                 | Annot<br>ations |
|---------------------|-----------------|---------|----------|---------------------------------------------------------|-----------------|
| 7                   | 3 and 6         | 552     | Advanced | <a href="#">Display Results</a><br><a href="#">More</a> |                 |
| 6                   | 4 or 5          | 55859   | Advanced | <a href="#">Display Results</a><br><a href="#">More</a> |                 |
| 5                   | exp labor/      | 34388   | Advanced | <a href="#">Display Results</a><br><a href="#">More</a> |                 |
| 4                   | exp childbirth/ | 55859   | Advanced | <a href="#">Display Results</a>                         |                 |

|    |   |                                                                                                                                                                                                                                                                        |         |          |                                 |
|----|---|------------------------------------------------------------------------------------------------------------------------------------------------------------------------------------------------------------------------------------------------------------------------|---------|----------|---------------------------------|
| 1  |   |                                                                                                                                                                                                                                                                        |         |          | <a href="#">More</a>            |
| 2  |   |                                                                                                                                                                                                                                                                        |         |          |                                 |
| 3  |   |                                                                                                                                                                                                                                                                        |         |          |                                 |
| 4  |   |                                                                                                                                                                                                                                                                        |         |          |                                 |
| 5  | 3 | 1 and 2                                                                                                                                                                                                                                                                | 39342   | Advanced | <a href="#">Display Results</a> |
| 6  |   |                                                                                                                                                                                                                                                                        |         |          |                                 |
| 7  |   |                                                                                                                                                                                                                                                                        |         |          |                                 |
| 8  |   |                                                                                                                                                                                                                                                                        |         |          | <a href="#">More</a>            |
| 9  |   |                                                                                                                                                                                                                                                                        |         |          |                                 |
| 10 | 2 | (water or waterbirth or water birth or water immersion or hydrotherapy or birth* pool).ti. or (water or waterbirth or water birth or water immersion or hydrotherapy or birth* pool).ab.                                                                               | 883990  | Advanced | <a href="#">Display Results</a> |
| 11 |   |                                                                                                                                                                                                                                                                        |         |          |                                 |
| 12 |   |                                                                                                                                                                                                                                                                        |         |          |                                 |
| 13 |   |                                                                                                                                                                                                                                                                        |         |          |                                 |
| 14 |   |                                                                                                                                                                                                                                                                        |         |          |                                 |
| 15 |   |                                                                                                                                                                                                                                                                        |         |          |                                 |
| 16 |   |                                                                                                                                                                                                                                                                        |         |          |                                 |
| 17 |   |                                                                                                                                                                                                                                                                        |         |          |                                 |
| 18 | 1 | (intrapartum or intra-partum or labor or laboring or labour or labouring or deliver* or childbirth* or birth* or parturition).ti. or (intrapartum or intra-partum or labor or laboring or labour or labouring or deliver* or childbirth* or birth* or parturition).ab. | 1283598 | Advanced | <a href="#">Display Results</a> |
| 19 |   |                                                                                                                                                                                                                                                                        |         |          |                                 |
| 20 |   |                                                                                                                                                                                                                                                                        |         |          |                                 |
| 21 |   |                                                                                                                                                                                                                                                                        |         |          |                                 |
| 22 |   |                                                                                                                                                                                                                                                                        |         |          |                                 |
| 23 |   |                                                                                                                                                                                                                                                                        |         |          |                                 |
| 24 |   |                                                                                                                                                                                                                                                                        |         |          |                                 |
| 25 |   |                                                                                                                                                                                                                                                                        |         |          |                                 |
| 26 |   |                                                                                                                                                                                                                                                                        |         |          |                                 |

### Cochrane Central Search

#### Search

Name: water

Date Run: 3/9/2020 4:18:27 PM

Comment:

| ID | Search                                                                                                                                                                | Hits   |
|----|-----------------------------------------------------------------------------------------------------------------------------------------------------------------------|--------|
| #1 | intrapartum or intra-partum or labor or laboring or labour or labouring or deliver* or childbirth* or birth* or parturition                                           | 109154 |
| #2 | MeSH descriptor: [Labor, Obstetric] explode all trees                                                                                                                 | 2298   |
| #3 | MeSH descriptor: [Parturition] explode all trees                                                                                                                      | 408    |
| #4 | #1 or #2 or #3                                                                                                                                                        | 109322 |
| #5 | (water NEAR birth):ti,ab,kw OR (water NEAR immersion):ti,ab,kw OR (waterbirth* or water-birth*):ti,ab,kw OR (birth* NEAR tub):ti,ab,kw OR (birth* NEAR pool):ti,ab,kw | 788    |
| #6 | #4 AND #5                                                                                                                                                             | 87     |

### Results

| Database | Number of hits |
|----------|----------------|
| CINAHL   | 719            |
| pyshinfo | 58             |
| MEDLINE  | 697            |
| EMBASE   | 552            |



|    |                           |             |
|----|---------------------------|-------------|
| 1  |                           |             |
| 2  |                           |             |
| 3  | COCHRANE                  | 87          |
| 4  |                           | <b>2113</b> |
| 5  |                           |             |
| 6  |                           |             |
| 7  | Duplicates removed        | 446         |
| 8  |                           | 1667        |
| 9  |                           |             |
| 10 |                           |             |
| 11 | Screened                  |             |
| 12 | title/abstract            | 1667        |
| 13 | Excluded                  | 1561        |
| 14 | Included for full text    | <b>106</b>  |
| 15 |                           |             |
| 16 |                           |             |
| 17 | Full text EXCLUDED        | 49          |
| 18 | <b>Full text INCLUDED</b> | <b>57</b>   |
| 19 | BMC update                | 1           |
| 20 |                           | 58 INCLUDED |
| 21 |                           |             |
| 22 |                           |             |
| 23 |                           |             |
| 24 |                           |             |

#### *Excluded Reasons*

| Reasons for exclusions | Number                        |    |
|------------------------|-------------------------------|----|
| 28                     | Unable to obtain text         | 11 |
| 29                     | Wrong study outcomes          | 7  |
| 30                     | Wrong study design            | 6  |
| 31                     | Conference abstract           | 5  |
| 32                     | Discussion paper not research | 2  |
| 33                     | Reprinted publication         | 1  |
| 34                     | Unable to translate text      | 9  |
| 35                     | Duplicate                     | 4  |
| 36                     | Letter not research           | 2  |
| 37                     | Wrong publication type        | 1  |
| 38                     | Poster                        | 1  |
| 39                     |                               | 49 |
| 40                     |                               |    |
| 41                     |                               |    |
| 42                     |                               |    |
| 43                     |                               |    |
| 44                     |                               |    |
| 45                     |                               |    |
| 46                     |                               |    |
| 47                     |                               |    |
| 48                     |                               |    |
| 49                     |                               |    |
| 50                     |                               |    |
| 51                     |                               |    |
| 52                     |                               |    |
| 53                     |                               |    |
| 54                     |                               |    |
| 55                     |                               |    |
| 56                     |                               |    |
| 57                     |                               |    |
| 58                     |                               |    |
| 59                     |                               |    |
| 60                     |                               |    |

Supplement 2: Directed Acyclic Graphs to identify assumptions of covariates likely to cause heterogeneity in the outcomes.

DAG 1: Assumptions about variables associated with variation in mode of birth.



BMJ

1  
2  
3  
4  
5  
6  
7  
8  
9  
10  
11  
12  
13  
14  
15  
16  
17  
18  
19  
20  
21  
22  
23  
24  
25  
26  
27  
28  
29  
30  
31  
32  
33  
34  
35  
36  
37  
38  
39  
40  
41  
42  
43  
44  
45  
46  
47  
48  
49  
50  
51  
52  
53  
54  
55  
56  
57  
58  
59  
60

DAG 2: Assumptions about variables associated with variation in maternal satisfaction



only

DAG 3: Assumptions about variables associated with variation in perineal outcomes.



1  
2  
3  
4  
5  
6  
7  
8  
9  
10  
11  
12  
13  
14  
15  
16  
17  
18  
19  
20  
21  
22  
23  
24  
25  
26  
27  
28  
29  
30  
31  
32  
33  
34  
35  
36  
37  
38  
39  
40  
41  
42  
43  
44  
45  
46  
47  
48  
49  
50  
51  
52  
53  
54  
55  
56  
57  
58  
59  
60

DAG 4: Assumptions about variables associated with variation in maternal infection.



DAG 5: Assumptions about variables associated with variation in neonatal outcomes.

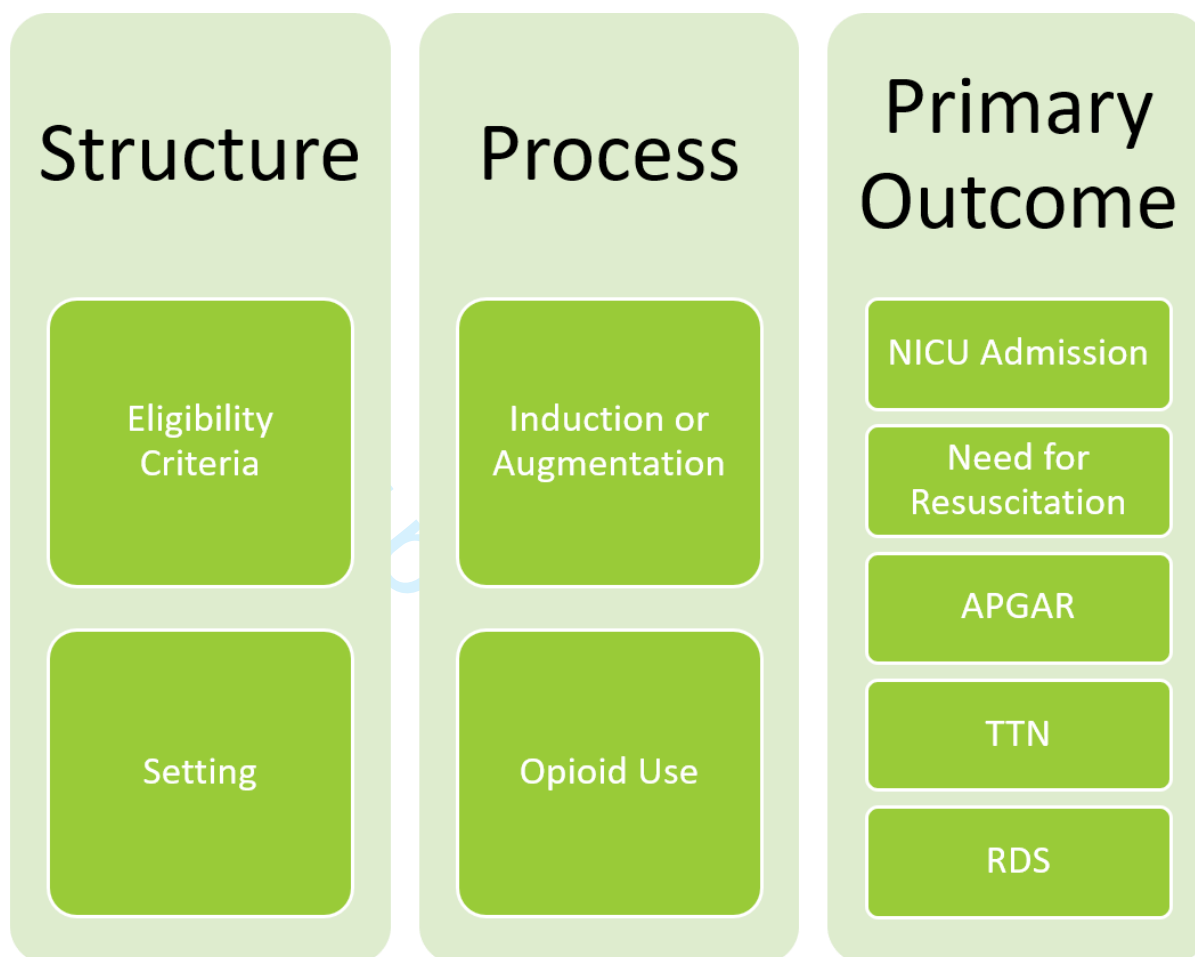

### Supplement 3: Certainty of Estimates using GRADE Criteria

#### Challenges of Applying GRADE to Water Immersion

When using the GRADE Criteria for water immersion, the certainty of the evidence for all outcomes begins at the level of “low” because most water immersion research is conducted as prospective observational studies. GRADE scores observational studies as less certain than randomized controlled trials. Unfortunately, randomized controlled trials of water immersion do not automatically reduce bias because of the nature of the intervention. Blinding of the care provider and participants is not possible and there is no control that can act as a placebo. This increases the risks for performance bias, detection bias, and reporting bias. Uneven attrition is expected as women randomized to water have many legitimate reasons for exiting the water, such as to use the bathroom or to facilitate fetal monitoring. In contrast, women randomized to standard care are unlikely to be asked to enter the water. This attrition bias causes challenges with intention to treat analyses, especially for outcomes that are only relevant if the birth occurs in water. A further challenge occurs in recruiting a sample willing to be randomized. Women who desire water immersion are less willing to be randomized. This selection bias produces a sample that does not represent the population that chooses water immersion for pain control. Given these limitations, randomized controlled trials reduce as much bias as a well-controlled prospective study.

The GRADE criteria assume a study is assessing the superiority of one intervention over another. However, most water immersion studies are interested in equivalency of outcomes. GRADE criteria allow upgrading for large magnitude of effect, but this is not possible when the purpose of a study is to demonstrate no increased risk of poor outcomes. GRADE criteria also allow upgrading for demonstration of a dose-effect. However there is no dose of water immersion; instead women enter and leave the pool at will and the length of immersion is determined by the length of labor. This leaves only one category of upgrading available to studies of water immersion – plausible confounding.

Understanding the limitations of applying the GRADE criteria to water immersion, we recommend readers interpret the results of the GRADE assessment with caution. A GRADE of “low” certainty for water immersion does not necessarily indicate a need for more research. We point to the example of postpartum hemorrhage. Thirteen studies reporting on 63,891 participants have been synthesized to demonstrate there is no increased risk of postpartum hemorrhage with water immersion. Grade assessment indicates the level of certainty is low, but fail-safe analysis indicated an additional 198 studies are needed to change the results to no difference. Fail-safe N is only calculated when the result favors water immersion or the standard care, so these comparisons are not available for outcomes reporting no difference.

#### Description of Assessment Criteria

1  
2  
3 Risk of Bias in individual studies are provided in the forest plots for each outcome. Grade criteria reduce certainty of an estimate if an  
4 outcome had serious limitations likely to result in a biased estimate, including accounting for the weight of each study to the final  
5 estimate.  
6

7  
8 Inconsistency of estimates between studies was expected as part of this review, as the purpose was to identify reasons for  
9 heterogeneity. Because the eligibility criteria for this study reflect intentionally seeking papers in different settings, inconsistency is  
10 not a criteria to assess the certainty of the estimate.  
11

12 Indirectness of the evidence reduces certainty when the population studied is not the population for the intended review. The study of  
13 water immersion is limited to women at low risk of birth complications, so this criterion does not affect the certainty of the evidence.  
14

15 Imprecision of the estimate for a systematic review is generally measuring the ability of the evidence to find a statistically significant  
16 result, however one purpose of studies of water immersion is to demonstrate no increased risk of harm. For the purposes of GRADE  
17 assessment, certainty was downgraded for imprecision when the sample available for meta-analysis had less than 2000 participants.  
18

19 Publication bias reduces certainty because it assumes studies with negative results are left unpublished. Prior studies have found  
20 publication bias that favors standard care over water immersion. This means the outcome is likely more favorable of water immersion  
21 than the estimate suggests and we can be more certain that water immersion is safe. To accommodate the standard Grade format,  
22 certainty of a result will be downgraded when the trim and fill test indicate the potential publication bias is enough to change the  
23 results.  
24  
25

26 Certainty of evidence is upgraded when the magnitude of effect is large, using standard risk ratios to define large and very large. For  
27 rare outcomes, such as those reported with water immersion, the OR becomes equivalent to the risk ratio, allowing this study to use  
28 the standard Grade Criteria for large effect ( $RR > 2$  or  $< 0.5$ ) and very large ( $RR > 5$  or  $< 0.2$ ) for most outcomes.  
29

30  
31 Certainty of evidence is upgraded when the evidence suggests a dose-effect. Water immersion does not have defined doses, instead  
32 women enter and exit the tub at will. In general, the length of immersion is determined by the length of labor.  
33

34 Certainty of evidence is upgraded when controlling for potential sources of confounding are likely to result in a more favorable  
35 outcome for water immersion. For this table, studies are upgraded if the result from meta-regression was more favorable than the main  
36 analysis.  
37  
38  
39  
40  
41  
42  
43  
44  
45  
46  
47



1  
2  
3  
4  
5  
6  
7  
8  
9  
10  
11  
12  
13  
14  
15  
16  
17  
18  
19  
20  
21  
22  
23  
24  
25  
26  
27  
28  
29  
30  
31  
32  
33  
34  
35  
36  
37  
38  
39  
40  
41  
42  
43  
44  
45  
46  
47

**Supplement 4 Table 1: GRADE Criteria for interventions and outcomes with water immersion for labor and delivery.**

| Outcome                    | Studies | Sample Size | Reduce Grade |               |              |             |                  | Increase Grade |             |                       | Final Grade | Importance | Fail-safe N |
|----------------------------|---------|-------------|--------------|---------------|--------------|-------------|------------------|----------------|-------------|-----------------------|-------------|------------|-------------|
|                            |         |             | Risk of Bias | Inconsistency | Indirectness | Imprecision | Publication Bias | Magnitude      | Dose-Effect | Plausible Confounding |             |            |             |
| Induction                  | 3       | 2,008       | -            | n.d.          | -            | -           | -                | -              | n.d.        | -                     | Low         | Limited    | -           |
| Amniotomy                  | 5       | 1,627       | -            | n.d.          | -            | ↓           | -                | -              | n.d.        | -                     | Low         | Limited    | -           |
| Augmentation               | 3       | 1,420       | -            | n.d.          | -            | ↓           | -                | ↑              | n.d.        | -                     | Low         | Important  | -           |
| Fetal Monitoring           | 0       | 0           | -            | n.d.          | -            | -           | -                | -              | n.d.        | -                     | NONE        | Limited    | -           |
| Opioid                     | 8       | 27,391      | -            | n.d.          | -            | -           | -                | ↑              | n.d.        | -                     | Moderate    | Important  | 972         |
| Epidural                   | 7       | 10,993      | -            | n.d.          | -            | -           | -                | ↑              | n.d.        | -                     | Moderate    | Important  | 100         |
| Pain                       | 8       | 1,200       | -            | n.d.          | -            | ↓           | -                | ↑              | n.d.        | -                     | Low         | Important  | 279         |
| Cesarean                   | 8       | 1,575       | -            | n.d.          | -            | ↓           | -                | -              | n.d.        | -                     | Very Low    | Critical   | -           |
| Shoulder Dystocia          | 7       | 53,367      | -            | n.d.          | -            | -           | -                | -              | n.d.        | -                     | Low         | Critical   | -           |
| Intact Perineum            | 14      | 59,070      | -            | n.d.          | -            | -           | -                | -              | n.d.        | ↑                     | Moderate    | Limited    | 358         |
| OASI                       | 14      | 93,690      | -            | n.d.          | -            | -           | -                | -              | n.d.        | -                     | Low         | Important  | -           |
| Episiotomy                 | 13      | 36,498      | -            | n.d.          | -            | -           | -                | ↑↑             | n.d.        | ↑                     | Very High   | Important  | 1525        |
| Third Stage Management     | 0       | 0           | -            | n.d.          | -            | -           | -                | -              | n.d.        | -                     | NONE        | Limited    | -           |
| Postpartum Hemorrhage      | 13      | 63,891      | -            | n.d.          | -            | -           | -                | -              | n.d.        | -                     | Low         | Critical   | 198         |
| Manual Removal of Placenta | 5       | 2,893       | -            | n.d.          | -            | -           | -                | -              | n.d.        | -                     | Low         | Critical   | -           |
| Maternal Infection         | 3       | 32,653      | -            | n.d.          | -            | -           | -                | -              | n.d.        | -                     | Low         | Important  | -           |
| Satisfaction               | 6       | 4,144       | -            | n.d.          | -            | -           | -                | -              | n.d.        | -                     | Low         | Important  | 133         |
| APGAR                      | 16      | 100,881     | -            | n.d.          | -            | -           | -                | -              | n.d.        | ↑                     | Moderate    | Important  | -           |
| Neonatal Resuscitation     | 5       | 51,028      | -            | n.d.          | -            | -           | -                | -              | n.d.        | -                     | Low         | Critical   | -           |
| Transient Tachypnea        | 2       | 1,473       | -            | n.d.          | -            | ↓           | -                | -              | n.d.        | -                     | Very Low    | Limited    | -           |

| Outcome                           | Studies | Sample Size | Reduce Grade |               |              |             |                  | Increase Grade |             |                       | Final Grade | Importance | Fail-safe N |
|-----------------------------------|---------|-------------|--------------|---------------|--------------|-------------|------------------|----------------|-------------|-----------------------|-------------|------------|-------------|
|                                   |         |             | Risk of Bias | Inconsistency | Indirectness | Imprecision | Publication Bias | Magnitude      | Dose-Effect | Plausible Confounding |             |            |             |
| Respiratory Distress              | 3       | 32,707      | -            | n.d.          | -            | -           | -                | -              | n.d.        | -                     | Low         | Critical   | -           |
| Neonatal Intensive Unit Admission | 0       | 0           | -            | n.d.          | -            | -           | -                | -              | n.d.        | -                     | NONE        | Critical   | -           |
| Neonatal Death                    | 3       | 66,544      | -            | n.d.          | -            | -           | -                | -              | n.d.        | -                     | Low         | Critical   | -           |
| Infection in Newborn Period       | 0       | 0           | -            | n.d.          | -            | -           | -                | -              | n.d.        | -                     | NONE        | Important  | -           |
| Cord Avulsion                     | 5       | 50,791      | -            | n.d.          | -            | -           | -                | -              | n.d.        | -                     | Low         | Limited    | 5           |
| Breastfeeding Initiation          | 2       | 692         | -            | n.d.          | -            | ↓           | -                | -              | n.d.        | -                     | Very Low    | Important  | -           |

**Supplement 4: Total studies excluded following searches and during full text review; systematic review and meta-analysis of interventions and outcomes with water birth.**

- Bodner, K., Bodner-Adler, B., Wierrani, F., Mayerhofer, K., Fousek, C., Niedermayr, A., & Grünberger, W. (2002). Effects of water birth on maternal and neonatal outcomes. *Wiener Klinische Wochenschrift*, 114(10), 391–395. [UNABLE TO OBTAIN TEXT]
- Burns EE, Boulton MG, Cluett E, Cornelius V, Smith LA (2012) Characteristics, Interventions, and Outcomes of Women Who Used a Birthing Pool: A Prospective Observational Study *Birth*, 39, (3), 192-202 <https://doi.org/10.1111/j.1523-536X.2012.00548.x> [WRONG STUDY DESIGN]
- Burns, E., Price, L., Carpenter, J., & Smith, L. (2020). Predictors of obstetric anal sphincter injury during waterbirth: a secondary analysis of a prospective observational study. *International urogynecology journal*, 31(3), 651–656. <https://doi.org/10.1007/s00192-019-04167-6> [WRONG STUDY DESIGN]
- Camargo, J., Varela, V., Ferreira, F. M., Pougy, L., Ochiai, A. M., Santos, M. E., & Grande, M. (2018). The Waterbirth Project: São Bernardo Hospital experience. *Women and birth : journal of the Australian College of Midwives*, 31(5), e325–e333. <https://doi.org/10.1016/j.wombi.2017.12.008> [WRONG STUDY DESIGN]
- Carlson N.S., Corwin E.J., & Lowe N.K. (2017). Labor Intervention and Outcomes in Women Who Are Nulliparous and Obese: Comparison of Nurse-Midwife to Obstetrician Intrapartum Care. *J. Midwifery Women's Health*, 62(1), 29–39. [WRONG STUDY OUTCOMES]
- Carpenter, L., & Weston, P. (2012). Neonatal respiratory consequences from water birth. *Journal of paediatrics and child health*, 48(5), 419–423. <https://doi.org/10.1111/j.1440-1754.2011.02241.x> [WRONG STUDY DESIGN]
- Cluett ER, Pickering RM, & Brooking JI. (2001). An investigation into the feasibility of comparing three management options (augmentation, conservative and water) for nulliparae with dystocia in the first stage of labour. *Midwifery*, 17(1), 35–43. [WRONG STUDY DESIGN]
- Combellick, J. L., Shin, H., Shin, D., Cai, Y., Hagan, H., Lacher, C., Lin, D. L., McCauley, K., Lynch, S. V., & Dominguez-Bello, M. G. (2018). Differences in the fecal microbiota of neonates born at home or in the hospital. *Scientific Reports*, 8(1), 15660–15660. [WRONG OUTCOME]
- Cortes, E., Basra, R., & Kelleher, C. J. (2011). Waterbirth and pelvic floor injury: a retrospective study and postal survey using ICIQ modular long form questionnaires. *European journal of obstetrics, gynecology, and reproductive biology*, 155(1), 27–30. <https://doi.org/10.1016/j.ejogrb.2010.11.012> [WRONG STUDY DESIGN]
- Czech, I., Fuchs, P., Fuchs, A., Lorek, M., Tobolska-Lorek, D., Drosdzol-Cop, A., & Sikora, J. (2018). Pharmacological and Non-Pharmacological Methods of Labour Pain Relief-Establishment of Effectiveness and Comparison. *International journal of environmental research and public health*, 15(12), 2792. <https://doi.org/10.3390/ijerph15122792> [WRONG STUDY DESIGN]
- Dahlen, H. G., Dowling, H., Tracy, M., Schmied, V., & Tracy, S. (2013). Maternal and perinatal outcomes amongst low risk women giving birth in water compared to six birth positions on land. A descriptive cross sectional study in a birth centre over 12 years. *Midwifery*, 29(7), 759–764. <https://doi.org/10.1016/j.midw.2012.07.002> [WRONG COMPARISON - waterbirth not a birth position]
- Damodaran S., Khatri P., Mahmood T.A., & Monaghan S.C. (2010). Waterbirths in Fife: A 6-year observational study. *J. Obstet. Gynaecol.*, 30(7), 759. [CONFERENCE ABSTRACT]
- de Freitas Brilhante, A., a, Moreira Vasconcelos, C. T., de Castro Damasceno, A. K., Martins Pereira, A. M., da Silva Coelho, T., & Mendes de Freitas, C. (2017). OBSTETRICAL NURSES EVALUATION OF WATER BIRTHS. *Journal of Nursing UFPE / Revista de Enfermagem UFPE*, 11(11), 4418–4423. [WRONG STUDY DESIGN]
- Demirel, G., Moraloglu, O., Celik, I. H., Erdeve, O., Mollamahmutoglu, L., Oguz, S. S., Uras, N., & Dilmen, U. (2013). The effects of water birth on neonatal outcomes: a five-year result of a referral tertiary centre. *European review for medical and pharmacological sciences*, 17(10), 1395–1398. [WRONG STUDY DESIGN]
- Eberhard, J., & Geissbühler, V. (2000). Influence of alternative birth methods on traditional birth management. *Fetal Diagnosis And Therapy*, 15(5), 283–290. [WRONG STUDY DESIGN]
- Eberhard J., Geissbuhler V., Chiffelle Ch., & Stein S. (2001). Alternative delivery methods and changes in obstetric practice. *Geburtshilfe Frauenheilkd.*, 61(10), 771–777. [UNABLE TO OBTAIN]
- Eckert K., Turnbull D., & MacLennan A. (2001). Warm water bathing did not reduce use of pharmacological analgesia during the first stage of labour. *Evid.-Based Med.*, 6(6), 177. [CONFERENCE ABSTRACT]
- Fehervary, P., Lauinger-Lörsch, E., Hof, H., Melchert, F., Bauer, L., & Zieger, W. (2004). Water birth: Microbiological colonisation of the newborn, neonatal and maternal infection rate in comparison to conventional bed deliveries. *Archives Of Gynecology And Obstetrics*, 270(1), 6–9. [WRONG OUTCOMES]

- Geissbühler, V., & Eberhard, J. (2000). Waterbirths: A comparative study. A prospective study on more than 2,000 waterbirths. *Fetal Diagnosis And Therapy*, 15(5), 291–300. [DUPLICATE]
- Geissbühler, V., & Eberhard, J. (2002). [Alternative obstetrics: Bed, chair or tub? Have alternative birthing methods become established?]. *Therapeutische Umschau. Revue Therapeutique*, 59(12), 689–695. [DISCUSSION NOT PRIMARY RESEARCH]
- Geissbühler, Verena, & Eberhard, J. (2003). Experience with water births: A prospective longitudinal study of 9 years with almost 4,000 water births]. *Gynakologisch-Geburtshilfliche Rundschau*, 43(1), 12–18. [REPRINTED PUBLICATION]
- Geissbuehler V. (2004). Alternative delivery positions: Bed, chair or water birth. *Geburtshilfe Frauenheilkd.*, 64(8), 856–857. [DISCUSSION NOT PRIMARY RESEARCH]
- Geissbuehler, V., Stein, S., & Eberhard, J. (2004). Waterbirths compared with landbirths: an observational study of nine years. *Journal of perinatal medicine*, 32(4), 308–314. <https://doi.org/10.1515/JPM.2004.057> [DUPLICATE]
- Gephart L.F., McDonald V., & Daucher J.A. (2013). A preliminary exploration of the affect of water birth on infantand maternal morbidity in the United States. *Female Pelvic Med. Reconstr. Surg.*, 19, S124. [CONFERENCE ABSTRACT]
- Ghasemi, M., Tara, F., & Ashraf, H. (2013). Maternal-fetal and neonatal complications of water-birth compared with conventional delivery. *Iranian Journal of Obstetrics, Gynecology and Infertility*, 16(70), 9–15. [UNABLE TO TRANSLATE TEXT]
- Ghasemi M., & Valiani M. (2014). Water Birth; method, benefits and indications in comparison with normal vaginal delivery in women parturient in Isfahan University of Medical Sciences' hospitals. *Iran. J. Reprod. Med.*, 12(6), 48–49. [DUPLICATE/UNABLE TO TRANSLATE]
- Grodzka, M., Makowska, P., Wielgoś, M., Przyboś, A., Chrostowska, J., & Marianowski, L. (2001). [Water birth in the parturients' estimation]. *Ginekologia Polska*, 72(12), 1025–1030. [UNABLE TO OBTAIN TEXT]
- Hesson A., Bailey J.M., Carver A.R., & Langen E.S. (2019). 673: Supporting Vaginal Birth: Effects of labor support measures on cesarean delivery rates. *Am. J. Obstet. Gynecol.*, 220(1), S445. [CONFERENCE ABSTRACT]
- Heydari S.T., Sarikhani Y., Asadi N., Kazemi M., Sadati A.K., Zarei S., Mansuri Z., Keshvarz F., Jabbari R., Mohtashami A., & Lankarani K.B. (2019). Selection of delivery method and its related factors in pregnant women of shiraz in 2016. *Shiraz E Med. J.*, 20(5), e81676. [WRONG STUDY DESIGN]
- Homer C, Eckert K, Turnbull D, & MacLennan A. (2002). Immersion in water during first stage of labor...Eckert K, Turnbull D, MacLennan A. Immersion in water in the first stage of labor: A randomized controlled trial. *BIRTH* 2001;28(2):84–93). *Birth: Issues in Perinatal Care*, 29(1), 76–77. [LETTER NOT RESEARCH]
- IRCT2015111725002N2. (2016). The impact of water birth on childbirth. <http://www.who.int/trialssearch/Trial2.aspx?TrialID=IRCT2015111725002N2>. <https://www.cochranelibrary.com/central/doi/10.1002/central/CN-01870447/full> [WRONG PUBLICATION TYPE]
- Kavosi, Z., Keshtkaran, A., Setoodehzadeh, F., Kasraeian, M., Khammarnia, M., & Eslahi, M. (2015). A Comparison of Mothers' Quality of Life after Normal Vaginal, Cesarean, and Water Birth Deliveries. *International Journal of Community Based Nursing & Midwifery*, 3(3), 198–204. [WRONG OUTCOMES]
- Kiani K., Shahpourian F., Sedighian H., & Hosseini F. (2009). Effect of water birth on labor pain during active phase of labor. *Int. J. Gynecol. Obstet.*, 107, S227. [CONFERENCE ABSTRACT]
- Kowalewska, M., Welfel, E., Kawczyński, P., & Pokrzywnicka, M. (2004). [Clinical condition of newborns from water birth at the Perinatology Clinic, Institute of Gynecology and Obstetrics of the Medical University in Łódź, in the years 1996–2001]. *Ginekologia Polska*, 75(4), 267–273. [UNABLE TO TRANSLATE TEXT]
- Lukasse, M., Rowe, R., Townend, J., Knight, M., & Hollowell, J. (2014). Immersion in water for pain relief and the risk of intrapartum transfer among low risk nulliparous women: secondary analysis of the Birthplace national prospective cohort study. *BMC pregnancy and childbirth*, 14, 60. <https://doi.org/10.1186/1471-2393-14-60> [WRONG STUDY DESIGN]
- Malarewicz, A., Wydrzynski, G., Szymkiewicz, J., & Adamczyk-Gruszka, O. (2005). [The influence of water immersion on the course of first stage of parturition in primiparous women]. *Medycyna Wieku Rozwojowego*, 9(4), 773–780. [UNABLE TO OBTAIN TEXT]
- Maude, R.M., Kim, M. (2020). Getting into the water: a prospective observational study of water immersion for labour and birth at a New Zealand District Health Board. *BMC Pregnancy Childbirth* 20, 312 <https://doi.org/10.1186/s12884-020-03007-6> [WRONG STUDY DESIGN]
- Milosevic S, Channon S, Hunter B, Nolan M, Hughes J, Barlow C, Milton R, Sanders J, (2019) Factors influencing the use of birth pools in the United Kingdom: Perspectives of women, midwives and medical staff, *Midwifery*, 79 102554 <https://reader.elsevier.com/reader/sd/pii/S0266613819302451?token=69C52CCB1FB267BEF11B83215A5D48E075E410436F27E4E3CD500CBB70ED1EE8F5F7Do427832E46EDC51A669E78A73C&originRegion=eu-west-1&originCreation=20210824135734> [WRONG OUTCOMES AND STUDY DESIGN]

- 1  
2 Moneta, J., Oknińska, A., Wielgoś, M., Przyboś, A., Chrostowska, J., & Marianowski, L. (2001). [The influence of water immersion on  
3 the course of labor]. *Ginekologia Polska*, 72(12), 1031–1036. [UNABLE TO TRANSLATE]
- 4 Montiel-Morales DP, Ferreira-Jaime F, Rendon-Macias ME (2016) Comparación del periodo de transición en recién nacidos obtenidos  
5 de parto en agua y parto en seco. Estudio de cohorts *Pediatría* 83 (5), 148-153 [WRONG OUTCOME]
- 6  
7 O'Sullivan M., Basude S., Bahl R., & Mohan A. (2017). Does giving birth in water increase rates of perineal trauma and OASI (Obstetric  
8 Anal Sphincter Injury)? *BJOG Int. J. Obstet. Gynaecol.*, 124, 69. [POSTER PRESENTATION]
- 9  
10 Overgaard, C., Fenger-Grøn, M., S, & all, J. (2012). Freestanding midwifery units versus obstetric units: Does the effect of place of birth  
11 differ with level of social disadvantage? *BMC Public Health*, 12, 478–478. [WRONG OUTCOMES]
- 12 Peacock P.J., Zengeya S.T., Cochrane L., & Sleath M. (2017). Neonatal outcomes following delivery in water: Evaluation of safety in a  
13 district general hospital. *Arch. Dis. Child.*, 102, A92. [DUPLICATE]
- 14  
15 Pellantová, S., Vebera, Z., & Půcek, P. (2003). [Water delivery—a 5-year retrospective study]. *Ceska Gynekologie*, 68(3), 175–179.  
16 [UNABLE TO TRANSLATE]
- 17  
18 Righetti, P. L., Pernici, A., ra, Casadei, D., Panizzo, F., Romagnolo, C., & Maggino, T. (2009). La nascita: Uno sguardo al vissuto  
19 materno Una ricerca empirica sull'impatto di tre modalità di parto sull'emozionalità e le rappresentazioni materne = The birth: A look  
20 at the mothers' psychological view An empirical research on the impact of three methods of birth on emotionality and maternal  
21 representations. *Giornale Di Psicologia*, 3(1), 83–105. [WRONG STUDY DESIGN]
- 22  
23 Schröcksnadel, H., Kunczicky, V., Meier, J., Brezinka, C., & Oberaigner, W. (2003). Gebären im Wasser. Erfahrungen einer  
24 Universitätsklinik und eines Bezirkskrankenhauses in Österreich [Water Birth: experience at a university clinic and a district hospital  
25 in Austria]. *Gynakologisch-geburtshilfliche Rundschau*, 43(1), 7–11. <https://doi.org/10.1159/000067170> [ENGLISH TRANSLATION  
26 INSUFFICIENT]
- 27  
28 Sidebottom, A. C., Vacquier, M., Simon, K., Fontaine, P., Dahlgren-Roemmich, D., Hyer, B., Jackson, J., Steinbring, S., Wunderlich,  
29 W., & Saul, L. (2019). Who Gives Birth in the Water? A Retrospective Cohort Study of Intended versus Completed  
30 Waterbirths. *Journal of midwifery & women's health*, 64(4), 403–409. <https://doi.org/10.1111/jmwh.12961> [WRONG STUDY DESIGN]
- 31  
32 Sindik N. (2006). Water birth. *Gynaecol. Perinatol. Suppl.*, 15(1), 33–36. [UNABLE TO TRANSLATE]
- 33  
34 Sipiński, A., Poreba, R., Cnota, W., & Poreba, A. (2000). [The analysis of 135 water births]. *Ginekologia Polska*, 71(4), 208–212. [UNABLE  
35 TO TRANSLATE]
- 36  
37 Stark M.A., Rudell B., & Haus G. (2008). Observing position and movements in hydrotherapy: A pilot study. *JOGNN J. Obstet. Gynecol.*  
38 *Neonatal Nurs.*, 37(1), 116–122. [WRONG OUTCOMES]
- 39  
40 Suto, M., Takehara, K., Misago, C., & Matsui, M. (2015). Prevalence of Perineal Lacerations in Women Giving Birth at Midwife-Led  
41 Birth Centers in Japan: A Retrospective Descriptive Study. *Journal of midwifery & women's health*, 60(4), 419–427.  
42 <https://doi.org/10.1111/jmwh.12324> [WRONG STUDY DESIGN]
- 43  
44 Thoeni A., Oberhuber A., & Moroder L. (2003). Giving birth and being born in the water. Experience after 1325 waterbirths. *Ital. J.*  
45 *Gynaecol. Obstet.*, 15(3), 113–120. [UNABLE TO OBTAIN]
- 46  
47 Thoni A., & Azzolini M.E. (2003). A review of 1136 waterbirths. *G. Ital. Ostet. Ginecol.*, 25(7), 305–311. [UNABLE TO OBTAIN]
- 48  
49 Thoni A., & Krauss P. (2000). Waterbirth: A review of 500 deliveries and a comparison with other delivery positions. *Ital. J. Gynaecol.*  
50 *Obstet.*, 12(3), 83–87. [UNABLE TO OBTAIN]
- 51  
52 Thöni, A., & Murari, S. (2001). [Birth in water. A comparative study after 555 births in water]. *Minerva Ginecologica*, 53(1), 29–34.  
53 [UNABLE TO OBTAIN]
- 54  
55 Thoni A., & Mussner K. (2002). Water birth—A review of 969 deliveries and a comparison with other delivery positions. *Geburtshilfe*  
56 *Frauenheilkd.*, 62(10), 977–981. [UNABLE TO TRANSLATE]
- 57  
58 Thoni A., & Mussner K. (2002). Water birth—A review of 969 deliveries and a comparison with other delivery positions. *Geburtshilfe*  
59 *Frauenheilkd.*, 62(10), 977–981. [DUPLICATE]
- 60  
61 Thoni A (2004) Giving birth and being born in water *Midwifery Today* Summer 44-45 [EXTENDED ABSTRACT]
- 62  
63 Thöni, A., Zech, N., & Moroder, L. (2005). [Water birth and neonatal infections. Experience with 1575 deliveries in water]. *Minerva*  
64 *Ginecologica*, 57(2), 199–206. [UNABLE TO OBTAIN]
- 65  
66 Thoni A., Zech N., Moroder L., Mussner K., & Ploner F. (2005). The risk of infection in water births. *Gynakol. Prax.*, 29(2), 233–241.  
67 [UNABLE TO OBTAIN]

- 1 Thoni A., Murari S., & Zech N. (2006). Giving birth and being born in the water. Report following 1850 underwater births. *Ital. J. Gynaecol. Obstet.*, 18(1), 11–17. [UNABLE TO OBTAIN]
- 2
- 3 Thoni, A., Zech, N., Moroder, L., & Ploner, F. (2007). Die Kontamination des Wassers und die Infektionsrate bei der Wassergeburt [Water contamination and infection rate after water births]. *Gynakologisch-geburtshilfliche Rundschau*, 47(1), 33–38. <https://doi.org/10.1159/000098123> [WRONG STUDY DESIGN]
- 5
- 6 Thöni, A., Mussner, K., & Ploner, F. (2010). [Water birthing: Retrospective review of 2625 water births. Contamination of birth pool water and risk of microbial cross-infection]. *Minerva Ginecologica*, 62(3), 203–211. [UNABLE TO TRANSLATE]
- 8
- 9 Vanderlaan J. (2017). Retrospective Cohort Study of Hydrotherapy in Labor. *Journal of obstetric, gynecologic, and neonatal nursing : JOGNN*, 46(3), 403–410. <https://doi.org/10.1016/j.jogn.2016.11.018> [WRONG STUDY DESIGN]
- 11
- 12 Vanderlaan, J., Hall, P. J., & Lewitt, M. (2018). Neonatal outcomes with water birth: A systematic review and meta-analysis. *Midwifery*, 59, 27–38. <https://doi.org/10.1016/j.midw.2017.12.023> [WRONG STUDY DESIGN]
- 13
- 14 Zaidi J, Zaidi F, Bradshaw H, Cluett ER, Getliffe K, Pickering RM, Saunders NJS, Robins JB, & Smith R. (2004). Labouring in water...Cluett ER, Pickering RM, Getliffe K, Saunders NJ. Randomised controlled trial of labouring in water compared with standard of augmentation for management of dystocia in first stage of labour. *BMJ* 2004;328:314. (7 February.). *BMJ: British Medical Journal (International Edition)*, 328(7442), 767–768. [LETTER NOT RESEARCH]
- 16
- 17
- 18
- 19 Zanetti-Dällenbach, R. A., Holzgreve, W., & Hösli, I. (2007). Neonatal group B streptococcus colonization in water births. *International Journal Of Gynaecology And Obstetrics: The Official Organ Of The International Federation Of Gynaecology And Obstetrics*, 98(1), 54–55. [WRONG OUTCOMES]
- 21
- 22
- 23 Zanetti-Dallenbach R., Lapaire O., Holzgreve W., & Hosli I. (2007). Neonatal colonization-rate with group B streptococcus is lower in neonates born underwater than after conventional vaginal delivery. *Geburtshilfe Frauenheilkd.*, 67(10), 1114–1119. [WRONG STUDY OUTCOMES]
- 24
- 25
- 26 Zanetti-Dällenbach, R., Lapaire, O., Maertens, A., Frei, R., Holzgreve, W., & Hösli, I. (2006). Water birth: Is the water an additional reservoir for group B streptococcus? *Archives Of Gynecology And Obstetrics*, 273(4), 236–238. [WRONG STUDY DESIGN]
- 27
- 28
- 29 Zhao, Y., Xiao, M., Tang, F., Tang, W., Yin, H., Sun, G. Q., Lin, Y., Zhou, Y., Luo, Y., Li, L. M., & Tan, Z. H. (2017). The effect of water immersion delivery on the strength of pelvic floor muscle and pelvic floor disorders during postpartum period: An experimental study. *Medicine*, 96(41), e8124. <https://doi.org/10.1097/MD.0000000000008124> [WRONG OUTCOMES]
- 31
- 32
- 33
- 34
- 35
- 36
- 37
- 38
- 39
- 40
- 41
- 42
- 43
- 44
- 45
- 46
- 47
- 48
- 49
- 50
- 51
- 52
- 53
- 54
- 55
- 56
- 57
- 58
- 59
- 60



## PRISMA 2020 Checklist

| Section and Topic             | Item # | Checklist item                                                                                                                                                                                                                                                                                       | Location where item is reported |
|-------------------------------|--------|------------------------------------------------------------------------------------------------------------------------------------------------------------------------------------------------------------------------------------------------------------------------------------------------------|---------------------------------|
| <b>TITLE</b>                  |        |                                                                                                                                                                                                                                                                                                      |                                 |
| Title                         | 1      | Identify the report as a systematic review.                                                                                                                                                                                                                                                          | Title P.1                       |
| <b>ABSTRACT</b>               |        |                                                                                                                                                                                                                                                                                                      |                                 |
| Abstract                      | 2      | See the PRISMA 2020 for Abstracts checklist.                                                                                                                                                                                                                                                         | p1                              |
| <b>INTRODUCTION</b>           |        |                                                                                                                                                                                                                                                                                                      |                                 |
| Rationale                     | 3      | Describe the rationale for the review in the context of existing knowledge.                                                                                                                                                                                                                          | p6                              |
| Objectives                    | 4      | Provide an explicit statement of the objective(s) or question(s) the review addresses.                                                                                                                                                                                                               | p7                              |
| <b>METHODS</b>                |        |                                                                                                                                                                                                                                                                                                      |                                 |
| Eligibility criteria          | 5      | Specify the inclusion and exclusion criteria for the review and how studies were grouped for the syntheses.                                                                                                                                                                                          | p7-8                            |
| Information sources           | 6      | Specify all databases, registers, websites, organisations, reference lists and other sources searched or consulted to identify studies. Specify the date when each source was last searched or consulted.                                                                                            | p8                              |
| Search strategy               | 7      | Present the full search strategies for all databases, registers and websites, including any filters and limits used.                                                                                                                                                                                 | p8, Sup 1                       |
| Selection process             | 8      | Specify the methods used to decide whether a study met the inclusion criteria of the review, including how many reviewers screened each record and each report retrieved, whether they worked independently, and if applicable, details of automation tools used in the process.                     | p9                              |
| Data collection process       | 9      | Specify the methods used to collect data from reports, including how many reviewers collected data from each report, whether they worked independently, any processes for obtaining or confirming data from study investigators, and if applicable, details of automation tools used in the process. | p9                              |
| Data items                    | 10a    | List and define all outcomes for which data were sought. Specify whether all results that were compatible with each outcome domain in each study were sought (e.g. for all measures, time points, analyses), and if not, the methods used to decide which results to collect.                        | P9                              |
|                               | 10b    | List and define all other variables for which data were sought (e.g. participant and intervention characteristics, funding sources). Describe any assumptions made about any missing or unclear information.                                                                                         | P9                              |
| Study risk of bias assessment | 11     | Specify the methods used to assess risk of bias in the included studies, including details of the tool(s) used, how many reviewers assessed each study and whether they worked independently, and if applicable, details of automation tools used in the process.                                    | p9, 10                          |
| Effect measures               | 12     | Specify for each outcome the effect measure(s) (e.g. risk ratio, mean difference) used in the synthesis or presentation of results.                                                                                                                                                                  | P10                             |
| Synthesis methods             | 13a    | Describe the processes used to decide which studies were eligible for each synthesis (e.g. tabulating the study intervention characteristics and comparing against the planned groups for each synthesis (item #5)).                                                                                 | p10                             |
|                               | 13b    | Describe any methods required to prepare the data for presentation or synthesis, such as handling of missing summary statistics, or data conversions.                                                                                                                                                | P10<br>Tables 2-3               |
|                               | 13c    | Describe any methods used to tabulate or visually display results of individual studies and syntheses.                                                                                                                                                                                               | P10                             |
|                               | 13d    | Describe any methods used to synthesize results and provide a rationale for the choice(s). If meta-analysis was performed, describe the model(s), method(s) to identify the presence and extent of statistical heterogeneity, and software package(s) used.                                          | P10                             |
|                               | 13e    | Describe any methods used to explore possible causes of heterogeneity among study results (e.g. subgroup analysis, meta-regression).                                                                                                                                                                 | P10                             |
|                               | 13f    | Describe any sensitivity analyses conducted to assess robustness of the synthesized results.                                                                                                                                                                                                         | P10-11                          |
| Reporting bias assessment     | 14     | Describe any methods used to assess risk of bias due to missing results in a synthesis (arising from reporting biases).                                                                                                                                                                              | P10                             |
| Certainty                     | 15     | Describe any methods used to assess certainty (or confidence) in the body of evidence for an outcome.                                                                                                                                                                                                | p11                             |

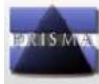

# PRISMA 2020 Checklist

| Section and Topic             | Item # | Checklist item                                                                                                                                                                                                                                                                       | Location where item is reported |
|-------------------------------|--------|--------------------------------------------------------------------------------------------------------------------------------------------------------------------------------------------------------------------------------------------------------------------------------------|---------------------------------|
| assessment                    |        |                                                                                                                                                                                                                                                                                      |                                 |
| <b>RESULTS</b>                |        |                                                                                                                                                                                                                                                                                      |                                 |
| Study selection               | 16a    | Describe the results of the search and selection process, from the number of records identified in the search to the number of studies included in the review, ideally using a flow diagram.                                                                                         | P11; figure 1                   |
|                               | 16b    | Cite studies that might appear to meet the inclusion criteria, but which were excluded, and explain why they were excluded.                                                                                                                                                          | Supplement 3                    |
| Study characteristics         | 17     | Cite each included study and present its characteristics.                                                                                                                                                                                                                            | Table 1,2,3                     |
| Risk of bias in studies       | 18     | Present assessments of risk of bias for each included study.                                                                                                                                                                                                                         | Figures 3-24                    |
| Results of individual studies | 19     | For all outcomes, present, for each study: (a) summary statistics for each group (where appropriate) and (b) an effect estimate and its precision (e.g. confidence/credible interval), ideally using structured tables or plots.                                                     | Figures 3-24                    |
| Results of syntheses          | 20a    | For each synthesis, briefly summarise the characteristics and risk of bias among contributing studies.                                                                                                                                                                               | P24-36; Figures 3-24            |
|                               | 20b    | Present results of all statistical syntheses conducted. If meta-analysis was done, present for each the summary estimate and its precision (e.g. confidence/credible interval) and measures of statistical heterogeneity. If comparing groups, describe the direction of the effect. | P24-36; Figures 3-24            |
|                               | 20c    | Present results of all investigations of possible causes of heterogeneity among study results.                                                                                                                                                                                       | P24-36; Figures 3-24            |
|                               | 20d    | Present results of all sensitivity analyses conducted to assess the robustness of the synthesized results.                                                                                                                                                                           | P24-36; Table 4                 |
| Reporting biases              | 21     | Present assessments of risk of bias due to missing results (arising from reporting biases) for each synthesis assessed.                                                                                                                                                              | P24-36; Table 5                 |
| Certainty of evidence         | 22     | Present assessments of certainty (or confidence) in the body of evidence for each outcome assessed.                                                                                                                                                                                  | P 38; Supplement 4              |
| <b>DISCUSSION</b>             |        |                                                                                                                                                                                                                                                                                      |                                 |
| Discussion                    | 23a    | Provide a general interpretation of the results in the context of other evidence.                                                                                                                                                                                                    | P39                             |
|                               | 23b    | Discuss any limitations of the evidence included in the review.                                                                                                                                                                                                                      | P41-42                          |
|                               | 23c    | Discuss any limitations of the review processes used.                                                                                                                                                                                                                                | P41-42                          |
|                               | 23d    | Discuss implications of the results for practice, policy, and future research.                                                                                                                                                                                                       | P42                             |
| <b>OTHER INFORMATION</b>      |        |                                                                                                                                                                                                                                                                                      |                                 |
| Registration and protocol     | 24a    | Provide registration information for the review, including register name and registration number, or state that the review was not registered.                                                                                                                                       | P7                              |
|                               | 24b    | Indicate where the review protocol can be accessed, or state that a protocol was not prepared.                                                                                                                                                                                       | P4                              |
|                               | 24c    | Describe and explain any amendments to information provided at registration or in the protocol.                                                                                                                                                                                      | P4                              |



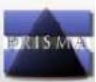

# PRISMA 2020 Checklist

1  
2  
3  
4  
5  
6  
7  
8  
9  
10  
11  
12  
13  
14  
15  
16  
17  
18  
19  
20  
21  
22  
23  
24  
25  
26  
27  
28  
29  
30  
31  
32  
33  
34  
35  
36  
37  
38  
39  
40  
41  
42  
43  
44  
45  
46  
47

| Section and Topic                              | Item # | Checklist item                                                                                                                                                                                                                             | Location where item is reported |
|------------------------------------------------|--------|--------------------------------------------------------------------------------------------------------------------------------------------------------------------------------------------------------------------------------------------|---------------------------------|
| Support                                        | 25     | Describe sources of financial or non-financial support for the review, and the role of the funders or sponsors in the review.                                                                                                              | P4                              |
| Competing interests                            | 26     | Declare any competing interests of review authors.                                                                                                                                                                                         | P5                              |
| Availability of data, code and other materials | 27     | Report which of the following are publicly available and where they can be found: template data collection forms; data extracted from included studies; data used for all analyses; analytic code; any other materials used in the review. | NA                              |

From: Page MJ, McKenzie JE, Bossuyt PM, Boutron I, Hoffmann TC, Mulrow CD, et al. The PRISMA 2020 statement: an updated guideline for reporting systematic reviews. *BMJ* 2021;372:n71. doi: 10.1136/bmj.n71  
 For more information, visit: <http://www.prisma-statement.org/>

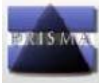

## PRISMA 2020 for Abstracts Checklist

| Section and Topic       | Item # | Checklist item                                                                                                                                                                                                                                                                                        | Reported (Yes/No) |
|-------------------------|--------|-------------------------------------------------------------------------------------------------------------------------------------------------------------------------------------------------------------------------------------------------------------------------------------------------------|-------------------|
| <b>TITLE</b>            |        |                                                                                                                                                                                                                                                                                                       |                   |
| Title                   | 1      | Identify the report as a systematic review.                                                                                                                                                                                                                                                           | YES               |
| <b>BACKGROUND</b>       |        |                                                                                                                                                                                                                                                                                                       |                   |
| Objectives              | 2      | Provide an explicit statement of the main objective(s) or question(s) the review addresses.                                                                                                                                                                                                           | YES               |
| <b>METHODS</b>          |        |                                                                                                                                                                                                                                                                                                       |                   |
| Eligibility criteria    | 3      | Specify the inclusion and exclusion criteria for the review.                                                                                                                                                                                                                                          | YES               |
| Information sources     | 4      | Specify the information sources (e.g. databases, registers) used to identify studies and the date when each was last searched.                                                                                                                                                                        | YES               |
| Risk of bias            | 5      | Specify the methods used to assess risk of bias in the included studies.                                                                                                                                                                                                                              | YES               |
| Synthesis of results    | 6      | Specify the methods used to present and synthesise results.                                                                                                                                                                                                                                           | YES               |
| <b>RESULTS</b>          |        |                                                                                                                                                                                                                                                                                                       |                   |
| Included studies        | 7      | Give the total number of included studies and participants and summarise relevant characteristics of studies.                                                                                                                                                                                         | YES               |
| Synthesis of results    | 8      | Present results for main outcomes, preferably indicating the number of included studies and participants for each. If meta-analysis was done, report the summary estimate and confidence/credible interval. If comparing groups, indicate the direction of the effect (i.e. which group is favoured). | YES               |
| <b>DISCUSSION</b>       |        |                                                                                                                                                                                                                                                                                                       |                   |
| Limitations of evidence | 9      | Provide a brief summary of the limitations of the evidence included in the review (e.g. study risk of bias, inconsistency and imprecision).                                                                                                                                                           | YES               |
| Interpretation          | 10     | Provide a general interpretation of the results and important implications.                                                                                                                                                                                                                           | YES               |
| <b>OTHER</b>            |        |                                                                                                                                                                                                                                                                                                       |                   |
| Funding                 | 11     | Specify the primary source of funding for the review.                                                                                                                                                                                                                                                 | YES               |
| Registration            | 12     | Provide the register name and registration number.                                                                                                                                                                                                                                                    | YES               |

From: Page MJ, McKenzie JE, Bossuyt PM, Boutron I, Hoffmann TC, Mulrow CD, et al. The PRISMA 2020 statement: an updated guideline for reporting systematic reviews. *BMJ* 2021;372:n71. doi: 10.1136/bmj.n71

For more information, visit: <http://www.prisma-statement.org/>
