# Supplementary material for: Systematic review and meta-analysis to examine intrapartum interventions, and maternal and neonatal outcomes following immersion in water during labour and waterbirth
Source: HighWire-hosted journal article supplement (doi:10.1136/bmjopen-2021-056517), 2022-06-01
Supplement: bmjopen-2021-056517supp001_data_supplement.pdf [file bmjopen-2021-056517supp001_data_supplement.pdf]

## Supplement 1 Search Information

## Pre-designed search terms

|                             |                                                                                                                                                                                                                                                                                                                                                                                                                                                                                                                                                                  |
|-----------------------------|------------------------------------------------------------------------------------------------------------------------------------------------------------------------------------------------------------------------------------------------------------------------------------------------------------------------------------------------------------------------------------------------------------------------------------------------------------------------------------------------------------------------------------------------------------------|
| Population                  | Primip* OR nullip* OR multip* OR term gestation* OR intra?partum OR birth* OR childbirth OR labo?r* OR parturition OR planned place birth* OR childbearing wom?n OR expectant wom?n OR expectant mother* OR labo?ring wom?n OR wom?n in labo?r                                                                                                                                                                                                                                                                                                                   |
| Intervention/Exposure water | Water OR water?birth OR water birth OR water immersion OR hydrotherapy OR birth* pool OR birth in water OR birth in pool                                                                                                                                                                                                                                                                                                                                                                                                                                         |
| Interventions during labour | Rupture membrane* OR spontaneous* OR artificial* OR augment*OR induc* OR epidural* OR oxytocin infusion OR opioid injection* OR transfer* OR transfer obstetric unit* OR electronic monitor* OR EFM OR cardiotocograph* OR auscultat* OR intermediate auscultate* OR physiological third stage OR expectant third stage OR physiological 3 <sup>rd</sup> stage OR expectant 3 <sup>rd</sup> stage OR managed third stage OR managed 3 <sup>rd</sup> stage OR active third stage OR active 3 <sup>rd</sup> stage OR placenta delivery OR delivery of the placenta |
| Outcomes Maternal           | spontaneous vaginal birth* OR spont* delivery OR perine* OR perineal OR trauma* OR anal sphincter OR OASIS OR obstetric anal sphincter injur* OR episiotom* OR postpartum h?emorrhage* OR PPH OR h?emorrhage* OR blood transfusion* OR blood product* OR red blood cell* OR infection* OR sepsis OR admission* OR readmission* OR pain OR numerical rating scales OR NRS OR visual analog scales OR VAS OR maternal health OR wom?n health                                                                                                                       |
| Outcomes Neonatal           | birthweight* OR gestation* OR Apgar score* OR resus* OR resuscitation OR ventilation* OR respiratory OR distress* OR transfer* OR transfer obstetric unit* OR paed* OR neonat* OR neonatal unit OR special care unit* OR antibiotic* OR admission* OR readmission* OR breastfeeding OR infection* OR sepsis OR antibiotic* OR new?born health OR neonat* health                                                                                                                                                                                                  |
| Time                        | Intrapartum OR intra?partum OR birth* OR child?birth OR labo?r* OR post?natal OR post?partum OR puerperium*                                                                                                                                                                                                                                                                                                                                                                                                                                                      |

### Pilot Search Terms

Population: Primip\* OR nullip\* OR multip\* OR parturient OR birth\* wom?n  
Exposure : Water OR waterbirth OR water birth OR water immersion OR immersion OR hydrotherapy OR birth\* pool OR tub  
Time: Intrapartum OR intra-partum OR birth\* OR childbirth OR labour\* OR labor\* OR parturition OR dilatation OR expulsion OR delivery of the placenta OR first stage OR second stage OR third stag

### Librarian Search Term Input

BNI (via Proquest)

S1 ab(Intrapartum OR intra-partum OR labor OR laboring OR labour OR labouring OR deliver\* OR childbirth\* OR birth\* OR parturition) OR ti(Intrapartum OR intra-partum OR labor OR laboring OR labour OR labouring OR deliver\* OR childbirth\* OR birth\* OR parturition) 98,180  
S2 MAINSUBJECT.EXACT("Childbirth & labor") 12,308  
S3 S1 OR S2 100,458  
S4 ab((Water N/3 birth) OR waterbirth OR water-birth OR (birth\* N/3 tub) OR (birth\*N/3 pool\*) OR (water N/3 immersion)) OR ti((Water N/3 birth) OR waterbirth OR water-birth OR (birth\* N/3 tub) OR (birth\* N/3 pool\*) OR (water N/3 immersion)) 501  
S5 S3 AND S4 424

CINAHL (via Ebscohost)

S1 TI ( Intrapartum OR intra-partum OR labor OR laboring OR labour OR labouring OR deliver\* OR childbirth\* OR birth\* OR parturition ) OR AB ( Intrapartum OR intra-partum OR labor OR laboring OR labour OR labouring OR deliver\* OR childbirth\* OR birth\* OR parturition ) 252,840  
S2 (MH "Childbirth+") OR (MH "Labor+") 36,176  
S3 S1 OR S2 263,207  
S4 TI ( (Water N3 birth) OR waterbirth OR water-birth OR (birth\* N3 tub) OR (birth\* N3 pool\*) OR (water N3 immersion) ) OR AB ( (Water N3 birth) OR waterbirth OR water-birth OR (birth\* N3 tub) OR (birth\* N3 pool\*) OR (water N3 immersion) ) 1,264  
S5 (MH "Water Birth") 600  
S6 S4 OR S5 1,572  
S7 S3 AND S6 824

PsycInfo (via Ebscohost)

S1 TI ( Intrapartum OR intra-partum OR labor OR laboring OR labour OR labouring OR deliver\* OR childbirth\* OR birth\* OR parturition ) OR AB ( Intrapartum OR intra-partum OR labor OR laboring OR labour OR labouring OR deliver\* OR childbirth\* OR birth\* OR parturition ) 187,428  
S2 DE "Intrapartum Period" OR DE "Birth" OR DE "Labor (Childbirth)" OR DE "Natural Childbirth" OR DE "Premature Birth" 14,070  
S3 S1 OR S2 190,598  
S4 TI ( (Water N3 birth) OR waterbirth OR water-birth OR (birth\* N3 tub) OR (birth\* N3 pool\*) OR (water N3 immersion) ) OR AB ( (Water N3 birth) OR waterbirth OR water-birth OR (birth\* N3 tub) OR (birth\* N3 pool\*) OR (water N3 immersion) ) 461  
S5 S3 AND S4 68

## Medline (via Ebscohost)

S1 TI ( Intrapartum OR intra-partum OR labor OR laboring OR labour OR labouring OR deliver\* OR childbirth\* OR birth\* OR parturition ) OR AB ( Intrapartum OR intra-partum OR labor OR laboring OR labour OR labouring OR deliver\* OR childbirth\* OR birth\* OR parturition ) 971,137

S2 (MH "Parturition+") OR (MH "Labor, Obstetric+") 60,186

S3 S1 OR S2 989,569

S4 TI ( (Water N3 birth) OR waterbirth OR water-birth OR (birth\* N3 tub) OR (birth\* N3 pool\*) OR (water N3 immersion) ) OR AB ( (Water N3 birth) OR waterbirth OR water-birth OR (birth\* N3 tub) OR (birth\* N3 pool\*) OR (water N3 immersion) ) 6,075

S5 S3 AND S4 892

## CINAHL Search

[Accessibility Information and Tips](#) Revised Date: 07/2015

[Print Search History](#)

Monday, March 09, 2020 9:20:23 AM

| #  | Query                                            | Limiters/Expanders                                                                    | Last Run Via                                                                                     | Results |
|----|--------------------------------------------------|---------------------------------------------------------------------------------------|--------------------------------------------------------------------------------------------------|---------|
| S8 | ((MH water birth) OR (S4 OR S5)) AND (S3 AND S6) | Limiters - Published Date: 20000101-20201231<br>Expanders - Apply equivalent subjects | Interface - EBSCOhost Research Databases<br>Search Screen - Advanced Search                      | 719     |
| S7 | ((MH water birth) OR (S4 OR S5)) AND (S3 AND S6) | Expanders - Apply equivalent subjects                                                 | Interface - EBSCOhost Research Databases<br>Search Screen - Advanced Search<br>Database - CINAHL | 826     |

|    |                                                                                                                                                                                                                                                      |                                       |                                          |         |
|----|------------------------------------------------------------------------------------------------------------------------------------------------------------------------------------------------------------------------------------------------------|---------------------------------------|------------------------------------------|---------|
| S6 | (MH water birth) OR (S4 OR S5)                                                                                                                                                                                                                       | Expanders - Apply equivalent subjects | Interface - EBSCOhost Research Databases | 1,577   |
|    |                                                                                                                                                                                                                                                      | Search modes - Boolean/Phrase         | Search Screen - Advanced Search          |         |
|    |                                                                                                                                                                                                                                                      |                                       | Database - CINAHL                        |         |
| S5 | MH water birth                                                                                                                                                                                                                                       | Expanders - Apply equivalent subjects | Interface - EBSCOhost Research Databases | 602     |
|    |                                                                                                                                                                                                                                                      | Search modes - Boolean/Phrase         | Search Screen - Advanced Search          |         |
|    |                                                                                                                                                                                                                                                      |                                       | Database - CINAHL                        |         |
| S4 | TI water N3 birth OR TI ( waterbirth or water-birth ) OR TI birth* N3 tub OR TI birth* N3 pool* OR TI water N3 immersion OR AB water N3 birth OR AB ( waterbirth or water-birth ) OR AB birth* N3 tub OR AB birth* N3 pool* OR AB water N3 immersion | Expanders - Apply equivalent subjects | Interface - EBSCOhost Research Databases | 1,270   |
|    |                                                                                                                                                                                                                                                      | Search modes - Boolean/Phrase         | Search Screen - Advanced Search          |         |
|    |                                                                                                                                                                                                                                                      |                                       | Database - CINAHL                        |         |
| S3 | ((((MH childbirth+ OR MH labor+) OR (S1 OR S2)) AND (S1 OR S2)) AND (S1 OR S2))                                                                                                                                                                      | Expanders - Apply equivalent subjects | Interface - EBSCOhost Research Databases | 263,754 |
|    |                                                                                                                                                                                                                                                      | Search modes - Boolean/Phrase         | Search Screen - Advanced Search          |         |
|    |                                                                                                                                                                                                                                                      |                                       | Database - CINAHL                        |         |
| S2 | MH childbirth+ OR MH labor+                                                                                                                                                                                                                          | Expanders - Apply equivalent subjects | Interface - EBSCOhost Research Databases | 36,225  |
|    |                                                                                                                                                                                                                                                      | Search modes - Boolean/Phrase         | Search Screen - Advanced Search          |         |

|    |                                                                                                                                                                                                                                                                          |                                       |                                                                  |         |
|----|--------------------------------------------------------------------------------------------------------------------------------------------------------------------------------------------------------------------------------------------------------------------------|---------------------------------------|------------------------------------------------------------------|---------|
| S1 | TI ( intrapartum or intra-partum or labor or laboring or labour or labouring or deliver* or childbirth* or birth* or parturition ) OR AB ( intrapartum or intra-partum or labor or laboring or labour or labouring or deliver* or childbirth* or birth* or parturition ) | Expanders - Apply equivalent subjects | Database - CINAHL<br>Interface - EBSCOhost<br>Research Databases | 253,388 |
|    |                                                                                                                                                                                                                                                                          | Search modes - Boolean/Phrase         | Search Screen - Advanced Search<br>Database - CINAHL             |         |

## Psychinfo Search

[Accessibility Information and Tips](#) Revised Date: 07/2015

[Print Search History](#)

Monday, March 09, 2020 9:59:32 AM

| #  | Query                                                                                                                                                                                                                                                                | Limiters/Expanders                    | Last Run Via                                                           | Results |
|----|----------------------------------------------------------------------------------------------------------------------------------------------------------------------------------------------------------------------------------------------------------------------|---------------------------------------|------------------------------------------------------------------------|---------|
| S5 | (TI water N3 birth OR TI ( waterbirth or water-birth ) OR TI birth* N3 tub OR TI birth* N3 pool OR TI water N3 immersion OR AB water N3 birth OR AB ( waterbirth or water-birth ) OR AB birth* N3 tub OR AB birth* N3 pool OR AB water N3 immersion) AND (S3 AND S4) | Expanders - Apply equivalent subjects | Interface - EBSCOhost<br>Research Databases                            | 58      |
|    |                                                                                                                                                                                                                                                                      | Search modes - Boolean/Phrase         | Search Screen - Advanced Search                                        |         |
| S4 | TI water N3 birth OR TI ( waterbirth or water-birth ) OR TI birth* N3 tub OR TI birth* N3 pool OR TI water N3 immersion OR AB water N3 birth OR AB ( waterbirth or water-birth ) OR AB birth* N3 tub OR AB birth* N3 pool OR AB water N3 immersion                   | Expanders - Apply equivalent subjects | Database - APA PsycInfo<br>Interface - EBSCOhost<br>Research Databases | 451     |
|    |                                                                                                                                                                                                                                                                      | Search modes - Boolean/Phrase         | Search Screen - Advanced Search                                        |         |

| Database - APA PsycInfo |                                                                                                                                                                                                                                                                           |                                       |                                          |         |
|-------------------------|---------------------------------------------------------------------------------------------------------------------------------------------------------------------------------------------------------------------------------------------------------------------------|---------------------------------------|------------------------------------------|---------|
| S3                      | ((((MM "Intrapartum Period") OR (MM "Birth" OR MM "Birth Weight" OR MM "Caesarean Birth" OR MM "Labor (Childbirth)" OR MM "Natural Childbirth" OR MM "Premature Birth"))) OR (MM "Labor (Childbirth)" OR MM "Caesarean Birth" OR MM "Intrapartum Period"))) OR (S1 OR S2) | Expanders - Apply equivalent subjects | Interface - EBSCOhost Research Databases | 190,277 |
|                         |                                                                                                                                                                                                                                                                           | Search modes - Boolean/Phrase         | Search Screen - Advanced Search          |         |
| Database - APA PsycInfo |                                                                                                                                                                                                                                                                           |                                       |                                          |         |
| S2                      | ((MM "Intrapartum Period") OR (MM "Birth" OR MM "Birth Weight" OR MM "Caesarean Birth" OR MM "Labor (Childbirth)" OR MM "Natural Childbirth" OR MM "Premature Birth"))) OR (MM "Labor (Childbirth)" OR MM "Caesarean Birth" OR MM "Intrapartum Period")                   | Expanders - Apply equivalent subjects | Interface - EBSCOhost Research Databases | 12,875  |
|                         |                                                                                                                                                                                                                                                                           | Search modes - Boolean/Phrase         | Search Screen - Advanced Search          |         |
| Database - APA PsycInfo |                                                                                                                                                                                                                                                                           |                                       |                                          |         |
| S1                      | TI ( intrapartum or intra-partum or labor or laboring or labour or labouring or deliver* or childbirth* or birth* or parturition ) OR AB ( intrapartum or intra-partum or labor or laboring or labour or labouring or deliver* or childbirth* or birth* or parturition )  | Expanders - Apply equivalent subjects | Interface - EBSCOhost Research Databases | 187,669 |
|                         |                                                                                                                                                                                                                                                                           | Search modes - Boolean/Phrase         | Search Screen - Advanced Search          |         |
| Database - APA PsycInfo |                                                                                                                                                                                                                                                                           |                                       |                                          |         |

## Medline Search

[Accessibility Information and Tips](#) Revised Date: 07/2015

## Print Search History

Monday, March 09, 2020 11:32:22 AM

| #  | Query                                                                                                                                                                                                                                                            | Limiters/Expanders                       | Last Run Via                                                             | Results |
|----|------------------------------------------------------------------------------------------------------------------------------------------------------------------------------------------------------------------------------------------------------------------|------------------------------------------|--------------------------------------------------------------------------|---------|
| S5 | (TI Water N3 birth OR TI ( waterbirth or water-birth ) OR TI birth N3 tub OR TI birth N3 pool OR TI water N3 immersion OR AB Water N3 birth OR AB ( waterbirth or water-birth ) OR AB birth N3 tub OR AB birth N3 pool OR AB water N3 immersion) AND (S3 AND S4) | Expanders -<br>Apply equivalent subjects | Interface - EBSCOhost<br>Research Databases                              | 697     |
|    |                                                                                                                                                                                                                                                                  | Search modes -<br>Boolean/Phrase         | Search Screen - Advanced Search<br><br>Database - MEDLINE with Full Text |         |
| S4 | TI Water N3 birth OR TI ( waterbirth or water-birth ) OR TI birth N3 tub OR TI birth N3 pool OR TI water N3 immersion OR AB Water N3 birth OR AB ( waterbirth or water-birth ) OR AB birth N3 tub OR AB birth N3 pool OR AB water N3 immersion                   | Expanders -<br>Apply equivalent subjects | Interface - EBSCOhost<br>Research Databases                              | 5,881   |
|    |                                                                                                                                                                                                                                                                  | Search modes -<br>Boolean/Phrase         | Search Screen - Advanced Search<br><br>Database - MEDLINE with Full Text |         |
| S3 | (MH Parturition+ OR MH Labor, Obstetric+) OR (S1 OR S2)                                                                                                                                                                                                          | Expanders -<br>Apply equivalent subjects | Interface - EBSCOhost<br>Research Databases                              | 988,860 |
|    |                                                                                                                                                                                                                                                                  | Search modes -<br>Boolean/Phrase         | Search Screen - Advanced Search<br><br>Database - MEDLINE with Full Text |         |

|    |                                                                                                                                                                                                                                                                          |                                          |                                             |         |
|----|--------------------------------------------------------------------------------------------------------------------------------------------------------------------------------------------------------------------------------------------------------------------------|------------------------------------------|---------------------------------------------|---------|
| S2 | MH Parturition+ OR MH Labor, Obstetric+                                                                                                                                                                                                                                  | Expanders -<br>Apply equivalent subjects | Interface - EBSCOhost<br>Research Databases | 60,125  |
|    |                                                                                                                                                                                                                                                                          | Search modes -<br>Boolean/Phrase         | Search Screen - Advanced Search             |         |
|    |                                                                                                                                                                                                                                                                          |                                          | Database - MEDLINE with Full Text           |         |
| S1 | TI ( intrapartum or intra-partum or labor or laboring or labour or labouring or deliver* or childbirth* or birth* or parturition ) OR AB ( intrapartum or intra-partum or labor or laboring or labour or labouring or deliver* or childbirth* or birth* or parturition ) | Expanders -<br>Apply equivalent subjects | Interface - EBSCOhost<br>Research Databases | 970,439 |
|    |                                                                                                                                                                                                                                                                          | Search modes -<br>Boolean/Phrase         | Search Screen - Advanced Search             |         |
|    |                                                                                                                                                                                                                                                                          |                                          | Database - MEDLINE with Full Text           |         |

## Embase Search

| # ▼ | Searches        | Results | Type     | Actions                                                 | Annot ations |
|-----|-----------------|---------|----------|---------------------------------------------------------|--------------|
| 7   | 3 and 6         | 552     | Advanced | <a href="#">Display Results</a><br><a href="#">More</a> |              |
| 6   | 4 or 5          | 55859   | Advanced | <a href="#">Display Results</a><br><a href="#">More</a> |              |
| 5   | exp labor/      | 34388   | Advanced | <a href="#">Display Results</a><br><a href="#">More</a> |              |
| 4   | exp childbirth/ | 55859   | Advanced | <a href="#">Display Results</a>                         |              |



|   |                                                                                                                                                                                                                                                                        |         |          |                                                         |
|---|------------------------------------------------------------------------------------------------------------------------------------------------------------------------------------------------------------------------------------------------------------------------|---------|----------|---------------------------------------------------------|
| 3 | 1 and 2                                                                                                                                                                                                                                                                | 39342   | Advanced | <a href="#">More</a><br><a href="#">Display Results</a> |
| 2 | (water or waterbirth or water birth or water immersion or hydrotherapy or birth* pool).ti. or (water or waterbirth or water birth or water immersion or hydrotherapy or birth* pool).ab.                                                                               | 883990  | Advanced | <a href="#">More</a><br><a href="#">Display Results</a> |
| 1 | (intrapartum or intra-partum or labor or laboring or labour or labouring or deliver* or childbirth* or birth* or parturition).ti. or (intrapartum or intra-partum or labor or laboring or labour or labouring or deliver* or childbirth* or birth* or parturition).ab. | 1283598 | Advanced | <a href="#">Display Results</a>                         |

*Cochrane Central Search*

## Search

Name: water

Date Run: 3/9/2020 4:18:27 PM

Comment:

| ID | Search                                                                                                                                                                                  | Hits   |
|----|-----------------------------------------------------------------------------------------------------------------------------------------------------------------------------------------|--------|
| #1 | intrapartum or intra-partum or labor or laboring or labour or labouring or deliver* or childbirth* or birth* or parturition                                                             | 109154 |
| #2 | MeSH descriptor: [Labor, Obstetric] explode all trees                                                                                                                                   | 2298   |
| #3 | MeSH descriptor: [Parturition] explode all trees                                                                                                                                        | 408    |
| #4 | #1 or #2 or #3<br>(water NEAR birth):ti,ab,kw OR (water NEAR immersion):ti,ab,kw OR (waterbirth* or water-birth*):ti,ab,kw OR (birth* NEAR tub):ti,ab,kw OR (birth* NEAR pool):ti,ab,kw | 109322 |
| #5 | #4 AND #5                                                                                                                                                                               | 788    |
| #6 |                                                                                                                                                                                         | 87     |

*Results*

| Database | Number of hits |
|----------|----------------|
| CINAHL   | 719            |
| pyshinfo | 58             |
| MEDLINE  | 697            |
| EMBASE   | 552            |

|                           |             |          |
|---------------------------|-------------|----------|
| COCHRANE                  | 87          |          |
|                           | <b>2113</b> |          |
| Duplicates removed        | 446         |          |
|                           | 1667        |          |
| Screened                  |             |          |
| title/abstract            | 1667        |          |
| Excluded                  | 1561        |          |
| Included for full text    | <b>106</b>  |          |
| Full text EXCLUDED        | 49          |          |
| <b>Full text INCLUDED</b> | <b>57</b>   |          |
| BMC update                | 1           |          |
|                           | 58          | INCLUDED |

#### *Excluded Reasons*

| <b>Reasons for exclusions</b> | <b>Number</b> |
|-------------------------------|---------------|
| Unable to obtain text         | 11            |
| Wrong study outcomes          | 7             |
| Wrong study design            | 6             |
| Conference abstract           | 5             |
| Discussion paper not research | 2             |
| Reprinted publication         | 1             |
| Unable to translate text      | 9             |
| Duplicate                     | 4             |
| Letter not research           | 2             |
| Wrong publication type        | 1             |
| Poster                        | 1             |
|                               | <b>49</b>     |
