# Supplementary material for: Systematic review and meta-analysis to examine intrapartum interventions, and maternal and neonatal outcomes following immersion in water during labour and waterbirth
Source: PubMed Central journal article supplement — BMJ Open. 2022 Jun 6;12(7):e056517. doi: 10.1136/bmjopen-2021-056517 (PMC9315919; doi:10.1136/bmjopen-2021-056517), 2022-06-06

Supplement 2: Directed Acyclic Graphs to identify assumptions of covariates likely to cause heterogeneity in the outcomes.

DAG 1: Assumptions about variables associated with variation in mode of birth.

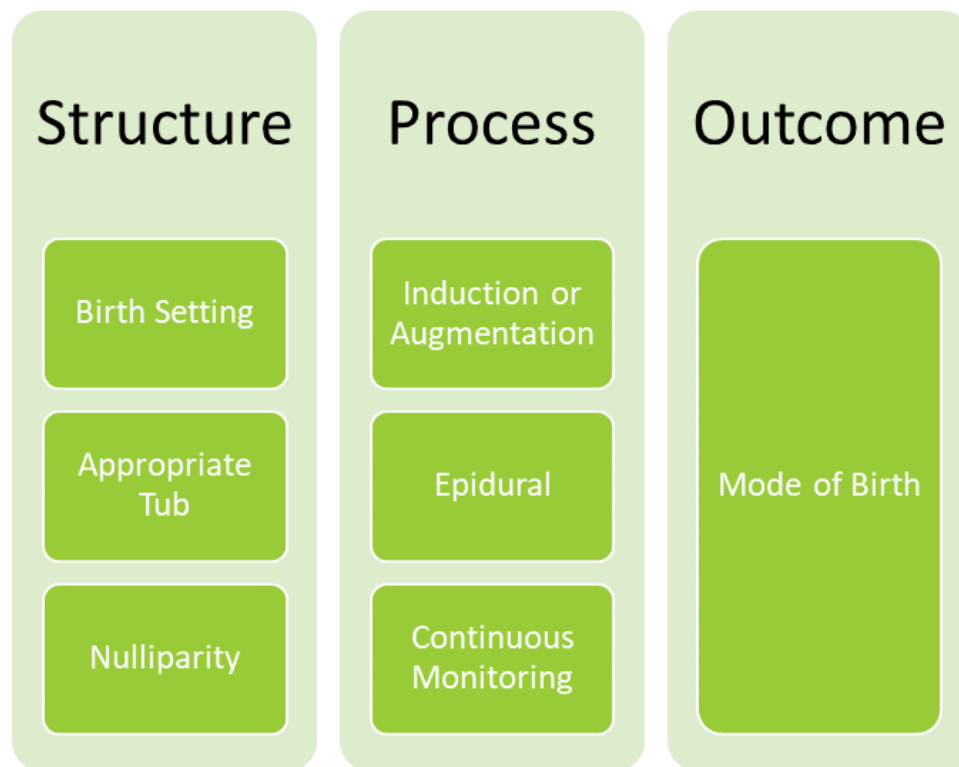

DAG 2: Assumptions about variables associated with variation in maternal satisfaction

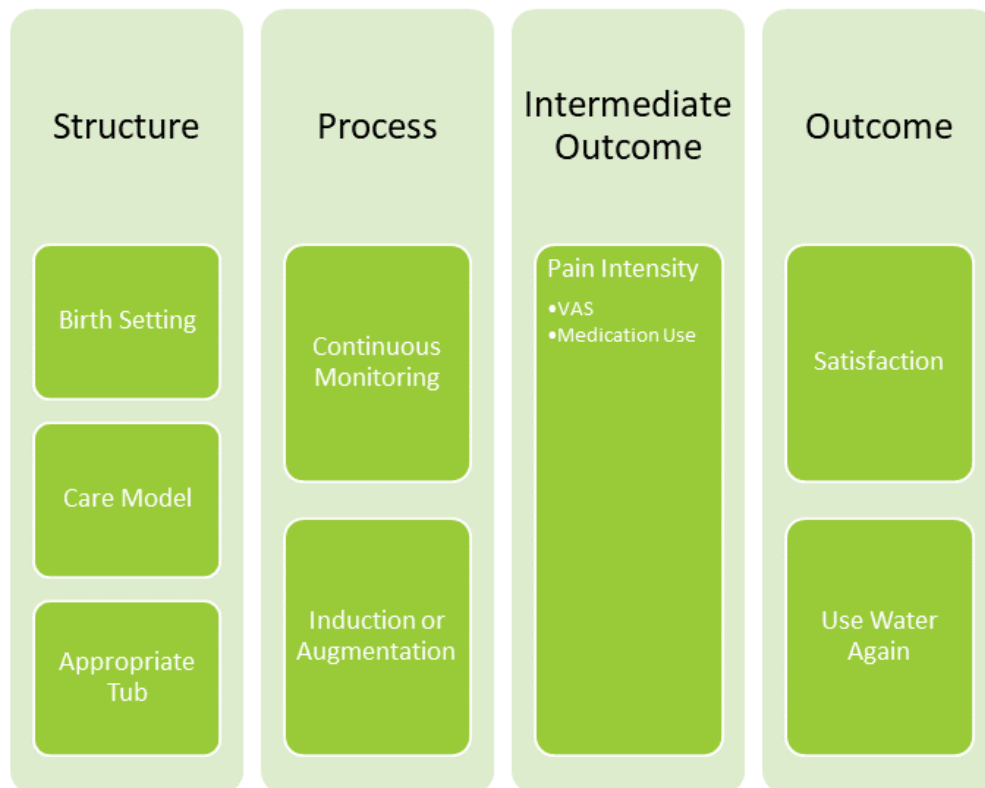

DAG 3: Assumptions about variables associated with variation in perineal outcomes.

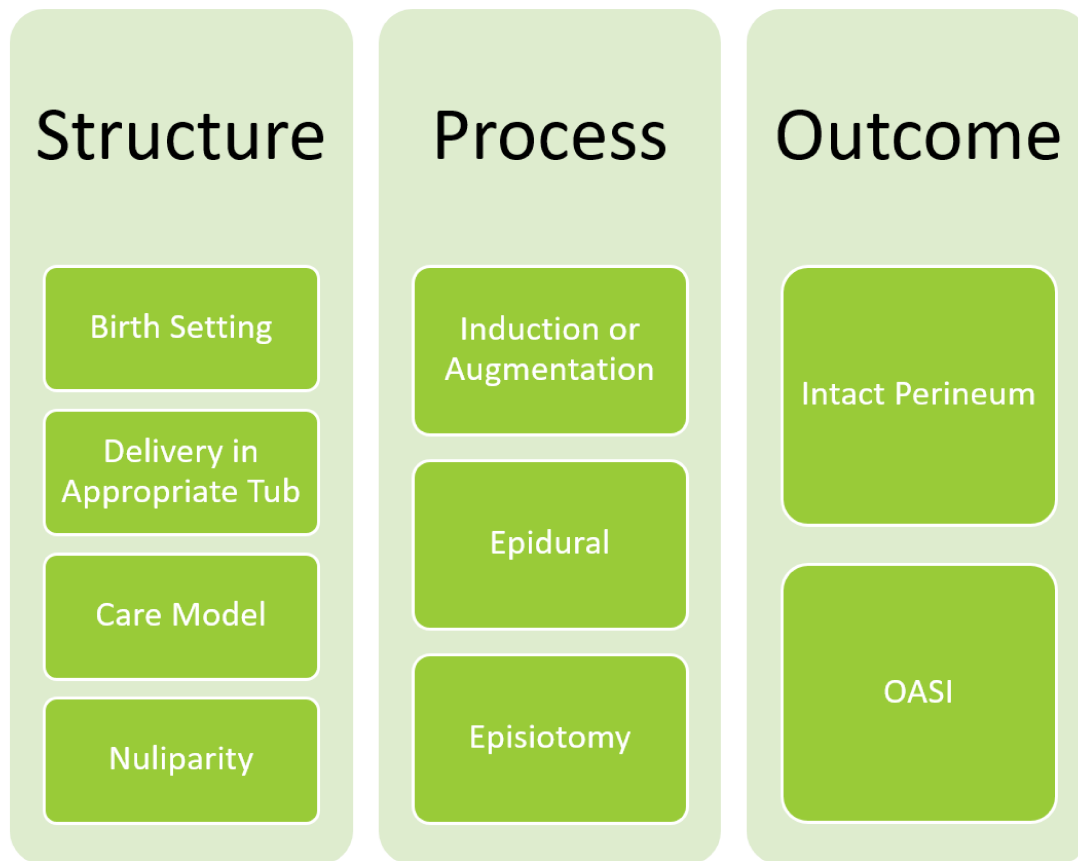

DAG 4: Assumptions about variables associated with variation in maternal infection.

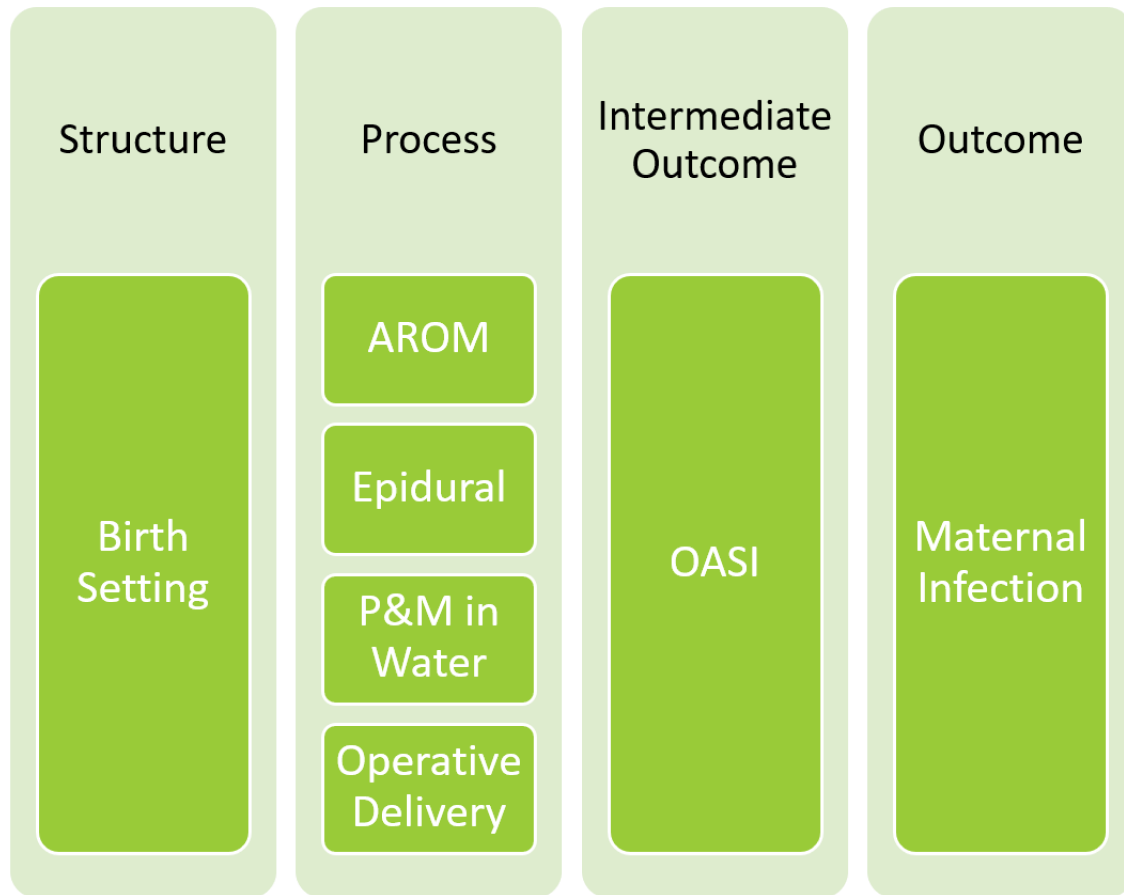

DAG 5: Assumptions about variables associated with variation in neonatal outcomes.

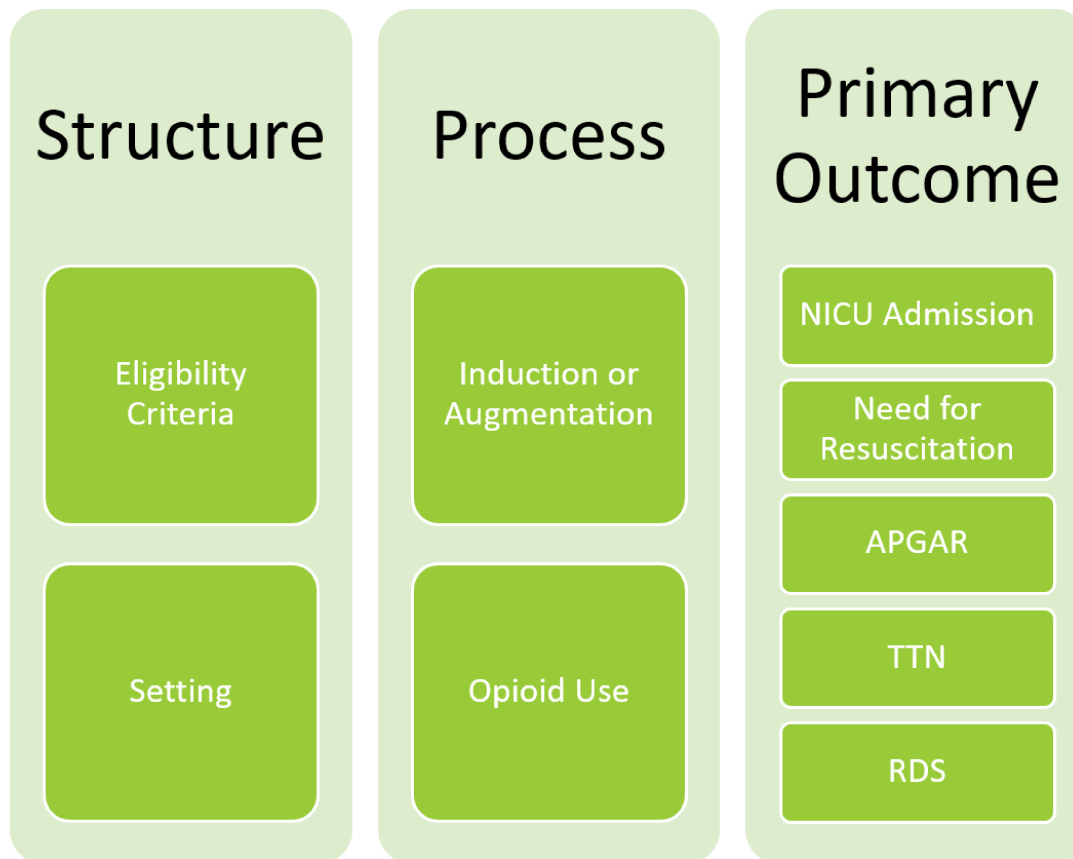

Supplement: bmjopen-2021-056517supp002.pdf [file bmjopen-2021-056517supp002.pdf]
