# Supplementary material for: Systematic review and meta-analysis to examine intrapartum interventions, and maternal and neonatal outcomes following immersion in water during labour and waterbirth
Source: HighWire-hosted journal article supplement (doi:10.1136/bmjopen-2021-056517), 2022-06-01
Supplement: bmjopen-2021-056517supp004_data_supplement.pdf [file bmjopen-2021-056517supp004_data_supplement.pdf]

**Supplement 4: Total studies excluded following searches and during full text review; systematic review and meta-analysis of interventions and outcomes with water birth.**

Bodner, K., Bodner-Adler, B., Wierrani, F., Mayerhofer, K., Fousek, C., Niedermayr, A., & Grünberger, W. (2002). Effects of water birth on maternal and neonatal outcomes. *Wiener Klinische Wochenschrift*, 114(10), 391–395. [UNABLE TO OBTAIN TEXT]

Burns EE, Boulton MG, Cluett E, Cornelius V, Smith LA (2012) Characteristics, Interventions, and Outcomes of Women Who Used a Birthing Pool: A Prospective Observational Study *Birth*, 39, (3), 192–202 <https://doi.org/10.1111/j.1523-536X.2012.00548.x> [WRONG STUDY DESIGN]

Burns, E., Price, L., Carpenter, J., & Smith, L. (2020). Predictors of obstetric anal sphincter injury during waterbirth: a secondary analysis of a prospective observational study. *International urogynecology journal*, 31(3), 651–656. <https://doi.org/10.1007/s00192-019-04167-6> [WRONG STUDY DESIGN]

Camargo, J., Varela, V., Ferreira, F. M., Pougy, L., Ochiai, A. M., Santos, M. E., & Grande, M. (2018). The Waterbirth Project: São Bernardo Hospital experience. *Women and birth : journal of the Australian College of Midwives*, 31(5), e325–e333. <https://doi.org/10.1016/j.wombi.2017.12.008> [WRONG STUDY DESIGN]

Carlson N.S., Corwin E.J., & Lowe N.K. (2017). Labor Intervention and Outcomes in Women Who Are Nulliparous and Obese: Comparison of Nurse-Midwife to Obstetrician Intrapartum Care. *J. Midwifery Women's Health*, 62(1), 29–39. [WRONG STUDY OUTCOMES]

Carpenter, L., & Weston, P. (2012). Neonatal respiratory consequences from water birth. *Journal of paediatrics and child health*, 48(5), 419–423. <https://doi.org/10.1111/j.1440-1754.2011.02241.x> [WRONG STUDY DESIGN]

Cluett ER, Pickering RM, & Brooking JI. (2001). An investigation into the feasibility of comparing three management options (augmentation, conservative and water) for nulliparae with dystocia in the first stage of labour. *Midwifery*, 17(1), 35–43. [WRONG STUDY DESIGN]

Combellick, J. L., Shin, H., Shin, D., Cai, Y., Hagan, H., Lacher, C., Lin, D. L., McCauley, K., Lynch, S. V., & Dominguez-Bello, M. G. (2018). Differences in the fecal microbiota of neonates born at home or in the hospital. *Scientific Reports*, 8(1), 15660–15660. [WRONG OUTCOME]

Cortes, E., Basra, R., & Kelleher, C. J. (2011). Waterbirth and pelvic floor injury: a retrospective study and postal survey using ICIQ modular long form questionnaires. *European journal of obstetrics, gynecology, and reproductive biology*, 155(1), 27–30. <https://doi.org/10.1016/j.ejogrb.2010.11.012> [WRONG STUDY DESIGN]

Czech, I., Fuchs, P., Fuchs, A., Lorek, M., Tobolska-Lorek, D., Drosdzol-Cop, A., & Sikora, J. (2018). Pharmacological and Non-Pharmacological Methods of Labour Pain Relief-Establishment of Effectiveness and Comparison. *International journal of environmental research and public health*, 15(12), 2792. <https://doi.org/10.3390/ijerph15122792> [WRONG STUDY DESIGN]

Dahlen, H. G., Dowling, H., Tracy, M., Schmied, V., & Tracy, S. (2013). Maternal and perinatal outcomes amongst low risk women giving birth in water compared to six birth positions on land. A descriptive cross sectional study in a birth centre over 12 years. *Midwifery*, 29(7), 759–764. <https://doi.org/10.1016/j.midw.2012.07.002> [WRONG COMPARISON - waterbirth not a birth position]

Damodaran S., Khatri P., Mahmood T.A., & Monaghan S.C. (2010). Waterbirths in Fife: A 6-year observational study. *J. Obstet. Gynaecol.*, 30(7), 759. [CONFERENCE ABSTRACT]

de Freitas Brilhante, A., a, Moreira Vasconcelos, C. T., de Castro Damasceno, A. K., Martins Pereira, A. M., da Silva Coelho, T., & Mendes de Freitas, C. (2017). OBSTETRICAL NURSES EVALUATION OF WATER BIRTHS. *Journal of Nursing UFPE / Revista de Enfermagem UFPE*, 11(11), 4418–4423. [WRONG STUDY DESIGN]

Demirel, G., Moraloglu, O., Celik, I. H., Erdeve, O., Mollamahmutoglu, L., Oguz, S. S., Uras, N., & Dilmen, U. (2013). The effects of water birth on neonatal outcomes: a five-year result of a referral tertiary centre. *European review for medical and pharmacological sciences*, 17(10), 1395–1398. [WRONG STUDY DESIGN]

Eberhard, J., & Geissbühler, V. (2000). Influence of alternative birth methods on traditional birth management. *Fetal Diagnosis And Therapy*, 15(5), 283–290. [WRONG STUDY DESIGN]

Eberhard J., Geissbuhler V., Chiffelle Ch., & Stein S. (2001). Alternative delivery methods and changes in obstetric practice. *Geburtshilfe Frauenheilkd.*, 61(10), 771–777. [UNABLE TO OBTAIN]

Eckert K., Turnbull D., & MacLennan A. (2001). Warm water bathing did not reduce use of pharmacological analgesia during the first stage of labour. *Evid.-Based Med.*, 6(6), 177. [CONFERENCE ABSTRACT]

Fehervary, P., Lauinger-Lörsch, E., Hof, H., Melchert, F., Bauer, L., & Zieger, W. (2004). Water birth: Microbiological colonisation of the newborn, neonatal and maternal infection rate in comparison to conventional bed deliveries. *Archives Of Gynecology And Obstetrics*, 270(1), 6–9. [WRONG OUTCOMES]

- Geissbühler, V., & Eberhard, J. (2000). Waterbirths: A comparative study. A prospective study on more than 2,000 waterbirths. *Fetal Diagnosis And Therapy*, 15(5), 291–300. [DUPLICATE]
- Geissbühler, V. & Eberhard, J. (2002). [Alternative obstetrics: Bed, chair or tub? Have alternative birthing methods become established?]. *Therapeutische Umschau. Revue Therapeutique*, 59(12), 689–695. [DISCUSSION NOT PRIMARY RESEARCH]
- Geissbühler, Verena, & Eberhard, J. (2003). Experience with water births: A prospective longitudinal study of 9 years with almost 4,000 water births]. *Gynakologisch-Geburtshilfliche Rundschau*, 43(1), 12–18. [REPRINTED PUBLICATION]
- Geissbuhler V. (2004). Alternative delivery positions: Bed, chair or water birth. *Geburtshilfe Frauenheilkd.*, 64(8), 856–857. [DISCUSSION NOT PRIMARY RESEARCH]
- Geissbuehler, V., Stein, S., & Eberhard, J. (2004). Waterbirths compared with landbirths: an observational study of nine years. *Journal of perinatal medicine*, 32(4), 308–314. <https://doi.org/10.1515/JPM.2004.057> [DUPLICATE]
- Gephart L.F., McDonald V., & Daucher J.A. (2013). A preliminary exploration of the affect of water birth on infantand maternal morbidity in the United States. *Female Pelvic Med. Reconstr. Surg.*, 19, S124. [CONFERENCE ABSTRACT]
- Ghasemi, M., Tara, F., & Ashraf, H. (2013). Maternal-fetal and neonatal complications of water-birth compared with conventional delivery. *Iranian Journal of Obstetrics, Gynecology and Infertility*, 16(70), 9–15. [UNABLE TO TRANSLATE TEXT]
- Ghasemi M., & Valiani M. (2014). Water Birth; method, benefits and indications in comparison with normal vaginal delivery in women parturient in Isfahan University of Medical Sciences' hospitals. *Iran. J. Reprod. Med.*, 12(6), 48–49. [DUPLICATE/UNABLE TO TRANSLATE]
- Grodzka, M., Makowska, P., Wielgoś, M., Przyboś, A., Chrostowska, J., & Marianowski, L. (2001). [Water birth in the parturients' estimation]. *Ginekologia Polska*, 72(12), 1025–1030. [UNABLE TO OBTAIN TEXT]
- Hesson A., Bailey J.M., Carver A.R., & Langen E.S. (2019). 673: Supporting Vaginal Birth: Effects of labor support measures on cesarean delivery rates. *Am. J. Obstet. Gynecol.*, 220(1), S445. [CONFERENCE ABSTRACT]
- Heydari S.T., Sarikhani Y., Asadi N., Kazemi M., Sadati A.K., Zarei S., Mansuri Z., Keshvarz F., Jabbari R., Mohtashami A., & Lankarani K.B. (2019). Selection of delivery method and its related factors in pregnant women of shiraz in 2016. *Shiraz E Med. J.*, 20(5), e81676. [WRONG STUDY DESIGN]
- Homer C, Eckert K, Turnbull D, & MacLennan A. (2002). Immersion in water during first stage of labor...Eckert K, Turnbull D, MacLennan A. Immersion in water in the first stage of labor: A randomized controlled trial. *BIRTH* 2001;28(2):84-93). *Birth: Issues in Perinatal Care*, 29(1), 76–77. [LETTER NOT RESEARCH]
- IRCT201511725002N2. (2016). The impact of water birth on childbirth. [Http://Www.Who.Int/Trialsearch/Trial2.aspx?TrialID=IRCT201511725002N2](http://Www.Who.Int/Trialsearch/Trial2.aspx?TrialID=IRCT201511725002N2). <https://www.cochranelibrary.com/central/doi/10.1002/central/CN-01870447/full> [WRONG PUBLICATION TYPE]
- Kavosi, Z., Keshtkaran, A., Setoodehzadeh, F., Kasraeian, M., Khammarnia, M., & Eslahi, M. (2015). A Comparison of Mothers' Quality of Life after Normal Vaginal, Cesarean, and Water Birth Deliveries. *International Journal of Community Based Nursing & Midwifery*, 3(3), 198–204. [WRONG OUTCOMES]
- Kiani K., Shahpourian F., Sedighian H., & Hosseini F. (2009). Effect of water birth on labor pain during active phase of labor. *Int. J. Gynecol. Obstet.*, 107, S227. [CONFERENCE ABSTRACT]
- Kowalewska, M., Welfel, E., Kawczyński, P., & Pokrzywnicka, M. (2004). [Clinical condition of newborns from water birth at the Perinatology Clinic, Institute of Gynecology and Obstetrics of the Medical University in Łódź, in the years 1996-2001]. *Ginekologia Polska*, 75(4), 267–273. [UNABLE TO TRANSLATE TEXT]
- Lukasse, M., Rowe, R., Townend, J., Knight, M., & Hollowell, J. (2014). Immersion in water for pain relief and the risk of intrapartum transfer among low risk nulliparous women: secondary analysis of the Birthplace national prospective cohort study. *BMC pregnancy and childbirth*, 14, 60. <https://doi.org/10.1186/1471-2393-14-60> [WRONG STUDY DESIGN]
- Malarewicz, A., Wydrzynski, G., Szymkiewicz, J., & Adamczyk-Gruszka, O. (2005). [The influence of water immersion on the course of first stage of parturition in primiparous women]. *Medycyna Wieku Rozwojowego*, 9(4), 773–780. [UNABLE TO OBTAIN TEXT]
- Maude, R.M., Kim, M. (2020). Getting into the water: a prospective observational study of water immersion for labour and birth at a New Zealand District Health Board. *BMC Pregnancy Childbirth* 20, 312 <https://doi.org/10.1186/s12884-020-03007-6> [WRONG STUDY DESIGN]
- Milosevic S, Channon S, Hunter B, Nolan M, Hughes J, Barlow C, Milton R, Sanders J, (2019) Factors influencing the use of birth pools in the United Kingdom: Perspectives of women, midwives and medical staff. *Midwifery*, 79 102554 <https://reader.elsevier.com/reader/sd/pii/S0266613810302451?token=69C52CCB1FB267BEF11B83215A5D48E075E410436F27E4E3CD500CBB70ED1EE8F5F7Do427832E46EDC51A669E78A73C&originRegion=eu-west-1&originCreation=20210824135734> [WRONG OUTCOMES AND STUDY DESIGN]

- Moneta, J., Oknińska, A., Wielgoś, M., Przyboś, A., Chrostowska, J., & Marianowski, L. (2001). [The influence of water immersion on the course of labor]. *Ginekologia Polska*, 72(12), 1031–1036. [UNABLE TO TRANSLATE]
- Montiel-Morales DP, Ferreira-Jaime F, Rendon-Macias ME (2016) Comparación del periodo de transición en recién nacidos obtenidos de parto en agua y parto en seco. Estudio de cohorts *Pediatría* 83 (5), 148-153 [WRONG OUTCOME]
- O'Sullivan M., Basude S., Bahl R., & Mohan A. (2017). Does giving birth in water increase rates of perineal trauma and OASI (Obstetric Anal Sphincter Injury)? *BJOG Int. J. Obstet. Gynaecol.*, 124, 69. [POSTER PRESENTATION]
- Overgaard, C., Fenger-Grøn, M., S, & all, J. (2012). Freestanding midwifery units versus obstetric units: Does the effect of place of birth differ with level of social disadvantage? *BMC Public Health*, 12, 478–478. [WRONG OUTCOMES]
- Peacock P.J., Zengeya S.T., Cochrane L., & Sleath M. (2017). Neonatal outcomes following delivery in water: Evaluation of safety in a district general hospital. *Arch. Dis. Child.*, 102, A92. [DUPLICATE]
- Pellantová, S., Vebera, Z., & Půcek, P. (2003). [Water delivery—a 5-year retrospective study]. *Ceska Gynekologie*, 68(3), 175–179. [UNABLE TO TRANSLATE]
- Righetti, P. L., Pernici, A., ra, Casadei, D., Panizzo, F., Romagnolo, C., & Maggino, T. (2009). La nascita: Uno sguardo al vissuto materno Una ricerca empirica sull'impatto di tre modalità di parto sull'emozionalità e le rappresentazioni materne = The birth: A look at the mothers' psychological view An empirical research on the impact of three methods of birth on emotionality and maternal representations. *Giornale Di Psicologia*, 3(1), 83–105. [WRONG STUDY DESIGN]
- Schröcksnadel, H., Kunczicky, V., Meier, J., Brezinka, C., & Oberaigner, W. (2003). Gebären im Wasser. Erfahrungen einer Universitätsklinik und eines Bezirkskrankenhauses in Österreich [Water Birth: experience at a university clinic and a district hospital in Austria]. *Gynakologisch-geburtshilfliche Rundschau*, 43(1), 7–11. <https://doi.org/10.1159/000067170> [ENGLISH TRANSLATION INSUFFICIENT]
- Sidebottom, A. C., Vacquier, M., Simon, K., Fontaine, P., Dahlgren-Roemmich, D., Hyer, B., Jackson, J., Steinbring, S., Wunderlich, W., & Saul, L. (2019). Who Gives Birth in the Water? A Retrospective Cohort Study of Intended versus Completed Waterbirths. *Journal of midwifery & women's health*, 64(4), 403–409. <https://doi.org/10.1111/jmwh.12961> [WRONG STUDY DESIGN]
- Sindik N. (2006). Water birth. *Gynaecol. Perinatol. Suppl.*, 15(1), 33–36. [UNABLE TO TRANSLATE]
- Sipiński, A., Poreba, R., Cnota, W., & Poreba, A. (2000). [The analysis of 135 water births]. *Ginekologia Polska*, 71(4), 208–212. [UNABLE TO TRANSLATE]
- Stark M.A., Rudell B., & Haus G. (2008). Observing position and movements in hydrotherapy: A pilot study. *JOGNN J. Obstet. Gynecol. Neonatal Nurs.*, 37(1), 116–122. [WRONG OUTCOMES]
- Suto, M., Takehara, K., Misago, C., & Matsui, M. (2015). Prevalence of Perineal Lacerations in Women Giving Birth at Midwife-Led Birth Centers in Japan: A Retrospective Descriptive Study. *Journal of midwifery & women's health*, 60(4), 419–427. <https://doi.org/10.1111/jmwh.12324> [WRONG STUDY DESIGN]
- Thoeni A., Oberhuber A., & Moroder L. (2003). Giving birth and being born in the water. Experience after 1325 waterbirths. *Ital. J. Gynaecol. Obstet.*, 15(3), 113–120. [UNABLE TO OBTAIN]
- Thoni A., & Azzolini M.E. (2003). A review of 1136 waterbirths. *G. Ital. Ostet. Ginecol.*, 25(7), 305–311. [UNABLE TO OBTAIN]
- Thoni A., & Krauss P. (2000). Waterbirth: A review of 500 deliveries and a comparison with other delivery positions. *Ital. J. Gynaecol. Obstet.*, 12(3), 83–87. [UNABLE TO OBTAIN]
- Thöni, A., & Murari, S. (2001). [Birth in water. A comparative study after 555 births in water]. *Minerva Ginecologica*, 53(1), 29–34. [UNABLE TO OBTAIN]
- Thoni A., & Mussner K. (2002). Water birth—A review of 969 deliveries and a comparison with other delivery positions. *Geburtshilfe Frauenheilkd.*, 62(10), 977–981. [UNABLE TO TRANSLATE]
- Thoni A., & Mussner K. (2002). Water birth—A review of 969 deliveries and a comparison with other delivery positions. *Geburtshilfe Frauenheilkd.*, 62(10), 977–981. [DUPLICATE]
- Thoni A (2004) Giving birth and being born in water *Midwifery Today* Summer 44-45 [EXTENDED ABSTRACT]
- Thöni, A., Zech, N., & Moroder, L. (2005). [Water birth and neonatal infections. Experience with 1575 deliveries in water]. *Minerva Ginecologica*, 57(2), 199–206. [UNABLE TO OBTAIN]
- Thoni A., Zech N., Moroder L., Mussner K., & Ploner F. (2005). The risk of infection in water births. *Gynakol. Prax.*, 29(2), 233–241. [UNABLE TO OBTAIN]

Thoni A., Murari S., & Zech N. (2006). Giving birth and being born in the water. Report following 1850 underwater births. *Ital. J. Gynaecol. Obstet.*, 18(1), 11–17. [UNABLE TO OBTAIN]

Thoni, A., Zech, N., Moroder, L., & Ploner, F. (2007). Die Kontamination des Wassers und die Infektionsrate bei der Wassergeburt [Water contamination and infection rate after water births]. *Gynakologisch-geburtshilfliche Rundschau*, 47(1), 33–38. <https://doi.org/10.1159/000098123> [WRONG STUDY DESIGN]

Thöni, A., Mussner, K., & Ploner, F. (2010). [Water birthing: Retrospective review of 2625 water births. Contamination of birth pool water and risk of microbial cross-infection]. *Minerva Ginecologica*, 62(3), 203–211. [UNABLE TO TRANSLATE]

Vanderlaan J. (2017). Retrospective Cohort Study of Hydrotherapy in Labor. *Journal of obstetric, gynecologic, and neonatal nursing : JOGNN*, 46(3), 403–410. <https://doi.org/10.1016/j.jogn.2016.11.018> [WRONG STUDY DESIGN]

Vanderlaan, J., Hall, P. J., & Lewitt, M. (2018). Neonatal outcomes with water birth: A systematic review and meta-analysis. *Midwifery*, 59, 27–38. <https://doi.org/10.1016/j.midw.2017.12.023> [WRONG STUDY DESIGN]

Zaidi J, Zaidi F, Bradshaw H, Cluett ER, Getliffe K, Pickering RM, Saunders NJS, Robins JB, & Smith R. (2004). Labouring in water...Cluett ER, Pickering RM, Getliffe K, Saunders NJ. Randomised controlled trial of labouring in water compared with standard of augmentation for management of dystocia in first stage of labour. *BMJ* 2004;328:314. (7 February.). *BMJ: British Medical Journal (International Edition)*, 328(7442), 767–768. [LETTER NOT RESEARCH]

Zanetti-Dällenbach, R. A., Holzgreve, W., & Hösli, I. (2007). Neonatal group B streptococcus colonization in water births. *International Journal Of Gynaecology And Obstetrics: The Official Organ Of The International Federation Of Gynaecology And Obstetrics*, 98(1), 54–55. [WRONG OUTCOMES]

Zanetti-Dallenbach R., Lapaire O., Holzgreve W., & Hosli I. (2007). Neonatal colonization-rate with group B streptococcus is lower in neonates born underwater than after conventional vaginal delivery. *Geburtshilfe Frauenheilkd.*, 67(10), 1114–1119. [WRONG STUDY OUTCOMES]

Zanetti-Dällenbach, R., Lapaire, O., Maertens, A., Frei, R., Holzgreve, W., & Hösli, I. (2006). Water birth: Is the water an additional reservoir for group B streptococcus? *Archives Of Gynecology And Obstetrics*, 273(4), 236–238. [WRONG STUDY DESIGN]

Zhao, Y., Xiao, M., Tang, F., Tang, W., Yin, H., Sun, G. Q., Lin, Y., Zhou, Y., Luo, Y., Li, L. M., & Tan, Z. H. (2017). The effect of water immersion delivery on the strength of pelvic floor muscle and pelvic floor disorders during postpartum period: An experimental study. *Medicine*, 96(41), e8124. <https://doi.org/10.1097/MD.0000000000008124> [WRONG OUTCOMES]
